# Supplementary material for: Symbiont-driven niche expansion shaped the adaptive radiation of insects
Source: Research Square preprint supplement (doi:10.21203/rs.3.rs-1063949/v2), 2022-06-28
Supplement: Supplementary file 2 [file 9cefa02d92ac1c5e9cea0306.xlsx]

## Sheet: Table S1
Table S1: Data on obligate symbioses, diets and diversfication rates across insect families
Insect order	Insect family	Host phylogeny tip	holo/hemimetabolous	Family feeding niche	Species feeding niches	# species ObCrit	# species genbank	Total # species	Total # obligate species	Proportion obligate	Obligate dataset	Diversification dataset	Bacteria dataset	Notes
Blattodea	Anaplectidae	Blattodea_Anaplectidae	hemi	mixed	omnivory, detritivores	2	2	2	2	1	restricted	exclude	yes	family added to phylogeny based on Arab et al 2020
Blattodea	Archotermopsidae (Termopsidae)	Blattodea_Archotermopsidae	hemi	xylophagy	xylophagy	1		1	1	1	restricted	include	yes
Blattodea	Blaberidae	Blattodea_Blaberidae	hemi	mixed	omnivory, xylophagy, detritivores	19	22	22	22	1	restricted	include	yes
Blattodea	Blattidae	Blattodea_Blattidae	hemi	mixed	omnivory, detritivores	10	13	13	13	1	restricted	include	yes
Blattodea	Corydiidae	Blattodea_Corydiidae	hemi	mixed	detritivores	2	4	4	4	1	restricted	include	yes
Blattodea	Cryptocercidae	Blattodea_Cryptocercidae	hemi	xylophagy	xylophagy	2	10	10	10	1	restricted	include	yes
Blattodea	Ectobiidae	Blattodea_Ectobiidae	hemi	mixed	omnivory, detritivores	16	17	17	17	1	restricted	include	yes
Blattodea	Lamproblattidae	Blattodea_Lamproblattidae	hemi	mixed	omnivory, detritivores	1		1	1	1	restricted	exclude	yes	family added to phylogeny based on Arab et al 2020
Blattodea	Mastotermitidae	Blattodea_Mastotermitidae	hemi	mixed	xylophagy, omnivory	1	1	1	1	1	restricted	include	yes
Blattodea	Nocticolidae	Blattodea_Nocticolidae	hemi	mixed	detritivores	3		3	0	0	restricted	include	yes
Blattodea	Rhinotermitidae	Blattodea_Rhinotermitidae	hemi	xylophagy	xylophagy	2		2	2	1	restricted	include	yes
Blattodea	Termitidae	Blattodea_Termitidae	hemi	mixed	xylophagy, herbivory, fungivory, omnivory	1	1	1	1	1	restricted	include	yes
Blattodea	Tryonicidae	Blattodea_Tryonicidae	hemi	mixed	omnivory, detritivores	1	1	1	1	1	restricted	exclude	yes	family added to phylogeny based on Arab et al 2020
Coleoptera	Anobiidae	Coleoptera_Anobiidae	holo	xylophagy	predominantly xylophagy (some granivory, herbivory)	2	2	2	2	1	restricted	include	no
Coleoptera	Bostrichidae	Coleoptera_Bostrichidae	holo	xylophagy	predominantly xylophagy (some granivory)	7		7	7	1	restricted	include	yes
Coleoptera	Cerambycidae	Coleoptera_Cerambycidae	holo	xylophagy	predominantly xylophagy (some herbivory)	12		12	9	0.75	restricted	include	no
Coleoptera	Chrysomelidae	Coleoptera_Chrysomelidae	holo	phytophagy	herbivory, phloem-feeding	48		48	46	0.958333	restricted	include	yes
Coleoptera	Curculionidae	Coleoptera_Curculionidae	holo	phytophagy	herbivory, granivory, xylophagy	48	43	48	47	0.979167	restricted	include	yes
Coleoptera	Laemophloeidae	Coleoptera_Laemophloeidae	holo	fungivory	fungivory	1		1	0	0	restricted	include	yes
Coleoptera	Melyridae	Coleoptera_Melyridae	holo	mixed	pollen-feeding, predatory	2		2	2	1	restricted	include	yes
Coleoptera	Nosodendridae	Coleoptera_Nosodendridae	holo	mixed	fungivory, phloem-feeding, predatory	2		2	2	1	restricted	include	yes
Coleoptera	Scarabaeidae	Coleoptera_Scarabaeidae	holo	mixed	coprophagy, omnivory	3		3	0	0	restricted	include	yes
Coleoptera	Silvanidae	Coleoptera_Silvanidae	holo	mixed	fungivory, granivory	3		3	1	0.333333	restricted	include	yes
Coleoptera	Throscidae	Coleoptera_Throscidae	holo	mixed	fungivory, pollen-feeding	1		1	1	1	restricted	include	yes
Diptera	Ceratopogonidae	Diptera_Ceratopogonidae	holo	phytophagy	frugivory, herbivory, phloem-feeding	3		3	2	0.666667	restricted	include	yes
Diptera	Culicidae	Diptera_Culicidae	holo	mixed	omnivory	1		1	0	0	restricted	include	yes
Diptera	Drosophilidae	Diptera_Drosophilidae	holo	mixed	fungivory, herbivory	1		1	0	0	restricted	include	yes
Diptera	Glossinidae	Diptera_Glossinidae	holo	hematophagy	hematophagy	8	13	13	13	1	restricted	include	yes
Diptera	Hippoboscidae	Diptera_Hippoboscidae	holo	hematophagy	hematophagy	7	1	7	7	1	restricted	include	yes
Diptera	Nycteribiidae	Diptera_Nycteribiidae	holo	hematophagy	hematophagy	14	12	14	14	1	restricted	include	yes
Diptera	Psychodidae	Diptera_Psychodidae	holo	mixed	omnivory	1		1	0	0	restricted	include	yes
Diptera	Streblidae	Diptera_Streblidae	holo	hematophagy	hematophagy	2		2	2	1	restricted	include	yes
Diptera	Tabanidae	Diptera_Tabanidae	holo	mixed	omnivory	1		1	0	0	restricted	include	yes
Ephemeroptera	Acanthametropodidae	Ephemeroptera_Acanthametropodidae	hemi	predatory		1		1	0	0	full	include	yes
Ephemeroptera	Ameletidae	Ephemeroptera_Ameletidae	hemi	mixed		1		1	0	0	full	include	yes
Ephemeroptera	Ameletopsidae	Ephemeroptera_Ameletopsidae	hemi	predatory		1		1	0	0	full	include	yes
Ephemeroptera	Ametropodidae	Ephemeroptera_Ametropodidae	hemi	mixed		1		1	0	0	full	include	yes
Ephemeroptera	Baetidae	Ephemeroptera_Baetidae	hemi	mixed		1		1	0	0	full	include	yes
Ephemeroptera	Baetiscidae	Ephemeroptera_Baetiscidae	hemi	mixed		1		1	0	0	full	include	yes
Ephemeroptera	Behningiidae	Ephemeroptera_Behningiidae	hemi	predatory		1		1	0	0	full	include	yes
Ephemeroptera	Caenidae	Ephemeroptera_Caenidae	hemi	mixed		1		1	0	0	full	include	yes
Ephemeroptera	Coloburiscidae	Ephemeroptera_Coloburiscidae	hemi	mixed		1		1	0	0	full	include	yes
Ephemeroptera	Dipteromimidae	Ephemeroptera_Dipteromimidae	hemi	mixed		1		1	0	0	full	include	yes	Diet estimated by closest relative Isonychiidae
Ephemeroptera	Ephemerellidae	Ephemeroptera_Ephemerellidae	hemi	mixed		1		1	0	0	full	include	yes
Ephemeroptera	Ephemeridae	Ephemeroptera_Ephemeridae	hemi	mixed		1		1	0	0	full	include	yes
Ephemeroptera	Euthyplociidae	Ephemeroptera_Euthyplociidae	hemi	mixed		1		1	0	0	full	include	yes
Ephemeroptera	Heptageniidae	Ephemeroptera_Heptageniidae	hemi	mixed		1		1	0	0	full	include	yes
Ephemeroptera	Ichthybotidae	Ephemeroptera_Ichthybotidae	hemi	mixed		1		1	0	0	full	include	yes
Ephemeroptera	Isonychiidae	Ephemeroptera_Isonychiidae	hemi	mixed		1		1	0	0	full	include	yes
Ephemeroptera	Leptohyphidae	Ephemeroptera_Leptohyphidae	hemi	mixed		1		1	0	0	full	include	yes
Ephemeroptera	Leptophlebiidae	Ephemeroptera_Leptophlebiidae	hemi	mixed		1		1	0	0	full	include	yes
Ephemeroptera	Metretopodidae	Ephemeroptera_Metretopodidae	hemi	mixed		1		1	0	0	full	include	yes
Ephemeroptera	Neoephemeridae	Ephemeroptera_Neoephemeridae	hemi	mixed		1		1	0	0	full	include	yes
Ephemeroptera	Nesameletidae	Ephemeroptera_Nesameletidae	hemi	mixed		1		1	0	0	full	include	yes
Ephemeroptera	Oligoneuriidae	Ephemeroptera_Oligoneuriidae	hemi	mixed		1		1	0	0	full	include	yes
Ephemeroptera	Oniscigastridae	Ephemeroptera_Oniscigastridae	hemi	mixed		1		1	0	0	full	include	yes
Ephemeroptera	Palingeniidae	Ephemeroptera_Palingeniidae	hemi	mixed		1		1	0	0	full	include	yes
Ephemeroptera	Polymitarcyidae	Ephemeroptera_Polymitarcyidae	hemi	mixed		1		1	0	0	full	include	yes
Ephemeroptera	Potamanthidae	Ephemeroptera_Potamanthidae	hemi	mixed		1		1	0	0	full	include	yes
Ephemeroptera	Prosopistomatidae	Ephemeroptera_Prosopistomatidae	hemi	predatory		1		1	0	0	full	include	yes
Ephemeroptera	Rallidentidae	Ephemeroptera_Rallidentidae	hemi	mixed		1		1	0	0	full	include	yes
Ephemeroptera	Siphlaenigmatidae	Ephemeroptera_Siphlaenigmatidae	hemi	mixed		1		1	0	0	full	include	yes
Ephemeroptera	Siphlonuridae	Ephemeroptera_Siphlonuridae	hemi	mixed		1		1	0	0	full	include	yes
Ephemeroptera	Teloganodidae	Ephemeroptera_Teloganodidae	hemi	mixed		1		1	0	0	full	include	yes
Ephemeroptera	Tricorythidae	Ephemeroptera_Tricorythidae	hemi	mixed		1		1	0	0	full	include	yes
Hemiptera	Acanaloniidae	Hemiptera_Acanaloniidae	hemi	phloem	phloem-feeding	2		2	2	1	restricted	exclude	yes	family added to phylogeny based on Moran et al 2005
Hemiptera	Acanthosomatidae	Hemiptera_Acanthosomatidae	hemi	phytophagy	herbivory, frugivory	13	14	14	14	1	restricted	include	yes
Hemiptera	Achilidae	Hemiptera_Achilidae	hemi	mixed	phloem-feeding, fungivory	10	5	10	10	1	restricted	include	yes
Hemiptera	Adelgidae	Hemiptera_Adelgidae	hemi	phytophagy	phloem-feeding, herbivory	6	16	16	16	1	restricted	exclude	yes	family added to phylogeny based on Gullan and Cook 2007
Hemiptera	Aleyrodidae	Hemiptera_Aleyrodidae	hemi	phloem	phloem-feeding	22	25	25	25	1	restricted	include	yes
Hemiptera	Anthocoridae	Hemiptera_Anthocoridae	hemi	predatory	predatory	1		1	0	0	restricted	include	yes
Hemiptera	Aphidoidea	Hemiptera_Aphidoidea	hemi	phloem	phloem-feeding	34	526	526	526	1	restricted	include	yes
Hemiptera	Aphrophoridae	Hemiptera_Aphrophoridae	hemi	xylem	xylem-feeding	13	11	13	13	1	restricted	include	yes
Hemiptera	Aradidae	Hemiptera_Aradidae	hemi	fungivory	fungivory	1		1	0	0	restricted	include	yes
Hemiptera	Blissidae	Hemiptera_Blissidae	hemi	phloem	phloem-feeding	1	1	1	1	1	restricted	exclude	yes	family added to phylogeny based on Henry 1997
Hemiptera	Caliscelidae	Hemiptera_Caliscelidae	hemi	phloem	phloem-feeding	2		2	2	1	restricted	include	yes
Hemiptera	Calophyidae	Hemiptera_Calophyidae	hemi	phloem	phloem-feeding	1	1	1	1	1	restricted	exclude	yes	family added to phylogeny based on Cho et al 2019
Hemiptera	Cercopidae	Hemiptera_Cercopidae	hemi	xylem	xylem-feeding	12	16	16	16	1	restricted	include	yes
Hemiptera	Cicadellidae	Hemiptera_Cicadellidae	hemi	phytophagy	xylem-feeding, phloem-feeding, herbivory	82	62	82	64	0.780488	restricted	include	no
Hemiptera	Cicadidae	Hemiptera_Cicadidae	hemi	xylem	xylem-feeding	1	84	84	84	1	restricted	include	yes
Hemiptera	Cimicidae	Hemiptera_Cimicidae	hemi	hematophagy	hematophagy	1		1	1	1	restricted	include	yes
Hemiptera	Cixiidae	Hemiptera_Cixiidae	hemi	phloem	predominantly phloem-feeding (some herbivory, fungivory)	33	10	33	33	1	restricted	include	yes	Family feeding niche based on O’Brien and Wilson 1985
Hemiptera	Clastopteridae	Hemiptera_Clastopteridae	hemi	xylem	xylem-feeding	3	3	3	3	1	restricted	include	yes
Hemiptera	Coelostomidiidae	Hemiptera_Coelostomidiidae	hemi	phloem	phloem-feeding	7		7	7	1	restricted	exclude	yes	family added to phylogeny based on Vea and Grimaldi 2016
Hemiptera	Coreidae	Hemiptera_Coreidae	hemi	phytophagy	herbivory	1		1	1	1	restricted	include	yes
Hemiptera	Corixidae	Hemiptera_Corixidae	hemi	mixed	omnivory	1		1	0	0	restricted	include	yes
Hemiptera	Dactylopiidae	Hemiptera_Dactylopiidae	hemi	phloem	phloem-feeding	1	2	2	2	1	restricted	exclude	yes	family added to phylogeny based on Vea and Grimaldi 2016
Hemiptera	Delphacidae	Hemiptera_Delphacidae	hemi	phloem	phloem-feeding	80	2	80	80	1	restricted	include	no
Hemiptera	Derbidae	Hemiptera_Derbidae	hemi	mixed	fungivory, phloem-feeding	17	1	17	17	1	restricted	include	yes
Hemiptera	Diaspididae	Hemiptera_Diaspididae	hemi	phytophagy	phloem-feeding, herbivory	63	281	281	281	1	restricted	exclude	yes	family added to phylogeny based on Vea and Grimaldi 2016
Hemiptera	Dictyopharidae	Hemiptera_Dictyopharidae	hemi	phloem	phloem-feeding	22	12	22	22	1	restricted	include	yes
Hemiptera	Epipygidae	Hemiptera_Epipygidae	hemi	phloem	phloem-feeding	1	1	1	1	1	restricted	include	yes
Hemiptera	Eriococcidae	Hemiptera_Eriococcidae	hemi	phytophagy	phloem-feeding, herbivory	7	1	7	3	0.428571	restricted	exclude	yes	family added to phylogeny based on Vea and Grimaldi 2016
Hemiptera	Eurybrachyidae	Hemiptera_Eurybrachidae	hemi	phloem	phloem-feeding	1	1	1	1	1	restricted	include	yes
Hemiptera	Flatidae	Hemiptera_Flatidae	hemi	phloem	phloem-feeding	9	1	9	9	1	restricted	include	no
Hemiptera	Fulgoridae	Hemiptera_Fulgoridae	hemi	phloem	phloem-feeding	24	44	44	44	1	restricted	include	yes
Hemiptera	Geocoridae	Hemiptera_Geocoridae	hemi	mixed	omnivory	3		3	1	0.333333	restricted	exclude	yes	family added to phylogeny based on Henry 1997
Hemiptera	Gerridae	Hemiptera_Gerridae	hemi	predatory	predatory	1		1	0	0	restricted	include	yes
Hemiptera	Hebridae	Hemiptera_Hebridae	hemi	predatory	predatory	1		1	0	0	restricted	include	yes
Hemiptera	Hydrometridae	Hemiptera_Hydrometridae	hemi	predatory	predatory	1		1	0	0	restricted	include	yes
Hemiptera	Issidae	Hemiptera_Issidae	hemi	phloem	phloem-feeding	18		18	18	1	restricted	include	yes
Hemiptera	Leptopodidae	Hemiptera_Leptopodidae	hemi	predatory	predatory	1		1	0	0	restricted	include	yes
Hemiptera	Lophopidae	Hemiptera_Lophopidae	hemi	phloem	phloem-feeding	1		1	1	1	restricted	include	yes
Hemiptera	Lygaeidae	Hemiptera_Lygaeidae	hemi	phytophagy	granivory	15	8	15	12	0.8	restricted	include	yes
Hemiptera	Machaerotidae	Hemiptera_Machaerotidae	hemi	xylem	xylem-feeding	4	3	4	4	1	restricted	include	yes
Hemiptera	Meenoplidae	Hemiptera_Meenoplidae	hemi	phloem	phloem-feeding	5	1	5	5	1	restricted	include	yes
Hemiptera	Membracidae	Hemiptera_Membracidae	hemi	phloem	phloem-feeding	98	7	98	98	1	restricted	include	yes
Hemiptera	Miridae	Hemiptera_Miridae	hemi	mixed	omnivory	2		2	0	0	restricted	include	yes
Hemiptera	Monophlebidae	Hemiptera_Monophlebidae	hemi	phloem	phloem-feeding	3	1	3	3	1	restricted	exclude	yes	family added to phylogeny based on Vea and Grimaldi 2016
Hemiptera	Nabidae	Hemiptera_Nabidae	hemi	predatory	predatory	1		1	0	0	restricted	include	yes
Hemiptera	Naucoridae	Hemiptera_Naucoridae	hemi	predatory	predatory	1		1	0	0	restricted	include	yes
Hemiptera	Nepidae	Hemiptera_Nepidae	hemi	predatory	predatory	1		1	0	0	restricted	include	yes
Hemiptera	Nogodinidae	Hemiptera_Nogodinidae	hemi	phloem	phloem-feeding	2	2	2	2	1	restricted	include	yes
Hemiptera	Notonectidae	Hemiptera_Notonectidae	hemi	predatory	predatory	1		1	0	0	restricted	include	yes
Hemiptera	Parastrachiidae	Hemiptera_Parastrachiidae	hemi	phytophagy	frugivory	1	1	1	1	1	restricted	exclude	yes	family added to phylogeny based on Gordon et al 2016
Hemiptera	Peloridiidae	Hemiptera_Peloridiidae	hemi	phloem	phloem-feeding	15		15	15	1	restricted	include	yes
Hemiptera	Pentatomidae	Hemiptera_Pentatomidae	hemi	phytophagy	herbivory, granivory, phloem-feeding	8	1	8	6	0.75	restricted	include	yes
Hemiptera	Phylloxeridae	Hemiptera_Phylloxeridae	hemi	phytophagy	herbivory	2		2	0	0	restricted	exclude	yes	family added to phylogeny based on Rebijith et al 2017
Hemiptera	Piesmatidae	Hemiptera_Piesmatidae	hemi	phytophagy		1		1	0	0	restricted	include	yes
Hemiptera	Plataspidae	Hemiptera_Plataspidae	hemi	phloem	phloem-feeding	7	7	7	7	1	restricted	include	yes
Hemiptera	Pseudococcidae	Hemiptera_Pseudococcidae	hemi	phloem	phloem-feeding	36	61	36	33	0.916667	restricted	exclude	yes	family added to phylogeny based on Vea and Grimaldi 2016
Hemiptera	Psyllidae	Hemiptera_Psyllidae	hemi	phloem	phloem-feeding	25	15	25	25	1	restricted	exclude	yes	family added to phylogeny based on Cho et al 2019
Hemiptera	Pyrrhocoridae	Hemiptera_Pyrrhocoridae	hemi	mixed	granivory, predatory	2		2	2	1	restricted	include	yes
Hemiptera	Reduviidae	Hemiptera_Reduviidae	hemi	mixed	predatory, hematophagy	2	4	4	4	1	restricted	include	yes
Hemiptera	Rhopalidae	Hemiptera_Rhopalidae	hemi	phytophagy	herbivory, granivory	6		6	0	0	restricted	include	yes
Hemiptera	Rhyparochromidae	Hemiptera_Rhyparochromidae	hemi	phytophagy	granivory	2		2	0	0	restricted	exclude	yes	family added to phylogeny based on Henry 1997
Hemiptera	Ricaniidae	Hemiptera_Ricaniidae	hemi	phloem	phloem-feeding	2		2	2	1	restricted	include	yes
Hemiptera	Saldidae	Hemiptera_Saldidae	hemi	predatory	predatory	1		1	0	0	restricted	include	yes
Hemiptera	Scutelleridae	Hemiptera_Scutelleridae	hemi	phytophagy	herbivory, granivory	2		2	2	1	restricted	include	yes
Hemiptera	Tettigometridae	Hemiptera_Tettigometridae	hemi	phloem	phloem-feeding	6	1	6	6	1	restricted	include	yes
Hemiptera	Tingidae	Hemiptera_Tingidae	hemi	phytophagy	herbivory	1		1	0	0	restricted	include	yes
Hemiptera	Triozidae	Hemiptera_Triozidae	hemi	phloem	phloem-feeding	4	5	5	5	1	restricted	exclude	yes	family added to phylogeny based on Cho et al 2019
Hemiptera	Tropiduchidae	Hemiptera_Tropiduchidae	hemi	phloem	phloem-feeding	6	1	6	6	1	restricted	include	yes
Hemiptera	Urostylididae	Hemiptera_Urostylididae	hemi	mixed	predatory, phloem-feeding	2	1	2	2	1	restricted	exclude	yes	family added to phylogeny based on Gordon et al 2016
Hemiptera	Veliidae	Hemiptera_Veliidae	hemi	predatory	predatory	1		1	0	0	restricted	include	yes
Hymenoptera	Ampulicidae	Hymenoptera_Ampulicidae	holo	mixed		1		1	0	0	full	include	yes
Hymenoptera	Andrenidae	Hymenoptera_Andrenidae	holo	phytophagy		1		1	0	0	full	include	yes
Hymenoptera	Apidae	Hymenoptera_Apidae	holo	phytophagy		1		1	0	0	full	include	yes
Hymenoptera	Argidae	Hymenoptera_Argidae	holo	phytophagy		1		1	0	0	full	include	yes
Hymenoptera	Bethylidae	Hymenoptera_Bethylidae	holo	mixed		1		1	0	0	full	include	yes
Hymenoptera	Blasticotomidae	Hymenoptera_Blasticotomidae	holo	phytophagy		1		1	0	0	full	include	yes
Hymenoptera	Chrysididae	Hymenoptera_Chrysididae	holo	mixed		1		1	0	0	full	include	yes
Hymenoptera	Cimbicidae	Hymenoptera_Cimbicidae	holo	phytophagy		1		1	0	0	full	include	yes
Hymenoptera	Colletidae	Hymenoptera_Colletidae	holo	phytophagy		1		1	0	0	full	include	yes
Hymenoptera	Crabronidae	Hymenoptera_Crabronidae	holo	mixed	predatory, nectar-feeding	34		34	0	0	restricted	include	yes
Hymenoptera	Diprionidae	Hymenoptera_Diprionidae	holo	phytophagy		1		1	0	0	full	include	yes
Hymenoptera	Encyrtidae	Hymenoptera_Encyrtidae	holo	mixed	predatory, nectar-feeding	1		1	0	0	restricted	include	yes
Hymenoptera	Eulophidae	Hymenoptera_Eulophidae	holo	mixed	predatory, nectar-feeding	1		1	0	0	restricted	include	yes
Hymenoptera	Formicidae	Hymenoptera_Formicidae	holo	mixed	omnivory, fungivory	23	49	23	18	0.782609	restricted	include	yes
Hymenoptera	Halictidae	Hymenoptera_Halictidae	holo	phytophagy		1		1	0	0	full	include	yes
Hymenoptera	Megachilidae	Hymenoptera_Megachilidae	holo	phytophagy		1		1	0	0	full	include	yes
Hymenoptera	Melittidae	Hymenoptera_Melittidae	holo	phytophagy		1		1	0	0	full	include	yes
Hymenoptera	Mutillidae	Hymenoptera_Mutillidae	holo	mixed		1		1	0	0	full	include	yes
Hymenoptera	Pergidae	Hymenoptera_Pergidae	holo	phytophagy		1		1	0	0	full	include	yes
Hymenoptera	Plumariidae	Hymenoptera_Plumariidae	holo	phytophagy		1		1	0	0	full	include	yes
Hymenoptera	Pompilidae	Hymenoptera_Pompilidae	holo	mixed		1		1	0	0	full	include	yes
Hymenoptera	Scolebythidae	Hymenoptera_Scolebythidae	holo	mixed		1		1	0	0	full	include	yes
Hymenoptera	Scoliidae	Hymenoptera_Scoliidae	holo	mixed		1		1	0	0	full	include	yes
Hymenoptera	Sphecidae	Hymenoptera_Sphecidae	holo	mixed		1		1	0	0	full	include	yes
Hymenoptera	Stenotritidae	Hymenoptera_Stenotritidae	holo	phytophagy		1		1	0	0	full	include	yes
Hymenoptera	Tenthredinidae	Hymenoptera_Tenthredinidae	holo	phytophagy		1		1	0	0	full	include	yes
Hymenoptera	Tiphiidae	Hymenoptera_Tiphiidae	holo	mixed		1		1	0	0	full	include	yes
Hymenoptera	Vespidae	Hymenoptera_Vespidae	holo	mixed		1		1	0	0	full	include	yes
Lepidoptera	Acanthopteroctetidae	Lepidoptera_Acanthopteroctetidae	holo	phytophagy		1		1	0	0	full	include	yes
Lepidoptera	Acrolophidae	Lepidoptera_Acrolophidae	holo	mixed		1		1	0	0	full	include	yes
Lepidoptera	Adelidae	Lepidoptera_Adelidae	holo	phytophagy		1		1	0	0	full	include	yes
Lepidoptera	Agathiphagidae	Lepidoptera_Agathiphagidae	holo	phytophagy		1		1	0	0	full	include	yes
Lepidoptera	Agonoxenidae	Lepidoptera_Agonoxenidae	holo	phytophagy		1		1	0	0	full	include	yes
Lepidoptera	Aididae	Lepidoptera_Aididae	holo	phytophagy		1		1	0	0	full	include	yes
Lepidoptera	Alucitidae	Lepidoptera_Alucitidae	holo	phytophagy		1		1	0	0	full	include	yes
Lepidoptera	Amphisbatidae	Lepidoptera_Amphisbatidae	holo	phytophagy		1		1	0	0	full	include	yes
Lepidoptera	Andesianidae	Lepidoptera_Andesianidae	holo	phytophagy		1		1	0	0	full	include	yes
Lepidoptera	Anomoeotidae	Lepidoptera_Anomoeotidae	holo	phytophagy		1		1	0	0	full	include	yes
Lepidoptera	Anthelidae	Lepidoptera_Anthelidae	holo	phytophagy		1		1	0	0	full	include	yes
Lepidoptera	Apatelodidae	Lepidoptera_Apatelodidae	holo	phytophagy		1		1	0	0	full	include	yes
Lepidoptera	Arctiidae	Lepidoptera_Arctiidae	holo	mixed		1		1	0	0	full	include	yes
Lepidoptera	Argyresthiidae	Lepidoptera_Argyresthiidae	holo	phytophagy		1		1	0	0	full	include	yes
Lepidoptera	Arrhenophanidae	Lepidoptera_Arrhenophanidae	holo	fungivory		1		1	0	0	full	include	yes
Lepidoptera	Autostichidae	Lepidoptera_Autostichidae	holo	mixed		1		1	0	0	full	include	yes
Lepidoptera	Batrachedridae	Lepidoptera_Batrachedridae	holo	phytophagy		1		1	0	0	full	include	yes
Lepidoptera	Bedelliidae	Lepidoptera_Bedelliidae	holo	phytophagy		1		1	0	0	full	include	yes
Lepidoptera	Blastobasidae	Lepidoptera_Blastobasidae	holo	mixed		1		1	0	0	full	include	yes
Lepidoptera	Bombycidae	Lepidoptera_Bombycidae	holo	phytophagy		1		1	0	0	full	include	yes
Lepidoptera	Brachodidae	Lepidoptera_Brachodidae	holo	phytophagy		1		1	0	0	full	include	yes
Lepidoptera	Brahmaeidae	Lepidoptera_Brahmaeidae	holo	phytophagy		1		1	0	0	full	include	yes
Lepidoptera	Bucculatricidae	Lepidoptera_Bucculatricidae	holo	phytophagy		1		1	0	0	full	include	yes
Lepidoptera	Callidulidae	Lepidoptera_Callidulidae	holo	phytophagy		1		1	0	0	full	include	yes
Lepidoptera	Carposinidae	Lepidoptera_Carposinidae	holo	phytophagy		1		1	0	0	full	include	yes
Lepidoptera	Carthaeidae	Lepidoptera_Carthaeidae	holo	phytophagy		1		1	0	0	full	include	yes
Lepidoptera	Castniidae	Lepidoptera_Castniidae	holo	phytophagy		1		1	0	0	full	include	yes
Lepidoptera	Choreutidae	Lepidoptera_Choreutidae	holo	phytophagy		1		1	0	0	full	include	yes
Lepidoptera	Cimeliidae	Lepidoptera_Cimeliidae	holo	phytophagy		1		1	0	0	full	include	yes
Lepidoptera	Coleophoridae	Lepidoptera_Coleophoridae	holo	phytophagy		1		1	0	0	full	include	yes
Lepidoptera	Copromorphidae	Lepidoptera_Copromorphidae	holo	phytophagy		1		1	0	0	full	include	yes
Lepidoptera	Cosmopterigidae	Lepidoptera_Cosmopterigidae	holo	phytophagy		1		1	0	0	full	include	yes
Lepidoptera	Cossidae	Lepidoptera_Cossidae	holo	xylophagy	xylophagy	1		1	0	0	restricted	include	yes
Lepidoptera	Crambidae	Lepidoptera_Crambidae	holo	phytophagy		1		1	0	0	full	include	yes
Lepidoptera	Crinopterygidae	Lepidoptera_Crinopterygidae	holo	phytophagy		1		1	0	0	full	include	yes
Lepidoptera	Cyclotornidae	Lepidoptera_Cyclotornidae	holo	predatory		1		1	0	0	full	include	yes
Lepidoptera	Dalceridae	Lepidoptera_Dalceridae	holo	phytophagy		1		1	0	0	full	include	yes
Lepidoptera	Deoclonidae	Lepidoptera_Deoclonidae	holo	phytophagy		1		1	0	0	full	include	yes
Lepidoptera	Deuterogoniidae	Lepidoptera_Deuterogoniidae	holo	phytophagy		1		1	0	0	full	include	yes
Lepidoptera	Douglasiidae	Lepidoptera_Douglasiidae	holo	phytophagy		1		1	0	0	full	include	yes
Lepidoptera	Drepanidae	Lepidoptera_Drepanidae	holo	phytophagy		1		1	0	0	full	include	yes
Lepidoptera	Dudgeoneidae	Lepidoptera_Dudgeoneidae	holo	xylophagy	xylophagy	1		1	0	0	full	include	yes
Lepidoptera	Elachistidae	Lepidoptera_Elachistidae	holo	phytophagy		1		1	0	0	full	include	yes
Lepidoptera	Endromidae	Lepidoptera_Endromidae	holo	phytophagy		1		1	0	0	full	include	yes
Lepidoptera	Epicopeiidae	Lepidoptera_Epicopeiidae	holo	phytophagy		1		1	0	0	full	include	yes
Lepidoptera	Epipyropidae	Lepidoptera_Epipyropidae	holo	predatory		1		1	0	0	full	include	yes
Lepidoptera	Eriocottidae	Lepidoptera_Eriocottidae	holo	mixed		1		1	0	0	full	include	yes
Lepidoptera	Eriocraniidae	Lepidoptera_Eriocraniidae	holo	phytophagy		1		1	0	0	full	include	yes
Lepidoptera	Eupterotidae	Lepidoptera_Eupterotidae	holo	phytophagy		1		1	0	0	full	include	yes
Lepidoptera	Gelechiidae	Lepidoptera_Gelechiidae	holo	phytophagy		1		1	0	0	full	include	yes
Lepidoptera	Geometridae	Lepidoptera_Geometridae	holo	phytophagy		1		1	0	0	full	include	yes
Lepidoptera	Glyphidoceridae	Lepidoptera_Glyphidoceridae	holo	phytophagy		1		1	0	0	full	include	yes
Lepidoptera	Glyphipterigidae	Lepidoptera_Glyphipterigidae	holo	phytophagy		1		1	0	0	full	include	yes
Lepidoptera	Gracillariidae	Lepidoptera_Gracillariidae	holo	phytophagy		1		1	0	0	full	include	yes
Lepidoptera	Hedylidae	Lepidoptera_Hedylidae	holo	phytophagy		1		1	0	0	full	include	yes
Lepidoptera	Heliozelidae	Lepidoptera_Heliozelidae	holo	phytophagy		1		1	0	0	full	include	yes
Lepidoptera	Hepialidae	Lepidoptera_Hepialidae	holo	mixed		1		1	0	0	full	include	yes
Lepidoptera	Hesperiidae	Lepidoptera_Hesperiidae	holo	phytophagy		1		1	0	0	full	include	yes
Lepidoptera	Heterobathmiidae	Lepidoptera_Heterobathmiidae	holo	phytophagy		1		1	0	0	full	include	yes
Lepidoptera	Heterogynidae	Lepidoptera_Heterogynidae	holo	phytophagy		1		1	0	0	full	include	yes
Lepidoptera	Himantopteridae	Lepidoptera_Himantopteridae	holo	phytophagy		1		1	0	0	full	include	yes
Lepidoptera	Hyblaeidae	Lepidoptera_Hyblaeidae	holo	phytophagy		1		1	0	0	full	include	yes
Lepidoptera	Immidae	Lepidoptera_Immidae	holo	phytophagy		1		1	0	0	full	include	yes
Lepidoptera	Incurvariidae	Lepidoptera_Incurvariidae	holo	phytophagy		1		1	0	0	full	include	yes
Lepidoptera	Lacturidae	Lepidoptera_Lacturidae	holo	phytophagy		1		1	0	0	full	include	yes
Lepidoptera	Lasiocampidae	Lepidoptera_Lasiocampidae	holo	phytophagy		1		1	0	0	full	include	yes
Lepidoptera	Lecithoceridae	Lepidoptera_Lecithoceridae	holo	mixed		1		1	0	0	full	include	yes
Lepidoptera	Lemoniidae	Lepidoptera_Lemoniidae	holo	phytophagy		1		1	0	0	full	include	yes
Lepidoptera	Limacodidae	Lepidoptera_Limacodidae	holo	phytophagy		1		1	0	0	full	include	yes
Lepidoptera	Lycaenidae	Lepidoptera_Lycaenidae	holo	phytophagy		1		1	0	0	full	include	yes
Lepidoptera	Lymantriidae	Lepidoptera_Lymantriidae	holo	phytophagy		1		1	0	0	full	include	yes
Lepidoptera	Lyonetiidae	Lepidoptera_Lyonetiidae	holo	phytophagy		1		1	0	0	full	include	yes
Lepidoptera	Megalopygidae	Lepidoptera_Megalopygidae	holo	phytophagy		1		1	0	0	full	include	yes
Lepidoptera	Micropterigidae	Lepidoptera_Micropterigidae	holo	mixed		1		1	0	0	full	include	yes
Lepidoptera	Mimallonidae	Lepidoptera_Mimallonidae	holo	phytophagy		1		1	0	0	full	include	yes
Lepidoptera	Mirinidae	Lepidoptera_Mirinidae	holo	phytophagy		1		1	0	0	full	include	yes
Lepidoptera	Mnesarchaeidae	Lepidoptera_Mnesarchaeidae	holo	mixed		1		1	0	0	full	include	yes
Lepidoptera	Momphidae	Lepidoptera_Momphidae	holo	phytophagy		1		1	0	0	full	include	yes
Lepidoptera	Neopseustidae	Lepidoptera_Neopseustidae	holo	phytophagy		1		1	0	0	full	include	yes
Lepidoptera	Nepticulidae	Lepidoptera_Nepticulidae	holo	phytophagy		1		1	0	0	full	include	yes
Lepidoptera	Noctuidae	Lepidoptera_Noctuidae	holo	mixed		1		1	0	0	full	include	yes
Lepidoptera	Notodontidae	Lepidoptera_Notodontidae	holo	phytophagy		1		1	0	0	full	include	yes
Lepidoptera	Nymphalidae	Lepidoptera_Nymphalidae	holo	phytophagy		1		1	0	0	full	include	yes
Lepidoptera	Oecophoridae	Lepidoptera_Oecophoridae	holo	mixed		1		1	0	0	full	include	yes
Lepidoptera	Opostegidae	Lepidoptera_Opostegidae	holo	phytophagy		1		1	0	0	full	include	yes
Lepidoptera	Palaephatidae	Lepidoptera_Palaephatidae	holo	phytophagy		1		1	0	0	full	include	yes
Lepidoptera	Papilionidae	Lepidoptera_Papilionidae	holo	phytophagy		1		1	0	0	full	include	yes
Lepidoptera	Peleopodidae	Lepidoptera_Peleopodidae	holo	phytophagy		1		1	0	0	full	include	yes
Lepidoptera	Pieridae	Lepidoptera_Pieridae	holo	phytophagy		1		1	0	0	full	include	yes
Lepidoptera	Plutellidae	Lepidoptera_Plutellidae	holo	phytophagy		1		1	0	0	full	include	yes
Lepidoptera	Prodoxidae	Lepidoptera_Prodoxidae	holo	phytophagy		1		1	0	0	full	include	yes
Lepidoptera	Prototheoridae	Lepidoptera_Prototheoridae	holo	mixed		1		1	0	0	full	include	yes	Diet estimated by closest relative Hepialidae
Lepidoptera	Psychidae	Lepidoptera_Psychidae	holo	mixed		1		1	0	0	full	include	yes
Lepidoptera	Pterolonchidae	Lepidoptera_Pterolonchidae	holo	phytophagy		1		1	0	0	full	include	yes
Lepidoptera	Pterophoridae	Lepidoptera_Pterophoridae	holo	phytophagy		1		1	0	0	full	include	yes
Lepidoptera	Pyralidae	Lepidoptera_Pyralidae	holo	mixed		1		1	0	0	full	include	yes
Lepidoptera	Riodinidae	Lepidoptera_Riodinidae	holo	phytophagy		1		1	0	0	full	include	yes
Lepidoptera	Roeslerstammiidae	Lepidoptera_Roeslerstammiidae	holo	phytophagy		1		1	0	0	full	include	yes
Lepidoptera	Saturniidae	Lepidoptera_Saturniidae	holo	phytophagy		1		1	0	0	full	include	yes
Lepidoptera	Sematuridae	Lepidoptera_Sematuridae	holo	phytophagy		1		1	0	0	full	include	yes
Lepidoptera	Sesiidae	Lepidoptera_Sesiidae	holo	phytophagy		1		1	0	0	full	include	yes
Lepidoptera	Somabrachyidae	Lepidoptera_Somabrachyidae	holo	phytophagy		1		1	0	0	full	include	yes
Lepidoptera	Sphingidae	Lepidoptera_Sphingidae	holo	phytophagy		1		1	0	0	full	include	yes
Lepidoptera	Thyrididae	Lepidoptera_Thyrididae	holo	phytophagy		1		1	0	0	full	include	yes
Lepidoptera	Tineidae	Lepidoptera_Tineidae	holo	mixed		1		1	0	0	full	include	yes
Lepidoptera	Tineodidae	Lepidoptera_Tineodidae	holo	phytophagy		1		1	0	0	full	include	yes
Lepidoptera	Tischeriidae	Lepidoptera_Tischeriidae	holo	phytophagy		1		1	0	0	full	include	yes
Lepidoptera	Tortricidae	Lepidoptera_Tortricidae	holo	phytophagy		1		1	0	0	full	include	yes
Lepidoptera	Uraniidae	Lepidoptera_Uraniidae	holo	phytophagy		1		1	0	0	full	include	yes
Lepidoptera	Urodidae	Lepidoptera_Urodidae	holo	phytophagy		1		1	0	0	full	include	yes
Lepidoptera	Xyloryctidae	Lepidoptera_Xyloryctidae	holo	phytophagy		1		1	0	0	full	include	yes
Lepidoptera	Yponomeutidae	Lepidoptera_Yponomeutidae	holo	phytophagy		1		1	0	0	full	include	yes
Lepidoptera	Ypsolophidae	Lepidoptera_Ypsolophidae	holo	phytophagy		1		1	0	0	full	include	yes
Lepidoptera	Zygaenidae	Lepidoptera_Zygaenidae	holo	phytophagy		1		1	0	0	full	include	yes
Neuroptera	Ascalaphidae	Neuroptera_Ascalaphidae	holo	predatory		1		1	0	0	full	include	yes
Neuroptera	Berothidae	Neuroptera_Berothidae	holo	predatory		1		1	0	0	full	include	yes
Neuroptera	Chrysopidae	Neuroptera_Chrysopidae	holo	predatory		1		1	0	0	full	include	yes
Neuroptera	Coniopterygidae	Neuroptera_Coniopterygidae	holo	predatory		1		1	0	0	full	include	yes
Neuroptera	Hemerobiidae	Neuroptera_Hemerobiidae	holo	predatory		1		1	0	0	full	include	yes
Neuroptera	Ithonidae	Neuroptera_Ithonidae	holo	mixed		1		1	0	0	full	include	yes
Neuroptera	Mantispidae	Neuroptera_Mantispidae	holo	predatory		1		1	0	0	full	include	yes
Neuroptera	Myrmeleontidae	Neuroptera_Myrmeleontidae	holo	predatory		1		1	0	0	full	include	yes
Neuroptera	Nemopteridae	Neuroptera_Nemopteridae	holo	mixed		1		1	0	0	full	include	yes
Neuroptera	Nevrorthidae	Neuroptera_Nevrorthidae	holo	predatory		1		1	0	0	full	include	yes	Diet estimated as predatory (Grimaldi and Engel 2005)
Neuroptera	Nymphidae	Neuroptera_Nymphidae	holo	predatory		1		1	0	0	full	include	yes
Neuroptera	Osmylidae	Neuroptera_Osmylidae	holo	mixed		1		1	0	0	full	include	yes
Neuroptera	Polystoechotidae	Neuroptera_Polystoechotidae	holo	mixed		1		1	0	0	full	include	yes
Neuroptera	Psychopsidae	Neuroptera_Psychopsidae	holo	predatory		1		1	0	0	full	include	yes
Neuroptera	Sisyridae	Neuroptera_Sisyridae	holo	mixed		1		1	0	0	full	include	yes
Odonata	Aeshnidae	Odonata_Aeshnidae	hemi	predatory		1		1	0	0	full	include	yes
Odonata	Amphyipterygidae	Odonata_Amphyipterygidae	hemi	predatory		1		1	0	0	full	include	yes
Odonata	Austropetaliidae	Odonata_Austropetaliidae	hemi	predatory		1		1	0	0	full	include	yes
Odonata	Calopterygidae	Odonata_Calopterygidae	hemi	predatory		1		1	0	0	full	include	yes
Odonata	Chlorocyphidae	Odonata_Chlorocyphidae	hemi	predatory		1		1	0	0	full	include	yes
Odonata	Chlorogomphidae	Odonata_Chlorogomphidae	hemi	predatory		1		1	0	0	full	include	yes
Odonata	Chorismagrionidae	Odonata_Chorismagrionidae	hemi	predatory		1		1	0	0	full	include	yes
Odonata	Coenagrionidae	Odonata_Coenagrionidae	hemi	predatory		1		1	0	0	full	include	yes
Odonata	Cordulegastridae	Odonata_Cordulegastridae	hemi	predatory		1		1	0	0	full	include	yes
Odonata	Corduliidae	Odonata_Corduliidae	hemi	predatory		1		1	0	0	full	include	yes
Odonata	Dicteriadidae	Odonata_Dicteriadidae	hemi	predatory		1		1	0	0	full	include	yes
Odonata	Diphlebiidae	Odonata_Diphlebiidae	hemi	predatory		1		1	0	0	full	include	yes
Odonata	Epiophlebiidae	Odonata_Epiophlebiidae	hemi	predatory		1		1	0	0	full	include	yes
Odonata	Euphaeidae	Odonata_Euphaeidae	hemi	predatory		1		1	0	0	full	include	yes
Odonata	Gomphidae	Odonata_Gomphidae	hemi	predatory		1		1	0	0	full	include	yes
Odonata	Hemiphlebiidae	Odonata_Hemiphlebiidae	hemi	predatory		1		1	0	0	full	include	yes
Odonata	Isostictidae	Odonata_Isostictidae	hemi	predatory		1		1	0	0	full	include	yes
Odonata	Lestidae	Odonata_Lestidae	hemi	predatory		1		1	0	0	full	include	yes
Odonata	Libellulidae	Odonata_Libellulidae	hemi	predatory		1		1	0	0	full	include	yes
Odonata	Macromiidae	Odonata_Macromiidae	hemi	predatory		1		1	0	0	full	include	yes
Odonata	Megapodagrionidae	Odonata_Megapodagrionidae	hemi	predatory		1		1	0	0	full	include	yes
Odonata	Neopetaliidae	Odonata_Neopetaliidae	hemi	predatory		1		1	0	0	full	include	yes
Odonata	Perilestidae	Odonata_Perilestidae	hemi	predatory		1		1	0	0	full	include	yes
Odonata	Petaluridae	Odonata_Petaluridae	hemi	predatory		1		1	0	0	full	include	yes
Odonata	Platycnemididae	Odonata_Platycnemididae	hemi	predatory		1		1	0	0	full	include	yes
Odonata	Platystictidae	Odonata_Platystictidae	hemi	predatory		1		1	0	0	full	include	yes
Odonata	Polythoridae	Odonata_Polythoridae	hemi	predatory		1		1	0	0	full	include	yes
Odonata	Protoneuridae	Odonata_Protoneuridae	hemi	predatory		1		1	0	0	full	include	yes
Odonata	Pseudolestidae	Odonata_Pseudolestidae	hemi	predatory		1		1	0	0	full	include	yes
Odonata	Pseudostigmatidae	Odonata_Pseudostigmatidae	hemi	predatory		1		1	0	0	full	include	yes
Odonata	Synlestidae	Odonata_Synlestidae	hemi	predatory		1		1	0	0	full	include	yes
Odonata	Synthemistidae	Odonata_Synthemistidae	hemi	predatory		1		1	0	0	full	include	yes
Orthoptera	Acrididae	Orthoptera_Acrididae	hemi	phytophagy		1		1	0	0	full	include	yes
Orthoptera	Anostostomatidae	Orthoptera_Anostostomatidae	hemi	mixed		1		1	0	0	full	include	yes
Orthoptera	Chorotypidae	Orthoptera_Chorotypidae	hemi	phytophagy		1		1	0	0	full	include	yes
Orthoptera	Cylindrachetidae	Orthoptera_Cylindrachetidae	hemi	mixed		1		1	0	0	full	include	yes
Orthoptera	Episactidae	Orthoptera_Episactidae	hemi	phytophagy		1		1	0	0	full	include	yes
Orthoptera	Eumastacidae	Orthoptera_Eumastacidae	hemi	phytophagy		1		1	0	0	full	include	yes
Orthoptera	Euschmidtiidae	Orthoptera_Euschmidtiidae	hemi	phytophagy		1		1	0	0	full	include	yes
Orthoptera	Gryllacrididae	Orthoptera_Gryllacrididae	hemi	mixed		1		1	0	0	full	include	yes
Orthoptera	Gryllidae	Orthoptera_Gryllidae	hemi	mixed		1		1	0	0	full	include	yes
Orthoptera	Gryllotalpidae	Orthoptera_Gryllotalpidae	hemi	mixed		1		1	0	0	full	include	yes
Orthoptera	Lentulidae	Orthoptera_Lentulidae	hemi	phytophagy		1		1	0	0	full	include	yes
Orthoptera	Myrmecophilidae	Orthoptera_Myrmecophilidae	hemi	mixed		1		1	0	0	full	include	yes
Orthoptera	Pamphagidae	Orthoptera_Pamphagidae	hemi	phytophagy		1		1	0	0	full	include	yes
Orthoptera	Pneumoridae	Orthoptera_Pneumoridae	hemi	phytophagy		1		1	0	0	full	include	yes
Orthoptera	Prophalangopsidae	Orthoptera_Prophalangopsidae	hemi	phytophagy		1		1	0	0	full	include	yes
Orthoptera	Proscopiidae	Orthoptera_Proscopiidae	hemi	phytophagy		1		1	0	0	full	include	yes
Orthoptera	Pyrgomorphidae	Orthoptera_Pyrgomorphidae	hemi	phytophagy		1		1	0	0	full	include	yes
Orthoptera	Rhaphidophoridae	Orthoptera_Rhaphidophoridae	hemi	mixed		1		1	0	0	full	include	yes
Orthoptera	Rhipipterygidae	Orthoptera_Rhipipterygidae	hemi	mixed		1		1	0	0	full	include	yes	Diet estimated as mixed (Eades et al 2013)
Orthoptera	Romaleidae	Orthoptera_Romaleidae	hemi	phytophagy		1		1	0	0	full	include	yes
Orthoptera	Stenopelmatidae	Orthoptera_Stenopelmatidae	hemi	mixed		1		1	0	0	full	include	yes
Orthoptera	Tanaoceridae	Orthoptera_Tanaoceridae	hemi	mixed		1		1	0	0	full	include	yes
Orthoptera	Tetrigidae	Orthoptera_Tetrigidae	hemi	phytophagy		1		1	0	0	full	include	yes
Orthoptera	Tettigoniidae	Orthoptera_Tettigoniidae	hemi	mixed		1		1	0	0	full	include	yes
Orthoptera	Thericleidae	Orthoptera_Thericleidae	hemi	phytophagy		1		1	0	0	full	include	yes
Orthoptera	Tridactylidae	Orthoptera_Tridactylidae	hemi	mixed		1		1	0	0	full	include	yes
Orthoptera	Trigonopterygidae	Orthoptera_Trigonopterygidae	hemi	phytophagy		1		1	0	0	full	include	yes
Orthoptera	Xyronotidae	Orthoptera_Xyronotidae	hemi	phytophagy		1		1	0	0	full	include	yes
Phasmatodea	Diapheromeridae	Phasmatodea_Diapheromeridae	hemi	phytophagy	herbivory	3		3	0	0	restricted	include	yes
Phasmatodea	Heteronemiidae	Phasmatodea_Heteronemiidae	hemi	phytophagy	herbivory	1		1	0	0	restricted	include	yes
Phasmatodea	Heteropterygidae	Phasmatodea_Heteropterygidae	hemi	phytophagy	herbivory	3		3	0	0	restricted	include	yes
Phasmatodea	Phasmatidae	Phasmatodea_Phasmatidae	hemi	phytophagy	herbivory	14		14	0	0	restricted	include	yes
Phasmatodea	Phylliidae	Phasmatodea_Phylliidae	hemi	phytophagy	herbivory	4		4	0	0	restricted	include	yes
Phasmatodea	Pseudophasmatidae	Phasmatodea_Pseudophasmatidae	hemi	phytophagy	herbivory	2		2	0	0	restricted	include	yes
Phthiraptera	Echinophthiriidae	Phthiraptera_Echinophthiriidae	hemi	hematophagy	hematophagy	1		1	1	1	restricted	include	yes
Phthiraptera	Haematomyzidae	Phthiraptera_Haematomyzidae	hemi	mixed	predatory, detritivores	1		1	1	1	restricted	include	yes
Phthiraptera	Haematopinidae	Phthiraptera_Haematopinidae	hemi	hematophagy	hematophagy	3		3	3	1	restricted	exclude	yes	family added to phylogeny based on Barker et al 2003
Phthiraptera	Linognathidae	Phthiraptera_Linognathidae	hemi	hematophagy	hematophagy	1		1	1	1	restricted	include	yes
Phthiraptera	Pedicinidae	Phthiraptera_Pedicinidae	hemi	hematophagy	hematophagy	1	1	1	1	1	restricted	include	yes
Phthiraptera	Pediculidae	Phthiraptera_Pediculidae	hemi	hematophagy	hematophagy	3	3	3	3	1	restricted	include	yes
Phthiraptera	Philopteridae	Phthiraptera_Philopteridae	hemi	mixed	predatory, hematophagy	6		6	4	0.666667	restricted	include	yes
Phthiraptera	Polyplacidae	Phthiraptera_Polyplacidae	hemi	hematophagy	hematophagy	1		1	1	1	restricted	include	yes
Phthiraptera	Pthiridae	Phthiraptera_Pthiridae	hemi	hematophagy	hematophagy	1	2	2	2	1	restricted	include	yes
Phthiraptera	Trichodectidae	Phthiraptera_Trichodectidae	hemi	mixed	predatory, hematophagy	4		4	0	0	restricted	include	yes
Plecoptera	Austroperlidae	Plecoptera_Austroperlidae	hemi	mixed		1		1	0	0	full	include	yes
Plecoptera	Capniidae	Plecoptera_Capniidae	hemi	mixed		1		1	0	0	full	include	yes
Plecoptera	Chloroperlidae	Plecoptera_Chloroperlidae	hemi	mixed		1		1	0	0	full	include	yes
Plecoptera	Diamphipnoidae	Plecoptera_Diamphipnoidae	hemi	mixed		1		1	0	0	full	include	yes
Plecoptera	Eustheniidae	Plecoptera_Eustheniidae	hemi	mixed		1		1	0	0	full	include	yes
Plecoptera	Gripopterygidae	Plecoptera_Gripopterygidae	hemi	mixed		1		1	0	0	full	include	yes
Plecoptera	Leuctridae	Plecoptera_Leuctridae	hemi	mixed		1		1	0	0	full	include	yes
Plecoptera	Nemouridae	Plecoptera_Nemouridae	hemi	mixed		1		1	0	0	full	include	yes
Plecoptera	Notonemouridae	Plecoptera_Notonemouridae	hemi	mixed		1		1	0	0	full	include	yes
Plecoptera	Peltoperlidae	Plecoptera_Peltoperlidae	hemi	mixed		1		1	0	0	full	include	yes
Plecoptera	Perlidae	Plecoptera_Perlidae	hemi	predatory		1		1	0	0	full	include	yes
Plecoptera	Perlodidae	Plecoptera_Perlodidae	hemi	mixed		1		1	0	0	full	include	yes
Plecoptera	Pteronarcyidae	Plecoptera_Pteronarcyidae	hemi	mixed		1		1	0	0	full	include	yes
Plecoptera	Scopuridae	Plecoptera_Scopuridae	hemi	mixed		1		1	0	0	full	include	yes
Plecoptera	Styloperlidae	Plecoptera_Styloperlidae	hemi	mixed		1		1	0	0	full	include	yes
Plecoptera	Taeniopterygidae	Plecoptera_Taeniopterygidae	hemi	mixed		1		1	0	0	full	include	yes
Psocodea	Amphipsocidae	Psocoptera_Amphipsocidae	hemi	mixed	omnivory	1		1	0	0	restricted	include	yes
Psocodea	Archipsocidae	Psocoptera_Archipsocidae	hemi	mixed	omnivory	1		1	0	0	restricted	include	yes
Psocodea	Caeciliusidae	Psocoptera_Caeciliusidae	hemi	mixed	omnivory	1		1	0	0	restricted	include	yes
Psocodea	Ectopsocidae	Psocoptera_Ectopsocidae	hemi	mixed	omnivory	1		1	0	0	restricted	include	yes
Psocodea	Elipsocidae	Psocoptera_Elipsocidae	hemi	mixed	omnivory	3		3	0	0	restricted	include	yes
Psocodea	Lachesillidae	Psocoptera_Lachesillidae	hemi	mixed	omnivory	2		2	0	0	restricted	include	yes
Psocodea	Lepidopsocidae	Psocoptera_Lepidopsocidae	hemi	mixed	omnivory	2		2	0	0	restricted	include	yes
Psocodea	Liposcelidae	Psocoptera_Liposcelidae	hemi	mixed	omnivory	4		4	1	0.25	restricted	include	yes
Psocodea	Philotarsidae	Psocoptera_Philotarsidae	hemi	mixed	omnivory	1		1	0	0	restricted	include	yes
Psocodea	Psocidae	Psocoptera_Psocidae	hemi	mixed	omnivory	3		3	0	0	restricted	include	yes
Psocodea	Psyllipsocidae	Psocoptera_Psyllipsocidae	hemi	mixed	omnivory	2		2	0	0	restricted	include	yes
Psocodea	Stenopsocidae	Psocoptera_Stenopsocidae	hemi	mixed	omnivory	3		3	0	0	restricted	include	yes
Psocodea	Trichopsocidae	Psocoptera_Trichopsocidae	hemi	mixed	omnivory	1		1	0	0	restricted	include	yes
Psocodea	Trogiidae	Psocoptera_Trogiidae	hemi	mixed	omnivory	3		3	1	0.333333	restricted	include	yes
Siphonaptera	Pulicidae	Siphonaptera_Pulicidae	holo	mixed	omnivory, hematophagy	1		1	0	0	restricted	include	yes
Thysanoptera	Thripidae	Thysanoptera_Thripidae	holo	phytophagy	herbivory	1		1	0	0	restricted	include	yes

## Sheet: Table S2
Table S2: Data on the diets and obligant symbionts of insect species
Host phylogeny tip	Insect order	Insect family	Symbiont name	Symbiont phylogeny tip	Ob1crit - bacteriocytes	Ob2,3crit - cosegragation,fitness	Obligate symbiont	Insect genus	Insect species	Diet juvenile species	Diet adult species	Diet juvenile family	Diet adult family	Intra/extracellular	Symbiont Domain	Known defensive function	Obligate dataset	Co-phylogeny dataset	Single obligate symbiont dataset	Reference diet juvenile species	Reference diet adult species	Reference diet juvenile family	Reference diet adult family	Reference obligate criteria	Reference symbiont localisation*	Notes
Blattodea_Anaplectidae	Blattodea	Anaplectidae	Blattabacterium		yes	cosegragation	yes	Anaplecta	calosoma			detritus/leaves/meat/insects	detritus/leaves/meat/insects	intra	Prokaryota		yes	no	no			Bell et al 2007 Grimaldi and Engel 2005	Bell et al 2007 Grimaldi and Engel 2005	Arab et al 2020		Unless specified, Blattodea are considered generalist detritivores/omnivores based on Grimaldi and Engel 2005
Blattodea_Anaplectidae	Blattodea	Anaplectidae	Blattabacterium		yes	cosegragation	yes	Anaplecta	omei			detritus/leaves/meat/insects	detritus/leaves/meat/insects	intra	Prokaryota		yes	no	no			Bell et al 2007 Grimaldi and Engel 2005	Bell et al 2007 Grimaldi and Engel 2005	Arab et al 2020
Blattodea_Archotermopsidae	Blattodea	Archotermopsidae	Bacteria Protists	Spirochaete_symbiont_of_Zootermopsis_angusticollis	no (gut localised symbiont)	fitness reduction	yes	Zootermopsis	angusticollis			trophallaxis	wood	extra	Prokaryota & Eukaryota		yes	yes	no			Abe et al 2000	Abe et al 2000	Rosengaus et al 2011
Blattodea_Blaberidae	Blattodea	Blaberidae	Blattabacterium	Blattabacterium_of_Blaberus_giganteus	yes	cosegragation	yes	Galiblatta	cribrosa		detritus	detritus/leaves/meat/insects	detritus/leaves/meat/insects	intra	Prokaryota		yes	no	yes		Bell et al 2007	Bell et al 2007 Grimaldi and Engel 2005	Bell et al 2007 Grimaldi and Engel 2005	Arab et al 2020
Blattodea_Blaberidae	Blattodea	Blaberidae	Blattabacterium	Blattabacterium_of_Blaberus_giganteus	yes	cosegragation	yes	Epilampra	maya		detritus/leaves	detritus/leaves/meat/insects	detritus/leaves/meat/insects	intra	Prokaryota		yes	no	yes		Bell et al 2007	Bell et al 2007 Grimaldi and Engel 2005	Bell et al 2007 Grimaldi and Engel 2005	Arab et al 2020
Blattodea_Blaberidae	Blattodea	Blaberidae	Blattabacterium	Blattabacterium_of_Blaberus_giganteus	yes	cosegragation	yes	Macropanesthia	rhinoceros		detritus/leaves	detritus/leaves/meat/insects	detritus/leaves/meat/insects	intra	Prokaryota		yes	no	yes		Bell et al 2007	Bell et al 2007 Grimaldi and Engel 2005	Bell et al 2007 Grimaldi and Engel 2005	Arab et al 2020
Blattodea_Blaberidae	Blattodea	Blaberidae	Blattabacterium	Blattabacterium_of_Blaberus_giganteus	yes	cosegragation	yes	Eublaberus	distanti		insects	detritus/leaves/meat/insects	detritus/leaves/meat/insects	intra	Prokaryota		yes	no	yes		Bell et al 2007	Bell et al 2007 Grimaldi and Engel 2005	Bell et al 2007 Grimaldi and Engel 2005	Arab et al 2020
Blattodea_Blaberidae	Blattodea	Blaberidae	Blattabacterium	Blattabacterium_of_Blaberus_giganteus	yes	cosegragation	yes	Panchlora	nivea		nectar	detritus/leaves/meat/insects	detritus/leaves/meat/insects	intra	Prokaryota		yes	no	yes		Bell et al 2007	Bell et al 2007 Grimaldi and Engel 2005	Bell et al 2007 Grimaldi and Engel 2005	Arab et al 2020
Blattodea_Blaberidae	Blattodea	Blaberidae	Blattabacterium	Blattabacterium_of_Blaberus_giganteus	yes	cosegragation	yes	Panesthia	angustipennis		wood	detritus/leaves/meat/insects	detritus/leaves/meat/insects	intra	Prokaryota		yes	no	yes		Bell et al 2007	Bell et al 2007 Grimaldi and Engel 2005	Bell et al 2007 Grimaldi and Engel 2005	Arab et al 2020
Blattodea_Blaberidae	Blattodea	Blaberidae	Blattabacterium	Blattabacterium_of_Blaberus_giganteus	yes	cosegragation	yes	Panesthia	sp		wood	detritus/leaves/meat/insects	detritus/leaves/meat/insects	intra	Prokaryota		yes	no	yes		Bell et al 2007	Bell et al 2007 Grimaldi and Engel 2005	Bell et al 2007 Grimaldi and Engel 2005	Arab et al 2020
Blattodea_Blaberidae	Blattodea	Blaberidae	Blattabacterium	Blattabacterium_of_Blaberus_giganteus	yes	cosegragation	yes	Blaberus	giganteus		detritus/leaves	detritus/leaves/meat/insects	detritus/leaves/meat/insects	intra	Prokaryota		yes	no	yes		Huang et al 2012	Bell et al 2007 Grimaldi and Engel 2005	Bell et al 2007 Grimaldi and Engel 2005	Arab et al 2020
Blattodea_Blaberidae	Blattodea	Blaberidae	Blattabacterium	Blattabacterium_of_Blaberus_giganteus	yes	cosegragation	yes	Gromphadorhina	grandidieri	trophallaxis		detritus/leaves/meat/insects	detritus/leaves/meat/insects	intra	Prokaryota		yes	no	yes	Perry and Nalepa 2003		Bell et al 2007 Grimaldi and Engel 2005	Bell et al 2007 Grimaldi and Engel 2005	Arab et al 2020
Blattodea_Blaberidae	Blattodea	Blaberidae	Blattabacterium	Blattabacterium_of_Blaberus_giganteus	yes	cosegragation	yes	Gyna	capucina			detritus/leaves/meat/insects	detritus/leaves/meat/insects	intra	Prokaryota		yes	no	yes			Bell et al 2007 Grimaldi and Engel 2005	Bell et al 2007 Grimaldi and Engel 2005	Arab et al 2020
Blattodea_Blaberidae	Blattodea	Blaberidae	Blattabacterium	Blattabacterium_of_Blaberus_giganteus	yes	cosegragation	yes	Nauphoeta	cinerea			detritus/leaves/meat/insects	detritus/leaves/meat/insects	intra	Prokaryota		yes	no	yes			Bell et al 2007 Grimaldi and Engel 2005	Bell et al 2007 Grimaldi and Engel 2005	Arab et al 2020
Blattodea_Blaberidae	Blattodea	Blaberidae	Blattabacterium	Blattabacterium_of_Blaberus_giganteus	yes	cosegragation	yes	Paranauphoeta	circumdata			detritus/leaves/meat/insects	detritus/leaves/meat/insects	intra	Prokaryota		yes	no	yes			Bell et al 2007 Grimaldi and Engel 2005	Bell et al 2007 Grimaldi and Engel 2005	Arab et al 2020
Blattodea_Blaberidae	Blattodea	Blaberidae	Blattabacterium	Blattabacterium_of_Blaberus_giganteus	yes	cosegragation	yes	Blaptica	dubia			detritus/leaves/meat/insects	detritus/leaves/meat/insects	intra	Prokaryota		yes	no	yes			Bell et al 2007 Grimaldi and Engel 2005	Bell et al 2007 Grimaldi and Engel 2005	Arab et al 2020
Blattodea_Blaberidae	Blattodea	Blaberidae	Blattabacterium	Blattabacterium_of_Blaberus_giganteus	yes	cosegragation	yes	Pycnoscelus	femapterus			detritus/leaves/meat/insects	detritus/leaves/meat/insects	intra	Prokaryota		yes	no	yes			Bell et al 2007 Grimaldi and Engel 2005	Bell et al 2007 Grimaldi and Engel 2005	Arab et al 2020
Blattodea_Blaberidae	Blattodea	Blaberidae	Blattabacterium	Blattabacterium_of_Blaberus_giganteus	yes	cosegragation	yes	Aeluropoda	insignis			detritus/leaves/meat/insects	detritus/leaves/meat/insects	intra	Prokaryota		yes	no	yes			Bell et al 2007 Grimaldi and Engel 2005	Bell et al 2007 Grimaldi and Engel 2005	Arab et al 2020
Blattodea_Blaberidae	Blattodea	Blaberidae	Blattabacterium	Blattabacterium_of_Blaberus_giganteus	yes	cosegragation	yes	Neolaxta	mackerrasae			detritus/leaves/meat/insects	detritus/leaves/meat/insects	intra	Prokaryota		yes	no	yes			Bell et al 2007 Grimaldi and Engel 2005	Bell et al 2007 Grimaldi and Engel 2005	Arab et al 2020
Blattodea_Blaberidae	Blattodea	Blaberidae	Blattabacterium	Blattabacterium_of_Blaberus_giganteus	yes	cosegragation	yes	Opisthoplatia	orientalis			detritus/leaves/meat/insects	detritus/leaves/meat/insects	intra	Prokaryota		yes	no	yes			Bell et al 2007 Grimaldi and Engel 2005	Bell et al 2007 Grimaldi and Engel 2005	Arab et al 2020
Blattodea_Blaberidae	Blattodea	Blaberidae	Blattabacterium	Blattabacterium_of_Blaberus_giganteus	yes	cosegragation	yes	Laxta	sp			detritus/leaves/meat/insects	detritus/leaves/meat/insects	intra	Prokaryota		yes	no	yes			Bell et al 2007 Grimaldi and Engel 2005	Bell et al 2007 Grimaldi and Engel 2005	Arab et al 2020
Blattodea_Blaberidae	Blattodea	Blaberidae	Blattabacterium	Blattabacterium_of_Blaberus_giganteus	yes	cosegragation	yes	Rhabdoblatta	sp			detritus/leaves/meat/insects	detritus/leaves/meat/insects	intra	Prokaryota		yes	no	yes			Bell et al 2007 Grimaldi and Engel 2005	Bell et al 2007 Grimaldi and Engel 2005	Arab et al 2020
Blattodea_Blattidae	Blattodea	Blattidae	Blattabacterium	Blattabacterium_of_Blatta_orientalis	yes	cosegragation	yes	Blatta	orientalis			detritus/leaves/meat/insects	detritus/leaves/meat/insects	intra	Prokaryota		yes	no	yes			Bell et al 2007 Grimaldi and Engel 2005	Bell et al 2007 Grimaldi and Engel 2005	Arab et al 2020	Buchner 1965
Blattodea_Blattidae	Blattodea	Blattidae	Blattabacterium	Blattabacterium_of_Blatta_orientalis	yes	cosegragation	yes	Periplaneta	americana			detritus/leaves/meat/insects	detritus/leaves/meat/insects	intra	Prokaryota		yes	no	yes			Bell et al 2007 Grimaldi and Engel 2005	Bell et al 2007 Grimaldi and Engel 2005	Arab et al 2020	Lo et al 2007
Blattodea_Blattidae	Blattodea	Blattidae	Blattabacterium	Blattabacterium_of_Blatta_orientalis	yes	cosegragation	yes	Eurycotis	decipiens			detritus/leaves/meat/insects	detritus/leaves/meat/insects	intra	Prokaryota		yes	no	yes			Bell et al 2007 Grimaldi and Engel 2005	Bell et al 2007 Grimaldi and Engel 2005	Arab et al 2020
Blattodea_Blattidae	Blattodea	Blattidae	Blattabacterium	Blattabacterium_of_Blatta_orientalis	yes	cosegragation	yes	Shelfordella	lateralis			detritus/leaves/meat/insects	detritus/leaves/meat/insects	intra	Prokaryota		yes	no	yes			Bell et al 2007 Grimaldi and Engel 2005	Bell et al 2007 Grimaldi and Engel 2005	Arab et al 2020
Blattodea_Blattidae	Blattodea	Blattidae	Blattabacterium	Blattabacterium_of_Blatta_orientalis	yes	cosegragation	yes	Protagonista	lugubris			detritus/leaves/meat/insects	detritus/leaves/meat/insects	intra	Prokaryota		yes	no	yes			Bell et al 2007 Grimaldi and Engel 2005	Bell et al 2007 Grimaldi and Engel 2005	Arab et al 2020
Blattodea_Blattidae	Blattodea	Blattidae	Blattabacterium	Blattabacterium_of_Blatta_orientalis	yes	cosegragation	yes	Deropeltis	paulinoi			detritus/leaves/meat/insects	detritus/leaves/meat/insects	intra	Prokaryota		yes	no	yes			Bell et al 2007 Grimaldi and Engel 2005	Bell et al 2007 Grimaldi and Engel 2005	Arab et al 2020
Blattodea_Blattidae	Blattodea	Blattidae	Blattabacterium	Blattabacterium_of_Blatta_orientalis	yes	cosegragation	yes	Cosmozosteria	sp			detritus/leaves/meat/insects	detritus/leaves/meat/insects	intra	Prokaryota		yes	no	yes			Bell et al 2007 Grimaldi and Engel 2005	Bell et al 2007 Grimaldi and Engel 2005	Arab et al 2020
Blattodea_Blattidae	Blattodea	Blattidae	Blattabacterium	Blattabacterium_of_Blatta_orientalis	yes	cosegragation	yes	Melanozosteria	sp			detritus/leaves/meat/insects	detritus/leaves/meat/insects	intra	Prokaryota		yes	no	yes			Bell et al 2007 Grimaldi and Engel 2005	Bell et al 2007 Grimaldi and Engel 2005	Arab et al 2020
Blattodea_Blattidae	Blattodea	Blattidae	Blattabacterium	Blattabacterium_of_Blatta_orientalis	yes	cosegragation	yes	Methana	sp			detritus/leaves/meat/insects	detritus/leaves/meat/insects	intra	Prokaryota		yes	no	yes			Bell et al 2007 Grimaldi and Engel 2005	Bell et al 2007 Grimaldi and Engel 2005	Arab et al 2020
Blattodea_Blattidae	Blattodea	Blattidae	Blattabacterium	Blattabacterium_of_Blatta_orientalis	yes	cosegragation	yes	Platyzosteria	sp			detritus/leaves/meat/insects	detritus/leaves/meat/insects	intra	Prokaryota		yes	no	yes			Bell et al 2007 Grimaldi and Engel 2005	Bell et al 2007 Grimaldi and Engel 2005	Arab et al 2020
Blattodea_Corydiidae	Blattodea	Corydiidae	Blattabacterium	Blattabacterium_of_Polyphaga_aegyptiaca	yes	cosegragation	yes	Therea	regularis			detritus	detritus	intra	Prokaryota		yes	no	yes			Grimaldi and Engel 2005	Grimaldi and Engel 2005	Arab et al 2020
Blattodea_Corydiidae	Blattodea	Corydiidae	Blattabacterium	Blattabacterium_of_Polyphaga_aegyptiaca	yes	cosegragation	yes	Eupolyphaga	sinensis			detritus	detritus	intra	Prokaryota		yes	no	yes			Grimaldi and Engel 2005	Grimaldi and Engel 2005	Arab et al 2020
Blattodea_Cryptocercidae	Blattodea	Cryptocercidae	Blattabacterium	Blattabacterium_of_Cryptocercus_punctulatus	yes	cosegragation	yes	Cryptocercus	hirtus	wood	wood			intra	Prokaryota		yes	no	yes	Clark and Kambhampati 2003	Clark and Kambhampati 2003			Arab et al 2020
Blattodea_Cryptocercidae	Blattodea	Cryptocercidae	Blattabacterium	Blattabacterium_of_Cryptocercus_punctulatus	yes	cosegragation	yes	Cryptocercus	punctulatus	wood	wood			intra	Prokaryota		yes	no	yes	Clark and Kambhampati 2003	Clark and Kambhampati 2003			Arab et al 2020
Blattodea_Ectobiidae	Blattodea	Ectobiidae	Blattabacterium	Blattabacterium_of_Blattella_germanica	yes	cosegragation	yes	Blattella	germanica	insects/dung	detritus/leaves/meat/insects	detritus/leaves/meat/insects	detritus/leaves/meat/insects	intra	Prokaryota		yes	no	yes	Eliyahu et al 2009 Nalepa et al 2001	Rivault and Cloarec 1991	Bell et al 2007 Grimaldi and Engel 2005	Bell et al 2007 Grimaldi and Engel 2005	Arab et al 2020	Buchner 1965
Blattodea_Ectobiidae	Blattodea	Ectobiidae	Blattabacterium	Blattabacterium_of_Blattella_germanica	yes	cosegragation	yes	Parcoblatta	virginica	fungi/detritus/nectar	fungi/detritus/nectar	detritus/leaves/meat/insects	detritus/leaves/meat/insects	intra	Prokaryota		yes	no	yes	Bell et al 2007	Bell et al 2007	Bell et al 2007 Grimaldi and Engel 2005	Bell et al 2007 Grimaldi and Engel 2005	Arab et al 2020
Blattodea_Ectobiidae	Blattodea	Ectobiidae	Blattabacterium	Blattabacterium_of_Blattella_germanica	yes	cosegragation	yes	Euphyllodromia	sp		detritus/leaves	detritus/leaves/meat/insects	detritus/leaves/meat/insects	intra	Prokaryota		yes	no	yes		Bell et al 2007	Bell et al 2007 Grimaldi and Engel 2005	Bell et al 2007 Grimaldi and Engel 2005	Arab et al 2020
Blattodea_Ectobiidae	Blattodea	Ectobiidae	Blattabacterium	Blattabacterium_of_Blattella_germanica	yes	cosegragation	yes	Ectobius	sp		flowers/leaves	detritus/leaves/meat/insects	detritus/leaves/meat/insects	intra	Prokaryota		yes	no	yes		Clements et al 2013 Bell et al 2007	Bell et al 2007 Grimaldi and Engel 2005	Bell et al 2007 Grimaldi and Engel 2005	Arab et al 2020
Blattodea_Ectobiidae	Blattodea	Ectobiidae	Blattabacterium	Blattabacterium_of_Blattella_germanica	yes	cosegragation	yes	Megaloblatta	sp	wood/fungi		detritus/leaves/meat/insects	detritus/leaves/meat/insects	intra	Prokaryota		yes	no	yes	Bell et al 2007		Bell et al 2007 Grimaldi and Engel 2005	Bell et al 2007 Grimaldi and Engel 2005	Arab et al 2020
Blattodea_Ectobiidae	Blattodea	Ectobiidae	Blattabacterium	Blattabacterium_of_Blattella_germanica	yes	cosegragation	yes	Allacta	australiensis			detritus/leaves/meat/insects	detritus/leaves/meat/insects	intra	Prokaryota		yes	no	yes			Bell et al 2007 Grimaldi and Engel 2005	Bell et al 2007 Grimaldi and Engel 2005	Arab et al 2020
Blattodea_Ectobiidae	Blattodea	Ectobiidae	Blattabacterium	Blattabacterium_of_Blattella_germanica	yes	cosegragation	yes	Paratemnopteryx	couloniana			detritus/leaves/meat/insects	detritus/leaves/meat/insects	intra	Prokaryota		yes	no	yes			Bell et al 2007 Grimaldi and Engel 2005	Bell et al 2007 Grimaldi and Engel 2005	Arab et al 2020
Blattodea_Ectobiidae	Blattodea	Ectobiidae	Blattabacterium	Blattabacterium_of_Blattella_germanica	yes	cosegragation	yes	Ischnoptera	deropeltiformis			detritus/leaves/meat/insects	detritus/leaves/meat/insects	intra	Prokaryota		yes	no	yes			Bell et al 2007 Grimaldi and Engel 2005	Bell et al 2007 Grimaldi and Engel 2005	Arab et al 2020
Blattodea_Ectobiidae	Blattodea	Ectobiidae	Blattabacterium	Blattabacterium_of_Blattella_germanica	yes	cosegragation	yes	Ectoneura	hanitschi			detritus/leaves/meat/insects	detritus/leaves/meat/insects	intra	Prokaryota		yes	no	yes			Bell et al 2007 Grimaldi and Engel 2005	Bell et al 2007 Grimaldi and Engel 2005	Arab et al 2020
Blattodea_Ectobiidae	Blattodea	Ectobiidae	Blattabacterium	Blattabacterium_of_Blattella_germanica	yes	cosegragation	yes	Beybienkoa	kurandanensis			detritus/leaves/meat/insects	detritus/leaves/meat/insects	intra	Prokaryota		yes	no	yes			Bell et al 2007 Grimaldi and Engel 2005	Bell et al 2007 Grimaldi and Engel 2005	Arab et al 2020
Blattodea_Ectobiidae	Blattodea	Ectobiidae	Blattabacterium	Blattabacterium_of_Blattella_germanica	yes	cosegragation	yes	Anallacta	methanoides			detritus/leaves/meat/insects	detritus/leaves/meat/insects	intra	Prokaryota		yes	no	yes			Bell et al 2007 Grimaldi and Engel 2005	Bell et al 2007 Grimaldi and Engel 2005	Arab et al 2020
Blattodea_Ectobiidae	Blattodea	Ectobiidae	Blattabacterium	Blattabacterium_of_Blattella_germanica	yes	cosegragation	yes	Carbrunneria	paramaxi			detritus/leaves/meat/insects	detritus/leaves/meat/insects	intra	Prokaryota		yes	no	yes			Bell et al 2007 Grimaldi and Engel 2005	Bell et al 2007 Grimaldi and Engel 2005	Arab et al 2020
Blattodea_Ectobiidae	Blattodea	Ectobiidae	Blattabacterium	Blattabacterium_of_Blattella_germanica	yes	cosegragation	yes	Amazonina	sp			detritus/leaves/meat/insects	detritus/leaves/meat/insects	intra	Prokaryota		yes	no	yes			Bell et al 2007 Grimaldi and Engel 2005	Bell et al 2007 Grimaldi and Engel 2005	Arab et al 2020
Blattodea_Ectobiidae	Blattodea	Ectobiidae	Blattabacterium	Blattabacterium_of_Blattella_germanica	yes	cosegragation	yes	Balta	sp			detritus/leaves/meat/insects	detritus/leaves/meat/insects	intra	Prokaryota		yes	no	yes			Bell et al 2007 Grimaldi and Engel 2005	Bell et al 2007 Grimaldi and Engel 2005	Arab et al 2020
Blattodea_Ectobiidae	Blattodea	Ectobiidae	Blattabacterium	Blattabacterium_of_Blattella_germanica	yes	cosegragation	yes	Chorisoserrata	sp			detritus/leaves/meat/insects	detritus/leaves/meat/insects	intra	Prokaryota		yes	no	yes			Bell et al 2007 Grimaldi and Engel 2005	Bell et al 2007 Grimaldi and Engel 2005	Arab et al 2020
Blattodea_Ectobiidae	Blattodea	Ectobiidae	Blattabacterium	Blattabacterium_of_Blattella_germanica	yes	cosegragation	yes	Phyllodromica	sp			detritus/leaves/meat/insects	detritus/leaves/meat/insects	intra	Prokaryota		yes	no	yes			Bell et al 2007 Grimaldi and Engel 2005	Bell et al 2007 Grimaldi and Engel 2005	Arab et al 2020
Blattodea_Kalotermitidae	Blattodea	Kalotermitidae	Bacteria Protists														no	no	no					Abe et al 2000 Rahman et al 2015 Berlanga et al 2007
Blattodea_Lamproblattidae	Blattodea	Lamproblattidae	Blattabacterium		yes	cosegragation	yes	Lamproblatta sp.				detritus/leaves/meat/insects	detritus/leaves/meat/insects	intra	Prokaryota		yes	no	no			Bell et al 2007 Grimaldi and Engel 2005	Bell et al 2007 Grimaldi and Engel 2005	Arab et al 2020
Blattodea_Mastotermitidae	Blattodea	Mastotermitidae	Bacteria Protists														no	no	no					Abe et al 2000 Rahman et al 2015
Blattodea_Mastotermitidae	Blattodea	Mastotermitidae	Blattabacterium	Blattabacterium_of_Mastotermes_darwiniensis	yes	cosegragation	yes	Mastotermes	darwiniensis	trophallaxis	wood/detritus/leaves/meat/insects			intra	Prokaryota		yes	yes	no	Nalepa and Jones 1991	Sabree et al 2012 Hill 1942			Arab et al 2020
Blattodea_Nocticolidae	Blattodea	Nocticolidae	none known		none known		no	Nocticola	australiensis	detritus		detritus					yes	no	no	Roth 1988 from Footit		Footit and Alder 2017	Footit and Alder 2017	Lo et al 2007	Lo et al 2007	Diet not well known, based on Footit and Alder 2017
Blattodea_Nocticolidae	Blattodea	Nocticolidae	none known		none known		no	Nocticola	sp			detritus					yes	no	no			Footit and Alder 2017	Footit and Alder 2017	Lo et al 2007	Lo et al 2007	Diet not well known, based on Footit and Alder 2017
Blattodea_Nocticolidae	Blattodea	Nocticolidae	none known		none known		no	Nocticola	sp			detritus					yes	no	no			Footit and Alder 2017	Footit and Alder 2017	Lo et al 2007	Lo et al 2007	Diet not well known, based on Footit and Alder 2017
Blattodea_Rhinotermitidae	Blattodea	Rhinotermitidae	Bacteria		no (gut localised symbiont)			Coptotermes	lacteus			trophallaxis	wood	extra	Prokaryota & Eukaryota		no	no	no			Abe et al 2000	Abe et al 2000	Rahman et al 2015	Rahman et al 2015
Blattodea_Rhinotermitidae	Blattodea	Rhinotermitidae	Bacteria Protists		no (gut localised symbiont)	fitness reduction	yes	Reticulitermes	flavipes			trophallaxis	wood	extra	Prokaryota & Eukaryota		yes	no	no			Abe et al 2000	Abe et al 2000	Cleveland 1924	Cleveland 1924
Blattodea_Termitidae	Blattodea	Termitidae	Spirochaetes sp.	Spirochaete_symbiont_of_Macrotermes_michaelseni	no (gut localised symbiont)	fitness reduction	yes	Nasutitermes	exitiosus			trophallaxis	wood/leaves/detritus	extra	Prokaryota		yes	yes	yes			Abe et al 2000	Abe et al 2000	Abe et al 2000 Eutick et al 1978
Blattodea_Tryonicidae	Blattodea	Tryonicidae	Blattabacterium		yes	cosegragation	yes	Tryonicus	parvus			detritus/leaves/meat/insects	detritus/leaves/meat/insects	intra	Prokaryota		yes	no	no			Bell et al 2007 Grimaldi and Engel 2005	Bell et al 2007 Grimaldi and Engel 2005	Arab et al 2020
Coleoptera_Anobiidae	Coleoptera	Anobiidae	Symbiotaphrina kochii		yes		yes	Stegobium	paniceum			wood/seeds/leaves (galls)	wood/seeds/leaves (galls)	intra	Eukaryota		yes	no	no			Arnett et al 2010 Krenn et al 2005	Arnett et al 2010 Krenn et al 2005	Pant and Fraenkel 1950 Breitsprecher 1928 (Buchner 1965)	Breitsprecher 1928 (Buchner 1965)
Coleoptera_Anobiidae	Coleoptera	Anobiidae	Symbiotaphrina kochii		yes		yes	Lasioderma	serricorne			wood/seeds/leaves (galls)	wood/seeds/leaves (galls)	intra	Eukaryota		yes	no	no			Arnett et al 2010 Krenn et al 2005	Arnett et al 2010 Krenn et al 2005	Ermisch 1960 (Buchner 1965)	Pant and Fraenkel 1954
Coleoptera_Bostrichidae	Coleoptera	Bostrichidae	Bacteria		yes		yes	Scobicia	chevrieri			wood	wood	intra	Prokaryota		yes	no	no			Arnett et al 2010 Krenn et al 2005	Arnett et al 2010 Krenn et al 2005	Buchner 1954 (Buchner 1965)	Buchner 1954 (Buchner 1965)
Coleoptera_Bostrichidae	Coleoptera	Bostrichidae	Bacteria		yes		yes	Apate	degener			wood	wood	intra	Prokaryota		yes	no	no			Arnett et al 2010 Krenn et al 2005	Arnett et al 2010 Krenn et al 2005	Buchner 1954 (Buchner 1965)	Buchner 1954 (Buchner 1965)
Coleoptera_Bostrichidae	Coleoptera	Bostrichidae	Bacteria		yes		yes	Apate	monachus			wood	wood	intra	Prokaryota		yes	no	no			Arnett et al 2010 Krenn et al 2005	Arnett et al 2010 Krenn et al 2005	Buchner 1954 (Buchner 1965)	Buchner 1954 (Buchner 1965)
Coleoptera_Bostrichidae	Coleoptera	Bostrichidae	Bacteria		yes		yes	Sinoxylon	sexdentatus			wood	wood	intra	Prokaryota		yes	no	no			Arnett et al 2010 Krenn et al 2005	Arnett et al 2010 Krenn et al 2005	Buchner 1954 (Buchner 1965)	Buchner 1954 (Buchner 1965)
Coleoptera_Bostrichidae	Coleoptera	Bostrichidae	Bacteria		yes		yes	Prostephanus	trunctatus	wood	wood/seeds	wood	wood	intra	Prokaryota		yes	no	no	Liu et al 2008	Liu et al 2008	Arnett et al 2010 Krenn et al 2005	Arnett et al 2010 Krenn et al 2005	Kleespies et al 2001	Kleespies et al 2001
Coleoptera_Bostrichidae	Coleoptera	Bostrichidae	Bacteria		yes		yes	Lyctus	linearis			wood	wood	intra	Prokaryota		yes	no	no			Arnett et al 2010 Krenn et al 2005	Arnett et al 2010 Krenn et al 2005	Koch 1936 (Buchner 1965)	Koch 1936 (Buchner 1965)
Coleoptera_Bostrichidae	Coleoptera	Bostrichidae	Bacteria		yes		yes	Rhyzopertha	dominica	wood	wood/seeds	wood	wood	intra	Prokaryota		yes	no	no	Liu et al 2008	Liu et al 2008	Arnett et al 2010 Krenn et al 2005	Arnett et al 2010 Krenn et al 2005	Okude et al 2017	Okude et al 2017
Coleoptera_Cerambycidae	Coleoptera	Cerambycidae	Bacteria	Endosymbiont_of_unidentified_Cerambycidae_mycetome	yes		yes	Periboeum	pubescens	wood		wood	wood/leaves/pollen/seeds	intra	Prokaryota		yes	yes	yes	Berkov 1999		Arnett et al 2010 Krenn et al 2005	Arnett et al 2010 Krenn et al 2005	Calderon and Berkov 2012	Calderon and Berkov 2012
Coleoptera_Cerambycidae	Coleoptera	Cerambycidae	Bacteria	Endosymbiont_of_unidentified_Cerambycidae_mycetome	yes		yes	Xylergates	pulcher	wood		wood	wood/leaves/pollen/seeds	intra	Prokaryota		yes	yes	yes	Berkov 1999		Arnett et al 2010 Krenn et al 2005	Arnett et al 2010 Krenn et al 2005	Calderon and Berkov 2012	Calderon and Berkov 2012
Coleoptera_Cerambycidae	Coleoptera	Cerambycidae	Fungi		yes		yes	Oxymirus	cursor	wood	flowers	wood	wood/leaves/pollen/seeds	intra	Eukaryota		yes	no	no	Berkov 1999	Chinery 2012	Arnett et al 2010 Krenn et al 2005	Arnett et al 2010 Krenn et al 2005	Buchner 1928 (Buchner 1965) 1930	Buchner 1928 (Buchner 1965) 1930
Coleoptera_Cerambycidae	Coleoptera	Cerambycidae	Fungi		yes		yes	Leptura	rubra	wood	nectar/pollen	wood	wood/leaves/pollen/seeds	intra	Eukaryota		yes	no	no	Berkov 1999	Duff 2006	Arnett et al 2010 Krenn et al 2005	Arnett et al 2010 Krenn et al 2005	Buchner 1965	Buchner 1965
Coleoptera_Cerambycidae	Coleoptera	Cerambycidae	Fungi		yes		yes	Spondylis	buprestoides	wood		wood	wood/leaves/pollen/seeds	intra	Eukaryota		yes	no	no	Berkov 1999		Arnett et al 2010 Krenn et al 2005	Arnett et al 2010 Krenn et al 2005	Buchner 1965	Buchner 1965
Coleoptera_Cerambycidae	Coleoptera	Cerambycidae	Fungi		yes		yes	Harpium	mordizx	wood		wood	wood/leaves/pollen/seeds	intra	Eukaryota		yes	no	no	Berkov 1999		Arnett et al 2010 Krenn et al 2005	Arnett et al 2010 Krenn et al 2005	Buchner 1965	Buchner 1965
Coleoptera_Cerambycidae	Coleoptera	Cerambycidae	Fungi		yes		yes	Harpium	sycophanta	wood		wood	wood/leaves/pollen/seeds	intra	Eukaryota		yes	no	no	Berkov 1999		Arnett et al 2010 Krenn et al 2005	Arnett et al 2010 Krenn et al 2005	Buchner 1965	Buchner 1965
Coleoptera_Cerambycidae	Coleoptera	Cerambycidae	Fungi		yes		yes	Criocephalus	sp	wood		wood	wood/leaves/pollen/seeds	intra	Eukaryota		yes	no	no	Berkov 1999		Arnett et al 2010 Krenn et al 2005	Arnett et al 2010 Krenn et al 2005	Schoman 1937 (Buchner 1965)	Riba 1977 Schoman 1937 (Buchner 1965)
Coleoptera_Cerambycidae	Coleoptera	Cerambycidae	Fungi		yes		yes	Asemum	sp	wood		wood	wood/leaves/pollen/seeds	intra	Eukaryota		yes	no	no	Berkov 1999		Arnett et al 2010 Krenn et al 2005	Arnett et al 2010 Krenn et al 2005	Schoman 1937 (Buchner 1965)	Schoman 1937 (Buchner 1965)
Coleoptera_Cerambycidae	Coleoptera	Cerambycidae	none known		none known	not ubiquitous	no	Palame	anceps	wood		wood	wood/leaves/pollen/seeds				yes	no	no	Berkov 1999		Arnett et al 2010 Krenn et al 2005	Arnett et al 2010 Krenn et al 2005	Calderon and Berkov 2012	Calderon and Berkov 2012
Coleoptera_Cerambycidae	Coleoptera	Cerambycidae	none known		none known	not ubiquitous	no	Palame	crassimana	wood		wood	wood/leaves/pollen/seeds				yes	no	no	Berkov 1999		Arnett et al 2010 Krenn et al 2005	Arnett et al 2010 Krenn et al 2005	Calderon and Berkov 2012	Calderon and Berkov 2012
Coleoptera_Cerambycidae	Coleoptera	Cerambycidae	none known		none known	not ubiquitous	no	Palame	mimetica	wood		wood	wood/leaves/pollen/seeds				yes	no	no	Berkov 1999		Arnett et al 2010 Krenn et al 2005	Arnett et al 2010 Krenn et al 2005	Calderon and Berkov 2012	Calderon and Berkov 2012
Coleoptera_Chrysomelidae	Coleoptera	Chrysomelidae	Bacteria		yes		yes	Cassida	vibex		leaves	phloem/leaves	leaves	intra	Prokaryota		yes	no	no		Bienkowski 2009	Arnett et al 2010 Bienkowski et al 2004	Arnett et al 2010	Crowson 1981 Stammer 1936	Stammer 1936
Coleoptera_Chrysomelidae	Coleoptera	Chrysomelidae	Bacteria		yes		yes	Cassida	viridis		leaves	phloem/leaves	leaves	intra	Prokaryota		yes	no	no		Bienkowski 2009	Arnett et al 2010 Bienkowski et al 2004	Arnett et al 2010	Crowson 1981 Stammer 1936	Stammer 1936
Coleoptera_Chrysomelidae	Coleoptera	Chrysomelidae	Bacteria		yes		yes	Bromius	obscurus	phloem	leaves	phloem/leaves	leaves	intra	Prokaryota		yes	no	no	Buchner 1965	Buchner 1965	Arnett et al 2010 Bienkowski et al 2004	Arnett et al 2010	Crowson 1981 Stammer 1936	Stammer 1936
Coleoptera_Chrysomelidae	Coleoptera	Chrysomelidae	Bacteria		yes		yes	Cassida	nobilis			phloem/leaves	leaves	intra	Prokaryota		yes	no	no			Arnett et al 2010 Bienkowski et al 2004	Arnett et al 2010	Crowson 1981 Stammer 1936	Stammer 1936
Coleoptera_Chrysomelidae	Coleoptera	Chrysomelidae	Bacteria		yes		yes	Cassida	hemisphaerica	leaves	leaves	phloem/leaves	leaves	intra	Prokaryota		yes	no	no	Maw 1976	Bienkowski 2009	Arnett et al 2010 Bienkowski et al 2004	Arnett et al 2010	Stammer 1936	Stammer 1936
Coleoptera_Chrysomelidae	Coleoptera	Chrysomelidae	Bacteria (Candidatus Stammera)		yes		yes	Cassida	rubiginosa	leaves	leaves	phloem/leaves	leaves	intra	Prokaryota		yes	no	no	Majka and Lesage 2008	Majka and Lesage 2008	Arnett et al 2010 Bienkowski et al 2004	Arnett et al 2010	Crowson 1981 Crowson 1981 Stammer 1936 Salem et al 2017	Stammer 1936 Salem et al 2017
Coleoptera_Chrysomelidae	Coleoptera	Chrysomelidae	Candidatus Macropleicola		no (ceca and malphigian tubes localised symbiont)	cosegragation	yes	Donacia	semicuprea	phloem	leaves	phloem/leaves	leaves	intra	Prokaryota		yes	no	no	Bienkowski et al 2004	Bienkowski 2009	Arnett et al 2010 Bienkowski et al 2004	Arnett et al 2010	Stammer 1935	Buchner 1965
Coleoptera_Chrysomelidae	Coleoptera	Chrysomelidae	Candidatus Macropleicola		no (ceca and malphigian tubes localised symbiont)	cosegragation	yes	Donacia	cinerea	phloem	leaves	phloem/leaves	leaves	intra	Prokaryota		yes	no	no	Bienkowski et al 2004	Bienkowski 2009	Arnett et al 2010 Bienkowski et al 2004	Arnett et al 2010	Stammer 1935
Coleoptera_Chrysomelidae	Coleoptera	Chrysomelidae	Candidatus Macropleicola		no (ceca and malphigian tubes localised symbiont)	cosegragation	yes	Donacia	clavipes	phloem	leaves	phloem/leaves	leaves	intra	Prokaryota		yes	no	no	Bienkowski et al 2004	Bienkowski 2009	Arnett et al 2010 Bienkowski et al 2004	Arnett et al 2010	Stammer 1935
Coleoptera_Chrysomelidae	Coleoptera	Chrysomelidae	Candidatus Macropleicola		no (ceca and malphigian tubes localised symbiont)	cosegragation	yes	Donacia	crassipes	phloem	leaves	phloem/leaves	leaves	intra	Prokaryota		yes	no	no	Bienkowski et al 2004	Bienkowski 2009	Arnett et al 2010 Bienkowski et al 2004	Arnett et al 2010	Stammer 1935
Coleoptera_Chrysomelidae	Coleoptera	Chrysomelidae	Candidatus Macropleicola		no (ceca and malphigian tubes localised symbiont)	cosegragation	yes	Donacia	dentata	phloem	leaves	phloem/leaves	leaves	intra	Prokaryota		yes	no	no	Bienkowski et al 2004	Bienkowski 2009	Arnett et al 2010 Bienkowski et al 2004	Arnett et al 2010	Stammer 1935
Coleoptera_Chrysomelidae	Coleoptera	Chrysomelidae	Candidatus Macropleicola		no (ceca and malphigian tubes localised symbiont)	cosegragation	yes	Donacia	marginata	phloem	leaves	phloem/leaves	leaves	intra	Prokaryota		yes	no	no	Bienkowski et al 2004	Bienkowski 2009	Arnett et al 2010 Bienkowski et al 2004	Arnett et al 2010	Stammer 1935
Coleoptera_Chrysomelidae	Coleoptera	Chrysomelidae	Candidatus Macropleicola		no (ceca and malphigian tubes localised symbiont)	cosegragation	yes	Donacia	sparaganii	phloem	leaves	phloem/leaves	leaves	intra	Prokaryota		yes	no	no	Bienkowski et al 2004	Bienkowski 2009	Arnett et al 2010 Bienkowski et al 2004	Arnett et al 2010	Stammer 1935
Coleoptera_Chrysomelidae	Coleoptera	Chrysomelidae	Candidatus Macropleicola		no (ceca and malphigian tubes localised symbiont)	cosegragation	yes	Donacia	versicolorea	phloem	leaves	phloem/leaves	leaves	intra	Prokaryota		yes	no	no	Bienkowski et al 2004	Bienkowski 2009	Arnett et al 2010 Bienkowski et al 2004	Arnett et al 2010	Stammer 1935
Coleoptera_Chrysomelidae	Coleoptera	Chrysomelidae	Candidatus Macropleicola		no (ceca and malphigian tubes localised symbiont)	cosegragation	yes	Donacia	vulgaris	phloem	leaves	phloem/leaves	leaves	intra	Prokaryota		yes	no	no	Bienkowski et al 2004	Bienkowski 2009	Arnett et al 2010 Bienkowski et al 2004	Arnett et al 2010	Stammer 1935
Coleoptera_Chrysomelidae	Coleoptera	Chrysomelidae	Candidatus Macropleicola		no (ceca and malphigian tubes localised symbiont)	cosegragation	yes	Donacia	bicolor	phloem	leaves	phloem/leaves	leaves	intra	Prokaryota		yes	no	no	Bienkowski et al 2004	Bienkowski 2009	Arnett et al 2010 Bienkowski et al 2004	Arnett et al 2010	Stammer 1935
Coleoptera_Chrysomelidae	Coleoptera	Chrysomelidae	Candidatus Macropleicola		no (ceca and malphigian tubes localised symbiont)	cosegragation	yes	Plateumaris	flavipes	phloem	leaves	phloem/leaves	leaves	intra	Prokaryota		yes	no	no	Bienkowski et al 2004	Bienkowski et al 2004	Arnett et al 2010 Bienkowski et al 2004	Arnett et al 2010	Stammer 1935
Coleoptera_Chrysomelidae	Coleoptera	Chrysomelidae	Candidatus Macropleicola		no (ceca and malphigian tubes localised symbiont)	cosegragation	yes	Plateumaris	frosti	phloem	leaves	phloem/leaves	leaves	intra	Prokaryota		yes	no	no	Bienkowski et al 2004	Bienkowski et al 2004	Arnett et al 2010 Bienkowski et al 2004	Arnett et al 2010	Stammer 1935
Coleoptera_Chrysomelidae	Coleoptera	Chrysomelidae	Candidatus Macropleicola		no (ceca and malphigian tubes localised symbiont)	cosegragation	yes	Plateumaris	fulvipes	phloem	leaves	phloem/leaves	leaves	intra	Prokaryota		yes	no	no	Bienkowski et al 2004	Bienkowski et al 2004	Arnett et al 2010 Bienkowski et al 2004	Arnett et al 2010	Stammer 1935
Coleoptera_Chrysomelidae	Coleoptera	Chrysomelidae	Candidatus Macropleicola		no (ceca and malphigian tubes localised symbiont)	cosegragation	yes	Macroplea	pubipennis	phloem	leaves	phloem/leaves	leaves	intra	Prokaryota		yes	no	no	Kolch and Kubiak 2011	Kolch and Kubiak 2011	Arnett et al 2010 Bienkowski et al 2004	Arnett et al 2010	Stammer 1935
Coleoptera_Chrysomelidae	Coleoptera	Chrysomelidae	Candidatus Macropleicola		no (ceca and malphigian tubes localised symbiont)	cosegragation	yes	Donacia	impressa	phloem		phloem/leaves	leaves	intra	Prokaryota		yes	no	no	Bienkowski et al 2004		Arnett et al 2010 Bienkowski et al 2004	Arnett et al 2010	Stammer 1935
Coleoptera_Chrysomelidae	Coleoptera	Chrysomelidae	Candidatus Macropleicola		no (ceca and malphigian tubes localised symbiont)	cosegragation	yes	Neohaemonia	melscheimeri	phloem		phloem/leaves	leaves	intra	Prokaryota		yes	no	no	Bienkowski et al 2004		Arnett et al 2010 Bienkowski et al 2004	Arnett et al 2010	Stammer 1935
Coleoptera_Chrysomelidae	Coleoptera	Chrysomelidae	Candidatus Macropleicola		no (ceca and malphigian tubes localised symbiont)	cosegragation	yes	Plateumaris	metallica	phloem		phloem/leaves	leaves	intra	Prokaryota		yes	no	no	Bienkowski et al 2004		Arnett et al 2010 Bienkowski et al 2004	Arnett et al 2010	Stammer 1935
Coleoptera_Chrysomelidae	Coleoptera	Chrysomelidae	Candidatus Macropleicola		no (ceca and malphigian tubes localised symbiont)	cosegragation	yes	Neohaemonia	minnesotensis	phloem		phloem/leaves	leaves	intra	Prokaryota		yes	no	no	Bienkowski et al 2004		Arnett et al 2010 Bienkowski et al 2004	Arnett et al 2010	Stammer 1935
Coleoptera_Chrysomelidae	Coleoptera	Chrysomelidae	Candidatus Macropleicola		no (ceca and malphigian tubes localised symbiont)	cosegragation	yes	Neohaemonia	nigricornis	phloem		phloem/leaves	leaves	intra	Prokaryota		yes	no	no	Bienkowski et al 2004		Arnett et al 2010 Bienkowski et al 2004	Arnett et al 2010	Stammer 1935
Coleoptera_Chrysomelidae	Coleoptera	Chrysomelidae	Candidatus Macropleicola		no (ceca and malphigian tubes localised symbiont)	cosegragation	yes	Plateumaris	nitida	phloem		phloem/leaves	leaves	intra	Prokaryota		yes	no	no	Bienkowski et al 2004		Arnett et al 2010 Bienkowski et al 2004	Arnett et al 2010	Stammer 1935
Coleoptera_Chrysomelidae	Coleoptera	Chrysomelidae	Candidatus Macropleicola		no (ceca and malphigian tubes localised symbiont)	cosegragation	yes	Plateumaris	pursilla	phloem		phloem/leaves	leaves	intra	Prokaryota		yes	no	no	Bienkowski et al 2004		Arnett et al 2010 Bienkowski et al 2004	Arnett et al 2010	Stammer 1935
Coleoptera_Chrysomelidae	Coleoptera	Chrysomelidae	Candidatus Macropleicola		no (ceca and malphigian tubes localised symbiont)	cosegragation	yes	Plateumaris	rustica	phloem		phloem/leaves	leaves	intra	Prokaryota		yes	no	no	Bienkowski et al 2004		Arnett et al 2010 Bienkowski et al 2004	Arnett et al 2010	Stammer 1935
Coleoptera_Chrysomelidae	Coleoptera	Chrysomelidae	Candidatus Macropleicola		no (ceca and malphigian tubes localised symbiont)	cosegragation	yes	Plateumaris	sericea	phloem		phloem/leaves	leaves	intra	Prokaryota		yes	no	no	Bienkowski et al 2004		Arnett et al 2010 Bienkowski et al 2004	Arnett et al 2010	Stammer 1935
Coleoptera_Chrysomelidae	Coleoptera	Chrysomelidae	Candidatus Macropleicola		no (ceca and malphigian tubes localised symbiont)	cosegragation	yes	Plateumaris	shoemakeri	phloem		phloem/leaves	leaves	intra	Prokaryota		yes	no	no	Bienkowski et al 2004		Arnett et al 2010 Bienkowski et al 2004	Arnett et al 2010	Stammer 1935
Coleoptera_Chrysomelidae	Coleoptera	Chrysomelidae	Candidatus Macropleicola		no (ceca and malphigian tubes localised symbiont)	cosegragation	yes	Donacia	simplex	phloem		phloem/leaves	leaves	intra	Prokaryota		yes	no	no	Bienkowski et al 2004		Arnett et al 2010 Bienkowski et al 2004	Arnett et al 2010	Stammer 1935
Coleoptera_Chrysomelidae	Coleoptera	Chrysomelidae	Candidatus Macropleicola		no (ceca and malphigian tubes localised symbiont)	cosegragation	yes	Donacia	subtilis	phloem		phloem/leaves	leaves	intra	Prokaryota		yes	no	no	Bienkowski et al 2004		Arnett et al 2010 Bienkowski et al 2004	Arnett et al 2010	Stammer 1935
Coleoptera_Chrysomelidae	Coleoptera	Chrysomelidae	Candidatus Macropleicola		no (ceca and malphigian tubes localised symbiont)	cosegragation	yes	Donacia	tomentosa	phloem		phloem/leaves	leaves	intra	Prokaryota		yes	no	no	Bienkowski et al 2004		Arnett et al 2010 Bienkowski et al 2004	Arnett et al 2010	Stammer 1935
Coleoptera_Chrysomelidae	Coleoptera	Chrysomelidae	Candidatus Macropleicola		no (ceca and malphigian tubes localised symbiont)	cosegragation	yes	Donacia	caerulea			phloem/leaves	leaves	intra	Prokaryota		yes	no	no			Arnett et al 2010 Bienkowski et al 2004	Arnett et al 2010	Stammer 1935
Coleoptera_Chrysomelidae	Coleoptera	Chrysomelidae	Candidatus Macropleicola		no (ceca and malphigian tubes localised symbiont)	cosegragation	yes	Donacia	cincticornis			phloem/leaves	leaves	intra	Prokaryota		yes	no	no			Arnett et al 2010 Bienkowski et al 2004	Arnett et al 2010	Stammer 1935
Coleoptera_Chrysomelidae	Coleoptera	Chrysomelidae	Candidatus Macropleicola		no (ceca and malphigian tubes localised symbiont)	cosegragation	yes	Donacia	confluenta			phloem/leaves	leaves	intra	Prokaryota		yes	no	no			Arnett et al 2010 Bienkowski et al 2004	Arnett et al 2010	Stammer 1935
Coleoptera_Chrysomelidae	Coleoptera	Chrysomelidae	Candidatus Macropleicola		no (ceca and malphigian tubes localised symbiont)	cosegragation	yes	Donacia	distincta			phloem/leaves	leaves	intra	Prokaryota		yes	no	no			Arnett et al 2010 Bienkowski et al 2004	Arnett et al 2010	Stammer 1935
Coleoptera_Chrysomelidae	Coleoptera	Chrysomelidae	Candidatus Macropleicola		no (ceca and malphigian tubes localised symbiont)	cosegragation	yes	Donacia	fulgens			phloem/leaves	leaves	intra	Prokaryota		yes	no	no			Arnett et al 2010 Bienkowski et al 2004	Arnett et al 2010	Stammer 1935
Coleoptera_Chrysomelidae	Coleoptera	Chrysomelidae	Candidatus Macropleicola		no (ceca and malphigian tubes localised symbiont)	cosegragation	yes	Donacia	hirticollis			phloem/leaves	leaves	intra	Prokaryota		yes	no	no			Arnett et al 2010 Bienkowski et al 2004	Arnett et al 2010	Stammer 1935
Coleoptera_Chrysomelidae	Coleoptera	Chrysomelidae	Candidatus Macropleicola		no (ceca and malphigian tubes localised symbiont)	cosegragation	yes	Donacia	palmata			phloem/leaves	leaves	intra	Prokaryota		yes	no	no			Arnett et al 2010 Bienkowski et al 2004	Arnett et al 2010	Stammer 1935
Coleoptera_Chrysomelidae	Coleoptera	Chrysomelidae	Candidatus Macropleicola		no (ceca and malphigian tubes localised symbiont)	cosegragation	yes	Donacia	piscatrix			phloem/leaves	leaves	intra	Prokaryota		yes	no	no			Arnett et al 2010 Bienkowski et al 2004	Arnett et al 2010	Stammer 1935
Coleoptera_Chrysomelidae	Coleoptera	Chrysomelidae	Candidatus Macropleicola		no (ceca and malphigian tubes localised symbiont)	cosegragation	yes	Donacia	porosicollis			phloem/leaves	leaves	intra	Prokaryota		yes	no	no			Arnett et al 2010 Bienkowski et al 2004	Arnett et al 2010	Stammer 1935
Coleoptera_Chrysomelidae	Coleoptera	Chrysomelidae	Candidatus Macropleicola		no (ceca and malphigian tubes localised symbiont)	cosegragation	yes	Donacia	proxima			phloem/leaves	leaves	intra	Prokaryota		yes	no	no			Arnett et al 2010 Bienkowski et al 2004	Arnett et al 2010	Stammer 1935
Coleoptera_Chrysomelidae	Coleoptera	Chrysomelidae	Candidatus Macropleicola		no (ceca and malphigian tubes localised symbiont)	cosegragation	yes	Donacia	thalassina			phloem/leaves	leaves	intra	Prokaryota		yes	no	no			Arnett et al 2010 Bienkowski et al 2004	Arnett et al 2010	Stammer 1935
Coleoptera_Chrysomelidae	Coleoptera	Chrysomelidae	Candidatus Macropleicola appendiculatae		no (ceca and malphigian tubes localised symbiont)	cosegragation	yes	Macroplea	appendiculata	phloem	leaves	phloem/leaves	leaves	intra	Prokaryota		yes	no	no	Kolch and Kubiak 2011	Kolch and Kubiak 2011	Arnett et al 2010 Bienkowski et al 2004	Arnett et al 2010	Stammer 1935	Kölsch et al 2009
Coleoptera_Chrysomelidae	Coleoptera	Chrysomelidae	Candidatus Macropleicola muticae	Candidatus_Macropleicola_muticae	no (ceca and malphigian tubes localised symbiont)	cosegragation	yes	Macroplea	mutica	phloem	leaves	phloem/leaves	leaves	intra	Prokaryota		yes	yes	yes	Kolch and Kubiak 2011	Kolch and Kubiak 2011	Arnett et al 2010 Bienkowski et al 2004	Arnett et al 2010	Stammer 1935
Coleoptera_Chrysomelidae	Coleoptera	Chrysomelidae	none known		none known		no	Cassida	flaveola	leaves	leaves	phloem/leaves	leaves				yes	no	no	Majka and Lesage 2008	Majka and Lesage 2008	Arnett et al 2010 Bienkowski et al 2004	Arnett et al 2010	Stammer 1936	Stammer 1936
Coleoptera_Chrysomelidae	Coleoptera	Chrysomelidae	none known		none known		no	Cassida	nebulosa			phloem/leaves	leaves				yes	no	no			Arnett et al 2010 Bienkowski et al 2004	Arnett et al 2010	Stammer 1936	Stammer 1936
Coleoptera_Curculionidae	Coleoptera	Curculionidae	Candidatus Curculioniphilus	Candidatus_Curculioniphilus	yes	cosegragation	yes	Curculio	elephas			roots/leaves/seeds	leaves/flowers/fruit/seeds	intra	Prokaryota		yes	yes	yes			Hunt et al 2007	Hunt et al 2007	Merville et al 2013
Coleoptera_Curculionidae	Coleoptera	Curculionidae	Candidatus Curculioniphilus	Candidatus_Curculioniphilus	yes	cosegragation	yes	Curculio	glandium			roots/leaves/seeds	leaves/flowers/fruit/seeds	intra	Prokaryota		yes	yes	yes			Hunt et al 2007	Hunt et al 2007	Merville et al 2013
Coleoptera_Curculionidae	Coleoptera	Curculionidae	Candidatus Curculioniphilus	Candidatus_Curculioniphilus	yes	cosegragation	yes	Curculio	pellitus			roots/leaves/seeds	leaves/flowers/fruit/seeds	intra	Prokaryota		yes	yes	yes			Hunt et al 2007	Hunt et al 2007	Merville et al 2013
Coleoptera_Curculionidae	Coleoptera	Curculionidae	Candidatus Curculioniphilus	Candidatus_Curculioniphilus	yes	cosegragation	yes	Curculio	venosus			roots/leaves/seeds	leaves/flowers/fruit/seeds	intra	Prokaryota		yes	yes	yes			Hunt et al 2007	Hunt et al 2007	Merville et al 2013
Coleoptera_Curculionidae	Coleoptera	Curculionidae	Candidatus Curculioniphilus	Candidatus_Curculioniphilus	yes	cosegragation	yes	Curculio	sikkimensis		seeds	roots/leaves/seeds	leaves/flowers/fruit/seeds	intra	Prokaryota		yes	yes	yes		Toju et al 2013	Hunt et al 2007	Hunt et al 2007	Toju et al 2013	Toju et al 2010
Coleoptera_Curculionidae	Coleoptera	Curculionidae	Candidatus Curculioniphilus	Candidatus_Curculioniphilus	yes	cosegragation	yes	Curculio	camelliae	seeds	seeds	roots/leaves/seeds	leaves/flowers/fruit/seeds	intra	Prokaryota		yes	yes	yes	Toju et al 2013	Toju et al 2013	Hunt et al 2007	Hunt et al 2007	Toju et al 2013
Coleoptera_Curculionidae	Coleoptera	Curculionidae	Candidatus Curculioniphilus	Candidatus_Curculioniphilus	yes	cosegragation	yes	Curculio	convexus	seeds	seeds	roots/leaves/seeds	leaves/flowers/fruit/seeds	intra	Prokaryota		yes	yes	yes	Toju et al 2013	Toju et al 2013	Hunt et al 2007	Hunt et al 2007	Toju et al 2013
Coleoptera_Curculionidae	Coleoptera	Curculionidae	Candidatus Curculioniphilus	Candidatus_Curculioniphilus	yes	cosegragation	yes	Curculio	robustus	seeds	seeds	roots/leaves/seeds	leaves/flowers/fruit/seeds	intra	Prokaryota		yes	yes	yes	Toju et al 2013	Toju et al 2013	Hunt et al 2007	Hunt et al 2007	Toju et al 2013
Coleoptera_Curculionidae	Coleoptera	Curculionidae	Candidatus Curculioniphilus	Candidatus_Curculioniphilus	yes	cosegragation	yes	Curculio	sp	seeds	seeds	roots/leaves/seeds	leaves/flowers/fruit/seeds	intra	Prokaryota		yes	yes	yes	Toju et al 2013	Toju et al 2013	Hunt et al 2007	Hunt et al 2007	Toju et al 2013
Coleoptera_Curculionidae	Coleoptera	Curculionidae	Candidatus Curculioniphilus	Candidatus_Curculioniphilus	yes	cosegragation	yes	Curculio	breviscapus		fruit	roots/leaves/seeds	leaves/flowers/fruit/seeds	intra	Prokaryota		yes	yes	yes		Toju et al 2013	Hunt et al 2007	Hunt et al 2007	Toju et al 2013
Coleoptera_Curculionidae	Coleoptera	Curculionidae	Candidatus Curculioniphilus	Candidatus_Curculioniphilus	yes	cosegragation	yes	Curculio	funebris		fruit	roots/leaves/seeds	leaves/flowers/fruit/seeds	intra	Prokaryota		yes	yes	yes		Toju et al 2013	Hunt et al 2007	Hunt et al 2007	Toju et al 2013
Coleoptera_Curculionidae	Coleoptera	Curculionidae	Candidatus Curculioniphilus	Candidatus_Curculioniphilus	yes	cosegragation	yes	Curculio	hirashimai		fruit	roots/leaves/seeds	leaves/flowers/fruit/seeds	intra	Prokaryota		yes	yes	yes		Toju et al 2013	Hunt et al 2007	Hunt et al 2007	Toju et al 2013
Coleoptera_Curculionidae	Coleoptera	Curculionidae	Candidatus Curculioniphilus	Candidatus_Curculioniphilus	yes	cosegragation	yes	Shigizo	rhombiformis		fruit	roots/leaves/seeds	leaves/flowers/fruit/seeds	intra	Prokaryota		yes	yes	yes		Toju et al 2013	Hunt et al 2007	Hunt et al 2007	Toju et al 2013
Coleoptera_Curculionidae	Coleoptera	Curculionidae	Candidatus Curculioniphilus	Candidatus_Curculioniphilus	yes	cosegragation	yes	Archarius	albovittatus		leaves (galls)	roots/leaves/seeds	leaves/flowers/fruit/seeds	intra	Prokaryota		yes	yes	yes		Toju et al 2013	Hunt et al 2007	Hunt et al 2007	Toju et al 2013
Coleoptera_Curculionidae	Coleoptera	Curculionidae	Candidatus Curculioniphilus	Candidatus_Curculioniphilus	yes	cosegragation	yes	Koreoculio	antennatus		leaves (galls)	roots/leaves/seeds	leaves/flowers/fruit/seeds	intra	Prokaryota		yes	yes	yes		Toju et al 2013	Hunt et al 2007	Hunt et al 2007	Toju et al 2013
Coleoptera_Curculionidae	Coleoptera	Curculionidae	Candidatus Curculioniphilus	Candidatus_Curculioniphilus	yes	cosegragation	yes	Koreoculio	minutissimus		leaves (galls)	roots/leaves/seeds	leaves/flowers/fruit/seeds	intra	Prokaryota		yes	yes	yes		Toju et al 2013	Hunt et al 2007	Hunt et al 2007	Toju et al 2013
Coleoptera_Curculionidae	Coleoptera	Curculionidae	Candidatus Curculioniphilus	Candidatus_Curculioniphilus	yes	cosegragation	yes	Archarius	murakamii		leaves (galls)	roots/leaves/seeds	leaves/flowers/fruit/seeds	intra	Prokaryota		yes	yes	yes		Toju et al 2013	Hunt et al 2007	Hunt et al 2007	Toju et al 2013
Coleoptera_Curculionidae	Coleoptera	Curculionidae	Candidatus Curculioniphilus	Candidatus_Curculioniphilus	yes	cosegragation	yes	Archarius	parasiticus		leaves (galls)	roots/leaves/seeds	leaves/flowers/fruit/seeds	intra	Prokaryota		yes	yes	yes		Toju et al 2013	Hunt et al 2007	Hunt et al 2007	Toju et al 2013
Coleoptera_Curculionidae	Coleoptera	Curculionidae	Candidatus Curculioniphilus	Candidatus_Curculioniphilus	yes	cosegragation	yes	Archarius	pictus		leaves (galls)	roots/leaves/seeds	leaves/flowers/fruit/seeds	intra	Prokaryota		yes	yes	yes		Toju et al 2013	Hunt et al 2007	Hunt et al 2007	Toju et al 2013
Coleoptera_Curculionidae	Coleoptera	Curculionidae	Candidatus Curculioniphilus	Candidatus_Curculioniphilus	yes	cosegragation	yes	Archarius	roelofsi		leaves (galls)	roots/leaves/seeds	leaves/flowers/fruit/seeds	intra	Prokaryota		yes	yes	yes		Toju et al 2013	Hunt et al 2007	Hunt et al 2007	Toju et al 2013
Coleoptera_Curculionidae	Coleoptera	Curculionidae	Candidatus Curculioniphilus	Candidatus_Curculioniphilus	yes	cosegragation	yes	Curculio	dentipes		seeds	roots/leaves/seeds	leaves/flowers/fruit/seeds	intra	Prokaryota		yes	yes	yes		Toju et al 2013	Hunt et al 2007	Hunt et al 2007	Toju et al 2013
Coleoptera_Curculionidae	Coleoptera	Curculionidae	Candidatus Curculioniphilus	Candidatus_Curculioniphilus	yes	cosegragation	yes	Curculio	distinguendus		seeds	roots/leaves/seeds	leaves/flowers/fruit/seeds	intra	Prokaryota		yes	yes	yes		Toju et al 2013	Hunt et al 2007	Hunt et al 2007	Toju et al 2013
Coleoptera_Curculionidae	Coleoptera	Curculionidae	Candidatus Curculioniphilus	Candidatus_Curculioniphilus	yes	cosegragation	yes	Curculio	elaeagni		seeds	roots/leaves/seeds	leaves/flowers/fruit/seeds	intra	Prokaryota		yes	yes	yes		Toju et al 2013	Hunt et al 2007	Hunt et al 2007	Toju et al 2013
Coleoptera_Curculionidae	Coleoptera	Curculionidae	Candidatus Curculioniphilus	Candidatus_Curculioniphilus	yes	cosegragation	yes	Curculio	hilgendorfi		seeds	roots/leaves/seeds	leaves/flowers/fruit/seeds	intra	Prokaryota		yes	yes	yes		Toju et al 2013	Hunt et al 2007	Hunt et al 2007	Toju et al 2013
Coleoptera_Curculionidae	Coleoptera	Curculionidae	Candidatus Curculioniphilus	Candidatus_Curculioniphilus	yes	cosegragation	yes	Curculio	styracis		seeds	roots/leaves/seeds	leaves/flowers/fruit/seeds	intra	Prokaryota		yes	yes	yes		Toju et al 2013	Hunt et al 2007	Hunt et al 2007	Toju et al 2013
Coleoptera_Curculionidae	Coleoptera	Curculionidae	Candidatus Curculioniphilus	Candidatus_Curculioniphilus	yes	cosegragation	yes	Curculio	yanoi		seeds	roots/leaves/seeds	leaves/flowers/fruit/seeds	intra	Prokaryota		yes	yes	yes		Toju et al 2013	Hunt et al 2007	Hunt et al 2007	Toju et al 2013
Coleoptera_Curculionidae	Coleoptera	Curculionidae	Candidatus Curculioniphilus	Candidatus_Curculioniphilus	yes	cosegragation	yes	Curculio	aino			roots/leaves/seeds	leaves/flowers/fruit/seeds	intra	Prokaryota		yes	yes	yes			Hunt et al 2007	Hunt et al 2007	Toju et al 2013
Coleoptera_Curculionidae	Coleoptera	Curculionidae	Candidatus Curculioniphilus	Candidatus_Curculioniphilus	yes	cosegragation	yes	Carponinus	hilaris			roots/leaves/seeds	leaves/flowers/fruit/seeds	intra	Prokaryota		yes	yes	yes			Hunt et al 2007	Hunt et al 2007	Toju et al 2013
Coleoptera_Curculionidae	Coleoptera	Curculionidae	Candidatus Curculioniphilus	Candidatus_Curculioniphilus	yes	cosegragation	yes	Curculio	kojimai			roots/leaves/seeds	leaves/flowers/fruit/seeds	intra	Prokaryota		yes	yes	yes			Hunt et al 2007	Hunt et al 2007	Toju et al 2013
Coleoptera_Curculionidae	Coleoptera	Curculionidae	Candidatus Curculioniphilus	Candidatus_Curculioniphilus	yes	cosegragation	yes	Curculionini	sp			roots/leaves/seeds	leaves/flowers/fruit/seeds	intra	Prokaryota		yes	yes	yes			Hunt et al 2007	Hunt et al 2007	Toju et al 2013
Coleoptera_Curculionidae	Coleoptera	Curculionidae	Candidatus Nardonella	Nardonella_of_Euscepes_postfasciatus	yes	cosegragation	yes	Metamasius	hemipterus	wood (stems)	wood (stems)	roots/leaves/seeds	leaves/flowers/fruit/seeds	intra	Prokaryota		yes	yes	yes	Lefèvre et al 2004	Lefèvre et al 2004	Hunt et al 2007	Hunt et al 2007	Lefrèvre et al 2004	Lefrèvre et al 2004
Coleoptera_Curculionidae	Coleoptera	Curculionidae	Candidatus Nardonella	Nardonella_of_Euscepes_postfasciatus	yes	cosegragation	yes	Cosmopolites	sordidus	root	wood	roots/leaves/seeds	leaves/flowers/fruit/seeds	intra	Prokaryota		yes	yes	yes	Lefèvre et al 2004	Lefèvre et al 2004	Hunt et al 2007	Hunt et al 2007	Lefrèvre et al 2004
Coleoptera_Curculionidae	Coleoptera	Curculionidae	Candidatus Nardonella	Nardonella_of_Euscepes_postfasciatus	yes	cosegragation	yes	Metamasius	callizona	wood (stems)	wood (stems)	roots/leaves/seeds	leaves/flowers/fruit/seeds	intra	Prokaryota		yes	yes	yes	Lefèvre et al 2004	Lefèvre et al 2004	Hunt et al 2007	Hunt et al 2007	Lefrèvre et al 2004
Coleoptera_Curculionidae	Coleoptera	Curculionidae	Candidatus Nardonella	Nardonella_of_Euscepes_postfasciatus	yes	cosegragation	yes	Scyphophorus	yuccae		wood	roots/leaves/seeds	leaves/flowers/fruit/seeds	intra	Prokaryota		yes	yes	yes		Lefèvre et al 2004	Hunt et al 2007	Hunt et al 2007	Lefrèvre et al 2004
Coleoptera_Curculionidae	Coleoptera	Curculionidae	Candidatus Nardonella	Nardonella_of_Euscepes_postfasciatus	yes	cosegragation	yes	Sphenophorus	abbreviata	root		roots/leaves/seeds	leaves/flowers/fruit/seeds	intra	Prokaryota		yes	yes	yes	Lefèvre et al 2004		Hunt et al 2007	Hunt et al 2007	Lefrèvre et al 2004
Coleoptera_Curculionidae	Coleoptera	Curculionidae	Candidatus Nardonella	Nardonella_of_Euscepes_postfasciatus	yes	cosegragation	yes	Rhynchophorus	palmarum	wood (stems)		roots/leaves/seeds	leaves/flowers/fruit/seeds	intra	Prokaryota		yes	yes	yes	Lefèvre et al 2004		Hunt et al 2007	Hunt et al 2007	Lefrèvre et al 2004
Coleoptera_Curculionidae	Coleoptera	Curculionidae	Enterobacteriaceae		yes		yes	Trigonotarsus	rugosus	wood		roots/leaves/seeds	leaves/flowers/fruit/seeds	intra	Prokaryota		yes	no	no	Lefèvre et al 2004		Hunt et al 2007	Hunt et al 2007	Lefrèvre et al 2004	Lefrèvre et al 2004
Coleoptera_Curculionidae	Coleoptera	Curculionidae	Enterobacteriaceae		yes		yes	Sitophilus	granarius	seeds	seeds	roots/leaves/seeds	leaves/flowers/fruit/seeds	intra	Prokaryota		yes	no	no	Lefèvre et al 2004	Lefèvre et al 2004	Hunt et al 2007	Hunt et al 2007	Lefrèvre et al 2004
Coleoptera_Curculionidae	Coleoptera	Curculionidae	Enterobacteriaceae		yes		yes	Sitophilus	oryzae	seeds	seeds	roots/leaves/seeds	leaves/flowers/fruit/seeds	intra	Prokaryota		yes	no	no	Lefèvre et al 2004	Lefèvre et al 2004	Hunt et al 2007	Hunt et al 2007	Lefrèvre et al 2004
Coleoptera_Curculionidae	Coleoptera	Curculionidae	Enterobacteriaceae		yes		yes	Dynamis	borassi	wood (stems)		roots/leaves/seeds	leaves/flowers/fruit/seeds	intra	Prokaryota		yes	no	no	Lefèvre et al 2004		Hunt et al 2007	Hunt et al 2007	Lefrèvre et al 2004
Coleoptera_Curculionidae	Coleoptera	Curculionidae	Enterobacteriaceae		yes		yes	Rhynchophorus	ferrugineus	wood (stems)		roots/leaves/seeds	leaves/flowers/fruit/seeds	intra	Prokaryota		yes	no	no	Lefèvre et al 2004		Hunt et al 2007	Hunt et al 2007	Lefrèvre et al 2004
Coleoptera_Curculionidae	Coleoptera	Curculionidae	Enterobacteriaceae		yes		yes	Yuccaborus	frontalis	wood (stems)		roots/leaves/seeds	leaves/flowers/fruit/seeds	intra	Prokaryota		yes	no	no	Lefèvre et al 2004		Hunt et al 2007	Hunt et al 2007	Lefrèvre et al 2004
Coleoptera_Curculionidae	Coleoptera	Curculionidae	Enterobacteriaceae		yes		yes	Diocalandra	frumenti	wood (stems)		roots/leaves/seeds	leaves/flowers/fruit/seeds	intra	Prokaryota		yes	no	no	Lefèvre et al 2004		Hunt et al 2007	Hunt et al 2007	Lefrèvre et al 2004
Coleoptera_Curculionidae	Coleoptera	Curculionidae	none known		none known	not ubiquitous	no	Sitophilus	linearis	seeds	seeds	roots/leaves/seeds	leaves/flowers/fruit/seeds				yes	no	no	Lefèvre et al 2004	Lefèvre et al 2004	Hunt et al 2007	Hunt et al 2007	Lefrèvre et al 2004	Lefrèvre et al 2004
Coleoptera_Curculionidae	Coleoptera	Curculionidae	Sodalis-like symbiont	Symbiont_of_Sitophilus_zeamais	yes		yes	Sitophilus	rugicollis	seeds	seeds	roots/leaves/seeds	leaves/flowers/fruit/seeds	intra	Prokaryota		yes	yes	yes	Lefèvre et al 2004	Lefèvre et al 2004	Hunt et al 2007	Hunt et al 2007	Lefrèvre et al 2004
Coleoptera_Curculionidae	Coleoptera	Curculionidae	Sodalis-like symbiont	Symbiont_of_Sitophilus_zeamais	yes		yes	Sitophilus	zeamais	seeds	seeds	roots/leaves/seeds	leaves/flowers/fruit/seeds	intra	Prokaryota		yes	yes	yes	Lefèvre et al 2004	Lefèvre et al 2004	Hunt et al 2007	Hunt et al 2007	Lefrèvre et al 2004
Coleoptera_Curculionidae	Coleoptera	Curculionidae	Sodalis-like symbiont	Symbiont_of_Sitophilus_zeamais	yes		yes	Sitophilus	vateriae		seeds	roots/leaves/seeds	leaves/flowers/fruit/seeds	intra	Prokaryota		yes	yes	yes		Lefèvre et al 2004	Hunt et al 2007	Hunt et al 2007	Lefrèvre et al 2004
Coleoptera_Curculionidae	Coleoptera	Curculionidae	Sodalis-like symbiont	Symbiont_of_Sitophilus_zeamais	yes		yes	Sipalinus	gigas	wood (stems)		roots/leaves/seeds	leaves/flowers/fruit/seeds	intra	Prokaryota		yes	yes	yes	Lefèvre et al 2004		Hunt et al 2007	Hunt et al 2007	Lefrèvre et al 2004
Coleoptera_Laemophloeidae	Coleoptera	Laemophloeidae	none known		none known		no	Laemophloeus	ferrugineus			fungi	fungi				yes	no	no			Arnett et al 2010	Arnett et al 2010	Buchner 1965	Buchner 1965
Coleoptera_Melyridae	Coleoptera	Melyridae	Candidatus Dasytiphilus stammeri	Candidatus_Dasytiphilus	yes		yes	Dasytes	plumbeus			insects	pollen/insects	intra	Prokaryota		yes	yes	yes			Weiss and Kaltenpoth 2016 Hunt et al 2007 Arnett et al 2010	Weiss and Kaltenpoth 2016 Hunt et al 2007 Arnett et al 2010	Weiss and Kaltenpoth 2016	Weiss and Kaltenpoth 2016
Coleoptera_Melyridae	Coleoptera	Melyridae	Candidatus Dasytiphilus stammeri	Candidatus_Dasytiphilus	yes		yes	Dasytes	virens			insects	pollen/insects	intra	Prokaryota		yes	yes	yes			Weiss and Kaltenpoth 2016 Hunt et al 2007 Arnett et al 2010	Weiss and Kaltenpoth 2016 Hunt et al 2007 Arnett et al 2010	Weiss and Kaltenpoth 2016	Weiss and Kaltenpoth 2016
Coleoptera_Nosodendridae	Coleoptera	Nosodendridae	Bacteroidetes		yes		yes	Nosodendron	asiaticum			fungi/phloem	fungi/phloem/insects	intra	Prokaryota		yes	no	no			Hirota et al 2020 Resh and Cardé 2009	Hirota et al 2020 Resh and Cardé 2009	Hirato et al 2021	Hirato et al 2021
Coleoptera_Nosodendridae	Coleoptera	Nosodendridae	Bacteroidetes		yes		yes	Nosodendron	coenosum			fungi/phloem	fungi/phloem/insects	intra	Prokaryota		yes	no	no			Hirota et al 2020 Resh and Cardé 2009	Hirota et al 2020 Resh and Cardé 2009	Hirato et al 2021	Hirato et al 2021
Coleoptera_Scarabaeidae	Coleoptera	Scarabaeidae	none known			not ubiquitous	no	Onthophagus	taurus	dung	dung						yes	no	no	Hunt et al 1999	Arnett et all 2010			Estes et al 2013
Coleoptera_Scarabaeidae	Coleoptera	Scarabaeidae	none known			not ubiquitous	no	Pachysoma	endroedyi	detritus	detritus						yes	no	no	Scholtz et al 2004	Franzini et al 2016			Franzini et al 2016
Coleoptera_Scarabaeidae	Coleoptera	Scarabaeidae	none known			not ubiquitous	no	Pachysoma	striatum	dung	dung						yes	no	no	Scholtz et al 2004	Franzini et al 2016			Franzini et al 2016
Coleoptera_Silvanidae	Coleoptera	Silvanidae	Bacteria		yes		yes	Oryzaephilus	surinamensis	seeds	seeds	fungi/seeds	fungi/seeds	intra	Prokaryota		yes	no	no	Back 1926	Back 1926	Leschen et al 2010	Arnett et al 2010	Koch 1936 (Buchner 1965) Hirota et al 2017	Koch 1936 (Buchner 1965) Buchner 1965
Coleoptera_Silvanidae	Coleoptera	Silvanidae	none known		none known		no	Uleiota	sp	fungi	fungi	fungi/seeds	fungi/seeds				yes	no	no	Majka 2008	Majka 2008	Leschen et al 2010	Arnett et al 2010	Buchner 1965	Buchner 1965
Coleoptera_Silvanidae	Coleoptera	Silvanidae	none known		none known		no	Silvanus	unidentatus		fungi	fungi/seeds	fungi/seeds				yes	no	no		Majka 2008	Leschen et al 2010	Arnett et al 2010	Buchner 1965	Buchner 1965
Coleoptera_Throscidae	Coleoptera	Throscidae	Bacteria		yes		yes	Throscus	dermestoides			fungi	pollen	intra	Prokaryota		yes	no	no			Arnett et al 2010	Arnett et al 2010	Stammer 1933 (Buchner 1965)	Stammer 1933 (Buchner 1965)
Diptera_Ceratopogonidae	Diptera	Ceratopogonidae	Bacteria		yes		yes	Dasyhelea	versicolor	algae/detritus	nectar/fruit			intra	Prokaryota		yes	no	no	Keilin 1921	Martinez et al 2010			Buchner 1930 (Buchner 1965)	Buchner 1930 (Buchner 1965)
Diptera_Ceratopogonidae	Diptera	Ceratopogonidae	Bacteria		yes		yes	Dasyhelea	obscura	phloem	nectar/fruit			intra	Prokaryota		yes	no	no	Keilin 1921	Martinez et al 2010			Keilin 1921	Buchner 1930 (Buchner 1965)
Diptera_Ceratopogonidae	Diptera	Ceratopogonidae	none known		none known		no	Dasyhelea	longipalpis	algae	nectar/fruit						yes	no	no	Rieth 1915	Martinez et al 2010			Buchner 1930 (Buchner 1965)	Buchner 1930 (Buchner 1965)
Diptera_Culicidae	Diptera	Culicidae	none known		none known		no	gen	sp			algae/detritus/insects	nectar/blood				yes	no	no			Marshall 2012	Marshall 2012	Buchner 1965	Buchner 1965
Diptera_Drosophilidae	Diptera	Drosophilidae			none known		no	Drosophila	sp			fungi	nectar/fungi	intra			yes	no	no			Begon 1982	Marshall 2012	Buchner 1965	Buchner 1965
Diptera_Drosophilidae	Diptera	Drosophilidae	Spiroplasma			not ubiquitous	no	Drosophila	neotestacea			fungi	nectar/fungi		Prokaryota	yes	no	no	no			Begon 1982	Marshall 2012	Jaenike et al 2010
Diptera_Drosophilidae	Diptera	Drosophilidae	Wolbachia			not ubiquitous	no	Drosophila	melanogaster			fungi	nectar/fungi	intra	Prokaryota	yes	no	no	no			Begon 1982	Marshall 2012	Teixeira et al 2008 Hamilton and Perlman 2013
Diptera_Glossinidae	Diptera	Glossinidae	S-symbiont (Glossinidae)			not ubiquitous	no	Glossina	austeni			nonfeeding	blood	extra	Prokaryota		no	no	no			Marshall 2012	Marshall 2012	Aksoy et al 1997	Aksoy et al 1997
Diptera_Glossinidae	Diptera	Glossinidae	S-symbiont (Glossinidae)			not ubiquitous	no	Glossina	brevipalpis			nonfeeding	blood	extra	Prokaryota		no	no	no			Marshall 2012	Marshall 2012	Aksoy et al 1997	Aksoy et al 1997
Diptera_Glossinidae	Diptera	Glossinidae	S-symbiont (Glossinidae)			not ubiquitous	no	Glossina	fuscipes			nonfeeding	blood	extra	Prokaryota		no	no	no			Marshall 2012	Marshall 2012	Aksoy et al 1997	Aksoy et al 1997
Diptera_Glossinidae	Diptera	Glossinidae	S-symbiont (Glossinidae)			not ubiquitous	no	Glossina	morsitans			nonfeeding	blood	extra	Prokaryota		no	no	no			Marshall 2012	Marshall 2012	Aksoy et al 1997	Aksoy et al 1997
Diptera_Glossinidae	Diptera	Glossinidae	S-symbiont (Glossinidae)			not ubiquitous	no	Glossina	palpalis			nonfeeding	blood	extra	Prokaryota		no	no	no			Marshall 2012	Marshall 2012	Aksoy et al 1997	Aksoy et al 1997
Diptera_Glossinidae	Diptera	Glossinidae	Wigglesworthia glossinidia	Wigglesworthia_glossinidia_of_Glossina_morsitans	yes	cosegragation	yes	Glossina	palpalis			nonfeeding	blood	intra	Prokaryota		yes	yes	yes			Marshall 2012	Marshall 2012	Chen et al 1999	Buchner 1965
Diptera_Glossinidae	Diptera	Glossinidae	Wigglesworthia glossinidia	Wigglesworthia_glossinidia_of_Glossina_morsitans	yes	cosegragation	yes	Glossina	tachinoides			nonfeeding	blood	intra	Prokaryota		yes	yes	yes			Marshall 2012	Marshall 2012	Chen et al 1999	Buchner 1965
Diptera_Glossinidae	Diptera	Glossinidae	Wigglesworthia glossinidia	Wigglesworthia_glossinidia_of_Glossina_morsitans	yes	cosegragation	yes	Glossina	austeni			nonfeeding	blood	intra	Prokaryota		yes	yes	yes			Marshall 2012	Marshall 2012	Chen et al 1999
Diptera_Glossinidae	Diptera	Glossinidae	Wigglesworthia glossinidia	Wigglesworthia_glossinidia_of_Glossina_morsitans	yes	cosegragation	yes	Glossina	brevipalpis			nonfeeding	blood	intra	Prokaryota		yes	yes	yes			Marshall 2012	Marshall 2012	Chen et al 1999
Diptera_Glossinidae	Diptera	Glossinidae	Wigglesworthia glossinidia	Wigglesworthia_glossinidia_of_Glossina_morsitans	yes	cosegragation	yes	Glossina	centralis			nonfeeding	blood	intra	Prokaryota		yes	yes	yes			Marshall 2012	Marshall 2012	Chen et al 1999
Diptera_Glossinidae	Diptera	Glossinidae	Wigglesworthia glossinidia	Wigglesworthia_glossinidia_of_Glossina_morsitans	yes	cosegragation	yes	Glossina	fuscipes			nonfeeding	blood	intra	Prokaryota		yes	yes	yes			Marshall 2012	Marshall 2012	Chen et al 1999
Diptera_Glossinidae	Diptera	Glossinidae	Wigglesworthia glossinidia	Wigglesworthia_glossinidia_of_Glossina_morsitans	yes	cosegragation	yes	Glossina	gambiensis			nonfeeding	blood	intra	Prokaryota		yes	yes	yes			Marshall 2012	Marshall 2012	Chen et al 1999
Diptera_Glossinidae	Diptera	Glossinidae	Wigglesworthia glossinidia	Wigglesworthia_glossinidia_of_Glossina_morsitans	yes	cosegragation	yes	Glossina	morsitans			nonfeeding	blood	intra	Prokaryota		yes	yes	yes			Marshall 2012	Marshall 2012	Chen et al 1999
Diptera_Hippoboscidae	Diptera	Hippoboscidae	ALO-3			cosegragation	yes	Ornithomya	biloba			nonfeeding	blood	intra	Prokaryota		yes	no	no			Marshall 2012	Marshall 2012	Duron et al 2014
Diptera_Hippoboscidae	Diptera	Hippoboscidae	ALO-3			cosegragation	yes	Ornithomya	chloropus			nonfeeding	blood	intra	Prokaryota		yes	no	no			Marshall 2012	Marshall 2012	Duron et al 2014
Diptera_Hippoboscidae	Diptera	Hippoboscidae	ALO-3			cosegragation	yes	Ornithomya	fringillina			nonfeeding	blood	intra	Prokaryota		yes	no	no			Marshall 2012	Marshall 2012	Duron et al 2014
Diptera_Hippoboscidae	Diptera	Hippoboscidae	ALO-3			cosegragation	yes	Stenepteryx	hirundinis			nonfeeding	blood	intra	Prokaryota		yes	no	no			Marshall 2012	Marshall 2012	Duron et al 2014
Diptera_Hippoboscidae	Diptera	Hippoboscidae	ALO-3			cosegragation	yes	Ornithomya	avicularia			nonfeeding	blood	intra	Prokaryota		yes	no	no			Marshall 2012	Marshall 2012	Duron et al 2014
Diptera_Hippoboscidae	Diptera	Hippoboscidae	Arsenophonus		yes		yes	Melophagus	ovinus			nonfeeding	blood	intra	Prokaryota		yes	no	no			Marshall 2012	Marshall 2012	Nováková et al 2015	Nováková et al 2015
Diptera_Hippoboscidae	Diptera	Hippoboscidae	Arsenophonus lipopteni	Arsenophonus_symbiont_or_Leptocyclopodia	yes		yes	Lipoptena	cervi			nonfeeding	blood	intra	Prokaryota		yes	yes	yes			Marshall 2012	Marshall 2012	Nováková et al 2016	Nováková et al 2016
Diptera_Nycteribiidae	Diptera	Nycteribiidae	Candidatus Aschnera chinzeii	Aschnera_chinzeii_of_Nycteribia_allotopa	yes	cosegragation	yes	Penicillidia	conspicua			nonfeeding	blood	intra	Prokaryota		yes	yes	yes			Marshall 2012	Marshall 2012	Duron et al 2014
Diptera_Nycteribiidae	Diptera	Nycteribiidae	Candidatus Aschnera chinzeii	Aschnera_chinzeii_of_Nycteribia_allotopa	yes	cosegragation	yes	Penicillidia	fulvida			nonfeeding	blood	intra	Prokaryota		yes	yes	yes			Marshall 2012	Marshall 2012	Duron et al 2014
Diptera_Nycteribiidae	Diptera	Nycteribiidae	Candidatus Aschnera chinzeii	Aschnera_chinzeii_of_Nycteribia_allotopa	yes	cosegragation	yes	Nycteribia	kolenatii			nonfeeding	blood	intra	Prokaryota		yes	yes	yes			Marshall 2012	Marshall 2012	Duron et al 2014
Diptera_Nycteribiidae	Diptera	Nycteribiidae	Candidatus Aschnera chinzeii	Aschnera_chinzeii_of_Nycteribia_allotopa	yes	cosegragation	yes	Penicillidia	leptothrinax			nonfeeding	blood	intra	Prokaryota		yes	yes	yes			Marshall 2012	Marshall 2012	Duron et al 2014
Diptera_Nycteribiidae	Diptera	Nycteribiidae	Candidatus Aschnera chinzeii	Aschnera_chinzeii_of_Nycteribia_allotopa	yes	cosegragation	yes	Nycteribia	schmidlii			nonfeeding	blood	intra	Prokaryota		yes	yes	yes			Marshall 2012	Marshall 2012	Duron et al 2014
Diptera_Nycteribiidae	Diptera	Nycteribiidae	Candidatus Aschnera chinzeii	Aschnera_chinzeii_of_Nycteribia_allotopa	yes	cosegragation	yes	Nycteribia	stylidiopsis			nonfeeding	blood	intra	Prokaryota		yes	yes	yes			Marshall 2012	Marshall 2012	Duron et al 2014
Diptera_Nycteribiidae	Diptera	Nycteribiidae	Candidatus Aschnera chinzeii	Aschnera_chinzeii_of_Nycteribia_allotopa	yes	cosegragation	yes	Penicillidia	jenynsii			nonfeeding	blood	intra	Prokaryota		yes	yes	yes			Marshall 2012	Marshall 2012	Hosokawa 2012B	Hosokawa et al 2012B
Diptera_Nycteribiidae	Diptera	Nycteribiidae	Candidatus Aschnera chinzeii	Aschnera_chinzeii_of_Nycteribia_allotopa	yes	cosegragation	yes	Nycteribia	allotopa			nonfeeding	blood	intra	Prokaryota		yes	yes	yes			Marshall 2012	Marshall 2012	Hosokawa 2012B
Diptera_Nycteribiidae	Diptera	Nycteribiidae	Candidatus Aschnera chinzeii	Aschnera_chinzeii_of_Nycteribia_allotopa	yes	cosegragation	yes	Phthiridium	hindlei			nonfeeding	blood	intra	Prokaryota		yes	yes	yes			Marshall 2012	Marshall 2012	Hosokawa 2012B
Diptera_Nycteribiidae	Diptera	Nycteribiidae	Candidatus Aschnera chinzeii	Aschnera_chinzeii_of_Nycteribia_allotopa	yes	cosegragation	yes	Penicillidia	monoceros			nonfeeding	blood	intra	Prokaryota		yes	yes	yes			Marshall 2012	Marshall 2012	Hosokawa 2012B
Diptera_Nycteribiidae	Diptera	Nycteribiidae	Candidatus Aschnera chinzeii	Aschnera_chinzeii_of_Nycteribia_allotopa	yes	cosegragation	yes	Nycteribia	pleuralis			nonfeeding	blood	intra	Prokaryota		yes	yes	yes			Marshall 2012	Marshall 2012	Hosokawa 2012B
Diptera_Nycteribiidae	Diptera	Nycteribiidae	Candidatus Aschnera chinzeii	Aschnera_chinzeii_of_Nycteribia_allotopa	yes	cosegragation	yes	Nycteribia	pygmaea			nonfeeding	blood	intra	Prokaryota		yes	yes	yes			Marshall 2012	Marshall 2012	Hosokawa 2012B
Diptera_Nycteribiidae	Diptera	Nycteribiidae	Candidatus Aschnera chinzeii	Aschnera_chinzeii_of_Nycteribia_allotopa	yes	cosegragation	yes	Basilia	rybini			nonfeeding	blood	intra	Prokaryota		yes	yes	yes			Marshall 2012	Marshall 2012	Hosokawa 2012B
Diptera_Nycteribiidae	Diptera	Nycteribiidae	Candidatus Aschnera chinzeii	Aschnera_chinzeii_of_Nycteribia_allotopa	yes	cosegragation	yes	Basilia	truncata			nonfeeding	blood	intra	Prokaryota		yes	yes	yes			Marshall 2012	Marshall 2012	Hosokawa 2012B
Diptera_Psychodidae	Diptera	Psychodidae	none known			fitness reduction	no	Phlebotomus	sp			algae/detritus	nectar/blood				yes	no	no			Marshall 2012	Marshall 2012	Aschner (date unknown) from Buchner 1965
Diptera_Streblidae	Diptera	Streblidae	ALO-1	ALO1_symbiont_of_Trichobius	yes		yes	Trichobius	frequens			nonfeeding	blood	intra	Prokaryota		yes	yes	yes			Marshall 2012	Marshall 2012	Morse et al 2013	Morse et al 2013
Diptera_Streblidae	Diptera	Streblidae	Bacteria		yes		yes	Nycterophilia	coxata			nonfeeding	blood	intra	Prokaryota		yes	no	no			Marshall 2012	Marshall 2012	Morse et al 2013	Morse et al 2013
Diptera_Tabanidae	Diptera	Tabanidae	none known		none known		no	gen	sp			detritus/insects/meat	blood/flowers/fruit/nectar				yes	no	no			Marshall 2012	Marshall 2012	Buchner 1965	Buchner 1965
Diptera_Tephritidae	Diptera	Tephritidae	Candidatus Erwinia dacicola														no	no	no					Buchner 1965
Ephemeroptera_Acanthametropodidae	Ephemeroptera	Acanthametropodidae	none known		none known		no					insects	nonfeeding				full	no	no			based on Rainford 2014	based on Rainford 2014	Buchner 1965	Buchner 1965
Ephemeroptera_Ameletidae	Ephemeroptera	Ameletidae	none known		none known		no					detritus	nonfeeding				full	no	no			based on Rainford 2014	based on Rainford 2014	Buchner 1965	Buchner 1965
Ephemeroptera_Ameletopsidae	Ephemeroptera	Ameletopsidae	none known		none known		no					insects	nonfeeding				full	no	no			based on Rainford 2014	based on Rainford 2014	Buchner 1965	Buchner 1965
Ephemeroptera_Ametropodidae	Ephemeroptera	Ametropodidae	none known		none known		no					detritus	nonfeeding				full	no	no			based on Rainford 2014	based on Rainford 2014	Buchner 1965	Buchner 1965
Ephemeroptera_Baetidae	Ephemeroptera	Baetidae	none known		none known		no					detritus/insects	nonfeeding				full	no	no			based on Rainford 2014	based on Rainford 2014	Buchner 1965	Buchner 1965
Ephemeroptera_Baetiscidae	Ephemeroptera	Baetiscidae	none known		none known		no					detritus	nonfeeding				full	no	no			based on Rainford 2014	based on Rainford 2014	Buchner 1965	Buchner 1965
Ephemeroptera_Behningiidae	Ephemeroptera	Behningiidae	none known		none known		no					insects	nonfeeding				full	no	no			based on Rainford 2014	based on Rainford 2014	Buchner 1965	Buchner 1965
Ephemeroptera_Caenidae	Ephemeroptera	Caenidae	none known		none known		no					detritus	nonfeeding				full	no	no			based on Rainford 2014	based on Rainford 2014	Buchner 1965	Buchner 1965
Ephemeroptera_Coloburiscidae	Ephemeroptera	Coloburiscidae	none known		none known		no					detritus	nonfeeding				full	no	no			based on Rainford 2014	based on Rainford 2014	Buchner 1965	Buchner 1965
Ephemeroptera_Dipteromimidae	Ephemeroptera	Dipteromimidae	none known		none known		no					detritus	nonfeeding				full	no	no			based on Rainford 2014	based on Rainford 2014	Buchner 1965	Buchner 1965	Diet estimated by closest relative Isonychiidae
Ephemeroptera_Ephemerellidae	Ephemeroptera	Ephemerellidae	none known		none known		no					detritus	nonfeeding				full	no	no			based on Rainford 2014	based on Rainford 2014	Buchner 1965	Buchner 1965
Ephemeroptera_Ephemeridae	Ephemeroptera	Ephemeridae	none known		none known		no					detritus/insects	nonfeeding				full	no	no			based on Rainford 2014	based on Rainford 2014	Buchner 1965	Buchner 1965
Ephemeroptera_Euthyplociidae	Ephemeroptera	Euthyplociidae	none known		none known		no					detritus	nonfeeding				full	no	no			based on Rainford 2014	based on Rainford 2014	Buchner 1965	Buchner 1965
Ephemeroptera_Heptageniidae	Ephemeroptera	Heptageniidae	none known		none known		no					detritus/insects	nonfeeding				full	no	no			based on Rainford 2014	based on Rainford 2014	Buchner 1965	Buchner 1965
Ephemeroptera_Ichthybotidae	Ephemeroptera	Ichthybotidae	none known		none known		no					detritus	nonfeeding				full	no	no			based on Rainford 2014	based on Rainford 2014	Buchner 1965	Buchner 1965
Ephemeroptera_Isonychiidae	Ephemeroptera	Isonychiidae	none known		none known		no					detritus	nonfeeding				full	no	no			based on Rainford 2014	based on Rainford 2014	Buchner 1965	Buchner 1965
Ephemeroptera_Leptohyphidae	Ephemeroptera	Leptohyphidae	none known		none known		no					detritus	nonfeeding				full	no	no			based on Rainford 2014	based on Rainford 2014	Buchner 1965	Buchner 1965
Ephemeroptera_Leptophlebiidae	Ephemeroptera	Leptophlebiidae	none known		none known		no					detritus	nonfeeding				full	no	no			based on Rainford 2014	based on Rainford 2014	Buchner 1965	Buchner 1965
Ephemeroptera_Metretopodidae	Ephemeroptera	Metretopodidae	none known		none known		no					detritus/insects	nonfeeding				full	no	no			based on Rainford 2014	based on Rainford 2014	Buchner 1965	Buchner 1965
Ephemeroptera_Neoephemeridae	Ephemeroptera	Neoephemeridae	none known		none known		no					detritus	nonfeeding				full	no	no			based on Rainford 2014	based on Rainford 2014	Buchner 1965	Buchner 1965
Ephemeroptera_Nesameletidae	Ephemeroptera	Nesameletidae	none known		none known		no					detritus	nonfeeding				full	no	no			based on Rainford 2014	based on Rainford 2014	Buchner 1965	Buchner 1965
Ephemeroptera_Oligoneuriidae	Ephemeroptera	Oligoneuriidae	none known		none known		no					detritus	nonfeeding				full	no	no			based on Rainford 2014	based on Rainford 2014	Buchner 1965	Buchner 1965
Ephemeroptera_Oniscigastridae	Ephemeroptera	Oniscigastridae	none known		none known		no					detritus	nonfeeding				full	no	no			based on Rainford 2014	based on Rainford 2014	Buchner 1965	Buchner 1965
Ephemeroptera_Palingeniidae	Ephemeroptera	Palingeniidae	none known		none known		no					detritus	nonfeeding				full	no	no			based on Rainford 2014	based on Rainford 2014	Buchner 1965	Buchner 1965
Ephemeroptera_Polymitarcyidae	Ephemeroptera	Polymitarcyidae	none known		none known		no					detritus	nonfeeding				full	no	no			based on Rainford 2014	based on Rainford 2014	Buchner 1965	Buchner 1965
Ephemeroptera_Potamanthidae	Ephemeroptera	Potamanthidae	none known		none known		no					detritus	nonfeeding				full	no	no			based on Rainford 2014	based on Rainford 2014	Buchner 1965	Buchner 1965
Ephemeroptera_Prosopistomatidae	Ephemeroptera	Prosopistomatidae	none known		none known		no					insects	nonfeeding				full	no	no			based on Rainford 2014	based on Rainford 2014	Buchner 1965	Buchner 1965
Ephemeroptera_Rallidentidae	Ephemeroptera	Rallidentidae	none known		none known		no					detritus	nonfeeding				full	no	no			based on Rainford 2014	based on Rainford 2014	Buchner 1965	Buchner 1965
Ephemeroptera_Siphlaenigmatidae	Ephemeroptera	Siphlaenigmatidae	none known		none known		no					detritus	nonfeeding				full	no	no			based on Rainford 2014	based on Rainford 2014	Buchner 1965	Buchner 1965
Ephemeroptera_Siphlonuridae	Ephemeroptera	Siphlonuridae	none known		none known		no					detritus/insects	nonfeeding				full	no	no			based on Rainford 2014	based on Rainford 2014	Buchner 1965	Buchner 1965
Ephemeroptera_Teloganodidae	Ephemeroptera	Teloganodidae	none known		none known		no					detritus	nonfeeding				full	no	no			based on Rainford 2014	based on Rainford 2014	Buchner 1965	Buchner 1965
Ephemeroptera_Tricorythidae	Ephemeroptera	Tricorythidae	none known		none known		no					detritus	nonfeeding				full	no	no			based on Rainford 2014	based on Rainford 2014	Buchner 1965	Buchner 1965
Hemiptera_Acanaloniidae	Hemiptera	Acanaloniidae	F-symbiont		yes		yes	gen	sp1			phloem	phloem	intra	Prokaryota		yes	no	no			Denno and Perfect 1994 Novotny and Wilson 1997	D'Urso and Uliana 2006 Denno and Perfect 1994 Novotny and Wilson 1997	Müller 1962	Müller 1962
Hemiptera_Acanaloniidae	Hemiptera	Acanaloniidae	F-symbiont		yes		yes	gen	sp2			phloem	phloem	intra	Prokaryota		yes	no	no			Denno and Perfect 1994 Novotny and Wilson 1997	D'Urso and Uliana 2006 Denno and Perfect 1994 Novotny and Wilson 1997	Müller 1962	Müller 1962
Hemiptera_Acanaloniidae	Hemiptera	Acanaloniidae	H-symbiont														no	no	no					Müller 1962
Hemiptera_Acanthosomatidae	Hemiptera	Acanthosomatidae	Candidatus Rosenkranzia clausaccus	Candidatus_Rosenkranzia_claucaccus	no (gut crypt localised symbiont)	cosegragation	yes	Elasmostethus	humeralis			fruit/seeds	fruit/leaves (parenchyma)	extra	Prokaryota		yes	yes	yes			Hanelová et al 2013	Hanelová et al 2013	Kikuchi et al 2009	Kikuchi et al 2009
Hemiptera_Acanthosomatidae	Hemiptera	Acanthosomatidae	Candidatus Rosenkranzia clausaccus	Candidatus_Rosenkranzia_claucaccus	no (gut crypt localised symbiont)	cosegragation	yes	Elasmostethus	nubilus			fruit/seeds	fruit/leaves (parenchyma)	extra	Prokaryota		yes	yes	yes			Hanelová et al 2013	Hanelová et al 2013	Kikuchi et al 2009	Kikuchi et al 2009
Hemiptera_Acanthosomatidae	Hemiptera	Acanthosomatidae	Candidatus Rosenkranzia clausaccus	Candidatus_Rosenkranzia_claucaccus	no (gut crypt localised symbiont)	cosegragation	yes	Elasmostethus	brevis			fruit/seeds	fruit/leaves (parenchyma)	extra	Prokaryota		yes	yes	yes			Hanelová et al 2013	Hanelová et al 2013	Kikuchi et al 2009
Hemiptera_Acanthosomatidae	Hemiptera	Acanthosomatidae	Candidatus Rosenkranzia clausaccus	Candidatus_Rosenkranzia_claucaccus	no (gut crypt localised symbiont)	cosegragation	yes	Acanthosoma	denticaudum			fruit/seeds	fruit/leaves (parenchyma)	extra	Prokaryota		yes	yes	yes			Hanelová et al 2013	Hanelová et al 2013	Kikuchi et al 2009
Hemiptera_Acanthosomatidae	Hemiptera	Acanthosomatidae	Candidatus Rosenkranzia clausaccus	Candidatus_Rosenkranzia_claucaccus	no (gut crypt localised symbiont)	cosegragation	yes	Elasmucha	dorsalis			fruit/seeds	fruit/leaves (parenchyma)	extra	Prokaryota		yes	yes	yes			Hanelová et al 2013	Hanelová et al 2013	Kikuchi et al 2009
Hemiptera_Acanthosomatidae	Hemiptera	Acanthosomatidae	Candidatus Rosenkranzia clausaccus	Candidatus_Rosenkranzia_claucaccus	no (gut crypt localised symbiont)	cosegragation	yes	Sastragala	esakii			fruit/seeds	fruit/leaves (parenchyma)	extra	Prokaryota		yes	yes	yes			Hanelová et al 2013	Hanelová et al 2013	Kikuchi et al 2009
Hemiptera_Acanthosomatidae	Hemiptera	Acanthosomatidae	Candidatus Rosenkranzia clausaccus	Candidatus_Rosenkranzia_claucaccus	no (gut crypt localised symbiont)	cosegragation	yes	Acanthosoma	forficula			fruit/seeds	fruit/leaves (parenchyma)	extra	Prokaryota		yes	yes	yes			Hanelová et al 2013	Hanelová et al 2013	Kikuchi et al 2009
Hemiptera_Acanthosomatidae	Hemiptera	Acanthosomatidae	Candidatus Rosenkranzia clausaccus	Candidatus_Rosenkranzia_claucaccus	no (gut crypt localised symbiont)	cosegragation	yes	Acanthosoma	giganteum			fruit/seeds	fruit/leaves (parenchyma)	extra	Prokaryota		yes	yes	yes			Hanelová et al 2013	Hanelová et al 2013	Kikuchi et al 2009
Hemiptera_Acanthosomatidae	Hemiptera	Acanthosomatidae	Candidatus Rosenkranzia clausaccus	Candidatus_Rosenkranzia_claucaccus	no (gut crypt localised symbiont)	cosegragation	yes	Lindbergicoris	gramineus			fruit/seeds	fruit/leaves (parenchyma)	extra	Prokaryota		yes	yes	yes			Hanelová et al 2013	Hanelová et al 2013	Kikuchi et al 2009
Hemiptera_Acanthosomatidae	Hemiptera	Acanthosomatidae	Candidatus Rosenkranzia clausaccus	Candidatus_Rosenkranzia_claucaccus	no (gut crypt localised symbiont)	cosegragation	yes	Acanthosoma	haemorrhoidale			fruit/seeds	fruit/leaves (parenchyma)	extra	Prokaryota		yes	yes	yes			Hanelová et al 2013	Hanelová et al 2013	Kikuchi et al 2009
Hemiptera_Acanthosomatidae	Hemiptera	Acanthosomatidae	Candidatus Rosenkranzia clausaccus	Candidatus_Rosenkranzia_claucaccus	no (gut crypt localised symbiont)	cosegragation	yes	Acanthosoma	labiduroides			fruit/seeds	fruit/leaves (parenchyma)	extra	Prokaryota		yes	yes	yes			Hanelová et al 2013	Hanelová et al 2013	Kikuchi et al 2009
Hemiptera_Acanthosomatidae	Hemiptera	Acanthosomatidae	Candidatus Rosenkranzia clausaccus	Candidatus_Rosenkranzia_claucaccus	no (gut crypt localised symbiont)	cosegragation	yes	Sastragala	scutellata			fruit/seeds	fruit/leaves (parenchyma)	extra	Prokaryota		yes	yes	yes			Hanelová et al 2013	Hanelová et al 2013	Kikuchi et al 2009
Hemiptera_Acanthosomatidae	Hemiptera	Acanthosomatidae	Candidatus Rosenkranzia clausaccus	Candidatus_Rosenkranzia_claucaccus	no (gut crypt localised symbiont)	cosegragation	yes	Elasmucha	signoreti			fruit/seeds	fruit/leaves (parenchyma)	extra	Prokaryota		yes	yes	yes			Hanelová et al 2013	Hanelová et al 2013	Kikuchi et al 2009
Hemiptera_Achilidae	Hemiptera	Achilidae	Candidatus Sulcia muelleri	Candidatus_Sulcia_muelleri_of_Achilidae	yes	cosegragation	yes	gen	sp10			fungi	phloem	intra	Prokaryota		yes	no	no			Denno and Perfect 1994 Novotny and Wilson 1997	Denno and Perfect 1994 Novotny and Wilson 1997	Müller 1962	Müller 1962	Cosegragation for Sulcia is based on Urban and Cryan 2012 Bressan et al 2009
Hemiptera_Achilidae	Hemiptera	Achilidae	Candidatus Sulcia muelleri	Candidatus_Sulcia_muelleri_of_Achilidae	yes	cosegragation	yes	gen	sp4			fungi	phloem	intra	Prokaryota		yes	no	no			Denno and Perfect 1994 Novotny and Wilson 1997	Denno and Perfect 1994 Novotny and Wilson 1997	Müller 1962	Müller 1962
Hemiptera_Achilidae	Hemiptera	Achilidae	Candidatus Sulcia muelleri	Candidatus_Sulcia_muelleri_of_Achilidae	yes	cosegragation	yes	gen	sp5			fungi	phloem	intra	Prokaryota		yes	no	no			Denno and Perfect 1994 Novotny and Wilson 1997	Denno and Perfect 1994 Novotny and Wilson 1997	Müller 1962	Müller 1962
Hemiptera_Achilidae	Hemiptera	Achilidae	Candidatus Sulcia muelleri	Candidatus_Sulcia_muelleri_of_Achilidae	yes	cosegragation	yes	gen	sp6			fungi	phloem	intra	Prokaryota		yes	no	no			Denno and Perfect 1994 Novotny and Wilson 1997	Denno and Perfect 1994 Novotny and Wilson 1997	Müller 1962	Müller 1962
Hemiptera_Achilidae	Hemiptera	Achilidae	Candidatus Sulcia muelleri	Candidatus_Sulcia_muelleri_of_Achilidae	yes	cosegragation	yes	gen	sp7			fungi	phloem	intra	Prokaryota		yes	no	no			Denno and Perfect 1994 Novotny and Wilson 1997	Denno and Perfect 1994 Novotny and Wilson 1997	Müller 1962	Müller 1962
Hemiptera_Achilidae	Hemiptera	Achilidae	Candidatus Sulcia muelleri	Candidatus_Sulcia_muelleri_of_Achilidae	yes	cosegragation	yes	gen	sp8			fungi	phloem	intra	Prokaryota		yes	no	no			Denno and Perfect 1994 Novotny and Wilson 1997	Denno and Perfect 1994 Novotny and Wilson 1997	Müller 1962	Müller 1962
Hemiptera_Achilidae	Hemiptera	Achilidae	Candidatus Sulcia muelleri	Candidatus_Sulcia_muelleri_of_Achilidae	yes	cosegragation	yes	gen	sp9			fungi	phloem	intra	Prokaryota		yes	no	no			Denno and Perfect 1994 Novotny and Wilson 1997	Denno and Perfect 1994 Novotny and Wilson 1997	Müller 1962	Müller 1962
Hemiptera_Achilidae	Hemiptera	Achilidae	Candidatus Vidania fulgoroideae	Candidatus_Vidania_fulgoroideae_of_Achilidae	yes	cosegragation	yes	gen	sp1			fungi	phloem	intra	Prokaryota		yes	no	no			Denno and Perfect 1994 Novotny and Wilson 1997	Denno and Perfect 1994 Novotny and Wilson 1997	Müller 1962	Müller 1962	Cosegragation for Vidania is based on Urban and Cryan 2012
Hemiptera_Achilidae	Hemiptera	Achilidae	Candidatus Vidania fulgoroideae	Candidatus_Vidania_fulgoroideae_of_Achilidae	yes	cosegragation	yes	gen	sp10			fungi	phloem	intra	Prokaryota		yes	no	no			Denno and Perfect 1994 Novotny and Wilson 1997	Denno and Perfect 1994 Novotny and Wilson 1997	Müller 1962	Müller 1962
Hemiptera_Achilidae	Hemiptera	Achilidae	Candidatus Vidania fulgoroideae	Candidatus_Vidania_fulgoroideae_of_Achilidae	yes	cosegragation	yes	gen	sp2			fungi	phloem	intra	Prokaryota		yes	no	no			Denno and Perfect 1994 Novotny and Wilson 1997	Denno and Perfect 1994 Novotny and Wilson 1997	Müller 1962	Müller 1962
Hemiptera_Achilidae	Hemiptera	Achilidae	Candidatus Vidania fulgoroideae	Candidatus_Vidania_fulgoroideae_of_Achilidae	yes	cosegragation	yes	gen	sp3			fungi	phloem	intra	Prokaryota		yes	no	no			Denno and Perfect 1994 Novotny and Wilson 1997	Denno and Perfect 1994 Novotny and Wilson 1997	Müller 1962	Müller 1962
Hemiptera_Achilidae	Hemiptera	Achilidae	Candidatus Vidania fulgoroideae	Candidatus_Vidania_fulgoroideae_of_Achilidae	yes	cosegragation	yes	gen	sp4			fungi	phloem	intra	Prokaryota		yes	no	no			Denno and Perfect 1994 Novotny and Wilson 1997	Denno and Perfect 1994 Novotny and Wilson 1997	Müller 1962	Müller 1962
Hemiptera_Achilidae	Hemiptera	Achilidae	Candidatus Vidania fulgoroideae	Candidatus_Vidania_fulgoroideae_of_Achilidae	yes	cosegragation	yes	gen	sp5			fungi	phloem	intra	Prokaryota		yes	no	no			Denno and Perfect 1994 Novotny and Wilson 1997	Denno and Perfect 1994 Novotny and Wilson 1997	Müller 1962	Müller 1962
Hemiptera_Achilidae	Hemiptera	Achilidae	Candidatus Vidania fulgoroideae	Candidatus_Vidania_fulgoroideae_of_Achilidae	yes	cosegragation	yes	gen	sp6			fungi	phloem	intra	Prokaryota		yes	no	no			Denno and Perfect 1994 Novotny and Wilson 1997	Denno and Perfect 1994 Novotny and Wilson 1997	Müller 1962	Müller 1962
Hemiptera_Achilidae	Hemiptera	Achilidae	Candidatus Vidania fulgoroideae	Candidatus_Vidania_fulgoroideae_of_Achilidae	yes	cosegragation	yes	gen	sp7			fungi	phloem	intra	Prokaryota		yes	no	no			Denno and Perfect 1994 Novotny and Wilson 1997	Denno and Perfect 1994 Novotny and Wilson 1997	Müller 1962	Müller 1962
Hemiptera_Achilidae	Hemiptera	Achilidae	Candidatus Vidania fulgoroideae	Candidatus_Vidania_fulgoroideae_of_Achilidae	yes	cosegragation	yes	gen	sp8			fungi	phloem	intra	Prokaryota		yes	no	no			Denno and Perfect 1994 Novotny and Wilson 1997	Denno and Perfect 1994 Novotny and Wilson 1997	Müller 1962	Müller 1962
Hemiptera_Achilidae	Hemiptera	Achilidae	Candidatus Vidania fulgoroideae	Candidatus_Vidania_fulgoroideae_of_Achilidae	yes	cosegragation	yes	gen	sp9			fungi	phloem	intra	Prokaryota		yes	no	no			Denno and Perfect 1994 Novotny and Wilson 1997	Denno and Perfect 1994 Novotny and Wilson 1997	Müller 1962	Müller 1962
Hemiptera_Achilidae	Hemiptera	Achilidae	F-symbiont		yes		yes	gen	sp1			fungi	phloem	intra	Prokaryota		yes	no	no			Denno and Perfect 1994 Novotny and Wilson 1997	Denno and Perfect 1994 Novotny and Wilson 1997	Müller 1962	Müller 1962
Hemiptera_Achilidae	Hemiptera	Achilidae	F-symbiont		yes		yes	gen	sp2			fungi	phloem	intra	Prokaryota		yes	no	no			Denno and Perfect 1994 Novotny and Wilson 1997	Denno and Perfect 1994 Novotny and Wilson 1997	Müller 1962	Müller 1962
Hemiptera_Achilidae	Hemiptera	Achilidae	F-symbiont		yes		yes	gen	sp3			fungi	phloem	intra	Prokaryota		yes	no	no			Denno and Perfect 1994 Novotny and Wilson 1997	Denno and Perfect 1994 Novotny and Wilson 1997	Müller 1962	Müller 1962
Hemiptera_Adelgidae	Hemiptera	Adelgidae	Candidatus Annandia adelgestsuga	Candidatus_Annandia_adelgestsuga	yes		yes	Adelges	tsugae	leaves (parenchyma)	leaves (parenchyma)	phloem/leaves (parenchyma)	phloem/leaves (parenchyma)	intra	Prokaryota		yes	yes	no	von Dohlen et al 2013	von Dohlen et al 2013			von Dohlen et al 2013	von Dohlen et al 2013
Hemiptera_Adelgidae	Hemiptera	Adelgidae	Candidatus Annandia pinicola	Candidatus_Annandia_adelgestsuga	yes		yes	Pineus	strobi			phloem/leaves (parenchyma)	phloem/leaves (parenchyma)	intra	Prokaryota		yes	no	no			Toenshoff et al 2012A & 2012B	Toenshoff et al 2012A & 2012B	Toenshoff et al 2014	Toenshoff et al 2014
Hemiptera_Adelgidae	Hemiptera	Adelgidae	Candidatus Ecksteinia adelgidicola	Candidatus_Ecksteinia_adelgidicola	yes		yes	Adelges	nordmannianae (piceae)	leaves (parenchyma)	leaves (parenchyma)	phloem/leaves (parenchyma)	phloem/leaves (parenchyma)	intra	Prokaryota		yes	yes	no	Toenshoff et al 2012B	Toenshoff et al 2012B			Toenshoff et al 2012B	Toenshoff et al 2012B
Hemiptera_Adelgidae	Hemiptera	Adelgidae	Candidatus Gillettellia cooleyia	Candidatus_Gillettellia_cooleyia	yes		yes	Adelges	cooleyi (coweni)			phloem/leaves (parenchyma)	phloem/leaves (parenchyma)	intra	Prokaryota		yes	yes	no			Toenshoff et al 2012A & 2012B	Toenshoff et al 2012A & 2012B	Toenshoff et al 2012A	Toenshoff et al 2012A
Hemiptera_Adelgidae	Hemiptera	Adelgidae	Candidatus Hartigia pinicola	Candidatus_Hartigia_pinicola	yes		yes	Pineus	strobi			phloem/leaves (parenchyma)	phloem/leaves (parenchyma)	intra	Prokaryota		yes	yes	no			Toenshoff et al 2012A & 2012B	Toenshoff et al 2012A & 2012B	Toenshoff et al 2014	Toenshoff et al 2014
Hemiptera_Adelgidae	Hemiptera	Adelgidae	Candidatus Profftia tarda	Candidatus_Profftia_tarda	yes	cosegragation	yes	Adelges	abietis (viridis)			phloem/leaves (parenchyma)	phloem/leaves (parenchyma)	intra	Prokaryota		yes	yes	no			Toenshoff et al 2012A & 2012B	Toenshoff et al 2012A & 2012B	Toenshoff et al 2012A	Toenshoff et al 2012A
Hemiptera_Adelgidae	Hemiptera	Adelgidae	Candidatus Profftia tarda	Candidatus_Profftia_tarda	yes	cosegragation	yes	Adelges	laricis/tardus			phloem/leaves (parenchyma)	phloem/leaves (parenchyma)	intra	Prokaryota		yes	yes	no			Toenshoff et al 2012A & 2012B	Toenshoff et al 2012A & 2012B	Toenshoff et al 2012	Toenshoff et al 2012
Hemiptera_Adelgidae	Hemiptera	Adelgidae	Candidatus Serratia symbiotica	Candidatus_Serratia_symbiotica_of_Adelges_tsugae	yes		yes	Adelges	tsugae	leaves (parenchyma)	leaves (parenchyma)	phloem/leaves (parenchyma)	phloem/leaves (parenchyma)	intra	Prokaryota		yes	yes	no	von Dohlen et al 2013	von Dohlen et al 2013			von Dohlen et al 2013	von Dohlen et al 2013
Hemiptera_Adelgidae	Hemiptera	Adelgidae	Candidatus Steffania adelgidicola	Candidatus_Steffania_adelgidicola	yes		yes	Adelges	nordmannianae (piceae)	leaves (parenchyma)	leaves (parenchyma)	phloem/leaves (parenchyma)	phloem/leaves (parenchyma)	intra	Prokaryota		yes	yes	no	Toenshoff et al 2012B	Toenshoff et al 2012B			Toenshoff et al 2012B	Toenshoff et al 2012B
Hemiptera_Adelgidae	Hemiptera	Adelgidae	Candidatus Valloti acooleyia	Candidatus_Vallotia_cooleyia	yes	cosegragation	yes	Adelges	cooleyi (coweni)			phloem/leaves (parenchyma)	phloem/leaves (parenchyma)	intra	Prokaryota		yes	yes	no			Toenshoff et al 2012A & 2012B	Toenshoff et al 2012A & 2012B	Toenshoff et al 2012A	Toenshoff et al 2012A
Hemiptera_Adelgidae	Hemiptera	Adelgidae	Candidatus Vallotia tarda	Candidatus_Vallotia_tarda	yes	cosegragation	yes	Adelges	laricis/tardus			phloem/leaves (parenchyma)	phloem/leaves (parenchyma)	intra	Prokaryota		yes	no	no			Toenshoff et al 2012A & 2012B	Toenshoff et al 2012A & 2012B	Toenshoff et al 2012	Toenshoff et al 2012
Hemiptera_Adelgidae	Hemiptera	Adelgidae	Candidatus Vallotia virida	Candidatus_Vallotia_virida	yes	cosegragation	yes	Adelges	abietis (viridis)			phloem/leaves (parenchyma)	phloem/leaves (parenchyma)	intra	Prokaryota		yes	no	no			Toenshoff et al 2012A & 2012B	Toenshoff et al 2012A & 2012B	Toenshoff et al 2012A	Toenshoff et al 2012A
Hemiptera_Aleyrodidae	Hemiptera	Aleyrodidae	Candidatus Hamiltonella defensa		yes	not ubiquitous	no	Bemisia	tabaci			phloem	phloem	intra	Prokaryota		no	no	no			Capinera 2008	Capinera 2008	Gueguen et al 2010
Hemiptera_Aleyrodidae	Hemiptera	Aleyrodidae	Candidatus Hamiltonella defensa		yes	not ubiquitous	no	Trialeurodes	vaporariorum			phloem	phloem	intra	Prokaryota		no	no	no			Capinera 2008	Capinera 2008	Skaljac et al 2010	Skaljac et al 2010
Hemiptera_Aleyrodidae	Hemiptera	Aleyrodidae	Candidatus Portiera aleyrodidarum	Candidatus_Portiera_aleyrodidarum	yes	cosegragation	yes	Bemisia	tabaci			phloem	phloem	intra	Prokaryota		yes	yes	yes			Capinera 2008	Capinera 2008	Thao and Baumann 2004	Skaljac et al 2010
Hemiptera_Aleyrodidae	Hemiptera	Aleyrodidae	Candidatus Portiera aleyrodidarum	Candidatus_Portiera_aleyrodidarum	yes	cosegragation	yes	Trialeurodes	vaporariorum			phloem	phloem	intra	Prokaryota		yes	yes	yes			Capinera 2008	Capinera 2008	Thao and Baumann 2004	Skaljac et al 2010
Hemiptera_Aleyrodidae	Hemiptera	Aleyrodidae	Candidatus Portiera aleyrodidarum	Candidatus_Portiera_aleyrodidarum	yes	cosegragation	yes	Tetraleurodes	acaciae			phloem	phloem	intra	Prokaryota		yes	yes	yes			Capinera 2008	Capinera 2008	Thao and Baumann 2004
Hemiptera_Aleyrodidae	Hemiptera	Aleyrodidae	Candidatus Portiera aleyrodidarum	Candidatus_Portiera_aleyrodidarum	yes	cosegragation	yes	Aleurochiton	aceris			phloem	phloem	intra	Prokaryota		yes	yes	yes			Capinera 2008	Capinera 2008	Thao and Baumann 2004
Hemiptera_Aleyrodidae	Hemiptera	Aleyrodidae	Candidatus Portiera aleyrodidarum	Candidatus_Portiera_aleyrodidarum	yes	cosegragation	yes	Neomaskellia	andropogonis			phloem	phloem	intra	Prokaryota		yes	yes	yes			Capinera 2008	Capinera 2008	Thao and Baumann 2004
Hemiptera_Aleyrodidae	Hemiptera	Aleyrodidae	Candidatus Portiera aleyrodidarum	Candidatus_Portiera_aleyrodidarum	yes	cosegragation	yes	Aleuroparadoxus	arctostaphylli			phloem	phloem	intra	Prokaryota		yes	yes	yes			Capinera 2008	Capinera 2008	Thao and Baumann 2004
Hemiptera_Aleyrodidae	Hemiptera	Aleyrodidae	Candidatus Portiera aleyrodidarum	Candidatus_Portiera_aleyrodidarum	yes	cosegragation	yes	Bemisia	argentifolii			phloem	phloem	intra	Prokaryota		yes	yes	yes			Capinera 2008	Capinera 2008	Thao and Baumann 2004
Hemiptera_Aleyrodidae	Hemiptera	Aleyrodidae	Candidatus Portiera aleyrodidarum	Candidatus_Portiera_aleyrodidarum	yes	cosegragation	yes	Vasdavidius	concursus			phloem	phloem	intra	Prokaryota		yes	yes	yes			Capinera 2008	Capinera 2008	Thao and Baumann 2004
Hemiptera_Aleyrodidae	Hemiptera	Aleyrodidae	Candidatus Portiera aleyrodidarum	Candidatus_Portiera_aleyrodidarum	yes	cosegragation	yes	Aleurodicus	dispersus			phloem	phloem	intra	Prokaryota		yes	yes	yes			Capinera 2008	Capinera 2008	Thao and Baumann 2004
Hemiptera_Aleyrodidae	Hemiptera	Aleyrodidae	Candidatus Portiera aleyrodidarum	Candidatus_Portiera_aleyrodidarum	yes	cosegragation	yes	Aleurodicus	dugesii			phloem	phloem	intra	Prokaryota		yes	yes	yes			Capinera 2008	Capinera 2008	Thao and Baumann 2004
Hemiptera_Aleyrodidae	Hemiptera	Aleyrodidae	Candidatus Portiera aleyrodidarum	Candidatus_Portiera_aleyrodidarum	yes	cosegragation	yes	Aleyrodes	elevatus			phloem	phloem	intra	Prokaryota		yes	yes	yes			Capinera 2008	Capinera 2008	Thao and Baumann 2004
Hemiptera_Aleyrodidae	Hemiptera	Aleyrodidae	Candidatus Portiera aleyrodidarum	Candidatus_Portiera_aleyrodidarum	yes	cosegragation	yes	Aleuroplatus	gelatinosus			phloem	phloem	intra	Prokaryota		yes	yes	yes			Capinera 2008	Capinera 2008	Thao and Baumann 2004
Hemiptera_Aleyrodidae	Hemiptera	Aleyrodidae	Candidatus Portiera aleyrodidarum	Candidatus_Portiera_aleyrodidarum	yes	cosegragation	yes	Dialeurodes	groupA			phloem	phloem	intra	Prokaryota		yes	yes	yes			Capinera 2008	Capinera 2008	Thao and Baumann 2004
Hemiptera_Aleyrodidae	Hemiptera	Aleyrodidae	Candidatus Portiera aleyrodidarum	Candidatus_Portiera_aleyrodidarum	yes	cosegragation	yes	Dialeurodes	groupB			phloem	phloem	intra	Prokaryota		yes	yes	yes			Capinera 2008	Capinera 2008	Thao and Baumann 2004
Hemiptera_Aleyrodidae	Hemiptera	Aleyrodidae	Candidatus Portiera aleyrodidarum	Candidatus_Portiera_aleyrodidarum	yes	cosegragation	yes	Dialeurodes	hongkongensis			phloem	phloem	intra	Prokaryota		yes	yes	yes			Capinera 2008	Capinera 2008	Thao and Baumann 2004
Hemiptera_Aleyrodidae	Hemiptera	Aleyrodidae	Candidatus Portiera aleyrodidarum	Candidatus_Portiera_aleyrodidarum	yes	cosegragation	yes	Trialeurodes	hutchingsi			phloem	phloem	intra	Prokaryota		yes	yes	yes			Capinera 2008	Capinera 2008	Thao and Baumann 2004
Hemiptera_Aleyrodidae	Hemiptera	Aleyrodidae	Candidatus Portiera aleyrodidarum	Candidatus_Portiera_aleyrodidarum	yes	cosegragation	yes	Tetraleurodes	mori			phloem	phloem	intra	Prokaryota		yes	yes	yes			Capinera 2008	Capinera 2008	Thao and Baumann 2004
Hemiptera_Aleyrodidae	Hemiptera	Aleyrodidae	Candidatus Portiera aleyrodidarum	Candidatus_Portiera_aleyrodidarum	yes	cosegragation	yes	Siphoninus	phillyreae			phloem	phloem	intra	Prokaryota		yes	yes	yes			Capinera 2008	Capinera 2008	Thao and Baumann 2004
Hemiptera_Aleyrodidae	Hemiptera	Aleyrodidae	Candidatus Portiera aleyrodidarum	Candidatus_Portiera_aleyrodidarum	yes	cosegragation	yes	Aleyrodes	proletella			phloem	phloem	intra	Prokaryota		yes	yes	yes			Capinera 2008	Capinera 2008	Thao and Baumann 2004
Hemiptera_Aleyrodidae	Hemiptera	Aleyrodidae	Candidatus Portiera aleyrodidarum	Candidatus_Portiera_aleyrodidarum	yes	cosegragation	yes	Aleuroplatus	sp			phloem	phloem	intra	Prokaryota		yes	yes	yes			Capinera 2008	Capinera 2008	Thao and Baumann 2004
Hemiptera_Aleyrodidae	Hemiptera	Aleyrodidae	Candidatus Portiera aleyrodidarum	Candidatus_Portiera_aleyrodidarum	yes	cosegragation	yes	Bemisia	sp			phloem	phloem	intra	Prokaryota		yes	yes	yes			Capinera 2008	Capinera 2008	Thao and Baumann 2004
Hemiptera_Aleyrodidae	Hemiptera	Aleyrodidae	Candidatus Portiera aleyrodidarum	Candidatus_Portiera_aleyrodidarum	yes	cosegragation	yes	Acanthaleyrodes	styraci			phloem	phloem	intra	Prokaryota		yes	yes	yes			Capinera 2008	Capinera 2008	Thao and Baumann 2004
Hemiptera_Alydidae	Hemiptera	Alydidae	Burkholdaria														no	no	no					Kikuchi et al 2011 Matsuura et al 2012B
Hemiptera_Anthocoridae	Hemiptera	Anthocoridae	none known		none known		no	gen	sp			insects	insects				yes	no	no			Resh and Cardé 2009	Resh and Cardé 2009	Schneider 1939	Schneider 1939
Hemiptera_Aphidoidea	Hemiptera	Aphidoidea	Buchnera aphidicola	Buchnera_aphidicola	yes	cosegragation	yes	Brachycaudus	aconiti			phloem	phloem	intra	Prokaryota		yes	yes	yes			Raven 1983 Dinant et al 2010	Raven 1983 Dinant et al 2010	Jousselin et al 2009
Hemiptera_Aphidoidea	Hemiptera	Aphidoidea	Buchnera aphidicola	Buchnera_aphidicola	yes	cosegragation	yes	Brachycaudus	amygdalinus			phloem	phloem	intra	Prokaryota		yes	yes	yes			Raven 1983 Dinant et al 2010	Raven 1983 Dinant et al 2010	Jousselin et al 2009
Hemiptera_Aphidoidea	Hemiptera	Aphidoidea	Buchnera aphidicola	Buchnera_aphidicola	yes	cosegragation	yes	Brachycaudus	ballotae			phloem	phloem	intra	Prokaryota		yes	yes	yes			Raven 1983 Dinant et al 2010	Raven 1983 Dinant et al 2010	Jousselin et al 2009
Hemiptera_Aphidoidea	Hemiptera	Aphidoidea	Buchnera aphidicola	Buchnera_aphidicola	yes	cosegragation	yes	Brachycaudus	bicolor			phloem	phloem	intra	Prokaryota		yes	yes	yes			Raven 1983 Dinant et al 2010	Raven 1983 Dinant et al 2010	Jousselin et al 2009
Hemiptera_Aphidoidea	Hemiptera	Aphidoidea	Buchnera aphidicola	Buchnera_aphidicola	yes	cosegragation	yes	Brachycaudus	cardui			phloem	phloem	intra	Prokaryota		yes	yes	yes			Raven 1983 Dinant et al 2010	Raven 1983 Dinant et al 2010	Jousselin et al 2009
Hemiptera_Aphidoidea	Hemiptera	Aphidoidea	Buchnera aphidicola	Buchnera_aphidicola	yes	cosegragation	yes	Brachycaudus	cerasicola			phloem	phloem	intra	Prokaryota		yes	yes	yes			Raven 1983 Dinant et al 2010	Raven 1983 Dinant et al 2010	Jousselin et al 2009
Hemiptera_Aphidoidea	Hemiptera	Aphidoidea	Buchnera aphidicola	Buchnera_aphidicola	yes	cosegragation	yes	Brachycaudus	cerinthis			phloem	phloem	intra	Prokaryota		yes	yes	yes			Raven 1983 Dinant et al 2010	Raven 1983 Dinant et al 2010	Jousselin et al 2009
Hemiptera_Aphidoidea	Hemiptera	Aphidoidea	Buchnera aphidicola	Buchnera_aphidicola	yes	cosegragation	yes	Brachycaudus	divaricatae			phloem	phloem	intra	Prokaryota		yes	yes	yes			Raven 1983 Dinant et al 2010	Raven 1983 Dinant et al 2010	Jousselin et al 2009
Hemiptera_Aphidoidea	Hemiptera	Aphidoidea	Buchnera aphidicola	Buchnera_aphidicola	yes	cosegragation	yes	Brachycaudus	helichrysi			phloem	phloem	intra	Prokaryota		yes	yes	yes			Raven 1983 Dinant et al 2010	Raven 1983 Dinant et al 2010	Jousselin et al 2009
Hemiptera_Aphidoidea	Hemiptera	Aphidoidea	Buchnera aphidicola	Buchnera_aphidicola	yes	cosegragation	yes	Brachycaudus	jacobi			phloem	phloem	intra	Prokaryota		yes	yes	yes			Raven 1983 Dinant et al 2010	Raven 1983 Dinant et al 2010	Jousselin et al 2009
Hemiptera_Aphidoidea	Hemiptera	Aphidoidea	Buchnera aphidicola	Buchnera_aphidicola	yes	cosegragation	yes	Brachycaudus	klugkisti			phloem	phloem	intra	Prokaryota		yes	yes	yes			Raven 1983 Dinant et al 2010	Raven 1983 Dinant et al 2010	Jousselin et al 2009
Hemiptera_Aphidoidea	Hemiptera	Aphidoidea	Buchnera aphidicola	Buchnera_aphidicola	yes	cosegragation	yes	Brachycaudus	lamii			phloem	phloem	intra	Prokaryota		yes	yes	yes			Raven 1983 Dinant et al 2010	Raven 1983 Dinant et al 2010	Jousselin et al 2009
Hemiptera_Aphidoidea	Hemiptera	Aphidoidea	Buchnera aphidicola	Buchnera_aphidicola	yes	cosegragation	yes	Brachycaudus	lateralis			phloem	phloem	intra	Prokaryota		yes	yes	yes			Raven 1983 Dinant et al 2010	Raven 1983 Dinant et al 2010	Jousselin et al 2009
Hemiptera_Aphidoidea	Hemiptera	Aphidoidea	Buchnera aphidicola	Buchnera_aphidicola	yes	cosegragation	yes	Brachycaudus	linariae			phloem	phloem	intra	Prokaryota		yes	yes	yes			Raven 1983 Dinant et al 2010	Raven 1983 Dinant et al 2010	Jousselin et al 2009
Hemiptera_Aphidoidea	Hemiptera	Aphidoidea	Buchnera aphidicola	Buchnera_aphidicola	yes	cosegragation	yes	Brachycaudus	lucifugus			phloem	phloem	intra	Prokaryota		yes	yes	yes			Raven 1983 Dinant et al 2010	Raven 1983 Dinant et al 2010	Jousselin et al 2009
Hemiptera_Aphidoidea	Hemiptera	Aphidoidea	Buchnera aphidicola	Buchnera_aphidicola	yes	cosegragation	yes	Brachycaudus	lychnicola			phloem	phloem	intra	Prokaryota		yes	yes	yes			Raven 1983 Dinant et al 2010	Raven 1983 Dinant et al 2010	Jousselin et al 2009
Hemiptera_Aphidoidea	Hemiptera	Aphidoidea	Buchnera aphidicola	Buchnera_aphidicola	yes	cosegragation	yes	Brachycaudus	lychnidis			phloem	phloem	intra	Prokaryota		yes	yes	yes			Raven 1983 Dinant et al 2010	Raven 1983 Dinant et al 2010	Jousselin et al 2009
Hemiptera_Aphidoidea	Hemiptera	Aphidoidea	Buchnera aphidicola	Buchnera_aphidicola	yes	cosegragation	yes	Brachycaudus	malvae			phloem	phloem	intra	Prokaryota		yes	yes	yes			Raven 1983 Dinant et al 2010	Raven 1983 Dinant et al 2010	Jousselin et al 2009
Hemiptera_Aphidoidea	Hemiptera	Aphidoidea	Buchnera aphidicola	Buchnera_aphidicola	yes	cosegragation	yes	Brachycaudus	mordvilkoi			phloem	phloem	intra	Prokaryota		yes	yes	yes			Raven 1983 Dinant et al 2010	Raven 1983 Dinant et al 2010	Jousselin et al 2009
Hemiptera_Aphidoidea	Hemiptera	Aphidoidea	Buchnera aphidicola	Buchnera_aphidicola	yes	cosegragation	yes	Brachycaudus	napelli			phloem	phloem	intra	Prokaryota		yes	yes	yes			Raven 1983 Dinant et al 2010	Raven 1983 Dinant et al 2010	Jousselin et al 2009
Hemiptera_Aphidoidea	Hemiptera	Aphidoidea	Buchnera aphidicola	Buchnera_aphidicola	yes	cosegragation	yes	Brachycaudus	persicae			phloem	phloem	intra	Prokaryota		yes	yes	yes			Raven 1983 Dinant et al 2010	Raven 1983 Dinant et al 2010	Jousselin et al 2009
Hemiptera_Aphidoidea	Hemiptera	Aphidoidea	Buchnera aphidicola	Buchnera_aphidicola	yes	cosegragation	yes	Brachycaudus	populi			phloem	phloem	intra	Prokaryota		yes	yes	yes			Raven 1983 Dinant et al 2010	Raven 1983 Dinant et al 2010	Jousselin et al 2009
Hemiptera_Aphidoidea	Hemiptera	Aphidoidea	Buchnera aphidicola	Buchnera_aphidicola	yes	cosegragation	yes	Brachycaudus	prunicola			phloem	phloem	intra	Prokaryota		yes	yes	yes			Raven 1983 Dinant et al 2010	Raven 1983 Dinant et al 2010	Jousselin et al 2009
Hemiptera_Aphidoidea	Hemiptera	Aphidoidea	Buchnera aphidicola	Buchnera_aphidicola	yes	cosegragation	yes	Brachycaudus	rumexicolens			phloem	phloem	intra	Prokaryota		yes	yes	yes			Raven 1983 Dinant et al 2010	Raven 1983 Dinant et al 2010	Jousselin et al 2009
Hemiptera_Aphidoidea	Hemiptera	Aphidoidea	Buchnera aphidicola	Buchnera_aphidicola	yes	cosegragation	yes	Brachycaudus	salicinae			phloem	phloem	intra	Prokaryota		yes	yes	yes			Raven 1983 Dinant et al 2010	Raven 1983 Dinant et al 2010	Jousselin et al 2009
Hemiptera_Aphidoidea	Hemiptera	Aphidoidea	Buchnera aphidicola	Buchnera_aphidicola	yes	cosegragation	yes	Brachycaudus	schwartzi			phloem	phloem	intra	Prokaryota		yes	yes	yes			Raven 1983 Dinant et al 2010	Raven 1983 Dinant et al 2010	Jousselin et al 2009
Hemiptera_Aphidoidea	Hemiptera	Aphidoidea	Buchnera aphidicola	Buchnera_aphidicola	yes	cosegragation	yes	Brachycaudus	spiraeae			phloem	phloem	intra	Prokaryota		yes	yes	yes			Raven 1983 Dinant et al 2010	Raven 1983 Dinant et al 2010	Jousselin et al 2009
Hemiptera_Aphidoidea	Hemiptera	Aphidoidea	Buchnera aphidicola	Buchnera_aphidicola	yes	cosegragation	yes	Brachycaudus	tragopogonis			phloem	phloem	intra	Prokaryota		yes	yes	yes			Raven 1983 Dinant et al 2010	Raven 1983 Dinant et al 2010	Jousselin et al 2009
Hemiptera_Aphidoidea	Hemiptera	Aphidoidea	Buchnera aphidicola	Buchnera_aphidicola	yes	cosegragation	yes	Uroleucon	jaceicola			phloem	phloem	intra	Prokaryota		yes	yes	yes			Raven 1983 Dinant et al 2010	Raven 1983 Dinant et al 2010	Moran and Telang 1998	Moran and Telang 1998
Hemiptera_Aphidoidea	Hemiptera	Aphidoidea	Buchnera aphidicola	Buchnera_aphidicola	yes	cosegragation	yes	Acyrthosiphon	pisum			phloem	phloem	intra	Prokaryota		yes	yes	yes			Raven 1983 Dinant et al 2010	Raven 1983 Dinant et al 2010	Munson et al 1991	Braendle et al 2003
Hemiptera_Aphidoidea	Hemiptera	Aphidoidea	Buchnera aphidicola	Buchnera_aphidicola	yes	cosegragation	yes	Uroleucon	sonchi			phloem	phloem	intra	Prokaryota		yes	yes	yes			Raven 1983 Dinant et al 2010	Raven 1983 Dinant et al 2010	Munson et al 1991	Moran and Telan1998
Hemiptera_Aphidoidea	Hemiptera	Aphidoidea	Candidatus Fukatsuia symbiotica			not ubiquitous	no	Acyrthosiphon	pisum			phloem	phloem	intra & extra	Prokaryota	yes	no	no	no			Raven 1983 Dinant et al 2010	Raven 1983 Dinant et al 2010	Henry et al 2013 Heyworth et al 2015
Hemiptera_Aphidoidea	Hemiptera	Aphidoidea	Candidatus Hamiltonella defensa			not ubiquitous	no	Acyrthosiphon	pisum			phloem	phloem	intra & extra	Prokaryota	yes	no	no	no			Raven 1983 Dinant et al 2010	Raven 1983 Dinant et al 2010	Henry et al 2013 Oliver et al 2003
Hemiptera_Aphidoidea	Hemiptera	Aphidoidea	Candidatus Regiella insecticola			not ubiquitous	no	Acyrthosiphon	pisum			phloem	phloem	intra & extra	Prokaryota	yes	no	no	no			Raven 1983 Dinant et al 2010	Raven 1983 Dinant et al 2010	Henry et al 2013 Scarorough et al 2005
Hemiptera_Aphidoidea	Hemiptera	Aphidoidea	Candidatus Rickettsiella viridis			not ubiquitous	no	Acyrthosiphon	pisum			phloem	phloem	intra	Prokaryota	yes	no	no	no			Raven 1983 Dinant et al 2010	Raven 1983 Dinant et al 2010	Tsuchida et al 2014 Łukasik et al 2013
Hemiptera_Aphidoidea	Hemiptera	Aphidoidea	Candidatus Serratia symbiotica			not ubiquitous	no	Acyrthosiphon	pisum			phloem	phloem	intra & extra	Prokaryota	yes	no	no	no			Raven 1983 Dinant et al 2010	Raven 1983 Dinant et al 2010	Henry et al 2013 Oliver et al 2006
Hemiptera_Aphidoidea	Hemiptera	Aphidoidea	Candidatus Serratia symbiotica (of Lachninae)	Candidatus_Serratia_symbiotica_of_Cinara_cedri	yes		yes	Cinara	cedri			phloem	phloem	intra	Prokaryota		yes	yes	no			Raven 1983 Dinant et al 2010	Raven 1983 Dinant et al 2010	Lamelas et al 2011	Lamelas et al 2011
Hemiptera_Aphidoidea	Hemiptera	Aphidoidea	Rickettsia sp.			not ubiquitous	no	Acyrthosiphon	pisum			phloem	phloem	intra	Prokaryota	yes	no	no	no			Raven 1983 Dinant et al 2010	Raven 1983 Dinant et al 2010	Tsuchida et al 2002 Łukasik et al 2013
Hemiptera_Aphidoidea	Hemiptera	Aphidoidea	Sodalis-like symbiont					Cinara	sp			phloem	phloem	intra	Prokaryota		no	no	no			Raven 1983 Dinant et al 2010	Raven 1983 Dinant et al 2010	Burke et al 2009
Hemiptera_Aphidoidea	Hemiptera	Aphidoidea	Spiroplasma sp.			not ubiquitous	no	Acyrthosiphon	pisum			phloem	phloem	intra	Prokaryota	yes	no	no	no			Raven 1983 Dinant et al 2010	Raven 1983 Dinant et al 2010	Tsuchida et al 2002 Łukasik et al 2013
Hemiptera_Aphidoidea	Hemiptera	Aphidoidea	Yamatocallis tokyoensis		yes		yes	Yamatocallis	hirayamae			phloem	phloem	intra	Prokaryota		yes	no	no			Raven 1983 Dinant et al 2010	Raven 1983 Dinant et al 2010	Fukatsu 2001	Fukatsu 2001
Hemiptera_Aphidoidea	Hemiptera	Aphidoidea	Yamatocallis tokyoensis		yes		yes	Yamatocallis	tokyoensis			phloem	phloem	intra	Prokaryota		yes	no	no			Raven 1983 Dinant et al 2010	Raven 1983 Dinant et al 2010	Fukatsu 2001	Fukatsu 2001
Hemiptera_Aphrophoridae	Hemiptera	Aphrophoridae	Candidatus Sodalis pierantonius	Sodalis_like_endosymbiont_of_Aphrophora	yes		yes	Philaenus	spumarius			xylem	xylem	intra	Prokaryota		yes	yes	no			Horsfield 1978 Dem et al 2013	Horsfield 1978 Dem et al 2013	Koga et al 2013A	Koga et al 2013A
Hemiptera_Aphrophoridae	Hemiptera	Aphrophoridae	Candidatus Sodalis pierantonius	Sodalis_like_endosymbiont_of_Aphrophora	yes		yes	Philaenarcys	bilineata			xylem	xylem	intra	Prokaryota		yes	yes	no			Horsfield 1978 Dem et al 2013	Horsfield 1978 Dem et al 2013	Koga et al 2013A
Hemiptera_Aphrophoridae	Hemiptera	Aphrophoridae	Candidatus Sodalis pierantonius	Sodalis_like_endosymbiont_of_Aphrophora	yes		yes	Mesoptyelus	fascialis			xylem	xylem	intra	Prokaryota		yes	yes	no			Horsfield 1978 Dem et al 2013	Horsfield 1978 Dem et al 2013	Koga et al 2013A
Hemiptera_Aphrophoridae	Hemiptera	Aphrophoridae	Candidatus Sodalis pierantonius	Sodalis_like_endosymbiont_of_Aphrophora	yes		yes	Neophilaenus	lineatus			xylem	xylem	intra	Prokaryota		yes	yes	no			Horsfield 1978 Dem et al 2013	Horsfield 1978 Dem et al 2013	Koga et al 2013A
Hemiptera_Aphrophoridae	Hemiptera	Aphrophoridae	Candidatus Sodalis pierantonius	Sodalis_like_endosymbiont_of_Aphrophora	yes		yes	Philaenus	maghresignus			xylem	xylem	intra	Prokaryota		yes	yes	no			Horsfield 1978 Dem et al 2013	Horsfield 1978 Dem et al 2013	Koga et al 2013A
Hemiptera_Aphrophoridae	Hemiptera	Aphrophoridae	Candidatus Sodalis pierantonius	Sodalis_like_endosymbiont_of_Aphrophora	yes		yes	Aphrophora	quadrinotata			xylem	xylem	intra	Prokaryota		yes	yes	no			Horsfield 1978 Dem et al 2013	Horsfield 1978 Dem et al 2013	Koga et al 2013A
Hemiptera_Aphrophoridae	Hemiptera	Aphrophoridae	Candidatus Sodalis pierantonius	Sodalis_like_endosymbiont_of_Aphrophora	yes		yes	Philaenus	tesselatus			xylem	xylem	intra	Prokaryota		yes	yes	no			Horsfield 1978 Dem et al 2013	Horsfield 1978 Dem et al 2013	Koga et al 2013A
Hemiptera_Aphrophoridae	Hemiptera	Aphrophoridae	Candidatus Sulcia muelleri	Candidatus_Sulcia_muelleri_of_Aphrophoridae	yes	cosegragation	yes	Philaenus	spumarius			xylem	xylem	intra	Prokaryota		yes	no	no			Horsfield 1978 Dem et al 2013	Horsfield 1978 Dem et al 2013	Koga et al 2013A	Koga et al 2013A
Hemiptera_Aphrophoridae	Hemiptera	Aphrophoridae	Candidatus Sulcia muelleri	Candidatus_Sulcia_muelleri_of_Aphrophoridae	yes	cosegragation	yes	Philaenarcys	bilineata			xylem	xylem	intra	Prokaryota		yes	no	no			Horsfield 1978 Dem et al 2013	Horsfield 1978 Dem et al 2013	Koga et al 2013A
Hemiptera_Aphrophoridae	Hemiptera	Aphrophoridae	Candidatus Sulcia muelleri	Candidatus_Sulcia_muelleri_of_Aphrophoridae	yes	cosegragation	yes	Lepyronia	coleoptrata			xylem	xylem	intra	Prokaryota		yes	no	no			Horsfield 1978 Dem et al 2013	Horsfield 1978 Dem et al 2013	Koga et al 2013A
Hemiptera_Aphrophoridae	Hemiptera	Aphrophoridae	Candidatus Sulcia muelleri	Candidatus_Sulcia_muelleri_of_Aphrophoridae	yes	cosegragation	yes	Mesoptyelus	fascialis			xylem	xylem	intra	Prokaryota		yes	no	no			Horsfield 1978 Dem et al 2013	Horsfield 1978 Dem et al 2013	Koga et al 2013A
Hemiptera_Aphrophoridae	Hemiptera	Aphrophoridae	Candidatus Sulcia muelleri	Candidatus_Sulcia_muelleri_of_Aphrophoridae	yes	cosegragation	yes	Ptyelus	grossus			xylem	xylem	intra	Prokaryota		yes	no	no			Horsfield 1978 Dem et al 2013	Horsfield 1978 Dem et al 2013	Koga et al 2013A
Hemiptera_Aphrophoridae	Hemiptera	Aphrophoridae	Candidatus Sulcia muelleri	Candidatus_Sulcia_muelleri_of_Aphrophoridae	yes	cosegragation	yes	Neophilaenus	lineatus			xylem	xylem	intra	Prokaryota		yes	no	no			Horsfield 1978 Dem et al 2013	Horsfield 1978 Dem et al 2013	Koga et al 2013A
Hemiptera_Aphrophoridae	Hemiptera	Aphrophoridae	Candidatus Sulcia muelleri	Candidatus_Sulcia_muelleri_of_Aphrophoridae	yes	cosegragation	yes	Philaenus	maghresignus			xylem	xylem	intra	Prokaryota		yes	no	no			Horsfield 1978 Dem et al 2013	Horsfield 1978 Dem et al 2013	Koga et al 2013A
Hemiptera_Aphrophoridae	Hemiptera	Aphrophoridae	Candidatus Sulcia muelleri	Candidatus_Sulcia_muelleri_of_Aphrophoridae	yes	cosegragation	yes	Aphrophora	quadrinotata			xylem	xylem	intra	Prokaryota		yes	no	no			Horsfield 1978 Dem et al 2013	Horsfield 1978 Dem et al 2013	Koga et al 2013A
Hemiptera_Aphrophoridae	Hemiptera	Aphrophoridae	Candidatus Sulcia muelleri	Candidatus_Sulcia_muelleri_of_Aphrophoridae	yes	cosegragation	yes	Cephisus	siccifolius			xylem	xylem	intra	Prokaryota		yes	no	no			Horsfield 1978 Dem et al 2013	Horsfield 1978 Dem et al 2013	Koga et al 2013A
Hemiptera_Aphrophoridae	Hemiptera	Aphrophoridae	Candidatus Sulcia muelleri	Candidatus_Sulcia_muelleri_of_Aphrophoridae	yes	cosegragation	yes	Clovia	sp			xylem	xylem	intra	Prokaryota		yes	no	no			Horsfield 1978 Dem et al 2013	Horsfield 1978 Dem et al 2013	Koga et al 2013A
Hemiptera_Aphrophoridae	Hemiptera	Aphrophoridae	Candidatus Sulcia muelleri	Candidatus_Sulcia_muelleri_of_Aphrophoridae	yes	cosegragation	yes	Philagra	sp			xylem	xylem	intra	Prokaryota		yes	no	no			Horsfield 1978 Dem et al 2013	Horsfield 1978 Dem et al 2013	Koga et al 2013A
Hemiptera_Aphrophoridae	Hemiptera	Aphrophoridae	Candidatus Sulcia muelleri	Candidatus_Sulcia_muelleri_of_Aphrophoridae	yes	cosegragation	yes	Philaenus	tesselatus			xylem	xylem	intra	Prokaryota		yes	no	no			Horsfield 1978 Dem et al 2013	Horsfield 1978 Dem et al 2013	Koga et al 2013A
Hemiptera_Aphrophoridae	Hemiptera	Aphrophoridae	Candidatus Zinderia insecticola	Candidatus_Zinderia_insecticola_of_Aphrophoridae	yes	cosegragation	yes	Lepyronia	coleoptrata			xylem	xylem	intra	Prokaryota		yes	no	no			Horsfield 1978 Dem et al 2013	Horsfield 1978 Dem et al 2013	Koga et al 2013A
Hemiptera_Aphrophoridae	Hemiptera	Aphrophoridae	Candidatus Zinderia insecticola	Candidatus_Zinderia_insecticola_of_Aphrophoridae	yes	cosegragation	yes	Aphrophora	quadrinotata			xylem	xylem	intra	Prokaryota		yes	no	no			Horsfield 1978 Dem et al 2013	Horsfield 1978 Dem et al 2013	Koga et al 2013A
Hemiptera_Aphrophoridae	Hemiptera	Aphrophoridae	Candidatus Zinderia insecticola	Candidatus_Zinderia_insecticola_of_Aphrophoridae	yes	cosegragation	yes	Cephisus	siccifolius			xylem	xylem	intra	Prokaryota		yes	no	no			Horsfield 1978 Dem et al 2013	Horsfield 1978 Dem et al 2013	Koga et al 2013A
Hemiptera_Aphrophoridae	Hemiptera	Aphrophoridae	Candidatus Zinderia insecticola	Candidatus_Zinderia_insecticola_of_Aphrophoridae	yes	cosegragation	yes	Clovia	sp			xylem	xylem	intra	Prokaryota		yes	no	no			Horsfield 1978 Dem et al 2013	Horsfield 1978 Dem et al 2013	Koga et al 2013A
Hemiptera_Aphrophoridae	Hemiptera	Aphrophoridae	Candidatus Zinderia insecticola	Candidatus_Zinderia_insecticola_of_Aphrophoridae	yes	cosegragation	yes	Philagra	sp			xylem	xylem	intra	Prokaryota		yes	no	no			Horsfield 1978 Dem et al 2013	Horsfield 1978 Dem et al 2013	Koga et al 2013A
Hemiptera_Aphrophoridae	Hemiptera	Aphrophoridae	Candidatus Zinderia insecticola	Candidatus_Zinderia_insecticola_of_Aphrophoridae	yes	cosegragation	yes	Microsargane	vittata			xylem	xylem	intra	Prokaryota		yes	no	no			Horsfield 1978 Dem et al 2013	Horsfield 1978 Dem et al 2013	Koga et al 2013A
Hemiptera_Aradidae	Hemiptera	Aradidae	none known		none known		no	gen	sp			fungi	fungi				yes	no	no			Coscarón and Contreras 2015	Coscarón and Contreras 2015	Schneider 1939	Schneider 1939
Hemiptera_Berytidae	Hemiptera	Berytidae	Burkholdaria														no	no	no					Kikuchi et al 2011 Matsuura et al 2012B Schneider 1939
Hemiptera_Blissidae	Hemiptera	Blissidae	Burkholdaria														no	no	no					Kikuchi et al 2011
Hemiptera_Blissidae	Hemiptera	Blissidae	Candidatus Ischnodemia utricula	Symbiont_of_Ischnodemia_utricula	yes		yes	Ischnodemus	sabuleti			phloem	phloem	intra	Prokaryota		yes	yes	yes			Slater 1976	Slater 1976	Kuechler et al 2012	Kuechler et al 2012
Hemiptera_Caliscelidae	Hemiptera	Caliscelidae	Candidatus Sulcia muelleri		yes	cosegragation	yes	Caliscelis	bonellii			phloem	phloem	intra	Prokaryota		yes	no	no			Novotny and Wilson 1997	Novotny and Wilson 1997	Müller 1962	Müller 1962
Hemiptera_Caliscelidae	Hemiptera	Caliscelidae	Candidatus Sulcia muelleri		yes	cosegragation	yes	Bruchomorpha	sp			phloem	phloem	intra	Prokaryota		yes	no	no			Novotny and Wilson 1997	Novotny and Wilson 1997	Müller 1962	Müller 1962
Hemiptera_Calophyidae	Hemiptera	Calophyidae	Candidatus Carsonella ruddii	Candidatus_Carsonella_ruddii_of_Calophya_schini	yes	cosegragation	yes	Calophya	schini			phloem	phloem	intra	Prokaryota		yes	no	yes			Hodkinson 1974 Overhold 2015	Hodkinson 1974 Overhold 2015	Thao et al 2000	Thao et al 2000
Hemiptera_Cercopidae	Hemiptera	Cercopidae	Candidatus Sulcia muelleri	Candidatus_Sulcia_muelleri_Cercopidae_Prosapia	yes	cosegragation	yes	Cosmoscarta	abdominalis (heros)			xylem	xylem	intra	Prokaryota		yes	no	no			Novotny and Wilson 1997 Raven 1983	Novotny and Wilson 1997 Raven 1983	Koga et al 2013A
Hemiptera_Cercopidae	Hemiptera	Cercopidae	Candidatus Sulcia muelleri	Candidatus_Sulcia_muelleri_Cercopidae_Prosapia	yes	cosegragation	yes	Prosapia	bicincta			xylem	xylem	intra	Prokaryota		yes	no	no			Novotny and Wilson 1997 Raven 1983	Novotny and Wilson 1997 Raven 1983	Koga et al 2013A
Hemiptera_Cercopidae	Hemiptera	Cercopidae	Candidatus Sulcia muelleri	Candidatus_Sulcia_muelleri_Cercopidae_Prosapia	yes	cosegragation	yes	Euryaulax	carnifex			xylem	xylem	intra	Prokaryota		yes	no	no			Novotny and Wilson 1997 Raven 1983	Novotny and Wilson 1997 Raven 1983	Koga et al 2013A
Hemiptera_Cercopidae	Hemiptera	Cercopidae	Candidatus Sulcia muelleri	Candidatus_Sulcia_muelleri_Cercopidae_Prosapia	yes	cosegragation	yes	Aeneolamia	contigua			xylem	xylem	intra	Prokaryota		yes	no	no			Novotny and Wilson 1997 Raven 1983	Novotny and Wilson 1997 Raven 1983	Koga et al 2013A
Hemiptera_Cercopidae	Hemiptera	Cercopidae	Candidatus Sulcia muelleri	Candidatus_Sulcia_muelleri_Cercopidae_Prosapia	yes	cosegragation	yes	Maxantonia	diversa			xylem	xylem	intra	Prokaryota		yes	no	no			Novotny and Wilson 1997 Raven 1983	Novotny and Wilson 1997 Raven 1983	Koga et al 2013A
Hemiptera_Cercopidae	Hemiptera	Cercopidae	Candidatus Sulcia muelleri	Candidatus_Sulcia_muelleri_Cercopidae_Prosapia	yes	cosegragation	yes	Huaina	inca			xylem	xylem	intra	Prokaryota		yes	no	no			Novotny and Wilson 1997 Raven 1983	Novotny and Wilson 1997 Raven 1983	Koga et al 2013A
Hemiptera_Cercopidae	Hemiptera	Cercopidae	Candidatus Sulcia muelleri	Candidatus_Sulcia_muelleri_Cercopidae_Prosapia	yes	cosegragation	yes	Machadoa	invenusta			xylem	xylem	intra	Prokaryota		yes	no	no			Novotny and Wilson 1997 Raven 1983	Novotny and Wilson 1997 Raven 1983	Koga et al 2013A
Hemiptera_Cercopidae	Hemiptera	Cercopidae	Candidatus Sulcia muelleri	Candidatus_Sulcia_muelleri_Cercopidae_Prosapia	yes	cosegragation	yes	Ocoaxo	lineatus			xylem	xylem	intra	Prokaryota		yes	no	no			Novotny and Wilson 1997 Raven 1983	Novotny and Wilson 1997 Raven 1983	Koga et al 2013A
Hemiptera_Cercopidae	Hemiptera	Cercopidae	Candidatus Sulcia muelleri	Candidatus_Sulcia_muelleri_Cercopidae_Prosapia	yes	cosegragation	yes	Locris	maculata			xylem	xylem	intra	Prokaryota		yes	no	no			Novotny and Wilson 1997 Raven 1983	Novotny and Wilson 1997 Raven 1983	Koga et al 2013A
Hemiptera_Cercopidae	Hemiptera	Cercopidae	Candidatus Sulcia muelleri	Candidatus_Sulcia_muelleri_Cercopidae_Prosapia	yes	cosegragation	yes	Baetkia	maroniensis			xylem	xylem	intra	Prokaryota		yes	no	no			Novotny and Wilson 1997 Raven 1983	Novotny and Wilson 1997 Raven 1983	Koga et al 2013A
Hemiptera_Cercopidae	Hemiptera	Cercopidae	Candidatus Sulcia muelleri	Candidatus_Sulcia_muelleri_Cercopidae_Prosapia	yes	cosegragation	yes	Aufidus	trifasciatus			xylem	xylem	intra	Prokaryota		yes	no	no			Novotny and Wilson 1997 Raven 1983	Novotny and Wilson 1997 Raven 1983	Koga et al 2013A
Hemiptera_Cercopidae	Hemiptera	Cercopidae	Candidatus Sulcia muelleri	Candidatus_Sulcia_muelleri_Cercopidae_Prosapia	yes	cosegragation	yes	Clastoptera	arizonana			xylem	xylem	intra	Prokaryota		yes	no	no			Novotny and Wilson 1997 Raven 1983	Novotny and Wilson 1997 Raven 1983	Moran et al 2005	Moran et al 2005
Hemiptera_Cercopidae	Hemiptera	Cercopidae	Candidatus Zinderia insecticola	Candidatus_Zinderia_insecticola_of_Cercopidae	yes	cosegragation	yes	Prosapia	bicincta			xylem	xylem	intra	Prokaryota		yes	no	no			Novotny and Wilson 1997 Raven 1983	Novotny and Wilson 1997 Raven 1983	Koga et al 2013A
Hemiptera_Cercopidae	Hemiptera	Cercopidae	Candidatus Zinderia insecticola	Candidatus_Zinderia_insecticola_of_Cercopidae	yes	cosegragation	yes	Euryaulax	carnifex			xylem	xylem	intra	Prokaryota		yes	no	no			Novotny and Wilson 1997 Raven 1983	Novotny and Wilson 1997 Raven 1983	Koga et al 2013A
Hemiptera_Cercopidae	Hemiptera	Cercopidae	Candidatus Zinderia insecticola	Candidatus_Zinderia_insecticola_of_Cercopidae	yes	cosegragation	yes	Maxantonia	diversa			xylem	xylem	intra	Prokaryota		yes	no	no			Novotny and Wilson 1997 Raven 1983	Novotny and Wilson 1997 Raven 1983	Koga et al 2013A
Hemiptera_Cercopidae	Hemiptera	Cercopidae	Candidatus Zinderia insecticola	Candidatus_Zinderia_insecticola_of_Cercopidae	yes	cosegragation	yes	Huaina	inca			xylem	xylem	intra	Prokaryota		yes	no	no			Novotny and Wilson 1997 Raven 1983	Novotny and Wilson 1997 Raven 1983	Koga et al 2013A
Hemiptera_Cercopidae	Hemiptera	Cercopidae	Candidatus Zinderia insecticola	Candidatus_Zinderia_insecticola_of_Cercopidae	yes	cosegragation	yes	Machadoa	invenusta			xylem	xylem	intra	Prokaryota		yes	no	no			Novotny and Wilson 1997 Raven 1983	Novotny and Wilson 1997 Raven 1983	Koga et al 2013A
Hemiptera_Cercopidae	Hemiptera	Cercopidae	Candidatus Zinderia insecticola	Candidatus_Zinderia_insecticola_of_Cercopidae	yes	cosegragation	yes	Ocoaxo	lineatus			xylem	xylem	intra	Prokaryota		yes	no	no			Novotny and Wilson 1997 Raven 1983	Novotny and Wilson 1997 Raven 1983	Koga et al 2013A
Hemiptera_Cercopidae	Hemiptera	Cercopidae	Candidatus Zinderia insecticola	Candidatus_Zinderia_insecticola_of_Cercopidae	yes	cosegragation	yes	Locris	maculata			xylem	xylem	intra	Prokaryota		yes	no	no			Novotny and Wilson 1997 Raven 1983	Novotny and Wilson 1997 Raven 1983	Koga et al 2013A
Hemiptera_Cercopidae	Hemiptera	Cercopidae	Candidatus Zinderia insecticola	Candidatus_Zinderia_insecticola_of_Cercopidae	yes	cosegragation	yes	Baetkia	maroniensis			xylem	xylem	intra	Prokaryota		yes	no	no			Novotny and Wilson 1997 Raven 1983	Novotny and Wilson 1997 Raven 1983	Koga et al 2013A
Hemiptera_Cercopidae	Hemiptera	Cercopidae	Candidatus Zinderia insecticola	Candidatus_Zinderia_insecticola_of_Cercopidae	yes	cosegragation	yes	Aufidus	trifasciatus			xylem	xylem	intra	Prokaryota		yes	no	no			Novotny and Wilson 1997 Raven 1983	Novotny and Wilson 1997 Raven 1983	Koga et al 2013A
Hemiptera_Cicadellidae	Hemiptera	Cicadellidae	Bacteroidetes		yes		yes	Excultanus	sp			phloem	phloem	intra	Prokaryota		yes	no	no			Novotny and Wilson 1997 Raven 1983	Novotny and Wilson 1997 Raven 1983	Moran et al 2005
Hemiptera_Cicadellidae	Hemiptera	Cicadellidae	Candidatus Baumannia cicadellinicola	Candidatus_Baumannia_cicadellinicola_of_Graphocephala_atropunctata	yes	cosegragation	yes	Homalodisca	vitripennis (coagulata)	xylem	xylem			intra	Prokaryota		yes	yes	no	Novotny and Wilson 1997	Novotny and Wilson 1997			Moran et al 2003	Moran et al 2003
Hemiptera_Cicadellidae	Hemiptera	Cicadellidae	Candidatus Baumannia cicadellinicola	Candidatus_Baumannia_cicadellinicola_of_Graphocephala_atropunctata	yes	cosegragation	yes	Graphocephala	aurora	xylem	xylem			intra	Prokaryota		yes	yes	no	Novotny and Wilson 1997	Novotny and Wilson 1997			Moran et al 2003
Hemiptera_Cicadellidae	Hemiptera	Cicadellidae	Candidatus Baumannia cicadellinicola	Candidatus_Baumannia_cicadellinicola_of_Graphocephala_atropunctata	yes	cosegragation	yes	Graphocephala	cythura	xylem	xylem			intra	Prokaryota		yes	yes	no	Novotny and Wilson 1997	Novotny and Wilson 1997			Moran et al 2003
Hemiptera_Cicadellidae	Hemiptera	Cicadellidae	Candidatus Baumannia cicadellinicola	Candidatus_Baumannia_cicadellinicola_of_Graphocephala_atropunctata	yes	cosegragation	yes	Graphocephala	hieroglyphica	xylem	xylem			intra	Prokaryota		yes	yes	no	Novotny and Wilson 1997	Novotny and Wilson 1997			Moran et al 2003
Hemiptera_Cicadellidae	Hemiptera	Cicadellidae	Candidatus Baumannia cicadellinicola	Candidatus_Baumannia_cicadellinicola_of_Graphocephala_atropunctata	yes	cosegragation	yes	Homalodisca	lacerta	xylem	xylem			intra	Prokaryota		yes	yes	no	Novotny and Wilson 1997	Novotny and Wilson 1997			Moran et al 2003
Hemiptera_Cicadellidae	Hemiptera	Cicadellidae	Candidatus Nasuia		yes		yes	Macrosteles	quadrilineatus			phloem	phloem	intra	Prokaryota		yes	no	no			Novotny and Wilson 1997 Raven 1983	Novotny and Wilson 1997 Raven 1983	Bennett and Moran 2013	Bennett and Moran 2013
Hemiptera_Cicadellidae	Hemiptera	Cicadellidae	Candidatus Nasuia		yes		yes	Macrosteles	sexnotatus			phloem	phloem	intra	Prokaryota		yes	no	no			Novotny and Wilson 1997 Raven 1983	Novotny and Wilson 1997 Raven 1983	Ishii et al 2013	Ishii et al 2013
Hemiptera_Cicadellidae	Hemiptera	Cicadellidae	Candidatus Nasuia		yes		yes	Macrosteles	striifrons			phloem	phloem	intra	Prokaryota		yes	no	no			Novotny and Wilson 1997 Raven 1983	Novotny and Wilson 1997 Raven 1983	Ishii et al 2013	Ishii et al 2013
Hemiptera_Cicadellidae	Hemiptera	Cicadellidae	Candidatus Nasuia		yes		yes	Nephotettix	cincticeps			phloem	phloem	intra	Prokaryota		yes	no	no			Novotny and Wilson 1997 Raven 1983	Novotny and Wilson 1997 Raven 1983	Noda et al 2012	Noda et al 2012
Hemiptera_Cicadellidae	Hemiptera	Cicadellidae	Candidatus Sodalis pierantonius	Sodalis_endosymbiont_of_Cicadella_vir	yes		yes	Cicadella	viridis	xylem	xylem			intra	Prokaryota		yes	yes	no	Novotny and Wilson 1997	Novotny and Wilson 1997			Michalik et al 2014	Michalik et al 2014
Hemiptera_Cicadellidae	Hemiptera	Cicadellidae	Candidatus Sulcia muelleri	Candidatus_Sulcia_muelleri_of_Cicadellidae_Homalodisca	yes	cosegragation	yes	Macrosteles	quadrilineatus			phloem	phloem	intra	Prokaryota		yes	no	no			Novotny and Wilson 1997 Raven 1983	Novotny and Wilson 1997 Raven 1983	Bennett and Moran 2013	Bennett and Moran 2013
Hemiptera_Cicadellidae	Hemiptera	Cicadellidae	Candidatus Sulcia muelleri	Candidatus_Sulcia_muelleri_of_Cicadellidae_Homalodisca	yes	cosegragation	yes	Macrosteles	sexnotatus			phloem	phloem	intra	Prokaryota		yes	no	no			Novotny and Wilson 1997 Raven 1983	Novotny and Wilson 1997 Raven 1983	Ishii et al 2013	Ishii et al 2013
Hemiptera_Cicadellidae	Hemiptera	Cicadellidae	Candidatus Sulcia muelleri	Candidatus_Sulcia_muelleri_of_Cicadellidae_Homalodisca	yes	cosegragation	yes	Macrosteles	striifrons			phloem	phloem	intra	Prokaryota		yes	no	no			Novotny and Wilson 1997 Raven 1983	Novotny and Wilson 1997 Raven 1983	Ishii et al 2013	Ishii et al 2013
Hemiptera_Cicadellidae	Hemiptera	Cicadellidae	Candidatus Sulcia muelleri	Candidatus_Sulcia_muelleri_of_Cicadellidae_Homalodisca	yes	cosegragation	yes	Deltocephalus	flavicosta			phloem	phloem	intra	Prokaryota		yes	no	no			Novotny and Wilson 1997 Raven 1983	Novotny and Wilson 1997 Raven 1983	Koga et al 2013A	Koga et al 2013A
Hemiptera_Cicadellidae	Hemiptera	Cicadellidae	Candidatus Sulcia muelleri	Candidatus_Sulcia_muelleri_of_Cicadellidae_Homalodisca	yes	cosegragation	yes	Graphocephala	cythura	xylem	xylem			intra	Prokaryota		yes	no	no	Novotny and Wilson 1997	Novotny and Wilson 1997			Moran et al 2003
Hemiptera_Cicadellidae	Hemiptera	Cicadellidae	Candidatus Sulcia muelleri	Candidatus_Sulcia_muelleri_of_Cicadellidae_Homalodisca	yes	cosegragation	yes	Homalodisca	vitripennis (coagulata)	xylem	xylem	phloem	phloem	intra	Prokaryota		yes	no	no	Novotny and Wilson 1997	Novotny and Wilson 1997	Novotny and Wilson 1997 Raven 1983	Novotny and Wilson 1997 Raven 1983	Moran et al 2005
Hemiptera_Cicadellidae	Hemiptera	Cicadellidae	Candidatus Sulcia muelleri	Candidatus_Sulcia_muelleri_of_Cicadellidae_Homalodisca	yes	cosegragation	yes	Hamana	dictatoria			phloem	phloem	intra	Prokaryota		yes	no	no			Novotny and Wilson 1997 Raven 1983	Novotny and Wilson 1997 Raven 1983	Moran et al 2005
Hemiptera_Cicadellidae	Hemiptera	Cicadellidae	Candidatus Sulcia muelleri	Candidatus_Sulcia_muelleri_of_Cicadellidae_Homalodisca	yes	cosegragation	yes	Paromenia	isabellina			phloem	phloem	intra	Prokaryota		yes	no	no			Novotny and Wilson 1997 Raven 1983	Novotny and Wilson 1997 Raven 1983	Moran et al 2005
Hemiptera_Cicadellidae	Hemiptera	Cicadellidae	Candidatus Sulcia muelleri	Candidatus_Sulcia_muelleri_of_Cicadellidae_Homalodisca	yes	cosegragation	yes	Jikradia	olitoria			phloem	phloem	intra	Prokaryota		yes	no	no			Novotny and Wilson 1997 Raven 1983	Novotny and Wilson 1997 Raven 1983	Moran et al 2005
Hemiptera_Cicadellidae	Hemiptera	Cicadellidae	Candidatus Sulcia muelleri	Candidatus_Sulcia_muelleri_of_Cicadellidae_Homalodisca	yes	cosegragation	yes	Acinopterus	sp			phloem	phloem	intra	Prokaryota		yes	no	no			Novotny and Wilson 1997 Raven 1983	Novotny and Wilson 1997 Raven 1983	Moran et al 2005
Hemiptera_Cicadellidae	Hemiptera	Cicadellidae	Candidatus Sulcia muelleri	Candidatus_Sulcia_muelleri_of_Cicadellidae_Homalodisca	yes	cosegragation	yes	Eupelicinae	sp1			phloem	phloem	intra	Prokaryota		yes	no	no			Novotny and Wilson 1997 Raven 1983	Novotny and Wilson 1997 Raven 1983	Müller 1962	Müller 1962
Hemiptera_Cicadellidae	Hemiptera	Cicadellidae	Candidatus Sulcia muelleri	Candidatus_Sulcia_muelleri_of_Cicadellidae_Homalodisca	yes	cosegragation	yes	Megophthalminae	sp1			phloem	phloem	intra	Prokaryota		yes	no	no			Novotny and Wilson 1997 Raven 1983	Novotny and Wilson 1997 Raven 1983	Müller 1962	Müller 1962
Hemiptera_Cicadellidae	Hemiptera	Cicadellidae	Candidatus Sulcia muelleri	Candidatus_Sulcia_muelleri_of_Cicadellidae_Homalodisca	yes	cosegragation	yes	Penthimiini	sp1			phloem	phloem	intra	Prokaryota		yes	no	no			Novotny and Wilson 1997 Raven 1983	Novotny and Wilson 1997 Raven 1983	Müller 1962	Müller 1962
Hemiptera_Cicadellidae	Hemiptera	Cicadellidae	Candidatus Sulcia muelleri	Candidatus_Sulcia_muelleri_of_Cicadellidae_Homalodisca	yes	cosegragation	yes	Euscelini	sp10			phloem	phloem	intra	Prokaryota		yes	no	no			Novotny and Wilson 1997 Raven 1983	Novotny and Wilson 1997 Raven 1983	Müller 1962	Müller 1962
Hemiptera_Cicadellidae	Hemiptera	Cicadellidae	Candidatus Sulcia muelleri	Candidatus_Sulcia_muelleri_of_Cicadellidae_Homalodisca	yes	cosegragation	yes	Euscelini	sp11			phloem	phloem	intra	Prokaryota		yes	no	no			Novotny and Wilson 1997 Raven 1983	Novotny and Wilson 1997 Raven 1983	Müller 1962	Müller 1962
Hemiptera_Cicadellidae	Hemiptera	Cicadellidae	Candidatus Sulcia muelleri	Candidatus_Sulcia_muelleri_of_Cicadellidae_Homalodisca	yes	cosegragation	yes	Euscelini	sp12			phloem	phloem	intra	Prokaryota		yes	no	no			Novotny and Wilson 1997 Raven 1983	Novotny and Wilson 1997 Raven 1983	Müller 1962	Müller 1962
Hemiptera_Cicadellidae	Hemiptera	Cicadellidae	Candidatus Sulcia muelleri	Candidatus_Sulcia_muelleri_of_Cicadellidae_Homalodisca	yes	cosegragation	yes	Euscelini	sp13			phloem	phloem	intra	Prokaryota		yes	no	no			Novotny and Wilson 1997 Raven 1983	Novotny and Wilson 1997 Raven 1983	Müller 1962	Müller 1962
Hemiptera_Cicadellidae	Hemiptera	Cicadellidae	Candidatus Sulcia muelleri	Candidatus_Sulcia_muelleri_of_Cicadellidae_Homalodisca	yes	cosegragation	yes	Euscelini	sp14			phloem	phloem	intra	Prokaryota		yes	no	no			Novotny and Wilson 1997 Raven 1983	Novotny and Wilson 1997 Raven 1983	Müller 1962	Müller 1962
Hemiptera_Cicadellidae	Hemiptera	Cicadellidae	Candidatus Sulcia muelleri	Candidatus_Sulcia_muelleri_of_Cicadellidae_Homalodisca	yes	cosegragation	yes	Macrostelini	sp15			phloem	phloem	intra	Prokaryota		yes	no	no			Novotny and Wilson 1997 Raven 1983	Novotny and Wilson 1997 Raven 1983	Müller 1962	Müller 1962
Hemiptera_Cicadellidae	Hemiptera	Cicadellidae	Candidatus Sulcia muelleri	Candidatus_Sulcia_muelleri_of_Cicadellidae_Homalodisca	yes	cosegragation	yes	Deltoeephalini	sp16			phloem	phloem	intra	Prokaryota		yes	no	no			Novotny and Wilson 1997 Raven 1983	Novotny and Wilson 1997 Raven 1983	Müller 1962	Müller 1962
Hemiptera_Cicadellidae	Hemiptera	Cicadellidae	Candidatus Sulcia muelleri	Candidatus_Sulcia_muelleri_of_Cicadellidae_Homalodisca	yes	cosegragation	yes	Deltoeephalini	sp17			phloem	phloem	intra	Prokaryota		yes	no	no			Novotny and Wilson 1997 Raven 1983	Novotny and Wilson 1997 Raven 1983	Müller 1962	Müller 1962
Hemiptera_Cicadellidae	Hemiptera	Cicadellidae	Candidatus Sulcia muelleri	Candidatus_Sulcia_muelleri_of_Cicadellidae_Homalodisca	yes	cosegragation	yes	Deltoeephalini	sp18			phloem	phloem	intra	Prokaryota		yes	no	no			Novotny and Wilson 1997 Raven 1983	Novotny and Wilson 1997 Raven 1983	Müller 1962	Müller 1962
Hemiptera_Cicadellidae	Hemiptera	Cicadellidae	Candidatus Sulcia muelleri	Candidatus_Sulcia_muelleri_of_Cicadellidae_Homalodisca	yes	cosegragation	yes	Deltoeephalini	sp19			phloem	phloem	intra	Prokaryota		yes	no	no			Novotny and Wilson 1997 Raven 1983	Novotny and Wilson 1997 Raven 1983	Müller 1962	Müller 1962
Hemiptera_Cicadellidae	Hemiptera	Cicadellidae	Candidatus Sulcia muelleri	Candidatus_Sulcia_muelleri_of_Cicadellidae_Homalodisca	yes	cosegragation	yes	Aphrodinae	sp2			phloem	phloem	intra	Prokaryota		yes	no	no			Novotny and Wilson 1997 Raven 1983	Novotny and Wilson 1997 Raven 1983	Müller 1962	Müller 1962
Hemiptera_Cicadellidae	Hemiptera	Cicadellidae	Candidatus Sulcia muelleri	Candidatus_Sulcia_muelleri_of_Cicadellidae_Homalodisca	yes	cosegragation	yes	Grypotini	sp2			phloem	phloem	intra	Prokaryota		yes	no	no			Novotny and Wilson 1997 Raven 1983	Novotny and Wilson 1997 Raven 1983	Müller 1962	Müller 1962
Hemiptera_Cicadellidae	Hemiptera	Cicadellidae	Candidatus Sulcia muelleri	Candidatus_Sulcia_muelleri_of_Cicadellidae_Homalodisca	yes	cosegragation	yes	Jassinae	sp2			phloem	phloem	intra	Prokaryota		yes	no	no			Novotny and Wilson 1997 Raven 1983	Novotny and Wilson 1997 Raven 1983	Müller 1962	Müller 1962
Hemiptera_Cicadellidae	Hemiptera	Cicadellidae	Candidatus Sulcia muelleri	Candidatus_Sulcia_muelleri_of_Cicadellidae_Homalodisca	yes	cosegragation	yes	Deltoeephalini	sp20			phloem	phloem	intra	Prokaryota		yes	no	no			Novotny and Wilson 1997 Raven 1983	Novotny and Wilson 1997 Raven 1983	Müller 1962	Müller 1962
Hemiptera_Cicadellidae	Hemiptera	Cicadellidae	Candidatus Sulcia muelleri	Candidatus_Sulcia_muelleri_of_Cicadellidae_Homalodisca	yes	cosegragation	yes	Deltoeephalini	sp21			phloem	phloem	intra	Prokaryota		yes	no	no			Novotny and Wilson 1997 Raven 1983	Novotny and Wilson 1997 Raven 1983	Müller 1962	Müller 1962
Hemiptera_Cicadellidae	Hemiptera	Cicadellidae	Candidatus Sulcia muelleri	Candidatus_Sulcia_muelleri_of_Cicadellidae_Homalodisca	yes	cosegragation	yes	Deltoeephalini	sp22			phloem	phloem	intra	Prokaryota		yes	no	no			Novotny and Wilson 1997 Raven 1983	Novotny and Wilson 1997 Raven 1983	Müller 1962	Müller 1962
Hemiptera_Cicadellidae	Hemiptera	Cicadellidae	Candidatus Sulcia muelleri	Candidatus_Sulcia_muelleri_of_Cicadellidae_Homalodisca	yes	cosegragation	yes	Deltoeephalini	sp23			phloem	phloem	intra	Prokaryota		yes	no	no			Novotny and Wilson 1997 Raven 1983	Novotny and Wilson 1997 Raven 1983	Müller 1962	Müller 1962
Hemiptera_Cicadellidae	Hemiptera	Cicadellidae	Candidatus Sulcia muelleri	Candidatus_Sulcia_muelleri_of_Cicadellidae_Homalodisca	yes	cosegragation	yes	Deltoeephalini	sp24			phloem	phloem	intra	Prokaryota		yes	no	no			Novotny and Wilson 1997 Raven 1983	Novotny and Wilson 1997 Raven 1983	Müller 1962	Müller 1962
Hemiptera_Cicadellidae	Hemiptera	Cicadellidae	Candidatus Sulcia muelleri	Candidatus_Sulcia_muelleri_of_Cicadellidae_Homalodisca	yes	cosegragation	yes	Deltoeephalini	sp25			phloem	phloem	intra	Prokaryota		yes	no	no			Novotny and Wilson 1997 Raven 1983	Novotny and Wilson 1997 Raven 1983	Müller 1962	Müller 1962
Hemiptera_Cicadellidae	Hemiptera	Cicadellidae	Candidatus Sulcia muelleri	Candidatus_Sulcia_muelleri_of_Cicadellidae_Homalodisca	yes	cosegragation	yes	Deltoeephalini	sp26			phloem	phloem	intra	Prokaryota		yes	no	no			Novotny and Wilson 1997 Raven 1983	Novotny and Wilson 1997 Raven 1983	Müller 1962	Müller 1962
Hemiptera_Cicadellidae	Hemiptera	Cicadellidae	Candidatus Sulcia muelleri	Candidatus_Sulcia_muelleri_of_Cicadellidae_Homalodisca	yes	cosegragation	yes	Deltoeephalini	sp27			phloem	phloem	intra	Prokaryota		yes	no	no			Novotny and Wilson 1997 Raven 1983	Novotny and Wilson 1997 Raven 1983	Müller 1962	Müller 1962
Hemiptera_Cicadellidae	Hemiptera	Cicadellidae	Candidatus Sulcia muelleri	Candidatus_Sulcia_muelleri_of_Cicadellidae_Homalodisca	yes	cosegragation	yes	Deltoeephalini	sp28			phloem	phloem	intra	Prokaryota		yes	no	no			Novotny and Wilson 1997 Raven 1983	Novotny and Wilson 1997 Raven 1983	Müller 1962	Müller 1962
Hemiptera_Cicadellidae	Hemiptera	Cicadellidae	Candidatus Sulcia muelleri	Candidatus_Sulcia_muelleri_of_Cicadellidae_Homalodisca	yes	cosegragation	yes	Aphrodinae	sp3			phloem	phloem	intra	Prokaryota		yes	no	no			Novotny and Wilson 1997 Raven 1983	Novotny and Wilson 1997 Raven 1983	Müller 1962	Müller 1962
Hemiptera_Cicadellidae	Hemiptera	Cicadellidae	Candidatus Sulcia muelleri	Candidatus_Sulcia_muelleri_of_Cicadellidae_Homalodisca	yes	cosegragation	yes	Grypotini	sp3			phloem	phloem	intra	Prokaryota		yes	no	no			Novotny and Wilson 1997 Raven 1983	Novotny and Wilson 1997 Raven 1983	Müller 1962	Müller 1962
Hemiptera_Cicadellidae	Hemiptera	Cicadellidae	Candidatus Sulcia muelleri	Candidatus_Sulcia_muelleri_of_Cicadellidae_Homalodisca	yes	cosegragation	yes	Jassinae	sp3			phloem	phloem	intra	Prokaryota		yes	no	no			Novotny and Wilson 1997 Raven 1983	Novotny and Wilson 1997 Raven 1983	Müller 1962	Müller 1962
Hemiptera_Cicadellidae	Hemiptera	Cicadellidae	Candidatus Sulcia muelleri	Candidatus_Sulcia_muelleri_of_Cicadellidae_Homalodisca	yes	cosegragation	yes	Aphrodinae	sp4			phloem	phloem	intra	Prokaryota		yes	no	no			Novotny and Wilson 1997 Raven 1983	Novotny and Wilson 1997 Raven 1983	Müller 1962	Müller 1962
Hemiptera_Cicadellidae	Hemiptera	Cicadellidae	Candidatus Sulcia muelleri	Candidatus_Sulcia_muelleri_of_Cicadellidae_Homalodisca	yes	cosegragation	yes	Macropsinae	sp4			phloem	phloem	intra	Prokaryota		yes	no	no			Novotny and Wilson 1997 Raven 1983	Novotny and Wilson 1997 Raven 1983	Müller 1962	Müller 1962
Hemiptera_Cicadellidae	Hemiptera	Cicadellidae	Candidatus Sulcia muelleri	Candidatus_Sulcia_muelleri_of_Cicadellidae_Homalodisca	yes	cosegragation	yes	Scaphygopiini	sp4			phloem	phloem	intra	Prokaryota		yes	no	no			Novotny and Wilson 1997 Raven 1983	Novotny and Wilson 1997 Raven 1983	Müller 1962	Müller 1962
Hemiptera_Cicadellidae	Hemiptera	Cicadellidae	Candidatus Sulcia muelleri	Candidatus_Sulcia_muelleri_of_Cicadellidae_Homalodisca	yes	cosegragation	yes	Euscelini	sp5			phloem	phloem	intra	Prokaryota		yes	no	no			Novotny and Wilson 1997 Raven 1983	Novotny and Wilson 1997 Raven 1983	Müller 1962	Müller 1962
Hemiptera_Cicadellidae	Hemiptera	Cicadellidae	Candidatus Sulcia muelleri	Candidatus_Sulcia_muelleri_of_Cicadellidae_Homalodisca	yes	cosegragation	yes	Evacanthinae	sp5			phloem	phloem	intra	Prokaryota		yes	no	no			Novotny and Wilson 1997 Raven 1983	Novotny and Wilson 1997 Raven 1983	Müller 1962	Müller 1962
Hemiptera_Cicadellidae	Hemiptera	Cicadellidae	Candidatus Sulcia muelleri	Candidatus_Sulcia_muelleri_of_Cicadellidae_Homalodisca	yes	cosegragation	yes	Idiocerinae	sp5			phloem	phloem	intra	Prokaryota		yes	no	no			Novotny and Wilson 1997 Raven 1983	Novotny and Wilson 1997 Raven 1983	Müller 1962	Müller 1962
Hemiptera_Cicadellidae	Hemiptera	Cicadellidae	Candidatus Sulcia muelleri	Candidatus_Sulcia_muelleri_of_Cicadellidae_Homalodisca	yes	cosegragation	yes	Cicadellinae	sp6			phloem	phloem	intra	Prokaryota		yes	no	no			Novotny and Wilson 1997 Raven 1983	Novotny and Wilson 1997 Raven 1983	Müller 1962	Müller 1962
Hemiptera_Cicadellidae	Hemiptera	Cicadellidae	Candidatus Sulcia muelleri	Candidatus_Sulcia_muelleri_of_Cicadellidae_Homalodisca	yes	cosegragation	yes	Euscelini	sp6			phloem	phloem	intra	Prokaryota		yes	no	no			Novotny and Wilson 1997 Raven 1983	Novotny and Wilson 1997 Raven 1983	Müller 1962	Müller 1962
Hemiptera_Cicadellidae	Hemiptera	Cicadellidae	Candidatus Sulcia muelleri	Candidatus_Sulcia_muelleri_of_Cicadellidae_Homalodisca	yes	cosegragation	yes	Idiocerinae	sp6			phloem	phloem	intra	Prokaryota		yes	no	no			Novotny and Wilson 1997 Raven 1983	Novotny and Wilson 1997 Raven 1983	Müller 1962	Müller 1962
Hemiptera_Cicadellidae	Hemiptera	Cicadellidae	Candidatus Sulcia muelleri	Candidatus_Sulcia_muelleri_of_Cicadellidae_Homalodisca	yes	cosegragation	yes	Cicadellinae	sp7			phloem	phloem	intra	Prokaryota		yes	no	no			Novotny and Wilson 1997 Raven 1983	Novotny and Wilson 1997 Raven 1983	Müller 1962	Müller 1962
Hemiptera_Cicadellidae	Hemiptera	Cicadellidae	Candidatus Sulcia muelleri	Candidatus_Sulcia_muelleri_of_Cicadellidae_Homalodisca	yes	cosegragation	yes	Euscelini	sp7			phloem	phloem	intra	Prokaryota		yes	no	no			Novotny and Wilson 1997 Raven 1983	Novotny and Wilson 1997 Raven 1983	Müller 1962	Müller 1962
Hemiptera_Cicadellidae	Hemiptera	Cicadellidae	Candidatus Sulcia muelleri	Candidatus_Sulcia_muelleri_of_Cicadellidae_Homalodisca	yes	cosegragation	yes	Idiocerinae	sp7			phloem	phloem	intra	Prokaryota		yes	no	no			Novotny and Wilson 1997 Raven 1983	Novotny and Wilson 1997 Raven 1983	Müller 1962	Müller 1962
Hemiptera_Cicadellidae	Hemiptera	Cicadellidae	Candidatus Sulcia muelleri	Candidatus_Sulcia_muelleri_of_Cicadellidae_Homalodisca	yes	cosegragation	yes	Cicadellinae	sp8			phloem	phloem	intra	Prokaryota		yes	no	no			Novotny and Wilson 1997 Raven 1983	Novotny and Wilson 1997 Raven 1983	Müller 1962	Müller 1962
Hemiptera_Cicadellidae	Hemiptera	Cicadellidae	Candidatus Sulcia muelleri	Candidatus_Sulcia_muelleri_of_Cicadellidae_Homalodisca	yes	cosegragation	yes	Euscelini	sp8			phloem	phloem	intra	Prokaryota		yes	no	no			Novotny and Wilson 1997 Raven 1983	Novotny and Wilson 1997 Raven 1983	Müller 1962	Müller 1962
Hemiptera_Cicadellidae	Hemiptera	Cicadellidae	Candidatus Sulcia muelleri	Candidatus_Sulcia_muelleri_of_Cicadellidae_Homalodisca	yes	cosegragation	yes	Idiocerinae	sp8			phloem	phloem	intra	Prokaryota		yes	no	no			Novotny and Wilson 1997 Raven 1983	Novotny and Wilson 1997 Raven 1983	Müller 1962	Müller 1962
Hemiptera_Cicadellidae	Hemiptera	Cicadellidae	Candidatus Sulcia muelleri	Candidatus_Sulcia_muelleri_of_Cicadellidae_Homalodisca	yes	cosegragation	yes	Agalliinae	sp9			phloem	phloem	intra	Prokaryota		yes	no	no			Novotny and Wilson 1997 Raven 1983	Novotny and Wilson 1997 Raven 1983	Müller 1962	Müller 1962
Hemiptera_Cicadellidae	Hemiptera	Cicadellidae	Candidatus Sulcia muelleri	Candidatus_Sulcia_muelleri_of_Cicadellidae_Homalodisca	yes	cosegragation	yes	Euscelini	sp9			phloem	phloem	intra	Prokaryota		yes	no	no			Novotny and Wilson 1997 Raven 1983	Novotny and Wilson 1997 Raven 1983	Müller 1962	Müller 1962
Hemiptera_Cicadellidae	Hemiptera	Cicadellidae	Candidatus Sulcia muelleri	Candidatus_Sulcia_muelleri_of_Cicadellidae_Homalodisca	yes	cosegragation	yes	Ledropsis	discolor			phloem	phloem	intra	Prokaryota		yes	no	no			Novotny and Wilson 1997 Raven 1983	Novotny and Wilson 1997 Raven 1983	Nishino et al 2016	Nishino et al 2016
Hemiptera_Cicadellidae	Hemiptera	Cicadellidae	Fungi		yes		yes	Tituria	angulata			phloem	phloem	intra	Eukaryota		yes	no	no			Novotny and Wilson 1997 Raven 1983	Novotny and Wilson 1997 Raven 1983	Nishino et al 2016	Nishino et al 2016
Hemiptera_Cicadellidae	Hemiptera	Cicadellidae	Fungi		yes		yes	Ledropsis	audiata			phloem	phloem	intra	Eukaryota		yes	no	no			Novotny and Wilson 1997 Raven 1983	Novotny and Wilson 1997 Raven 1983	Nishino et al 2016	Nishino et al 2016
Hemiptera_Cicadellidae	Hemiptera	Cicadellidae	Fungi		yes		yes	Ledropsis	discolor			phloem	phloem	intra	Eukaryota		yes	no	no			Novotny and Wilson 1997 Raven 1983	Novotny and Wilson 1997 Raven 1983	Nishino et al 2016	Nishino et al 2016
Hemiptera_Cicadellidae	Hemiptera	Cicadellidae	H-symbiont														no	no	no					Müller 1962
Hemiptera_Cicadellidae	Hemiptera	Cicadellidae	none known		none known		no	Eupteryx	atropunctata	leaves (parenchyma)	leaves (parenchyma)						yes	no	no	Claridge and Wilson 1981 Putman 1941	Claridge and Wilson 1981 Putman 1941			Buchner 1925	Buchner 1925
Hemiptera_Cicadellidae	Hemiptera	Cicadellidae	none known		none known		no	Chlorita	sp	leaves (parenchyma)	leaves (parenchyma)						yes	no	no	Claridge and Wilson 1981 Putman 1941	Claridge and Wilson 1981 Putman 1941			Buchner 1925	Buchner 1925
Hemiptera_Cicadellidae	Hemiptera	Cicadellidae	none known		none known		no	Empoasca	sp	leaves (parenchyma)	leaves (parenchyma)						yes	no	no	Claridge and Wilson 1981 Putman 1941	Claridge and Wilson 1981 Putman 1941			Buchner 1925	Buchner 1925
Hemiptera_Cicadellidae	Hemiptera	Cicadellidae	none known		none known		no	Erythria	sp	leaves (parenchyma)	leaves (parenchyma)						yes	no	no	Claridge and Wilson 1981 Putman 1941	Claridge and Wilson 1981 Putman 1941			Buchner 1925	Buchner 1925
Hemiptera_Cicadellidae	Hemiptera	Cicadellidae	none known		none known		no	Eupteryx	stellulata	leaves (parenchyma)	leaves (parenchyma)						yes	no	no	Claridge and Wilson 1981 Putman 1941	Claridge and Wilson 1981 Putman 1941			Buchner 1925	Buchner 1925
Hemiptera_Cicadellidae	Hemiptera	Cicadellidae	none known		none known		no	Typhlocyba	rosae	leaves (parenchyma)	leaves (parenchyma)						yes	no	no	Novotny and Wilson 1997	Novotny and Wilson 1997			Buchner 1925	Buchner 1925
Hemiptera_Cicadellidae	Hemiptera	Cicadellidae	none known		none known		no	Typhlocyba	ulmi	leaves (parenchyma)	leaves (parenchyma)						yes	no	no	Novotny and Wilson 1997	Novotny and Wilson 1997			Buchner 1925	Buchner 1925
Hemiptera_Cicadellidae	Hemiptera	Cicadellidae	none known		none known		no	Typhlocybides	sp10	leaves (parenchyma)	leaves (parenchyma)						yes	no	no	Novotny and Wilson 1997	Novotny and Wilson 1997			Müller 1962	Müller 1962
Hemiptera_Cicadellidae	Hemiptera	Cicadellidae	none known		none known		no	Typhlocybides	sp11	leaves (parenchyma)	leaves (parenchyma)						yes	no	no	Novotny and Wilson 1997	Novotny and Wilson 1997			Müller 1962	Müller 1962
Hemiptera_Cicadellidae	Hemiptera	Cicadellidae	none known		none known		no	Typhlocybides	sp12	leaves (parenchyma)	leaves (parenchyma)						yes	no	no	Novotny and Wilson 1997	Novotny and Wilson 1997			Müller 1962	Müller 1962
Hemiptera_Cicadellidae	Hemiptera	Cicadellidae	none known		none known		no	Typhlocybides	sp13	leaves (parenchyma)	leaves (parenchyma)						yes	no	no	Novotny and Wilson 1997	Novotny and Wilson 1997			Müller 1962	Müller 1962
Hemiptera_Cicadellidae	Hemiptera	Cicadellidae	none known		none known		no	Typhlocybides	sp14	leaves (parenchyma)	leaves (parenchyma)						yes	no	no	Novotny and Wilson 1997	Novotny and Wilson 1997			Müller 1962	Müller 1962
Hemiptera_Cicadellidae	Hemiptera	Cicadellidae	none known		none known		no	Typhlocybides	sp15	leaves (parenchyma)	leaves (parenchyma)						yes	no	no	Novotny and Wilson 1997	Novotny and Wilson 1997			Müller 1962	Müller 1962
Hemiptera_Cicadellidae	Hemiptera	Cicadellidae	none known		none known		no	Typhlocybides	sp16	leaves (parenchyma)	leaves (parenchyma)						yes	no	no	Novotny and Wilson 1997	Novotny and Wilson 1997			Müller 1962	Müller 1962
Hemiptera_Cicadellidae	Hemiptera	Cicadellidae	none known		none known		no	Typhlocybides	sp17	leaves (parenchyma)	leaves (parenchyma)						yes	no	no	Novotny and Wilson 1997	Novotny and Wilson 1997			Müller 1962	Müller 1962
Hemiptera_Cicadellidae	Hemiptera	Cicadellidae	none known		none known		no	Typhlocybides	sp18	leaves (parenchyma)	leaves (parenchyma)						yes	no	no	Novotny and Wilson 1997	Novotny and Wilson 1997			Müller 1962	Müller 1962
Hemiptera_Cicadellidae	Hemiptera	Cicadellidae	none known		none known		no	Typhlocybides	sp19	leaves (parenchyma)	leaves (parenchyma)						yes	no	no	Novotny and Wilson 1997	Novotny and Wilson 1997			Müller 1962	Müller 1962
Hemiptera_Cicadellidae	Hemiptera	Cicadellidae	none known		none known		no	Typhlocybides	sp20	leaves (parenchyma)	leaves (parenchyma)						yes	no	no	Novotny and Wilson 1997	Novotny and Wilson 1997			Müller 1962	Müller 1962
Hemiptera_Cicadellidae	Hemiptera	Cicadellidae	T-symbiont		yes		yes	Eupelicinae	sp1			phloem	phloem	intra	Prokaryota		yes	no	no			Novotny and Wilson 1997 Raven 1983	Novotny and Wilson 1997 Raven 1983	Müller 1962	Müller 1962
Hemiptera_Cicadellidae	Hemiptera	Cicadellidae	T-symbiont		yes		yes	Megophthalminae	sp1			phloem	phloem	intra	Prokaryota		yes	no	no			Novotny and Wilson 1997 Raven 1983	Novotny and Wilson 1997 Raven 1983	Müller 1962	Müller 1962
Hemiptera_Cicadellidae	Hemiptera	Cicadellidae	T-symbiont		yes		yes	Euscelini	sp10			phloem	phloem	intra	Prokaryota		yes	no	no			Novotny and Wilson 1997 Raven 1983	Novotny and Wilson 1997 Raven 1983	Müller 1962	Müller 1962
Hemiptera_Cicadellidae	Hemiptera	Cicadellidae	T-symbiont		yes		yes	Euscelini	sp11			phloem	phloem	intra	Prokaryota		yes	no	no			Novotny and Wilson 1997 Raven 1983	Novotny and Wilson 1997 Raven 1983	Müller 1962	Müller 1962
Hemiptera_Cicadellidae	Hemiptera	Cicadellidae	T-symbiont		yes		yes	Euscelini	sp12			phloem	phloem	intra	Prokaryota		yes	no	no			Novotny and Wilson 1997 Raven 1983	Novotny and Wilson 1997 Raven 1983	Müller 1962	Müller 1962
Hemiptera_Cicadellidae	Hemiptera	Cicadellidae	T-symbiont		yes		yes	Euscelini	sp13			phloem	phloem	intra	Prokaryota		yes	no	no			Novotny and Wilson 1997 Raven 1983	Novotny and Wilson 1997 Raven 1983	Müller 1962	Müller 1962
Hemiptera_Cicadellidae	Hemiptera	Cicadellidae	T-symbiont		yes		yes	Macrostelini	sp15			phloem	phloem	intra	Prokaryota		yes	no	no			Novotny and Wilson 1997 Raven 1983	Novotny and Wilson 1997 Raven 1983	Müller 1962	Müller 1962
Hemiptera_Cicadellidae	Hemiptera	Cicadellidae	T-symbiont		yes		yes	Deltoeephalini	sp16			phloem	phloem	intra	Prokaryota		yes	no	no			Novotny and Wilson 1997 Raven 1983	Novotny and Wilson 1997 Raven 1983	Müller 1962	Müller 1962
Hemiptera_Cicadellidae	Hemiptera	Cicadellidae	T-symbiont		yes		yes	Deltoeephalini	sp17			phloem	phloem	intra	Prokaryota		yes	no	no			Novotny and Wilson 1997 Raven 1983	Novotny and Wilson 1997 Raven 1983	Müller 1962	Müller 1962
Hemiptera_Cicadellidae	Hemiptera	Cicadellidae	T-symbiont		yes		yes	Deltoeephalini	sp18			phloem	phloem	intra	Prokaryota		yes	no	no			Novotny and Wilson 1997 Raven 1983	Novotny and Wilson 1997 Raven 1983	Müller 1962	Müller 1962
Hemiptera_Cicadellidae	Hemiptera	Cicadellidae	T-symbiont		yes		yes	Deltoeephalini	sp19			phloem	phloem	intra	Prokaryota		yes	no	no			Novotny and Wilson 1997 Raven 1983	Novotny and Wilson 1997 Raven 1983	Müller 1962	Müller 1962
Hemiptera_Cicadellidae	Hemiptera	Cicadellidae	T-symbiont		yes		yes	Aphrodinae	sp2			phloem	phloem	intra	Prokaryota		yes	no	no			Novotny and Wilson 1997 Raven 1983	Novotny and Wilson 1997 Raven 1983	Müller 1962	Müller 1962
Hemiptera_Cicadellidae	Hemiptera	Cicadellidae	T-symbiont		yes		yes	Deltoeephalini	sp20			phloem	phloem	intra	Prokaryota		yes	no	no			Novotny and Wilson 1997 Raven 1983	Novotny and Wilson 1997 Raven 1983	Müller 1962	Müller 1962
Hemiptera_Cicadellidae	Hemiptera	Cicadellidae	T-symbiont		yes		yes	Deltoeephalini	sp21			phloem	phloem	intra	Prokaryota		yes	no	no			Novotny and Wilson 1997 Raven 1983	Novotny and Wilson 1997 Raven 1983	Müller 1962	Müller 1962
Hemiptera_Cicadellidae	Hemiptera	Cicadellidae	T-symbiont		yes		yes	Deltoeephalini	sp22			phloem	phloem	intra	Prokaryota		yes	no	no			Novotny and Wilson 1997 Raven 1983	Novotny and Wilson 1997 Raven 1983	Müller 1962	Müller 1962
Hemiptera_Cicadellidae	Hemiptera	Cicadellidae	T-symbiont		yes		yes	Deltoeephalini	sp23			phloem	phloem	intra	Prokaryota		yes	no	no			Novotny and Wilson 1997 Raven 1983	Novotny and Wilson 1997 Raven 1983	Müller 1962	Müller 1962
Hemiptera_Cicadellidae	Hemiptera	Cicadellidae	T-symbiont		yes		yes	Deltoeephalini	sp24			phloem	phloem	intra	Prokaryota		yes	no	no			Novotny and Wilson 1997 Raven 1983	Novotny and Wilson 1997 Raven 1983	Müller 1962	Müller 1962
Hemiptera_Cicadellidae	Hemiptera	Cicadellidae	T-symbiont		yes		yes	Deltoeephalini	sp25			phloem	phloem	intra	Prokaryota		yes	no	no			Novotny and Wilson 1997 Raven 1983	Novotny and Wilson 1997 Raven 1983	Müller 1962	Müller 1962
Hemiptera_Cicadellidae	Hemiptera	Cicadellidae	T-symbiont		yes		yes	Deltoeephalini	sp26			phloem	phloem	intra	Prokaryota		yes	no	no			Novotny and Wilson 1997 Raven 1983	Novotny and Wilson 1997 Raven 1983	Müller 1962	Müller 1962
Hemiptera_Cicadellidae	Hemiptera	Cicadellidae	T-symbiont		yes		yes	Deltoeephalini	sp27			phloem	phloem	intra	Prokaryota		yes	no	no			Novotny and Wilson 1997 Raven 1983	Novotny and Wilson 1997 Raven 1983	Müller 1962	Müller 1962
Hemiptera_Cicadellidae	Hemiptera	Cicadellidae	T-symbiont		yes		yes	Aphrodinae	sp3			phloem	phloem	intra	Prokaryota		yes	no	no			Novotny and Wilson 1997 Raven 1983	Novotny and Wilson 1997 Raven 1983	Müller 1962	Müller 1962
Hemiptera_Cicadellidae	Hemiptera	Cicadellidae	T-symbiont		yes		yes	Aphrodinae	sp4			phloem	phloem	intra	Prokaryota		yes	no	no			Novotny and Wilson 1997 Raven 1983	Novotny and Wilson 1997 Raven 1983	Müller 1962	Müller 1962
Hemiptera_Cicadellidae	Hemiptera	Cicadellidae	T-symbiont		yes		yes	Scaphygopiini	sp4			phloem	phloem	intra	Prokaryota		yes	no	no			Novotny and Wilson 1997 Raven 1983	Novotny and Wilson 1997 Raven 1983	Müller 1962	Müller 1962
Hemiptera_Cicadellidae	Hemiptera	Cicadellidae	T-symbiont		yes		yes	Euscelini	sp5			phloem	phloem	intra	Prokaryota		yes	no	no			Novotny and Wilson 1997 Raven 1983	Novotny and Wilson 1997 Raven 1983	Müller 1962	Müller 1962
Hemiptera_Cicadellidae	Hemiptera	Cicadellidae	T-symbiont		yes		yes	Evacanthinae	sp5			phloem	phloem	intra	Prokaryota		yes	no	no			Novotny and Wilson 1997 Raven 1983	Novotny and Wilson 1997 Raven 1983	Müller 1962	Müller 1962
Hemiptera_Cicadellidae	Hemiptera	Cicadellidae	T-symbiont		yes		yes	Idiocerinae	sp5			phloem	phloem	intra	Prokaryota		yes	no	no			Novotny and Wilson 1997 Raven 1983	Novotny and Wilson 1997 Raven 1983	Müller 1962	Müller 1962
Hemiptera_Cicadellidae	Hemiptera	Cicadellidae	T-symbiont		yes		yes	Euscelini	sp6			phloem	phloem	intra	Prokaryota		yes	no	no			Novotny and Wilson 1997 Raven 1983	Novotny and Wilson 1997 Raven 1983	Müller 1962	Müller 1962
Hemiptera_Cicadellidae	Hemiptera	Cicadellidae	T-symbiont		yes		yes	Idiocerinae	sp6			phloem	phloem	intra	Prokaryota		yes	no	no			Novotny and Wilson 1997 Raven 1983	Novotny and Wilson 1997 Raven 1983	Müller 1962	Müller 1962
Hemiptera_Cicadellidae	Hemiptera	Cicadellidae	T-symbiont		yes		yes	Euscelini	sp7			phloem	phloem	intra	Prokaryota		yes	no	no			Novotny and Wilson 1997 Raven 1983	Novotny and Wilson 1997 Raven 1983	Müller 1962	Müller 1962
Hemiptera_Cicadellidae	Hemiptera	Cicadellidae	T-symbiont		yes		yes	Idiocerinae	sp7			phloem	phloem	intra	Prokaryota		yes	no	no			Novotny and Wilson 1997 Raven 1983	Novotny and Wilson 1997 Raven 1983	Müller 1962	Müller 1962
Hemiptera_Cicadellidae	Hemiptera	Cicadellidae	T-symbiont		yes		yes	Euscelini	sp8			phloem	phloem	intra	Prokaryota		yes	no	no			Novotny and Wilson 1997 Raven 1983	Novotny and Wilson 1997 Raven 1983	Müller 1962	Müller 1962
Hemiptera_Cicadellidae	Hemiptera	Cicadellidae	T-symbiont		yes		yes	Idiocerinae	sp8			phloem	phloem	intra	Prokaryota		yes	no	no			Novotny and Wilson 1997 Raven 1983	Novotny and Wilson 1997 Raven 1983	Müller 1962	Müller 1962
Hemiptera_Cicadellidae	Hemiptera	Cicadellidae	T-symbiont		yes		yes	Agalliinae	sp9			phloem	phloem	intra	Prokaryota		yes	no	no			Novotny and Wilson 1997 Raven 1983	Novotny and Wilson 1997 Raven 1983	Müller 1962	Müller 1962
Hemiptera_Cicadellidae	Hemiptera	Cicadellidae	T-symbiont		yes		yes	Euscelini	sp9			phloem	phloem	intra	Prokaryota		yes	no	no			Novotny and Wilson 1997 Raven 1983	Novotny and Wilson 1997 Raven 1983	Müller 1962	Müller 1962
Hemiptera_Cicadidae	Hemiptera	Cicadidae	Candidatus Hodgkinia cicadicola	Candidatus_Hodgkinia_cicadicola_of_Diceroprocta_semicincta	yes		yes	Diceroprocta	semicincta			xylem	xylem	intra	Prokaryota		yes	yes	no			Novotny and Wilson 1997 Raven 1983	Novotny and Wilson 1997 Raven 1983	McCutcheon et al 2009	McCutcheon et al 2009
Hemiptera_Cicadidae	Hemiptera	Cicadidae	Candidatus Sulcia muelleri	Candidatus_Sulcia_muelleri_of_Cicadidae_Diceroprocta_semicincta	yes	cosegragation	yes	Diceroprocta	semicincta			xylem	xylem	intra	Prokaryota		yes	yes	no			Novotny and Wilson 1997 Raven 1983	Novotny and Wilson 1997 Raven 1983	McCutcheon et al 2009	McCutcheon et al 2009
Hemiptera_Cimicidae	Hemiptera	Cimicidae	Wolbachia	Wolbachia_of_Cimex_lectularius	yes		yes	Cimex	lectularius			blood	blood	intra	Prokaryota		yes	yes	yes			Capinera 2008 Denno and Perfect 1994	Denno and Perfect 1994 Dem et al 2013	Hosokawa et al 2010	Hosokawa et al 2010
Hemiptera_Cixiidae	Hemiptera	Cixiidae	B-symbiont		yes		yes	gen	sp11			roots	phloem	intra	Prokaryota		yes	no	no			Capinera 2008 Denno and Perfect 1994 O’Brien and Wilson 1985	Denno and Perfect 1994 Novotny and Wilson 1997 O’Brien and Wilson 1985	Müller 1962	Müller 1962
Hemiptera_Cixiidae	Hemiptera	Cixiidae	B-symbiont		yes		yes	gen	sp12			roots	phloem	intra	Prokaryota		yes	no	no			Capinera 2008 Denno and Perfect 1994 O’Brien and Wilson 1985	Denno and Perfect 1994 Novotny and Wilson 1997 O’Brien and Wilson 1985	Müller 1962	Müller 1962
Hemiptera_Cixiidae	Hemiptera	Cixiidae	B-symbiont		yes		yes	gen	sp13			roots	phloem	intra	Prokaryota		yes	no	no			Capinera 2008 Denno and Perfect 1994 O’Brien and Wilson 1985	Denno and Perfect 1994 Novotny and Wilson 1997 O’Brien and Wilson 1985	Müller 1962	Müller 1962
Hemiptera_Cixiidae	Hemiptera	Cixiidae	B-symbiont		yes		yes	gen	sp14			roots	phloem	intra	Prokaryota		yes	no	no			Capinera 2008 Denno and Perfect 1994 O’Brien and Wilson 1985	Denno and Perfect 1994 Novotny and Wilson 1997 O’Brien and Wilson 1985	Müller 1962	Müller 1962
Hemiptera_Cixiidae	Hemiptera	Cixiidae	B-symbiont		yes		yes	gen	sp15			roots	phloem	intra	Prokaryota		yes	no	no			Capinera 2008 Denno and Perfect 1994 O’Brien and Wilson 1985	Denno and Perfect 1994 Novotny and Wilson 1997 O’Brien and Wilson 1985	Müller 1962	Müller 1962
Hemiptera_Cixiidae	Hemiptera	Cixiidae	B-symbiont		yes		yes	gen	sp16			roots	phloem	intra	Prokaryota		yes	no	no			Capinera 2008 Denno and Perfect 1994 O’Brien and Wilson 1985	Denno and Perfect 1994 Novotny and Wilson 1997 O’Brien and Wilson 1985	Müller 1962	Müller 1962
Hemiptera_Cixiidae	Hemiptera	Cixiidae	B-symbiont		yes		yes	gen	sp17			roots	phloem	intra	Prokaryota		yes	no	no			Capinera 2008 Denno and Perfect 1994 O’Brien and Wilson 1985	Denno and Perfect 1994 Novotny and Wilson 1997 O’Brien and Wilson 1985	Müller 1962	Müller 1962
Hemiptera_Cixiidae	Hemiptera	Cixiidae	B-symbiont		yes		yes	gen	sp18			roots	phloem	intra	Prokaryota		yes	no	no			Capinera 2008 Denno and Perfect 1994 O’Brien and Wilson 1985	Denno and Perfect 1994 Novotny and Wilson 1997 O’Brien and Wilson 1985	Müller 1962	Müller 1962
Hemiptera_Cixiidae	Hemiptera	Cixiidae	B-symbiont		yes		yes	gen	sp19			roots	phloem	intra	Prokaryota		yes	no	no			Capinera 2008 Denno and Perfect 1994 O’Brien and Wilson 1985	Denno and Perfect 1994 Novotny and Wilson 1997 O’Brien and Wilson 1985	Müller 1962	Müller 1962
Hemiptera_Cixiidae	Hemiptera	Cixiidae	B-symbiont		yes		yes	gen	sp20			roots	phloem	intra	Prokaryota		yes	no	no			Capinera 2008 Denno and Perfect 1994 O’Brien and Wilson 1985	Denno and Perfect 1994 Novotny and Wilson 1997 O’Brien and Wilson 1985	Müller 1962	Müller 1962
Hemiptera_Cixiidae	Hemiptera	Cixiidae	B-symbiont		yes		yes	gen	sp21			roots	phloem	intra	Prokaryota		yes	no	no			Capinera 2008 Denno and Perfect 1994 O’Brien and Wilson 1985	Denno and Perfect 1994 Novotny and Wilson 1997 O’Brien and Wilson 1985	Müller 1962	Müller 1962
Hemiptera_Cixiidae	Hemiptera	Cixiidae	B-symbiont		yes		yes	gen	sp22			roots	phloem	intra	Prokaryota		yes	no	no			Capinera 2008 Denno and Perfect 1994 O’Brien and Wilson 1985	Denno and Perfect 1994 Novotny and Wilson 1997 O’Brien and Wilson 1985	Müller 1962	Müller 1962
Hemiptera_Cixiidae	Hemiptera	Cixiidae	B-symbiont		yes		yes	gen	sp23			roots	phloem	intra	Prokaryota		yes	no	no			Capinera 2008 Denno and Perfect 1994 O’Brien and Wilson 1985	Denno and Perfect 1994 Novotny and Wilson 1997 O’Brien and Wilson 1985	Müller 1962	Müller 1962
Hemiptera_Cixiidae	Hemiptera	Cixiidae	B-symbiont		yes		yes	gen	sp24			roots	phloem	intra	Prokaryota		yes	no	no			Capinera 2008 Denno and Perfect 1994 O’Brien and Wilson 1985	Denno and Perfect 1994 Novotny and Wilson 1997 O’Brien and Wilson 1985	Müller 1962	Müller 1962
Hemiptera_Cixiidae	Hemiptera	Cixiidae	B-symbiont		yes		yes	gen	sp25			roots	phloem	intra	Prokaryota		yes	no	no			Capinera 2008 Denno and Perfect 1994 O’Brien and Wilson 1985	Denno and Perfect 1994 Novotny and Wilson 1997 O’Brien and Wilson 1985	Müller 1962	Müller 1962
Hemiptera_Cixiidae	Hemiptera	Cixiidae	B-symbiont		yes		yes	gen	sp26			roots	phloem	intra	Prokaryota		yes	no	no			Capinera 2008 Denno and Perfect 1994 O’Brien and Wilson 1985	Denno and Perfect 1994 Novotny and Wilson 1997 O’Brien and Wilson 1985	Müller 1962	Müller 1962
Hemiptera_Cixiidae	Hemiptera	Cixiidae	B-symbiont		yes		yes	gen	sp9			roots	phloem	intra	Prokaryota		yes	no	no			Capinera 2008 Denno and Perfect 1994 O’Brien and Wilson 1985	Denno and Perfect 1994 Novotny and Wilson 1997 O’Brien and Wilson 1985	Müller 1962	Müller 1962
Hemiptera_Cixiidae	Hemiptera	Cixiidae	B-symbiont		yes		yes	gen	sp10			roots	phloem	intra	Prokaryota		yes	no	no			Capinera 2008 Denno and Perfect 1994 O’Brien and Wilson 1985	Denno and Perfect 1994 Novotny and Wilson 1997 O’Brien and Wilson 1985	Müller 1962	Müller 1962
Hemiptera_Cixiidae	Hemiptera	Cixiidae	C-symbiont		yes		yes	gen	sp10			roots	phloem	intra	Prokaryota		yes	no	no			Capinera 2008 Denno and Perfect 1994 O’Brien and Wilson 1985	Denno and Perfect 1994 Novotny and Wilson 1997 O’Brien and Wilson 1985	Müller 1962	Müller 1962
Hemiptera_Cixiidae	Hemiptera	Cixiidae	C-symbiont		yes		yes	gen	sp11			roots	phloem	intra	Prokaryota		yes	no	no			Capinera 2008 Denno and Perfect 1994 O’Brien and Wilson 1985	Denno and Perfect 1994 Novotny and Wilson 1997 O’Brien and Wilson 1985	Müller 1962	Müller 1962
Hemiptera_Cixiidae	Hemiptera	Cixiidae	C-symbiont		yes		yes	gen	sp12			roots	phloem	intra	Prokaryota		yes	no	no			Capinera 2008 Denno and Perfect 1994 O’Brien and Wilson 1985	Denno and Perfect 1994 Novotny and Wilson 1997 O’Brien and Wilson 1985	Müller 1962	Müller 1962
Hemiptera_Cixiidae	Hemiptera	Cixiidae	C-symbiont		yes		yes	gen	sp13			roots	phloem	intra	Prokaryota		yes	no	no			Capinera 2008 Denno and Perfect 1994 O’Brien and Wilson 1985	Denno and Perfect 1994 Novotny and Wilson 1997 O’Brien and Wilson 1985	Müller 1962	Müller 1962
Hemiptera_Cixiidae	Hemiptera	Cixiidae	C-symbiont		yes		yes	gen	sp14			roots	phloem	intra	Prokaryota		yes	no	no			Capinera 2008 Denno and Perfect 1994 O’Brien and Wilson 1985	Denno and Perfect 1994 Novotny and Wilson 1997 O’Brien and Wilson 1985	Müller 1962	Müller 1962
Hemiptera_Cixiidae	Hemiptera	Cixiidae	C-symbiont		yes		yes	gen	sp15			roots	phloem	intra	Prokaryota		yes	no	no			Capinera 2008 Denno and Perfect 1994 O’Brien and Wilson 1985	Denno and Perfect 1994 Novotny and Wilson 1997 O’Brien and Wilson 1985	Müller 1962	Müller 1962
Hemiptera_Cixiidae	Hemiptera	Cixiidae	C-symbiont		yes		yes	gen	sp16			roots	phloem	intra	Prokaryota		yes	no	no			Capinera 2008 Denno and Perfect 1994 O’Brien and Wilson 1985	Denno and Perfect 1994 Novotny and Wilson 1997 O’Brien and Wilson 1985	Müller 1962	Müller 1962
Hemiptera_Cixiidae	Hemiptera	Cixiidae	C-symbiont		yes		yes	gen	sp17			roots	phloem	intra	Prokaryota		yes	no	no			Capinera 2008 Denno and Perfect 1994 O’Brien and Wilson 1985	Denno and Perfect 1994 Novotny and Wilson 1997 O’Brien and Wilson 1985	Müller 1962	Müller 1962
Hemiptera_Cixiidae	Hemiptera	Cixiidae	C-symbiont		yes		yes	gen	sp18			roots	phloem	intra	Prokaryota		yes	no	no			Capinera 2008 Denno and Perfect 1994 O’Brien and Wilson 1985	Denno and Perfect 1994 Novotny and Wilson 1997 O’Brien and Wilson 1985	Müller 1962	Müller 1962
Hemiptera_Cixiidae	Hemiptera	Cixiidae	C-symbiont		yes		yes	gen	sp19			roots	phloem	intra	Prokaryota		yes	no	no			Capinera 2008 Denno and Perfect 1994 O’Brien and Wilson 1985	Denno and Perfect 1994 Novotny and Wilson 1997 O’Brien and Wilson 1985	Müller 1962	Müller 1962
Hemiptera_Cixiidae	Hemiptera	Cixiidae	C-symbiont		yes		yes	gen	sp20			roots	phloem	intra	Prokaryota		yes	no	no			Capinera 2008 Denno and Perfect 1994 O’Brien and Wilson 1985	Denno and Perfect 1994 Novotny and Wilson 1997 O’Brien and Wilson 1985	Müller 1962	Müller 1962
Hemiptera_Cixiidae	Hemiptera	Cixiidae	C-symbiont		yes		yes	gen	sp21			roots	phloem	intra	Prokaryota		yes	no	no			Capinera 2008 Denno and Perfect 1994 O’Brien and Wilson 1985	Denno and Perfect 1994 Novotny and Wilson 1997 O’Brien and Wilson 1985	Müller 1962	Müller 1962
Hemiptera_Cixiidae	Hemiptera	Cixiidae	C-symbiont		yes		yes	gen	sp22			roots	phloem	intra	Prokaryota		yes	no	no			Capinera 2008 Denno and Perfect 1994 O’Brien and Wilson 1985	Denno and Perfect 1994 Novotny and Wilson 1997 O’Brien and Wilson 1985	Müller 1962	Müller 1962
Hemiptera_Cixiidae	Hemiptera	Cixiidae	C-symbiont		yes		yes	gen	sp23			roots	phloem	intra	Prokaryota		yes	no	no			Capinera 2008 Denno and Perfect 1994 O’Brien and Wilson 1985	Denno and Perfect 1994 Novotny and Wilson 1997 O’Brien and Wilson 1985	Müller 1962	Müller 1962
Hemiptera_Cixiidae	Hemiptera	Cixiidae	C-symbiont		yes		yes	gen	sp24			roots	phloem	intra	Prokaryota		yes	no	no			Capinera 2008 Denno and Perfect 1994 O’Brien and Wilson 1985	Denno and Perfect 1994 Novotny and Wilson 1997 O’Brien and Wilson 1985	Müller 1962	Müller 1962
Hemiptera_Cixiidae	Hemiptera	Cixiidae	C-symbiont		yes		yes	gen	sp25			roots	phloem	intra	Prokaryota		yes	no	no			Capinera 2008 Denno and Perfect 1994 O’Brien and Wilson 1985	Denno and Perfect 1994 Novotny and Wilson 1997 O’Brien and Wilson 1985	Müller 1962	Müller 1962
Hemiptera_Cixiidae	Hemiptera	Cixiidae	C-symbiont		yes		yes	gen	sp26			roots	phloem	intra	Prokaryota		yes	no	no			Capinera 2008 Denno and Perfect 1994 O’Brien and Wilson 1985	Denno and Perfect 1994 Novotny and Wilson 1997 O’Brien and Wilson 1985	Müller 1962	Müller 1962
Hemiptera_Cixiidae	Hemiptera	Cixiidae	C-symbiont		yes		yes	gen	sp9			roots	phloem	intra	Prokaryota		yes	no	no			Capinera 2008 Denno and Perfect 1994 O’Brien and Wilson 1985	Denno and Perfect 1994 Novotny and Wilson 1997 O’Brien and Wilson 1985	Müller 1962	Müller 1962
Hemiptera_Cixiidae	Hemiptera	Cixiidae	Candidatus Purcelliella pentastirinorum	Candidatus_Purcelliella_pentastirinorum	yes	cosegragation	yes	Oliarus	filicicola			roots	phloem	intra	Prokaryota		yes	yes	no			Capinera 2008 Denno and Perfect 1994 O’Brien and Wilson 1985	Denno and Perfect 1994 Novotny and Wilson 1997 O’Brien and Wilson 1985	Bressan et al 2009	Bressan et al 2009
Hemiptera_Cixiidae	Hemiptera	Cixiidae	Candidatus Purcelliella pentastirinorum	Candidatus_Purcelliella_pentastirinorum	yes	cosegragation	yes	Pentastiridius	leporinus			roots	phloem	intra	Prokaryota		yes	yes	no			Capinera 2008 Denno and Perfect 1994 O’Brien and Wilson 1985	Denno and Perfect 1994 Novotny and Wilson 1997 O’Brien and Wilson 1985	Bressan et al 2009	Bressan et al 2009
Hemiptera_Cixiidae	Hemiptera	Cixiidae	Candidatus Purcelliella pentastirinorum	Candidatus_Purcelliella_pentastirinorum	yes	cosegragation	yes	Reptalus	cuspidatus			roots	phloem	intra	Prokaryota		yes	yes	no			Capinera 2008 Denno and Perfect 1994 O’Brien and Wilson 1985	Denno and Perfect 1994 Novotny and Wilson 1997 O’Brien and Wilson 1985	Bressan et al 2009
Hemiptera_Cixiidae	Hemiptera	Cixiidae	Candidatus Purcelliella pentastirinorum	Candidatus_Purcelliella_pentastirinorum	yes	cosegragation	yes	Oliarus	intermedius			roots	phloem	intra	Prokaryota		yes	yes	no			Capinera 2008 Denno and Perfect 1994 O’Brien and Wilson 1985	Denno and Perfect 1994 Novotny and Wilson 1997 O’Brien and Wilson 1985	Bressan et al 2009
Hemiptera_Cixiidae	Hemiptera	Cixiidae	Candidatus Purcelliella pentastirinorum	Candidatus_Purcelliella_pentastirinorum	yes	cosegragation	yes	Hyalesthes	obsoletus			roots	phloem	intra	Prokaryota		yes	yes	no			Capinera 2008 Denno and Perfect 1994 O’Brien and Wilson 1985	Denno and Perfect 1994 Novotny and Wilson 1997 O’Brien and Wilson 1985	Bressan et al 2009
Hemiptera_Cixiidae	Hemiptera	Cixiidae	Candidatus Purcelliella pentastirinorum	Candidatus_Purcelliella_pentastirinorum	yes	cosegragation	yes	Hyalesthes	scotti			roots	phloem	intra	Prokaryota		yes	yes	no			Capinera 2008 Denno and Perfect 1994 O’Brien and Wilson 1985	Denno and Perfect 1994 Novotny and Wilson 1997 O’Brien and Wilson 1985	Bressan et al 2009
Hemiptera_Cixiidae	Hemiptera	Cixiidae	Candidatus Purcelliella pentastirinorum	Candidatus_Purcelliella_pentastirinorum	yes	cosegragation	yes	Oliarus	tamehameha			roots	phloem	intra	Prokaryota		yes	yes	no			Capinera 2008 Denno and Perfect 1994 O’Brien and Wilson 1985	Denno and Perfect 1994 Novotny and Wilson 1997 O’Brien and Wilson 1985	Bressan et al 2009
Hemiptera_Cixiidae	Hemiptera	Cixiidae	Candidatus Sulcia muelleri	Candidatus_Sulcia_muelleri_of_Cixiidae	yes	cosegragation	yes	Oliarus	filicicola			roots	phloem	intra	Prokaryota		yes	no	no			Capinera 2008 Denno and Perfect 1994 O’Brien and Wilson 1985	Denno and Perfect 1994 Novotny and Wilson 1997 O’Brien and Wilson 1985	Bressan et al 2009	Bressan et al 2009
Hemiptera_Cixiidae	Hemiptera	Cixiidae	Candidatus Sulcia muelleri	Candidatus_Sulcia_muelleri_of_Cixiidae	yes	cosegragation	yes	Pentastiridius	leporinus			roots	phloem	intra	Prokaryota		yes	no	no			Capinera 2008 Denno and Perfect 1994 O’Brien and Wilson 1985	Denno and Perfect 1994 Novotny and Wilson 1997 O’Brien and Wilson 1985	Bressan et al 2009	Bressan et al 2009
Hemiptera_Cixiidae	Hemiptera	Cixiidae	Candidatus Sulcia muelleri	Candidatus_Sulcia_muelleri_of_Cixiidae	yes	cosegragation	yes	Reptalus	cuspidatus			roots	phloem	intra	Prokaryota		yes	no	no			Capinera 2008 Denno and Perfect 1994 O’Brien and Wilson 1985	Denno and Perfect 1994 Novotny and Wilson 1997 O’Brien and Wilson 1985	Bressan et al 2009
Hemiptera_Cixiidae	Hemiptera	Cixiidae	Candidatus Sulcia muelleri	Candidatus_Sulcia_muelleri_of_Cixiidae	yes	cosegragation	yes	Oliarus	intermedius			roots	phloem	intra	Prokaryota		yes	no	no			Capinera 2008 Denno and Perfect 1994 O’Brien and Wilson 1985	Denno and Perfect 1994 Novotny and Wilson 1997 O’Brien and Wilson 1985	Bressan et al 2009
Hemiptera_Cixiidae	Hemiptera	Cixiidae	Candidatus Sulcia muelleri	Candidatus_Sulcia_muelleri_of_Cixiidae	yes	cosegragation	yes	Hyalesthes	scotti			roots	phloem	intra	Prokaryota		yes	no	no			Capinera 2008 Denno and Perfect 1994 O’Brien and Wilson 1985	Denno and Perfect 1994 Novotny and Wilson 1997 O’Brien and Wilson 1985	Bressan et al 2009
Hemiptera_Cixiidae	Hemiptera	Cixiidae	Candidatus Sulcia muelleri	Candidatus_Sulcia_muelleri_of_Cixiidae	yes	cosegragation	yes	Oliarus	tamehameha			roots	phloem	intra	Prokaryota		yes	no	no			Capinera 2008 Denno and Perfect 1994 O’Brien and Wilson 1985	Denno and Perfect 1994 Novotny and Wilson 1997 O’Brien and Wilson 1985	Bressan et al 2009
Hemiptera_Cixiidae	Hemiptera	Cixiidae	Candidatus Sulcia muelleri	Candidatus_Sulcia_muelleri_of_Cixiidae	yes	cosegragation	yes	gen	sp1			roots	phloem	intra	Prokaryota		yes	no	no			Capinera 2008 Denno and Perfect 1994 O’Brien and Wilson 1985	Denno and Perfect 1994 Novotny and Wilson 1997 O’Brien and Wilson 1985	Müller 1962	Müller 1962
Hemiptera_Cixiidae	Hemiptera	Cixiidae	Candidatus Sulcia muelleri	Candidatus_Sulcia_muelleri_of_Cixiidae	yes	cosegragation	yes	gen	sp10			roots	phloem	intra	Prokaryota		yes	no	no			Capinera 2008 Denno and Perfect 1994 O’Brien and Wilson 1985	Denno and Perfect 1994 Novotny and Wilson 1997 O’Brien and Wilson 1985	Müller 1962	Müller 1962
Hemiptera_Cixiidae	Hemiptera	Cixiidae	Candidatus Sulcia muelleri	Candidatus_Sulcia_muelleri_of_Cixiidae	yes	cosegragation	yes	gen	sp11			roots	phloem	intra	Prokaryota		yes	no	no			Capinera 2008 Denno and Perfect 1994 O’Brien and Wilson 1985	Denno and Perfect 1994 Novotny and Wilson 1997 O’Brien and Wilson 1985	Müller 1962	Müller 1962
Hemiptera_Cixiidae	Hemiptera	Cixiidae	Candidatus Sulcia muelleri	Candidatus_Sulcia_muelleri_of_Cixiidae	yes	cosegragation	yes	gen	sp12			roots	phloem	intra	Prokaryota		yes	no	no			Capinera 2008 Denno and Perfect 1994 O’Brien and Wilson 1985	Denno and Perfect 1994 Novotny and Wilson 1997 O’Brien and Wilson 1985	Müller 1962	Müller 1962
Hemiptera_Cixiidae	Hemiptera	Cixiidae	Candidatus Sulcia muelleri	Candidatus_Sulcia_muelleri_of_Cixiidae	yes	cosegragation	yes	gen	sp13			roots	phloem	intra	Prokaryota		yes	no	no			Capinera 2008 Denno and Perfect 1994 O’Brien and Wilson 1985	Denno and Perfect 1994 Novotny and Wilson 1997 O’Brien and Wilson 1985	Müller 1962	Müller 1962
Hemiptera_Cixiidae	Hemiptera	Cixiidae	Candidatus Sulcia muelleri	Candidatus_Sulcia_muelleri_of_Cixiidae	yes	cosegragation	yes	gen	sp14			roots	phloem	intra	Prokaryota		yes	no	no			Capinera 2008 Denno and Perfect 1994 O’Brien and Wilson 1985	Denno and Perfect 1994 Novotny and Wilson 1997 O’Brien and Wilson 1985	Müller 1962	Müller 1962
Hemiptera_Cixiidae	Hemiptera	Cixiidae	Candidatus Sulcia muelleri	Candidatus_Sulcia_muelleri_of_Cixiidae	yes	cosegragation	yes	gen	sp15			roots	phloem	intra	Prokaryota		yes	no	no			Capinera 2008 Denno and Perfect 1994 O’Brien and Wilson 1985	Denno and Perfect 1994 Novotny and Wilson 1997 O’Brien and Wilson 1985	Müller 1962	Müller 1962
Hemiptera_Cixiidae	Hemiptera	Cixiidae	Candidatus Sulcia muelleri	Candidatus_Sulcia_muelleri_of_Cixiidae	yes	cosegragation	yes	gen	sp16			roots	phloem	intra	Prokaryota		yes	no	no			Capinera 2008 Denno and Perfect 1994 O’Brien and Wilson 1985	Denno and Perfect 1994 Novotny and Wilson 1997 O’Brien and Wilson 1985	Müller 1962	Müller 1962
Hemiptera_Cixiidae	Hemiptera	Cixiidae	Candidatus Sulcia muelleri	Candidatus_Sulcia_muelleri_of_Cixiidae	yes	cosegragation	yes	gen	sp17			roots	phloem	intra	Prokaryota		yes	no	no			Capinera 2008 Denno and Perfect 1994 O’Brien and Wilson 1985	Denno and Perfect 1994 Novotny and Wilson 1997 O’Brien and Wilson 1985	Müller 1962	Müller 1962
Hemiptera_Cixiidae	Hemiptera	Cixiidae	Candidatus Sulcia muelleri	Candidatus_Sulcia_muelleri_of_Cixiidae	yes	cosegragation	yes	gen	sp18			roots	phloem	intra	Prokaryota		yes	no	no			Capinera 2008 Denno and Perfect 1994 O’Brien and Wilson 1985	Denno and Perfect 1994 Novotny and Wilson 1997 O’Brien and Wilson 1985	Müller 1962	Müller 1962
Hemiptera_Cixiidae	Hemiptera	Cixiidae	Candidatus Sulcia muelleri	Candidatus_Sulcia_muelleri_of_Cixiidae	yes	cosegragation	yes	gen	sp19			roots	phloem	intra	Prokaryota		yes	no	no			Capinera 2008 Denno and Perfect 1994 O’Brien and Wilson 1985	Denno and Perfect 1994 Novotny and Wilson 1997 O’Brien and Wilson 1985	Müller 1962	Müller 1962
Hemiptera_Cixiidae	Hemiptera	Cixiidae	Candidatus Sulcia muelleri	Candidatus_Sulcia_muelleri_of_Cixiidae	yes	cosegragation	yes	gen	sp2			roots	phloem	intra	Prokaryota		yes	no	no			Capinera 2008 Denno and Perfect 1994 O’Brien and Wilson 1985	Denno and Perfect 1994 Novotny and Wilson 1997 O’Brien and Wilson 1985	Müller 1962	Müller 1962
Hemiptera_Cixiidae	Hemiptera	Cixiidae	Candidatus Sulcia muelleri	Candidatus_Sulcia_muelleri_of_Cixiidae	yes	cosegragation	yes	gen	sp20			roots	phloem	intra	Prokaryota		yes	no	no			Capinera 2008 Denno and Perfect 1994 O’Brien and Wilson 1985	Denno and Perfect 1994 Novotny and Wilson 1997 O’Brien and Wilson 1985	Müller 1962	Müller 1962
Hemiptera_Cixiidae	Hemiptera	Cixiidae	Candidatus Sulcia muelleri	Candidatus_Sulcia_muelleri_of_Cixiidae	yes	cosegragation	yes	gen	sp21			roots	phloem	intra	Prokaryota		yes	no	no			Capinera 2008 Denno and Perfect 1994 O’Brien and Wilson 1985	Denno and Perfect 1994 Novotny and Wilson 1997 O’Brien and Wilson 1985	Müller 1962	Müller 1962
Hemiptera_Cixiidae	Hemiptera	Cixiidae	Candidatus Sulcia muelleri	Candidatus_Sulcia_muelleri_of_Cixiidae	yes	cosegragation	yes	gen	sp22			roots	phloem	intra	Prokaryota		yes	no	no			Capinera 2008 Denno and Perfect 1994 O’Brien and Wilson 1985	Denno and Perfect 1994 Novotny and Wilson 1997 O’Brien and Wilson 1985	Müller 1962	Müller 1962
Hemiptera_Cixiidae	Hemiptera	Cixiidae	Candidatus Sulcia muelleri	Candidatus_Sulcia_muelleri_of_Cixiidae	yes	cosegragation	yes	gen	sp23			roots	phloem	intra	Prokaryota		yes	no	no			Capinera 2008 Denno and Perfect 1994 O’Brien and Wilson 1985	Denno and Perfect 1994 Novotny and Wilson 1997 O’Brien and Wilson 1985	Müller 1962	Müller 1962
Hemiptera_Cixiidae	Hemiptera	Cixiidae	Candidatus Sulcia muelleri	Candidatus_Sulcia_muelleri_of_Cixiidae	yes	cosegragation	yes	gen	sp24			roots	phloem	intra	Prokaryota		yes	no	no			Capinera 2008 Denno and Perfect 1994 O’Brien and Wilson 1985	Denno and Perfect 1994 Novotny and Wilson 1997 O’Brien and Wilson 1985	Müller 1962	Müller 1962
Hemiptera_Cixiidae	Hemiptera	Cixiidae	Candidatus Sulcia muelleri	Candidatus_Sulcia_muelleri_of_Cixiidae	yes	cosegragation	yes	gen	sp3			roots	phloem	intra	Prokaryota		yes	no	no			Capinera 2008 Denno and Perfect 1994 O’Brien and Wilson 1985	Denno and Perfect 1994 Novotny and Wilson 1997 O’Brien and Wilson 1985	Müller 1962	Müller 1962
Hemiptera_Cixiidae	Hemiptera	Cixiidae	Candidatus Sulcia muelleri	Candidatus_Sulcia_muelleri_of_Cixiidae	yes	cosegragation	yes	gen	sp4			roots	phloem	intra	Prokaryota		yes	no	no			Capinera 2008 Denno and Perfect 1994 O’Brien and Wilson 1985	Denno and Perfect 1994 Novotny and Wilson 1997 O’Brien and Wilson 1985	Müller 1962	Müller 1962
Hemiptera_Cixiidae	Hemiptera	Cixiidae	Candidatus Sulcia muelleri	Candidatus_Sulcia_muelleri_of_Cixiidae	yes	cosegragation	yes	gen	sp5			roots	phloem	intra	Prokaryota		yes	no	no			Capinera 2008 Denno and Perfect 1994 O’Brien and Wilson 1985	Denno and Perfect 1994 Novotny and Wilson 1997 O’Brien and Wilson 1985	Müller 1962	Müller 1962
Hemiptera_Cixiidae	Hemiptera	Cixiidae	Candidatus Sulcia muelleri	Candidatus_Sulcia_muelleri_of_Cixiidae	yes	cosegragation	yes	gen	sp6			roots	phloem	intra	Prokaryota		yes	no	no			Capinera 2008 Denno and Perfect 1994 O’Brien and Wilson 1985	Denno and Perfect 1994 Novotny and Wilson 1997 O’Brien and Wilson 1985	Müller 1962	Müller 1962
Hemiptera_Cixiidae	Hemiptera	Cixiidae	Candidatus Sulcia muelleri	Candidatus_Sulcia_muelleri_of_Cixiidae	yes	cosegragation	yes	gen	sp7			roots	phloem	intra	Prokaryota		yes	no	no			Capinera 2008 Denno and Perfect 1994 O’Brien and Wilson 1985	Denno and Perfect 1994 Novotny and Wilson 1997 O’Brien and Wilson 1985	Müller 1962	Müller 1962
Hemiptera_Cixiidae	Hemiptera	Cixiidae	Candidatus Sulcia muelleri	Candidatus_Sulcia_muelleri_of_Cixiidae	yes	cosegragation	yes	gen	sp8			roots	phloem	intra	Prokaryota		yes	no	no			Capinera 2008 Denno and Perfect 1994 O’Brien and Wilson 1985	Denno and Perfect 1994 Novotny and Wilson 1997 O’Brien and Wilson 1985	Müller 1962	Müller 1962
Hemiptera_Cixiidae	Hemiptera	Cixiidae	Candidatus Sulcia muelleri	Candidatus_Sulcia_muelleri_of_Cixiidae	yes	cosegragation	yes	gen	sp9			roots	phloem	intra	Prokaryota		yes	no	no			Capinera 2008 Denno and Perfect 1994 O’Brien and Wilson 1985	Denno and Perfect 1994 Novotny and Wilson 1997 O’Brien and Wilson 1985	Müller 1962	Müller 1962
Hemiptera_Cixiidae	Hemiptera	Cixiidae	Candidatus Vidania fulgoroideae	Candidatus_Vidania_fulgoroideae_of_Cixiidae	yes	cosegragation	yes	gen	sp1			roots	phloem	intra	Prokaryota		yes	no	no			Capinera 2008 Denno and Perfect 1994 O’Brien and Wilson 1985	Denno and Perfect 1994 Novotny and Wilson 1997 O’Brien and Wilson 1985	Müller 1962	Müller 1962
Hemiptera_Cixiidae	Hemiptera	Cixiidae	Candidatus Vidania fulgoroideae	Candidatus_Vidania_fulgoroideae_of_Cixiidae	yes	cosegragation	yes	gen	sp10			roots	phloem	intra	Prokaryota		yes	no	no			Capinera 2008 Denno and Perfect 1994 O’Brien and Wilson 1985	Denno and Perfect 1994 Novotny and Wilson 1997 O’Brien and Wilson 1985	Müller 1962	Müller 1962
Hemiptera_Cixiidae	Hemiptera	Cixiidae	Candidatus Vidania fulgoroideae	Candidatus_Vidania_fulgoroideae_of_Cixiidae	yes	cosegragation	yes	gen	sp11			roots	phloem	intra	Prokaryota		yes	no	no			Capinera 2008 Denno and Perfect 1994 O’Brien and Wilson 1985	Denno and Perfect 1994 Novotny and Wilson 1997 O’Brien and Wilson 1985	Müller 1962	Müller 1962
Hemiptera_Cixiidae	Hemiptera	Cixiidae	Candidatus Vidania fulgoroideae	Candidatus_Vidania_fulgoroideae_of_Cixiidae	yes	cosegragation	yes	gen	sp12			roots	phloem	intra	Prokaryota		yes	no	no			Capinera 2008 Denno and Perfect 1994 O’Brien and Wilson 1985	Denno and Perfect 1994 Novotny and Wilson 1997 O’Brien and Wilson 1985	Müller 1962	Müller 1962
Hemiptera_Cixiidae	Hemiptera	Cixiidae	Candidatus Vidania fulgoroideae	Candidatus_Vidania_fulgoroideae_of_Cixiidae	yes	cosegragation	yes	gen	sp13			roots	phloem	intra	Prokaryota		yes	no	no			Capinera 2008 Denno and Perfect 1994 O’Brien and Wilson 1985	Denno and Perfect 1994 Novotny and Wilson 1997 O’Brien and Wilson 1985	Müller 1962	Müller 1962
Hemiptera_Cixiidae	Hemiptera	Cixiidae	Candidatus Vidania fulgoroideae	Candidatus_Vidania_fulgoroideae_of_Cixiidae	yes	cosegragation	yes	gen	sp14			roots	phloem	intra	Prokaryota		yes	no	no			Capinera 2008 Denno and Perfect 1994 O’Brien and Wilson 1985	Denno and Perfect 1994 Novotny and Wilson 1997 O’Brien and Wilson 1985	Müller 1962	Müller 1962
Hemiptera_Cixiidae	Hemiptera	Cixiidae	Candidatus Vidania fulgoroideae	Candidatus_Vidania_fulgoroideae_of_Cixiidae	yes	cosegragation	yes	gen	sp15			roots	phloem	intra	Prokaryota		yes	no	no			Capinera 2008 Denno and Perfect 1994 O’Brien and Wilson 1985	Denno and Perfect 1994 Novotny and Wilson 1997 O’Brien and Wilson 1985	Müller 1962	Müller 1962
Hemiptera_Cixiidae	Hemiptera	Cixiidae	Candidatus Vidania fulgoroideae	Candidatus_Vidania_fulgoroideae_of_Cixiidae	yes	cosegragation	yes	gen	sp16			roots	phloem	intra	Prokaryota		yes	no	no			Capinera 2008 Denno and Perfect 1994 O’Brien and Wilson 1985	Denno and Perfect 1994 Novotny and Wilson 1997 O’Brien and Wilson 1985	Müller 1962	Müller 1962
Hemiptera_Cixiidae	Hemiptera	Cixiidae	Candidatus Vidania fulgoroideae	Candidatus_Vidania_fulgoroideae_of_Cixiidae	yes	cosegragation	yes	gen	sp17			roots	phloem	intra	Prokaryota		yes	no	no			Capinera 2008 Denno and Perfect 1994 O’Brien and Wilson 1985	Denno and Perfect 1994 Novotny and Wilson 1997 O’Brien and Wilson 1985	Müller 1962	Müller 1962
Hemiptera_Cixiidae	Hemiptera	Cixiidae	Candidatus Vidania fulgoroideae	Candidatus_Vidania_fulgoroideae_of_Cixiidae	yes	cosegragation	yes	gen	sp18			roots	phloem	intra	Prokaryota		yes	no	no			Capinera 2008 Denno and Perfect 1994 O’Brien and Wilson 1985	Denno and Perfect 1994 Novotny and Wilson 1997 O’Brien and Wilson 1985	Müller 1962	Müller 1962
Hemiptera_Cixiidae	Hemiptera	Cixiidae	Candidatus Vidania fulgoroideae	Candidatus_Vidania_fulgoroideae_of_Cixiidae	yes	cosegragation	yes	gen	sp19			roots	phloem	intra	Prokaryota		yes	no	no			Capinera 2008 Denno and Perfect 1994 O’Brien and Wilson 1985	Denno and Perfect 1994 Novotny and Wilson 1997 O’Brien and Wilson 1985	Müller 1962	Müller 1962
Hemiptera_Cixiidae	Hemiptera	Cixiidae	Candidatus Vidania fulgoroideae	Candidatus_Vidania_fulgoroideae_of_Cixiidae	yes	cosegragation	yes	gen	sp2			roots	phloem	intra	Prokaryota		yes	no	no			Capinera 2008 Denno and Perfect 1994 O’Brien and Wilson 1985	Denno and Perfect 1994 Novotny and Wilson 1997 O’Brien and Wilson 1985	Müller 1962	Müller 1962
Hemiptera_Cixiidae	Hemiptera	Cixiidae	Candidatus Vidania fulgoroideae	Candidatus_Vidania_fulgoroideae_of_Cixiidae	yes	cosegragation	yes	gen	sp20			roots	phloem	intra	Prokaryota		yes	no	no			Capinera 2008 Denno and Perfect 1994 O’Brien and Wilson 1985	Denno and Perfect 1994 Novotny and Wilson 1997 O’Brien and Wilson 1985	Müller 1962	Müller 1962
Hemiptera_Cixiidae	Hemiptera	Cixiidae	Candidatus Vidania fulgoroideae	Candidatus_Vidania_fulgoroideae_of_Cixiidae	yes	cosegragation	yes	gen	sp21			roots	phloem	intra	Prokaryota		yes	no	no			Capinera 2008 Denno and Perfect 1994 O’Brien and Wilson 1985	Denno and Perfect 1994 Novotny and Wilson 1997 O’Brien and Wilson 1985	Müller 1962	Müller 1962
Hemiptera_Cixiidae	Hemiptera	Cixiidae	Candidatus Vidania fulgoroideae	Candidatus_Vidania_fulgoroideae_of_Cixiidae	yes	cosegragation	yes	gen	sp22			roots	phloem	intra	Prokaryota		yes	no	no			Capinera 2008 Denno and Perfect 1994 O’Brien and Wilson 1985	Denno and Perfect 1994 Novotny and Wilson 1997 O’Brien and Wilson 1985	Müller 1962	Müller 1962
Hemiptera_Cixiidae	Hemiptera	Cixiidae	Candidatus Vidania fulgoroideae	Candidatus_Vidania_fulgoroideae_of_Cixiidae	yes	cosegragation	yes	gen	sp23			roots	phloem	intra	Prokaryota		yes	no	no			Capinera 2008 Denno and Perfect 1994 O’Brien and Wilson 1985	Denno and Perfect 1994 Novotny and Wilson 1997 O’Brien and Wilson 1985	Müller 1962	Müller 1962
Hemiptera_Cixiidae	Hemiptera	Cixiidae	Candidatus Vidania fulgoroideae	Candidatus_Vidania_fulgoroideae_of_Cixiidae	yes	cosegragation	yes	gen	sp24			roots	phloem	intra	Prokaryota		yes	no	no			Capinera 2008 Denno and Perfect 1994 O’Brien and Wilson 1985	Denno and Perfect 1994 Novotny and Wilson 1997 O’Brien and Wilson 1985	Müller 1962	Müller 1962
Hemiptera_Cixiidae	Hemiptera	Cixiidae	Candidatus Vidania fulgoroideae	Candidatus_Vidania_fulgoroideae_of_Cixiidae	yes	cosegragation	yes	gen	sp3			roots	phloem	intra	Prokaryota		yes	no	no			Capinera 2008 Denno and Perfect 1994 O’Brien and Wilson 1985	Denno and Perfect 1994 Novotny and Wilson 1997 O’Brien and Wilson 1985	Müller 1962	Müller 1962
Hemiptera_Cixiidae	Hemiptera	Cixiidae	Candidatus Vidania fulgoroideae	Candidatus_Vidania_fulgoroideae_of_Cixiidae	yes	cosegragation	yes	gen	sp4			roots	phloem	intra	Prokaryota		yes	no	no			Capinera 2008 Denno and Perfect 1994 O’Brien and Wilson 1985	Denno and Perfect 1994 Novotny and Wilson 1997 O’Brien and Wilson 1985	Müller 1962	Müller 1962
Hemiptera_Cixiidae	Hemiptera	Cixiidae	Candidatus Vidania fulgoroideae	Candidatus_Vidania_fulgoroideae_of_Cixiidae	yes	cosegragation	yes	gen	sp5			roots	phloem	intra	Prokaryota		yes	no	no			Capinera 2008 Denno and Perfect 1994 O’Brien and Wilson 1985	Denno and Perfect 1994 Novotny and Wilson 1997 O’Brien and Wilson 1985	Müller 1962	Müller 1962
Hemiptera_Cixiidae	Hemiptera	Cixiidae	Candidatus Vidania fulgoroideae	Candidatus_Vidania_fulgoroideae_of_Cixiidae	yes	cosegragation	yes	gen	sp6			roots	phloem	intra	Prokaryota		yes	no	no			Capinera 2008 Denno and Perfect 1994 O’Brien and Wilson 1985	Denno and Perfect 1994 Novotny and Wilson 1997 O’Brien and Wilson 1985	Müller 1962	Müller 1962
Hemiptera_Cixiidae	Hemiptera	Cixiidae	Candidatus Vidania fulgoroideae	Candidatus_Vidania_fulgoroideae_of_Cixiidae	yes	cosegragation	yes	gen	sp7			roots	phloem	intra	Prokaryota		yes	no	no			Capinera 2008 Denno and Perfect 1994 O’Brien and Wilson 1985	Denno and Perfect 1994 Novotny and Wilson 1997 O’Brien and Wilson 1985	Müller 1962	Müller 1962
Hemiptera_Cixiidae	Hemiptera	Cixiidae	Candidatus Vidania fulgoroideae	Candidatus_Vidania_fulgoroideae_of_Cixiidae	yes	cosegragation	yes	gen	sp8			roots	phloem	intra	Prokaryota		yes	no	no			Capinera 2008 Denno and Perfect 1994 O’Brien and Wilson 1985	Denno and Perfect 1994 Novotny and Wilson 1997 O’Brien and Wilson 1985	Müller 1962	Müller 1962
Hemiptera_Cixiidae	Hemiptera	Cixiidae	Candidatus Vidania fulgoroideae	Candidatus_Vidania_fulgoroideae_of_Cixiidae	yes	cosegragation	yes	gen	sp9			roots	phloem	intra	Prokaryota		yes	no	no			Capinera 2008 Denno and Perfect 1994 O’Brien and Wilson 1985	Denno and Perfect 1994 Novotny and Wilson 1997 O’Brien and Wilson 1985	Müller 1962	Müller 1962
Hemiptera_Cixiidae	Hemiptera	Cixiidae	D-symbiont		yes		yes	gen	sp10			roots	phloem	intra	Prokaryota		yes	no	no			Capinera 2008 Denno and Perfect 1994 O’Brien and Wilson 1985	Denno and Perfect 1994 Novotny and Wilson 1997 O’Brien and Wilson 1985	Müller 1962	Müller 1962
Hemiptera_Cixiidae	Hemiptera	Cixiidae	D-symbiont		yes		yes	gen	sp11			roots	phloem	intra	Prokaryota		yes	no	no			Capinera 2008 Denno and Perfect 1994 O’Brien and Wilson 1985	Denno and Perfect 1994 Novotny and Wilson 1997 O’Brien and Wilson 1985	Müller 1962	Müller 1962
Hemiptera_Cixiidae	Hemiptera	Cixiidae	D-symbiont		yes		yes	gen	sp12			roots	phloem	intra	Prokaryota		yes	no	no			Capinera 2008 Denno and Perfect 1994 O’Brien and Wilson 1985	Denno and Perfect 1994 Novotny and Wilson 1997 O’Brien and Wilson 1985	Müller 1962	Müller 1962
Hemiptera_Cixiidae	Hemiptera	Cixiidae	D-symbiont		yes		yes	gen	sp13			roots	phloem	intra	Prokaryota		yes	no	no			Capinera 2008 Denno and Perfect 1994 O’Brien and Wilson 1985	Denno and Perfect 1994 Novotny and Wilson 1997 O’Brien and Wilson 1985	Müller 1962	Müller 1962
Hemiptera_Cixiidae	Hemiptera	Cixiidae	D-symbiont		yes		yes	gen	sp14			roots	phloem	intra	Prokaryota		yes	no	no			Capinera 2008 Denno and Perfect 1994 O’Brien and Wilson 1985	Denno and Perfect 1994 Novotny and Wilson 1997 O’Brien and Wilson 1985	Müller 1962	Müller 1962
Hemiptera_Cixiidae	Hemiptera	Cixiidae	D-symbiont		yes		yes	gen	sp15			roots	phloem	intra	Prokaryota		yes	no	no			Capinera 2008 Denno and Perfect 1994 O’Brien and Wilson 1985	Denno and Perfect 1994 Novotny and Wilson 1997 O’Brien and Wilson 1985	Müller 1962	Müller 1962
Hemiptera_Cixiidae	Hemiptera	Cixiidae	D-symbiont		yes		yes	gen	sp16			roots	phloem	intra	Prokaryota		yes	no	no			Capinera 2008 Denno and Perfect 1994 O’Brien and Wilson 1985	Denno and Perfect 1994 Novotny and Wilson 1997 O’Brien and Wilson 1985	Müller 1962	Müller 1962
Hemiptera_Cixiidae	Hemiptera	Cixiidae	D-symbiont		yes		yes	gen	sp17			roots	phloem	intra	Prokaryota		yes	no	no			Capinera 2008 Denno and Perfect 1994 O’Brien and Wilson 1985	Denno and Perfect 1994 Novotny and Wilson 1997 O’Brien and Wilson 1985	Müller 1962	Müller 1962
Hemiptera_Cixiidae	Hemiptera	Cixiidae	D-symbiont		yes		yes	gen	sp18			roots	phloem	intra	Prokaryota		yes	no	no			Capinera 2008 Denno and Perfect 1994 O’Brien and Wilson 1985	Denno and Perfect 1994 Novotny and Wilson 1997 O’Brien and Wilson 1985	Müller 1962	Müller 1962
Hemiptera_Cixiidae	Hemiptera	Cixiidae	D-symbiont		yes		yes	gen	sp19			roots	phloem	intra	Prokaryota		yes	no	no			Capinera 2008 Denno and Perfect 1994 O’Brien and Wilson 1985	Denno and Perfect 1994 Novotny and Wilson 1997 O’Brien and Wilson 1985	Müller 1962	Müller 1962
Hemiptera_Cixiidae	Hemiptera	Cixiidae	D-symbiont		yes		yes	gen	sp20			roots	phloem	intra	Prokaryota		yes	no	no			Capinera 2008 Denno and Perfect 1994 O’Brien and Wilson 1985	Denno and Perfect 1994 Novotny and Wilson 1997 O’Brien and Wilson 1985	Müller 1962	Müller 1962
Hemiptera_Cixiidae	Hemiptera	Cixiidae	D-symbiont		yes		yes	gen	sp21			roots	phloem	intra	Prokaryota		yes	no	no			Capinera 2008 Denno and Perfect 1994 O’Brien and Wilson 1985	Denno and Perfect 1994 Novotny and Wilson 1997 O’Brien and Wilson 1985	Müller 1962	Müller 1962
Hemiptera_Cixiidae	Hemiptera	Cixiidae	D-symbiont		yes		yes	gen	sp22			roots	phloem	intra	Prokaryota		yes	no	no			Capinera 2008 Denno and Perfect 1994 O’Brien and Wilson 1985	Denno and Perfect 1994 Novotny and Wilson 1997 O’Brien and Wilson 1985	Müller 1962	Müller 1962
Hemiptera_Cixiidae	Hemiptera	Cixiidae	D-symbiont		yes		yes	gen	sp23			roots	phloem	intra	Prokaryota		yes	no	no			Capinera 2008 Denno and Perfect 1994 O’Brien and Wilson 1985	Denno and Perfect 1994 Novotny and Wilson 1997 O’Brien and Wilson 1985	Müller 1962	Müller 1962
Hemiptera_Cixiidae	Hemiptera	Cixiidae	D-symbiont		yes		yes	gen	sp24			roots	phloem	intra	Prokaryota		yes	no	no			Capinera 2008 Denno and Perfect 1994 O’Brien and Wilson 1985	Denno and Perfect 1994 Novotny and Wilson 1997 O’Brien and Wilson 1985	Müller 1962	Müller 1962
Hemiptera_Cixiidae	Hemiptera	Cixiidae	D-symbiont		yes		yes	gen	sp25			roots	phloem	intra	Prokaryota		yes	no	no			Capinera 2008 Denno and Perfect 1994 O’Brien and Wilson 1985	Denno and Perfect 1994 Novotny and Wilson 1997 O’Brien and Wilson 1985	Müller 1962	Müller 1962
Hemiptera_Cixiidae	Hemiptera	Cixiidae	D-symbiont		yes		yes	gen	sp26			roots	phloem	intra	Prokaryota		yes	no	no			Capinera 2008 Denno and Perfect 1994 O’Brien and Wilson 1985	Denno and Perfect 1994 Novotny and Wilson 1997 O’Brien and Wilson 1985	Müller 1962	Müller 1962
Hemiptera_Cixiidae	Hemiptera	Cixiidae	D-symbiont		yes		yes	gen	sp9			roots	phloem	intra	Prokaryota		yes	no	no			Capinera 2008 Denno and Perfect 1994 O’Brien and Wilson 1985	Denno and Perfect 1994 Novotny and Wilson 1997 O’Brien and Wilson 1985	Müller 1962	Müller 1962
Hemiptera_Cixiidae	Hemiptera	Cixiidae	E-symbiont		yes		yes	gen	sp10			roots	phloem	intra	Prokaryota		yes	no	no			Capinera 2008 Denno and Perfect 1994 O’Brien and Wilson 1985	Denno and Perfect 1994 Novotny and Wilson 1997 O’Brien and Wilson 1985	Müller 1962	Müller 1962
Hemiptera_Cixiidae	Hemiptera	Cixiidae	E-symbiont		yes		yes	gen	sp11			roots	phloem	intra	Prokaryota		yes	no	no			Capinera 2008 Denno and Perfect 1994 O’Brien and Wilson 1985	Denno and Perfect 1994 Novotny and Wilson 1997 O’Brien and Wilson 1985	Müller 1962	Müller 1962
Hemiptera_Cixiidae	Hemiptera	Cixiidae	E-symbiont		yes		yes	gen	sp12			roots	phloem	intra	Prokaryota		yes	no	no			Capinera 2008 Denno and Perfect 1994 O’Brien and Wilson 1985	Denno and Perfect 1994 Novotny and Wilson 1997 O’Brien and Wilson 1985	Müller 1962	Müller 1962
Hemiptera_Cixiidae	Hemiptera	Cixiidae	E-symbiont		yes		yes	gen	sp13			roots	phloem	intra	Prokaryota		yes	no	no			Capinera 2008 Denno and Perfect 1994 O’Brien and Wilson 1985	Denno and Perfect 1994 Novotny and Wilson 1997 O’Brien and Wilson 1985	Müller 1962	Müller 1962
Hemiptera_Cixiidae	Hemiptera	Cixiidae	E-symbiont		yes		yes	gen	sp14			roots	phloem	intra	Prokaryota		yes	no	no			Capinera 2008 Denno and Perfect 1994 O’Brien and Wilson 1985	Denno and Perfect 1994 Novotny and Wilson 1997 O’Brien and Wilson 1985	Müller 1962	Müller 1962
Hemiptera_Cixiidae	Hemiptera	Cixiidae	E-symbiont		yes		yes	gen	sp15			roots	phloem	intra	Prokaryota		yes	no	no			Capinera 2008 Denno and Perfect 1994 O’Brien and Wilson 1985	Denno and Perfect 1994 Novotny and Wilson 1997 O’Brien and Wilson 1985	Müller 1962	Müller 1962
Hemiptera_Cixiidae	Hemiptera	Cixiidae	E-symbiont		yes		yes	gen	sp16			roots	phloem	intra	Prokaryota		yes	no	no			Capinera 2008 Denno and Perfect 1994 O’Brien and Wilson 1985	Denno and Perfect 1994 Novotny and Wilson 1997 O’Brien and Wilson 1985	Müller 1962	Müller 1962
Hemiptera_Cixiidae	Hemiptera	Cixiidae	E-symbiont		yes		yes	gen	sp17			roots	phloem	intra	Prokaryota		yes	no	no			Capinera 2008 Denno and Perfect 1994 O’Brien and Wilson 1985	Denno and Perfect 1994 Novotny and Wilson 1997 O’Brien and Wilson 1985	Müller 1962	Müller 1962
Hemiptera_Cixiidae	Hemiptera	Cixiidae	E-symbiont		yes		yes	gen	sp18			roots	phloem	intra	Prokaryota		yes	no	no			Capinera 2008 Denno and Perfect 1994 O’Brien and Wilson 1985	Denno and Perfect 1994 Novotny and Wilson 1997 O’Brien and Wilson 1985	Müller 1962	Müller 1962
Hemiptera_Cixiidae	Hemiptera	Cixiidae	E-symbiont		yes		yes	gen	sp19			roots	phloem	intra	Prokaryota		yes	no	no			Capinera 2008 Denno and Perfect 1994 O’Brien and Wilson 1985	Denno and Perfect 1994 Novotny and Wilson 1997 O’Brien and Wilson 1985	Müller 1962	Müller 1962
Hemiptera_Cixiidae	Hemiptera	Cixiidae	E-symbiont		yes		yes	gen	sp20			roots	phloem	intra	Prokaryota		yes	no	no			Capinera 2008 Denno and Perfect 1994 O’Brien and Wilson 1985	Denno and Perfect 1994 Novotny and Wilson 1997 O’Brien and Wilson 1985	Müller 1962	Müller 1962
Hemiptera_Cixiidae	Hemiptera	Cixiidae	E-symbiont		yes		yes	gen	sp21			roots	phloem	intra	Prokaryota		yes	no	no			Capinera 2008 Denno and Perfect 1994 O’Brien and Wilson 1985	Denno and Perfect 1994 Novotny and Wilson 1997 O’Brien and Wilson 1985	Müller 1962	Müller 1962
Hemiptera_Cixiidae	Hemiptera	Cixiidae	E-symbiont		yes		yes	gen	sp22			roots	phloem	intra	Prokaryota		yes	no	no			Capinera 2008 Denno and Perfect 1994 O’Brien and Wilson 1985	Denno and Perfect 1994 Novotny and Wilson 1997 O’Brien and Wilson 1985	Müller 1962	Müller 1962
Hemiptera_Cixiidae	Hemiptera	Cixiidae	E-symbiont		yes		yes	gen	sp23			roots	phloem	intra	Prokaryota		yes	no	no			Capinera 2008 Denno and Perfect 1994 O’Brien and Wilson 1985	Denno and Perfect 1994 Novotny and Wilson 1997 O’Brien and Wilson 1985	Müller 1962	Müller 1962
Hemiptera_Cixiidae	Hemiptera	Cixiidae	E-symbiont		yes		yes	gen	sp24			roots	phloem	intra	Prokaryota		yes	no	no			Capinera 2008 Denno and Perfect 1994 O’Brien and Wilson 1985	Denno and Perfect 1994 Novotny and Wilson 1997 O’Brien and Wilson 1985	Müller 1962	Müller 1962
Hemiptera_Cixiidae	Hemiptera	Cixiidae	E-symbiont		yes		yes	gen	sp25			roots	phloem	intra	Prokaryota		yes	no	no			Capinera 2008 Denno and Perfect 1994 O’Brien and Wilson 1985	Denno and Perfect 1994 Novotny and Wilson 1997 O’Brien and Wilson 1985	Müller 1962	Müller 1962
Hemiptera_Cixiidae	Hemiptera	Cixiidae	E-symbiont		yes		yes	gen	sp26			roots	phloem	intra	Prokaryota		yes	no	no			Capinera 2008 Denno and Perfect 1994 O’Brien and Wilson 1985	Denno and Perfect 1994 Novotny and Wilson 1997 O’Brien and Wilson 1985	Müller 1962	Müller 1962
Hemiptera_Cixiidae	Hemiptera	Cixiidae	E-symbiont		yes		yes	gen	sp9			roots	phloem	intra	Prokaryota		yes	no	no			Capinera 2008 Denno and Perfect 1994 O’Brien and Wilson 1985	Denno and Perfect 1994 Novotny and Wilson 1997 O’Brien and Wilson 1985	Müller 1962	Müller 1962
Hemiptera_Clastopteridae	Hemiptera	Clastopteridae	Candidatus Sulcia muelleri	Candidatus_Sulcia_muelleri_of_Clastoptera_arizonana	yes	cosegragation	yes	Clastoptera	arizonana			xylem	xylem	intra	Prokaryota		yes	no	no			Thompson 2004	Thompson 2004	Koga et al 2013A	Koga et al 2013A
Hemiptera_Clastopteridae	Hemiptera	Clastopteridae	Candidatus Sulcia muelleri	Candidatus_Sulcia_muelleri_of_Clastoptera_arizonana	yes	cosegragation	yes	Clastoptera	obtusa			xylem	xylem	intra	Prokaryota		yes	no	no			Thompson 2004	Thompson 2004	Koga et al 2013A
Hemiptera_Clastopteridae	Hemiptera	Clastopteridae	Candidatus Sulcia muelleri	Candidatus_Sulcia_muelleri_of_Clastoptera_arizonana	yes	cosegragation	yes	Clastoptera	proteus			xylem	xylem	intra	Prokaryota		yes	no	no			Thompson 2004	Thompson 2004	Koga et al 2013A
Hemiptera_Clastopteridae	Hemiptera	Clastopteridae	Candidatus Zinderia insecticola	Candidatus_Zinderia_insecticola_of_Clastopteridae	yes	cosegragation	yes	Clastoptera	arizonana			xylem	xylem	intra	Prokaryota		yes	no	no			Thompson 2004	Thompson 2004	Koga et al 2013A	Koga et al 2013A
Hemiptera_Clastopteridae	Hemiptera	Clastopteridae	Candidatus Zinderia insecticola	Candidatus_Zinderia_insecticola_of_Clastopteridae	yes	cosegragation	yes	Clastoptera	obtusa			xylem	xylem	intra	Prokaryota		yes	no	no			Thompson 2004	Thompson 2004	Koga et al 2013A
Hemiptera_Clastopteridae	Hemiptera	Clastopteridae	Candidatus Zinderia insecticola	Candidatus_Zinderia_insecticola_of_Clastopteridae	yes	cosegragation	yes	Clastoptera	proteus			xylem	xylem	intra	Prokaryota		yes	no	no			Thompson 2004	Thompson 2004	Koga et al 2013A
Hemiptera_Coccidae	Hemiptera	Coccidae	Enterobacteriaceae														no	no	no					Rosenblueth et al 2012
Hemiptera_Coccidae	Hemiptera	Coccidae	Flavobacteriales														no	no	no					Rosenblueth et al 2012
Hemiptera_Coelostomidiidae	Hemiptera	Coelostomidiidae	Candidatus Hoataupuhia coelostomidicola		yes	cosegragation	yes	Coelostomidia	zealandica			phloem	phloem	intra	Prokaryota		yes	no	no			Dhami et al 2013	Dhami et al 2013	Dhami et al 2013
Hemiptera_Coelostomidiidae	Hemiptera	Coelostomidiidae	Candidatus Hoataupuhia coelostomidicola		yes	cosegragation	yes	Ultracoelostoma	brittini			phloem	phloem	intra	Prokaryota		yes	no	no			Dhami et al 2013	Dhami et al 2013	Dhami et al 2013	Dhami et al 2013
Hemiptera_Coelostomidiidae	Hemiptera	Coelostomidiidae	Candidatus Hoataupuhia coelostomidicola		yes	cosegragation	yes	Coelostomidia	wairoensis			phloem	phloem	intra	Prokaryota		yes	no	no			Dhami et al 2013	Dhami et al 2013	Dhami et al 2013	Dhami et al 2013
Hemiptera_Coelostomidiidae	Hemiptera	Coelostomidiidae	Candidatus Hoataupuhia coelostomidicola		yes	cosegragation	yes	Coelostomidia	deboerae			phloem	phloem	intra	Prokaryota		yes	no	no			Dhami et al 2013	Dhami et al 2013	Dhami et al 2013
Hemiptera_Coelostomidiidae	Hemiptera	Coelostomidiidae	Candidatus Hoataupuhia coelostomidicola		yes	cosegragation	yes	Ultracoelostoma	dracophylli			phloem	phloem	intra	Prokaryota		yes	no	no			Dhami et al 2013	Dhami et al 2013	Dhami et al 2013
Hemiptera_Coelostomidiidae	Hemiptera	Coelostomidiidae	Candidatus Hoataupuhia coelostomidicola		yes	cosegragation	yes	Coelostomidia	jenniferae			phloem	phloem	intra	Prokaryota		yes	no	no			Dhami et al 2013	Dhami et al 2013	Dhami et al 2013
Hemiptera_Coelostomidiidae	Hemiptera	Coelostomidiidae	Candidatus Hoataupuhia coelostomidicola		yes	cosegragation	yes	Coelostomidia	montana			phloem	phloem	intra	Prokaryota		yes	no	no			Dhami et al 2013	Dhami et al 2013	Dhami et al 2013
Hemiptera_Coelostomidiidae	Hemiptera	Coelostomidiidae	Erwinia-like Bacteria														no	no	no					Dhami et al 2013
Hemiptera_Coelostomidiidae	Hemiptera	Coelostomidiidae	Sodalis-like symbiont														no	no	no					Dhami et al 2013
Hemiptera_Coreidae	Hemiptera	Coreidae	Burkholdaria	Burkholdaria_of_Coreidae_Cletus_rusticus	no (gut crypt localised symbiont)	fitness reduction	yes	Coreus	marginatus			leaves/seeds	leaves/seeds	intra			yes	yes	yes			Ohbayashi et al 2019	Ohbayashi et al 2019	Ohbayashi et al 2019	Ohbayashi et al 2019
Hemiptera_Corixidae	Hemiptera	Corixidae	none known		none known		no	gen	sp			detritus/algae/meat	detritus/algae/meat				yes	no	no			Sutton 1951 Buchner 1965	Sutton 1951 Buchner 1965	Schneider 1939	Schneider 1939
Hemiptera_Cydnidae	Hemiptera	Cydnidae	Bacteria														no	no	no					Hosokawa et al 2012A
Hemiptera_Dactylopiidae	Hemiptera	Dactylopiidae	Candidatus Dactylopiibacterium carminicum	Candidatus_Dactylopiibacterium_carminicum	yes		yes	Dactylopius	coccus			phloem	phloem	intra	Prokaryota		yes	yes	yes			De Souza 2014 Mann J 1969	De Souza 2014 Mann J 1969	Ramírez-Puebla et al 2010	Ramírez-Puebla et al 2010
Hemiptera_Delphacidae	Hemiptera	Delphacidae	Candidatus Sulcia muelleri	Candidatus_Sulcia_muelleri_of_Delphacidae	yes	cosegragation	yes	gen	sp61			phloem	phloem	intra	Prokaryota		yes	no	no			Denno and Perfect 1994 Novotny and Wilson 1997	Denno and Perfect 1994 Novotny and Wilson 1997	Müller 1962	Müller 1962
Hemiptera_Delphacidae	Hemiptera	Delphacidae	Candidatus Sulcia muelleri	Candidatus_Sulcia_muelleri_of_Delphacidae	yes	cosegragation	yes	gen	sp63			phloem	phloem	intra	Prokaryota		yes	no	no			Denno and Perfect 1994 Novotny and Wilson 1997	Denno and Perfect 1994 Novotny and Wilson 1997	Müller 1962	Müller 1962
Hemiptera_Delphacidae	Hemiptera	Delphacidae	Candidatus Sulcia muelleri	Candidatus_Sulcia_muelleri_of_Delphacidae	yes	cosegragation	yes	gen	sp64			phloem	phloem	intra	Prokaryota		yes	no	no			Denno and Perfect 1994 Novotny and Wilson 1997	Denno and Perfect 1994 Novotny and Wilson 1997	Müller 1962	Müller 1962
Hemiptera_Delphacidae	Hemiptera	Delphacidae	Candidatus Sulcia muelleri	Candidatus_Sulcia_muelleri_of_Delphacidae	yes	cosegragation	yes	gen	sp65			phloem	phloem	intra	Prokaryota		yes	no	no			Denno and Perfect 1994 Novotny and Wilson 1997	Denno and Perfect 1994 Novotny and Wilson 1997	Müller 1962	Müller 1962
Hemiptera_Delphacidae	Hemiptera	Delphacidae	Candidatus Sulcia muelleri	Candidatus_Sulcia_muelleri_of_Delphacidae	yes	cosegragation	yes	gen	sp66			phloem	phloem	intra	Prokaryota		yes	no	no			Denno and Perfect 1994 Novotny and Wilson 1997	Denno and Perfect 1994 Novotny and Wilson 1997	Müller 1962	Müller 1962
Hemiptera_Delphacidae	Hemiptera	Delphacidae	Candidatus Sulcia muelleri	Candidatus_Sulcia_muelleri_of_Delphacidae	yes	cosegragation	yes	gen	sp67			phloem	phloem	intra	Prokaryota		yes	no	no			Denno and Perfect 1994 Novotny and Wilson 1997	Denno and Perfect 1994 Novotny and Wilson 1997	Müller 1962	Müller 1962
Hemiptera_Delphacidae	Hemiptera	Delphacidae	Candidatus Sulcia muelleri	Candidatus_Sulcia_muelleri_of_Delphacidae	yes	cosegragation	yes	gen	sp68			phloem	phloem	intra	Prokaryota		yes	no	no			Denno and Perfect 1994 Novotny and Wilson 1997	Denno and Perfect 1994 Novotny and Wilson 1997	Müller 1962	Müller 1962
Hemiptera_Delphacidae	Hemiptera	Delphacidae	Candidatus Sulcia muelleri	Candidatus_Sulcia_muelleri_of_Delphacidae	yes	cosegragation	yes	gen	sp69			phloem	phloem	intra	Prokaryota		yes	no	no			Denno and Perfect 1994 Novotny and Wilson 1997	Denno and Perfect 1994 Novotny and Wilson 1997	Müller 1962	Müller 1962
Hemiptera_Delphacidae	Hemiptera	Delphacidae	Candidatus Sulcia muelleri	Candidatus_Sulcia_muelleri_of_Delphacidae	yes	cosegragation	yes	gen	sp70			phloem	phloem	intra	Prokaryota		yes	no	no			Denno and Perfect 1994 Novotny and Wilson 1997	Denno and Perfect 1994 Novotny and Wilson 1997	Müller 1962	Müller 1962
Hemiptera_Delphacidae	Hemiptera	Delphacidae	Candidatus Sulcia muelleri	Candidatus_Sulcia_muelleri_of_Delphacidae	yes	cosegragation	yes	gen	sp71			phloem	phloem	intra	Prokaryota		yes	no	no			Denno and Perfect 1994 Novotny and Wilson 1997	Denno and Perfect 1994 Novotny and Wilson 1997	Müller 1962	Müller 1962
Hemiptera_Delphacidae	Hemiptera	Delphacidae	Candidatus Sulcia muelleri	Candidatus_Sulcia_muelleri_of_Delphacidae	yes	cosegragation	yes	gen	sp72			phloem	phloem	intra	Prokaryota		yes	no	no			Denno and Perfect 1994 Novotny and Wilson 1997	Denno and Perfect 1994 Novotny and Wilson 1997	Müller 1962	Müller 1962
Hemiptera_Delphacidae	Hemiptera	Delphacidae	Candidatus Sulcia muelleri	Candidatus_Sulcia_muelleri_of_Delphacidae	yes	cosegragation	yes	gen	sp73			phloem	phloem	intra	Prokaryota		yes	no	no			Denno and Perfect 1994 Novotny and Wilson 1997	Denno and Perfect 1994 Novotny and Wilson 1997	Müller 1962	Müller 1962
Hemiptera_Delphacidae	Hemiptera	Delphacidae	Candidatus Sulcia muelleri	Candidatus_Sulcia_muelleri_of_Delphacidae	yes	cosegragation	yes	gen	sp74			phloem	phloem	intra	Prokaryota		yes	no	no			Denno and Perfect 1994 Novotny and Wilson 1997	Denno and Perfect 1994 Novotny and Wilson 1997	Müller 1962	Müller 1962
Hemiptera_Delphacidae	Hemiptera	Delphacidae	Candidatus Sulcia muelleri	Candidatus_Sulcia_muelleri_of_Delphacidae	yes	cosegragation	yes	gen	sp75			phloem	phloem	intra	Prokaryota		yes	no	no			Denno and Perfect 1994 Novotny and Wilson 1997	Denno and Perfect 1994 Novotny and Wilson 1997	Müller 1962	Müller 1962
Hemiptera_Delphacidae	Hemiptera	Delphacidae	Candidatus Vidania fulgoroideae	Candidatus_Vidania_fulgoroideae_of_Delphacidae	yes	cosegragation	yes	gen	sp62			phloem	phloem	intra	Prokaryota		yes	no	no			Denno and Perfect 1994 Novotny and Wilson 1997	Denno and Perfect 1994 Novotny and Wilson 1997	Müller 1962	Müller 1962
Hemiptera_Delphacidae	Hemiptera	Delphacidae	Candidatus Vidania fulgoroideae	Candidatus_Vidania_fulgoroideae_of_Delphacidae	yes	cosegragation	yes	gen	sp63			phloem	phloem	intra	Prokaryota		yes	no	no			Denno and Perfect 1994 Novotny and Wilson 1997	Denno and Perfect 1994 Novotny and Wilson 1997	Müller 1962	Müller 1962
Hemiptera_Delphacidae	Hemiptera	Delphacidae	Candidatus Vidania fulgoroideae	Candidatus_Vidania_fulgoroideae_of_Delphacidae	yes	cosegragation	yes	gen	sp64			phloem	phloem	intra	Prokaryota		yes	no	no			Denno and Perfect 1994 Novotny and Wilson 1997	Denno and Perfect 1994 Novotny and Wilson 1997	Müller 1962	Müller 1962
Hemiptera_Delphacidae	Hemiptera	Delphacidae	Candidatus Vidania fulgoroideae	Candidatus_Vidania_fulgoroideae_of_Delphacidae	yes	cosegragation	yes	gen	sp65			phloem	phloem	intra	Prokaryota		yes	no	no			Denno and Perfect 1994 Novotny and Wilson 1997	Denno and Perfect 1994 Novotny and Wilson 1997	Müller 1962	Müller 1962
Hemiptera_Delphacidae	Hemiptera	Delphacidae	Candidatus Vidania fulgoroideae	Candidatus_Vidania_fulgoroideae_of_Delphacidae	yes	cosegragation	yes	gen	sp66			phloem	phloem	intra	Prokaryota		yes	no	no			Denno and Perfect 1994 Novotny and Wilson 1997	Denno and Perfect 1994 Novotny and Wilson 1997	Müller 1962	Müller 1962
Hemiptera_Delphacidae	Hemiptera	Delphacidae	Candidatus Vidania fulgoroideae	Candidatus_Vidania_fulgoroideae_of_Delphacidae	yes	cosegragation	yes	gen	sp67			phloem	phloem	intra	Prokaryota		yes	no	no			Denno and Perfect 1994 Novotny and Wilson 1997	Denno and Perfect 1994 Novotny and Wilson 1997	Müller 1962	Müller 1962
Hemiptera_Delphacidae	Hemiptera	Delphacidae	Candidatus Vidania fulgoroideae	Candidatus_Vidania_fulgoroideae_of_Delphacidae	yes	cosegragation	yes	gen	sp68			phloem	phloem	intra	Prokaryota		yes	no	no			Denno and Perfect 1994 Novotny and Wilson 1997	Denno and Perfect 1994 Novotny and Wilson 1997	Müller 1962	Müller 1962
Hemiptera_Delphacidae	Hemiptera	Delphacidae	Candidatus Vidania fulgoroideae	Candidatus_Vidania_fulgoroideae_of_Delphacidae	yes	cosegragation	yes	gen	sp69			phloem	phloem	intra	Prokaryota		yes	no	no			Denno and Perfect 1994 Novotny and Wilson 1997	Denno and Perfect 1994 Novotny and Wilson 1997	Müller 1962	Müller 1962
Hemiptera_Delphacidae	Hemiptera	Delphacidae	Candidatus Vidania fulgoroideae	Candidatus_Vidania_fulgoroideae_of_Delphacidae	yes	cosegragation	yes	gen	sp70			phloem	phloem	intra	Prokaryota		yes	no	no			Denno and Perfect 1994 Novotny and Wilson 1997	Denno and Perfect 1994 Novotny and Wilson 1997	Müller 1962	Müller 1962
Hemiptera_Delphacidae	Hemiptera	Delphacidae	Candidatus Vidania fulgoroideae	Candidatus_Vidania_fulgoroideae_of_Delphacidae	yes	cosegragation	yes	gen	sp71			phloem	phloem	intra	Prokaryota		yes	no	no			Denno and Perfect 1994 Novotny and Wilson 1997	Denno and Perfect 1994 Novotny and Wilson 1997	Müller 1962	Müller 1962
Hemiptera_Delphacidae	Hemiptera	Delphacidae	Candidatus Vidania fulgoroideae	Candidatus_Vidania_fulgoroideae_of_Delphacidae	yes	cosegragation	yes	gen	sp72			phloem	phloem	intra	Prokaryota		yes	no	no			Denno and Perfect 1994 Novotny and Wilson 1997	Denno and Perfect 1994 Novotny and Wilson 1997	Müller 1962	Müller 1962
Hemiptera_Delphacidae	Hemiptera	Delphacidae	Candidatus Vidania fulgoroideae	Candidatus_Vidania_fulgoroideae_of_Delphacidae	yes	cosegragation	yes	gen	sp73			phloem	phloem	intra	Prokaryota		yes	no	no			Denno and Perfect 1994 Novotny and Wilson 1997	Denno and Perfect 1994 Novotny and Wilson 1997	Müller 1962	Müller 1962
Hemiptera_Delphacidae	Hemiptera	Delphacidae	Candidatus Vidania fulgoroideae	Candidatus_Vidania_fulgoroideae_of_Delphacidae	yes	cosegragation	yes	gen	sp74			phloem	phloem	intra	Prokaryota		yes	no	no			Denno and Perfect 1994 Novotny and Wilson 1997	Denno and Perfect 1994 Novotny and Wilson 1997	Müller 1962	Müller 1962
Hemiptera_Delphacidae	Hemiptera	Delphacidae	Candidatus Vidania fulgoroideae	Candidatus_Vidania_fulgoroideae_of_Delphacidae	yes	cosegragation	yes	gen	sp75			phloem	phloem	intra	Prokaryota		yes	no	no			Denno and Perfect 1994 Novotny and Wilson 1997	Denno and Perfect 1994 Novotny and Wilson 1997	Müller 1962	Müller 1962
Hemiptera_Delphacidae	Hemiptera	Delphacidae	Candidatus Vidania fulgoroideae	Candidatus_Vidania_fulgoroideae_of_Delphacidae	yes	cosegragation	yes	gen	sp76			phloem	phloem	intra	Prokaryota		yes	no	no			Denno and Perfect 1994 Novotny and Wilson 1997	Denno and Perfect 1994 Novotny and Wilson 1997	Müller 1962	Müller 1962
Hemiptera_Delphacidae	Hemiptera	Delphacidae	Candidatus Vidania fulgoroideae	Candidatus_Vidania_fulgoroideae_of_Delphacidae	yes	cosegragation	yes	gen	sp77			phloem	phloem	intra	Prokaryota		yes	no	no			Denno and Perfect 1994 Novotny and Wilson 1997	Denno and Perfect 1994 Novotny and Wilson 1997	Müller 1962	Müller 1962
Hemiptera_Delphacidae	Hemiptera	Delphacidae	Candidatus Vidania fulgoroideae	Candidatus_Vidania_fulgoroideae_of_Delphacidae	yes	cosegragation	yes	gen	sp78			phloem	phloem	intra	Prokaryota		yes	no	no			Denno and Perfect 1994 Novotny and Wilson 1997	Denno and Perfect 1994 Novotny and Wilson 1997	Müller 1962	Müller 1962
Hemiptera_Delphacidae	Hemiptera	Delphacidae	Candidatus Vidania fulgoroideae	Candidatus_Vidania_fulgoroideae_of_Delphacidae	yes	cosegragation	yes	gen	sp79			phloem	phloem	intra	Prokaryota		yes	no	no			Denno and Perfect 1994 Novotny and Wilson 1997	Denno and Perfect 1994 Novotny and Wilson 1997	Müller 1962	Müller 1962
Hemiptera_Delphacidae	Hemiptera	Delphacidae	Candidatus Vidania fulgoroideae	Candidatus_Vidania_fulgoroideae_of_Delphacidae	yes	cosegragation	yes	gen	sp80			phloem	phloem	intra	Prokaryota		yes	no	no			Denno and Perfect 1994 Novotny and Wilson 1997	Denno and Perfect 1994 Novotny and Wilson 1997	Müller 1962	Müller 1962
Hemiptera_Delphacidae	Hemiptera	Delphacidae	Candidatus Vidania fulgoroideae	Candidatus_Vidania_fulgoroideae_of_Delphacidae	yes	cosegragation	yes	gen	sp81			phloem	phloem	intra	Prokaryota		yes	no	no			Denno and Perfect 1994 Novotny and Wilson 1997	Denno and Perfect 1994 Novotny and Wilson 1997	Müller 1962	Müller 1962
Hemiptera_Delphacidae	Hemiptera	Delphacidae	Candidatus Vidania fulgoroideae	Candidatus_Vidania_fulgoroideae_of_Delphacidae	yes	cosegragation	yes	gen	sp82			phloem	phloem	intra	Prokaryota		yes	no	no			Denno and Perfect 1994 Novotny and Wilson 1997	Denno and Perfect 1994 Novotny and Wilson 1997	Müller 1962	Müller 1962
Hemiptera_Delphacidae	Hemiptera	Delphacidae	F-symbiont		yes		yes	gen	sp100			phloem	phloem	intra	Prokaryota		yes	no	no			Denno and Perfect 1994 Novotny and Wilson 1997	Denno and Perfect 1994 Novotny and Wilson 1997	Müller 1962	Müller 1962
Hemiptera_Delphacidae	Hemiptera	Delphacidae	F-symbiont		yes		yes	gen	sp101			phloem	phloem	intra	Prokaryota		yes	no	no			Denno and Perfect 1994 Novotny and Wilson 1997	Denno and Perfect 1994 Novotny and Wilson 1997	Müller 1962	Müller 1962
Hemiptera_Delphacidae	Hemiptera	Delphacidae	F-symbiont		yes		yes	gen	sp102			phloem	phloem	intra	Prokaryota		yes	no	no			Denno and Perfect 1994 Novotny and Wilson 1997	Denno and Perfect 1994 Novotny and Wilson 1997	Müller 1962	Müller 1962
Hemiptera_Delphacidae	Hemiptera	Delphacidae	F-symbiont		yes		yes	gen	sp103			phloem	phloem	intra	Prokaryota		yes	no	no			Denno and Perfect 1994 Novotny and Wilson 1997	Denno and Perfect 1994 Novotny and Wilson 1997	Müller 1962	Müller 1962
Hemiptera_Delphacidae	Hemiptera	Delphacidae	F-symbiont		yes		yes	gen	sp104			phloem	phloem	intra	Prokaryota		yes	no	no			Denno and Perfect 1994 Novotny and Wilson 1997	Denno and Perfect 1994 Novotny and Wilson 1997	Müller 1962	Müller 1962
Hemiptera_Delphacidae	Hemiptera	Delphacidae	F-symbiont		yes		yes	gen	sp105			phloem	phloem	intra	Prokaryota		yes	no	no			Denno and Perfect 1994 Novotny and Wilson 1997	Denno and Perfect 1994 Novotny and Wilson 1997	Müller 1962	Müller 1962
Hemiptera_Delphacidae	Hemiptera	Delphacidae	F-symbiont		yes		yes	gen	sp106			phloem	phloem	intra	Prokaryota		yes	no	no			Denno and Perfect 1994 Novotny and Wilson 1997	Denno and Perfect 1994 Novotny and Wilson 1997	Müller 1962	Müller 1962
Hemiptera_Delphacidae	Hemiptera	Delphacidae	F-symbiont		yes		yes	gen	sp107			phloem	phloem	intra	Prokaryota		yes	no	no			Denno and Perfect 1994 Novotny and Wilson 1997	Denno and Perfect 1994 Novotny and Wilson 1997	Müller 1962	Müller 1962
Hemiptera_Delphacidae	Hemiptera	Delphacidae	F-symbiont		yes		yes	gen	sp108			phloem	phloem	intra	Prokaryota		yes	no	no			Denno and Perfect 1994 Novotny and Wilson 1997	Denno and Perfect 1994 Novotny and Wilson 1997	Müller 1962	Müller 1962
Hemiptera_Delphacidae	Hemiptera	Delphacidae	F-symbiont		yes		yes	gen	sp109			phloem	phloem	intra	Prokaryota		yes	no	no			Denno and Perfect 1994 Novotny and Wilson 1997	Denno and Perfect 1994 Novotny and Wilson 1997	Müller 1962	Müller 1962
Hemiptera_Delphacidae	Hemiptera	Delphacidae	F-symbiont		yes		yes	gen	sp110			phloem	phloem	intra	Prokaryota		yes	no	no			Denno and Perfect 1994 Novotny and Wilson 1997	Denno and Perfect 1994 Novotny and Wilson 1997	Müller 1962	Müller 1962
Hemiptera_Delphacidae	Hemiptera	Delphacidae	F-symbiont		yes		yes	gen	sp111			phloem	phloem	intra	Prokaryota		yes	no	no			Denno and Perfect 1994 Novotny and Wilson 1997	Denno and Perfect 1994 Novotny and Wilson 1997	Müller 1962	Müller 1962
Hemiptera_Delphacidae	Hemiptera	Delphacidae	F-symbiont		yes		yes	gen	sp112			phloem	phloem	intra	Prokaryota		yes	no	no			Denno and Perfect 1994 Novotny and Wilson 1997	Denno and Perfect 1994 Novotny and Wilson 1997	Müller 1962	Müller 1962
Hemiptera_Delphacidae	Hemiptera	Delphacidae	F-symbiont		yes		yes	gen	sp113			phloem	phloem	intra	Prokaryota		yes	no	no			Denno and Perfect 1994 Novotny and Wilson 1997	Denno and Perfect 1994 Novotny and Wilson 1997	Müller 1962	Müller 1962
Hemiptera_Delphacidae	Hemiptera	Delphacidae	F-symbiont		yes		yes	gen	sp114			phloem	phloem	intra	Prokaryota		yes	no	no			Denno and Perfect 1994 Novotny and Wilson 1997	Denno and Perfect 1994 Novotny and Wilson 1997	Müller 1962	Müller 1962
Hemiptera_Delphacidae	Hemiptera	Delphacidae	F-symbiont		yes		yes	gen	sp115			phloem	phloem	intra	Prokaryota		yes	no	no			Denno and Perfect 1994 Novotny and Wilson 1997	Denno and Perfect 1994 Novotny and Wilson 1997	Müller 1962	Müller 1962
Hemiptera_Delphacidae	Hemiptera	Delphacidae	F-symbiont		yes		yes	gen	sp116			phloem	phloem	intra	Prokaryota		yes	no	no			Denno and Perfect 1994 Novotny and Wilson 1997	Denno and Perfect 1994 Novotny and Wilson 1997	Müller 1962	Müller 1962
Hemiptera_Delphacidae	Hemiptera	Delphacidae	F-symbiont		yes		yes	gen	sp117			phloem	phloem	intra	Prokaryota		yes	no	no			Denno and Perfect 1994 Novotny and Wilson 1997	Denno and Perfect 1994 Novotny and Wilson 1997	Müller 1962	Müller 1962
Hemiptera_Delphacidae	Hemiptera	Delphacidae	F-symbiont		yes		yes	gen	sp118			phloem	phloem	intra	Prokaryota		yes	no	no			Denno and Perfect 1994 Novotny and Wilson 1997	Denno and Perfect 1994 Novotny and Wilson 1997	Müller 1962	Müller 1962
Hemiptera_Delphacidae	Hemiptera	Delphacidae	F-symbiont		yes		yes	gen	sp119			phloem	phloem	intra	Prokaryota		yes	no	no			Denno and Perfect 1994 Novotny and Wilson 1997	Denno and Perfect 1994 Novotny and Wilson 1997	Müller 1962	Müller 1962
Hemiptera_Delphacidae	Hemiptera	Delphacidae	F-symbiont		yes		yes	gen	sp120			phloem	phloem	intra	Prokaryota		yes	no	no			Denno and Perfect 1994 Novotny and Wilson 1997	Denno and Perfect 1994 Novotny and Wilson 1997	Müller 1962	Müller 1962
Hemiptera_Delphacidae	Hemiptera	Delphacidae	F-symbiont		yes		yes	gen	sp121			phloem	phloem	intra	Prokaryota		yes	no	no			Denno and Perfect 1994 Novotny and Wilson 1997	Denno and Perfect 1994 Novotny and Wilson 1997	Müller 1962	Müller 1962
Hemiptera_Delphacidae	Hemiptera	Delphacidae	F-symbiont		yes		yes	gen	sp122			phloem	phloem	intra	Prokaryota		yes	no	no			Denno and Perfect 1994 Novotny and Wilson 1997	Denno and Perfect 1994 Novotny and Wilson 1997	Müller 1962	Müller 1962
Hemiptera_Delphacidae	Hemiptera	Delphacidae	F-symbiont		yes		yes	gen	sp123			phloem	phloem	intra	Prokaryota		yes	no	no			Denno and Perfect 1994 Novotny and Wilson 1997	Denno and Perfect 1994 Novotny and Wilson 1997	Müller 1962	Müller 1962
Hemiptera_Delphacidae	Hemiptera	Delphacidae	F-symbiont		yes		yes	gen	sp124			phloem	phloem	intra	Prokaryota		yes	no	no			Denno and Perfect 1994 Novotny and Wilson 1997	Denno and Perfect 1994 Novotny and Wilson 1997	Müller 1962	Müller 1962
Hemiptera_Delphacidae	Hemiptera	Delphacidae	F-symbiont		yes		yes	gen	sp125			phloem	phloem	intra	Prokaryota		yes	no	no			Denno and Perfect 1994 Novotny and Wilson 1997	Denno and Perfect 1994 Novotny and Wilson 1997	Müller 1962	Müller 1962
Hemiptera_Delphacidae	Hemiptera	Delphacidae	F-symbiont		yes		yes	gen	sp126			phloem	phloem	intra	Prokaryota		yes	no	no			Denno and Perfect 1994 Novotny and Wilson 1997	Denno and Perfect 1994 Novotny and Wilson 1997	Müller 1962	Müller 1962
Hemiptera_Delphacidae	Hemiptera	Delphacidae	F-symbiont		yes		yes	gen	sp127			phloem	phloem	intra	Prokaryota		yes	no	no			Denno and Perfect 1994 Novotny and Wilson 1997	Denno and Perfect 1994 Novotny and Wilson 1997	Müller 1962	Müller 1962
Hemiptera_Delphacidae	Hemiptera	Delphacidae	F-symbiont		yes		yes	gen	sp128			phloem	phloem	intra	Prokaryota		yes	no	no			Denno and Perfect 1994 Novotny and Wilson 1997	Denno and Perfect 1994 Novotny and Wilson 1997	Müller 1962	Müller 1962
Hemiptera_Delphacidae	Hemiptera	Delphacidae	F-symbiont		yes		yes	gen	sp129			phloem	phloem	intra	Prokaryota		yes	no	no			Denno and Perfect 1994 Novotny and Wilson 1997	Denno and Perfect 1994 Novotny and Wilson 1997	Müller 1962	Müller 1962
Hemiptera_Delphacidae	Hemiptera	Delphacidae	F-symbiont		yes		yes	gen	sp130			phloem	phloem	intra	Prokaryota		yes	no	no			Denno and Perfect 1994 Novotny and Wilson 1997	Denno and Perfect 1994 Novotny and Wilson 1997	Müller 1962	Müller 1962
Hemiptera_Delphacidae	Hemiptera	Delphacidae	F-symbiont		yes		yes	gen	sp131			phloem	phloem	intra	Prokaryota		yes	no	no			Denno and Perfect 1994 Novotny and Wilson 1997	Denno and Perfect 1994 Novotny and Wilson 1997	Müller 1962	Müller 1962
Hemiptera_Delphacidae	Hemiptera	Delphacidae	F-symbiont		yes		yes	gen	sp132			phloem	phloem	intra	Prokaryota		yes	no	no			Denno and Perfect 1994 Novotny and Wilson 1997	Denno and Perfect 1994 Novotny and Wilson 1997	Müller 1962	Müller 1962
Hemiptera_Delphacidae	Hemiptera	Delphacidae	F-symbiont		yes		yes	gen	sp133			phloem	phloem	intra	Prokaryota		yes	no	no			Denno and Perfect 1994 Novotny and Wilson 1997	Denno and Perfect 1994 Novotny and Wilson 1997	Müller 1962	Müller 1962
Hemiptera_Delphacidae	Hemiptera	Delphacidae	F-symbiont		yes		yes	gen	sp134			phloem	phloem	intra	Prokaryota		yes	no	no			Denno and Perfect 1994 Novotny and Wilson 1997	Denno and Perfect 1994 Novotny and Wilson 1997	Müller 1962	Müller 1962
Hemiptera_Delphacidae	Hemiptera	Delphacidae	F-symbiont		yes		yes	gen	sp135			phloem	phloem	intra	Prokaryota		yes	no	no			Denno and Perfect 1994 Novotny and Wilson 1997	Denno and Perfect 1994 Novotny and Wilson 1997	Müller 1962	Müller 1962
Hemiptera_Delphacidae	Hemiptera	Delphacidae	F-symbiont		yes		yes	gen	sp136			phloem	phloem	intra	Prokaryota		yes	no	no			Denno and Perfect 1994 Novotny and Wilson 1997	Denno and Perfect 1994 Novotny and Wilson 1997	Müller 1962	Müller 1962
Hemiptera_Delphacidae	Hemiptera	Delphacidae	F-symbiont		yes		yes	gen	sp76			phloem	phloem	intra	Prokaryota		yes	no	no			Denno and Perfect 1994 Novotny and Wilson 1997	Denno and Perfect 1994 Novotny and Wilson 1997	Müller 1962	Müller 1962
Hemiptera_Delphacidae	Hemiptera	Delphacidae	F-symbiont		yes		yes	gen	sp77			phloem	phloem	intra	Prokaryota		yes	no	no			Denno and Perfect 1994 Novotny and Wilson 1997	Denno and Perfect 1994 Novotny and Wilson 1997	Müller 1962	Müller 1962
Hemiptera_Delphacidae	Hemiptera	Delphacidae	F-symbiont		yes		yes	gen	sp78			phloem	phloem	intra	Prokaryota		yes	no	no			Denno and Perfect 1994 Novotny and Wilson 1997	Denno and Perfect 1994 Novotny and Wilson 1997	Müller 1962	Müller 1962
Hemiptera_Delphacidae	Hemiptera	Delphacidae	F-symbiont		yes		yes	gen	sp79			phloem	phloem	intra	Prokaryota		yes	no	no			Denno and Perfect 1994 Novotny and Wilson 1997	Denno and Perfect 1994 Novotny and Wilson 1997	Müller 1962	Müller 1962
Hemiptera_Delphacidae	Hemiptera	Delphacidae	F-symbiont		yes		yes	gen	sp80			phloem	phloem	intra	Prokaryota		yes	no	no			Denno and Perfect 1994 Novotny and Wilson 1997	Denno and Perfect 1994 Novotny and Wilson 1997	Müller 1962	Müller 1962
Hemiptera_Delphacidae	Hemiptera	Delphacidae	F-symbiont		yes		yes	gen	sp81			phloem	phloem	intra	Prokaryota		yes	no	no			Denno and Perfect 1994 Novotny and Wilson 1997	Denno and Perfect 1994 Novotny and Wilson 1997	Müller 1962	Müller 1962
Hemiptera_Delphacidae	Hemiptera	Delphacidae	F-symbiont		yes		yes	gen	sp82			phloem	phloem	intra	Prokaryota		yes	no	no			Denno and Perfect 1994 Novotny and Wilson 1997	Denno and Perfect 1994 Novotny and Wilson 1997	Müller 1962	Müller 1962
Hemiptera_Delphacidae	Hemiptera	Delphacidae	F-symbiont		yes		yes	gen	sp83			phloem	phloem	intra	Prokaryota		yes	no	no			Denno and Perfect 1994 Novotny and Wilson 1997	Denno and Perfect 1994 Novotny and Wilson 1997	Müller 1962	Müller 1962
Hemiptera_Delphacidae	Hemiptera	Delphacidae	F-symbiont		yes		yes	gen	sp84			phloem	phloem	intra	Prokaryota		yes	no	no			Denno and Perfect 1994 Novotny and Wilson 1997	Denno and Perfect 1994 Novotny and Wilson 1997	Müller 1962	Müller 1962
Hemiptera_Delphacidae	Hemiptera	Delphacidae	F-symbiont		yes		yes	gen	sp85			phloem	phloem	intra	Prokaryota		yes	no	no			Denno and Perfect 1994 Novotny and Wilson 1997	Denno and Perfect 1994 Novotny and Wilson 1997	Müller 1962	Müller 1962
Hemiptera_Delphacidae	Hemiptera	Delphacidae	F-symbiont		yes		yes	gen	sp86			phloem	phloem	intra	Prokaryota		yes	no	no			Denno and Perfect 1994 Novotny and Wilson 1997	Denno and Perfect 1994 Novotny and Wilson 1997	Müller 1962	Müller 1962
Hemiptera_Delphacidae	Hemiptera	Delphacidae	F-symbiont		yes		yes	gen	sp87			phloem	phloem	intra	Prokaryota		yes	no	no			Denno and Perfect 1994 Novotny and Wilson 1997	Denno and Perfect 1994 Novotny and Wilson 1997	Müller 1962	Müller 1962
Hemiptera_Delphacidae	Hemiptera	Delphacidae	F-symbiont		yes		yes	gen	sp88			phloem	phloem	intra	Prokaryota		yes	no	no			Denno and Perfect 1994 Novotny and Wilson 1997	Denno and Perfect 1994 Novotny and Wilson 1997	Müller 1962	Müller 1962
Hemiptera_Delphacidae	Hemiptera	Delphacidae	F-symbiont		yes		yes	gen	sp89			phloem	phloem	intra	Prokaryota		yes	no	no			Denno and Perfect 1994 Novotny and Wilson 1997	Denno and Perfect 1994 Novotny and Wilson 1997	Müller 1962	Müller 1962
Hemiptera_Delphacidae	Hemiptera	Delphacidae	F-symbiont		yes		yes	gen	sp90			phloem	phloem	intra	Prokaryota		yes	no	no			Denno and Perfect 1994 Novotny and Wilson 1997	Denno and Perfect 1994 Novotny and Wilson 1997	Müller 1962	Müller 1962
Hemiptera_Delphacidae	Hemiptera	Delphacidae	F-symbiont		yes		yes	gen	sp91			phloem	phloem	intra	Prokaryota		yes	no	no			Denno and Perfect 1994 Novotny and Wilson 1997	Denno and Perfect 1994 Novotny and Wilson 1997	Müller 1962	Müller 1962
Hemiptera_Delphacidae	Hemiptera	Delphacidae	F-symbiont		yes		yes	gen	sp92			phloem	phloem	intra	Prokaryota		yes	no	no			Denno and Perfect 1994 Novotny and Wilson 1997	Denno and Perfect 1994 Novotny and Wilson 1997	Müller 1962	Müller 1962
Hemiptera_Delphacidae	Hemiptera	Delphacidae	F-symbiont		yes		yes	gen	sp93			phloem	phloem	intra	Prokaryota		yes	no	no			Denno and Perfect 1994 Novotny and Wilson 1997	Denno and Perfect 1994 Novotny and Wilson 1997	Müller 1962	Müller 1962
Hemiptera_Delphacidae	Hemiptera	Delphacidae	F-symbiont		yes		yes	gen	sp94			phloem	phloem	intra	Prokaryota		yes	no	no			Denno and Perfect 1994 Novotny and Wilson 1997	Denno and Perfect 1994 Novotny and Wilson 1997	Müller 1962	Müller 1962
Hemiptera_Delphacidae	Hemiptera	Delphacidae	F-symbiont		yes		yes	gen	sp95			phloem	phloem	intra	Prokaryota		yes	no	no			Denno and Perfect 1994 Novotny and Wilson 1997	Denno and Perfect 1994 Novotny and Wilson 1997	Müller 1962	Müller 1962
Hemiptera_Delphacidae	Hemiptera	Delphacidae	F-symbiont		yes		yes	gen	sp96			phloem	phloem	intra	Prokaryota		yes	no	no			Denno and Perfect 1994 Novotny and Wilson 1997	Denno and Perfect 1994 Novotny and Wilson 1997	Müller 1962	Müller 1962
Hemiptera_Delphacidae	Hemiptera	Delphacidae	F-symbiont		yes		yes	gen	sp97			phloem	phloem	intra	Prokaryota		yes	no	no			Denno and Perfect 1994 Novotny and Wilson 1997	Denno and Perfect 1994 Novotny and Wilson 1997	Müller 1962	Müller 1962
Hemiptera_Delphacidae	Hemiptera	Delphacidae	F-symbiont		yes		yes	gen	sp98			phloem	phloem	intra	Prokaryota		yes	no	no			Denno and Perfect 1994 Novotny and Wilson 1997	Denno and Perfect 1994 Novotny and Wilson 1997	Müller 1962	Müller 1962
Hemiptera_Delphacidae	Hemiptera	Delphacidae	F-symbiont		yes		yes	gen	sp99			phloem	phloem	intra	Prokaryota		yes	no	no			Denno and Perfect 1994 Novotny and Wilson 1997	Denno and Perfect 1994 Novotny and Wilson 1997	Müller 1962	Müller 1962
Hemiptera_Delphacidae	Hemiptera	Delphacidae	Fungi		yes		yes	Conomelus	anceps			phloem	phloem	intra	Eukaryota		yes	no	no			Denno and Perfect 1994 Novotny and Wilson 1997	Denno and Perfect 1994 Novotny and Wilson 1997	Michalik et al 2009	Michalik et al 2009
Hemiptera_Delphacidae	Hemiptera	Delphacidae	Fungi		yes		yes	Sogatella	furcifera	phloem	phloem	phloem	phloem	intra	Eukaryota		yes	no	no	Khan and Saxena 1986	Khan and Saxena 1986	Denno and Perfect 1994 Novotny and Wilson 1997	Denno and Perfect 1994 Novotny and Wilson 1997	Nasu et al 1981	Nasu et al 1981
Hemiptera_Delphacidae	Hemiptera	Delphacidae	Fungi		yes		yes	Nilaparvata	lugens	phloem	phloem	phloem	phloem	intra	Eukaryota		yes	no	no	Khan and Saxena 1986	Khan and Saxena 1986	Denno and Perfect 1994 Novotny and Wilson 1997	Denno and Perfect 1994 Novotny and Wilson 1997	Nasu et al 1981	Nasu et al 1981
Hemiptera_Delphacidae	Hemiptera	Delphacidae	Fungi		yes		yes	Laodelphax	striatellus	phloem	phloem	phloem	phloem	intra	Eukaryota		yes	no	no	Zhou et al 2012	Zhou et al 2012	Denno and Perfect 1994 Novotny and Wilson 1997	Denno and Perfect 1994 Novotny and Wilson 1997	Noda 1977	Noda 1977
Hemiptera_Delphacidae	Hemiptera	Delphacidae	H-symbiont														no	no	no					Müller 1962
Hemiptera_Delphacidae	Hemiptera	Delphacidae	P-symbiont		yes		yes	gen	sp63			phloem	phloem	intra	Prokaryota		yes	no	no			Denno and Perfect 1994 Novotny and Wilson 1997	Denno and Perfect 1994 Novotny and Wilson 1997	Müller 1962	Müller 1962
Hemiptera_Delphacidae	Hemiptera	Delphacidae	P-symbiont		yes		yes	gen	sp64			phloem	phloem	intra	Prokaryota		yes	no	no			Denno and Perfect 1994 Novotny and Wilson 1997	Denno and Perfect 1994 Novotny and Wilson 1997	Müller 1962	Müller 1962
Hemiptera_Delphacidae	Hemiptera	Delphacidae	P-symbiont		yes		yes	gen	sp65			phloem	phloem	intra	Prokaryota		yes	no	no			Denno and Perfect 1994 Novotny and Wilson 1997	Denno and Perfect 1994 Novotny and Wilson 1997	Müller 1962	Müller 1962
Hemiptera_Delphacidae	Hemiptera	Delphacidae	P-symbiont		yes		yes	gen	sp66			phloem	phloem	intra	Prokaryota		yes	no	no			Denno and Perfect 1994 Novotny and Wilson 1997	Denno and Perfect 1994 Novotny and Wilson 1997	Müller 1962	Müller 1962
Hemiptera_Delphacidae	Hemiptera	Delphacidae	P-symbiont		yes		yes	gen	sp67			phloem	phloem	intra	Prokaryota		yes	no	no			Denno and Perfect 1994 Novotny and Wilson 1997	Denno and Perfect 1994 Novotny and Wilson 1997	Müller 1962	Müller 1962
Hemiptera_Delphacidae	Hemiptera	Delphacidae	P-symbiont		yes		yes	gen	sp68			phloem	phloem	intra	Prokaryota		yes	no	no			Denno and Perfect 1994 Novotny and Wilson 1997	Denno and Perfect 1994 Novotny and Wilson 1997	Müller 1962	Müller 1962
Hemiptera_Delphacidae	Hemiptera	Delphacidae	P-symbiont		yes		yes	gen	sp69			phloem	phloem	intra	Prokaryota		yes	no	no			Denno and Perfect 1994 Novotny and Wilson 1997	Denno and Perfect 1994 Novotny and Wilson 1997	Müller 1962	Müller 1962
Hemiptera_Delphacidae	Hemiptera	Delphacidae	P-symbiont		yes		yes	gen	sp70			phloem	phloem	intra	Prokaryota		yes	no	no			Denno and Perfect 1994 Novotny and Wilson 1997	Denno and Perfect 1994 Novotny and Wilson 1997	Müller 1962	Müller 1962
Hemiptera_Delphacidae	Hemiptera	Delphacidae	P-symbiont		yes		yes	gen	sp71			phloem	phloem	intra	Prokaryota		yes	no	no			Denno and Perfect 1994 Novotny and Wilson 1997	Denno and Perfect 1994 Novotny and Wilson 1997	Müller 1962	Müller 1962
Hemiptera_Delphacidae	Hemiptera	Delphacidae	P-symbiont		yes		yes	gen	sp72			phloem	phloem	intra	Prokaryota		yes	no	no			Denno and Perfect 1994 Novotny and Wilson 1997	Denno and Perfect 1994 Novotny and Wilson 1997	Müller 1962	Müller 1962
Hemiptera_Delphacidae	Hemiptera	Delphacidae	P-symbiont		yes		yes	gen	sp73			phloem	phloem	intra	Prokaryota		yes	no	no			Denno and Perfect 1994 Novotny and Wilson 1997	Denno and Perfect 1994 Novotny and Wilson 1997	Müller 1962	Müller 1962
Hemiptera_Delphacidae	Hemiptera	Delphacidae	P-symbiont		yes		yes	gen	sp74			phloem	phloem	intra	Prokaryota		yes	no	no			Denno and Perfect 1994 Novotny and Wilson 1997	Denno and Perfect 1994 Novotny and Wilson 1997	Müller 1962	Müller 1962
Hemiptera_Delphacidae	Hemiptera	Delphacidae	P-symbiont		yes		yes	gen	sp75			phloem	phloem	intra	Prokaryota		yes	no	no			Denno and Perfect 1994 Novotny and Wilson 1997	Denno and Perfect 1994 Novotny and Wilson 1997	Müller 1962	Müller 1962
Hemiptera_Delphacidae	Hemiptera	Delphacidae	R-symbiont		yes		yes	gen	sp76			phloem	phloem	intra	Prokaryota		yes	no	no			Denno and Perfect 1994 Novotny and Wilson 1997	Denno and Perfect 1994 Novotny and Wilson 1997	Müller 1962	Müller 1962
Hemiptera_Delphacidae	Hemiptera	Delphacidae	R-symbiont		yes		yes	gen	sp77			phloem	phloem	intra	Prokaryota		yes	no	no			Denno and Perfect 1994 Novotny and Wilson 1997	Denno and Perfect 1994 Novotny and Wilson 1997	Müller 1962	Müller 1962
Hemiptera_Delphacidae	Hemiptera	Delphacidae	R-symbiont		yes		yes	gen	sp78			phloem	phloem	intra	Prokaryota		yes	no	no			Denno and Perfect 1994 Novotny and Wilson 1997	Denno and Perfect 1994 Novotny and Wilson 1997	Müller 1962	Müller 1962
Hemiptera_Delphacidae	Hemiptera	Delphacidae	R-symbiont		yes		yes	gen	sp79			phloem	phloem	intra	Prokaryota		yes	no	no			Denno and Perfect 1994 Novotny and Wilson 1997	Denno and Perfect 1994 Novotny and Wilson 1997	Müller 1962	Müller 1962
Hemiptera_Delphacidae	Hemiptera	Delphacidae	R-symbiont		yes		yes	gen	sp80			phloem	phloem	intra	Prokaryota		yes	no	no			Denno and Perfect 1994 Novotny and Wilson 1997	Denno and Perfect 1994 Novotny and Wilson 1997	Müller 1962	Müller 1962
Hemiptera_Delphacidae	Hemiptera	Delphacidae	R-symbiont		yes		yes	gen	sp81			phloem	phloem	intra	Prokaryota		yes	no	no			Denno and Perfect 1994 Novotny and Wilson 1997	Denno and Perfect 1994 Novotny and Wilson 1997	Müller 1962	Müller 1962
Hemiptera_Delphacidae	Hemiptera	Delphacidae	R-symbiont		yes		yes	gen	sp82			phloem	phloem	intra	Prokaryota		yes	no	no			Denno and Perfect 1994 Novotny and Wilson 1997	Denno and Perfect 1994 Novotny and Wilson 1997	Müller 1962	Müller 1962
Hemiptera_Derbidae	Hemiptera	Derbidae	B-symbiont		yes		yes	gen	sp54			fungi	phloem	intra	Prokaryota		yes	no	no			Dem et al 2013 Novotny and Wilson 1997	Dem et al 2013 Novotny and Wilson 1997	Müller 1962	Müller 1962
Hemiptera_Derbidae	Hemiptera	Derbidae	Candidatus Sulcia muelleri		yes	cosegragation	yes	gen	sp37			fungi	phloem	intra	Prokaryota		yes	no	no			Dem et al 2013 Novotny and Wilson 1997	Dem et al 2013 Novotny and Wilson 1997	Müller 1962	Müller 1962
Hemiptera_Derbidae	Hemiptera	Derbidae	Candidatus Sulcia muelleri		yes	cosegragation	yes	gen	sp38			fungi	phloem	intra	Prokaryota		yes	no	no			Dem et al 2013 Novotny and Wilson 1997	Dem et al 2013 Novotny and Wilson 1997	Müller 1962	Müller 1962
Hemiptera_Derbidae	Hemiptera	Derbidae	Candidatus Vidania fulgoroideae	Candidatus_Vidania_fulgoroideae_of_Derbidae	yes	cosegragation	yes	gen	sp37			fungi	phloem	intra	Prokaryota		yes	yes	no			Dem et al 2013 Novotny and Wilson 1997	Dem et al 2013 Novotny and Wilson 1997	Müller 1962	Müller 1962
Hemiptera_Derbidae	Hemiptera	Derbidae	Candidatus Vidania fulgoroideae	Candidatus_Vidania_fulgoroideae_of_Derbidae	yes	cosegragation	yes	gen	sp38			fungi	phloem	intra	Prokaryota		yes	yes	no			Dem et al 2013 Novotny and Wilson 1997	Dem et al 2013 Novotny and Wilson 1997	Müller 1962	Müller 1962
Hemiptera_Derbidae	Hemiptera	Derbidae	Candidatus Vidania fulgoroideae	Candidatus_Vidania_fulgoroideae_of_Derbidae	yes	cosegragation	yes	gen	sp39			fungi	phloem	intra	Prokaryota		yes	yes	no			Dem et al 2013 Novotny and Wilson 1997	Dem et al 2013 Novotny and Wilson 1997	Müller 1962	Müller 1962
Hemiptera_Derbidae	Hemiptera	Derbidae	Candidatus Vidania fulgoroideae	Candidatus_Vidania_fulgoroideae_of_Derbidae	yes	cosegragation	yes	gen	sp40			fungi	phloem	intra	Prokaryota		yes	yes	no			Dem et al 2013 Novotny and Wilson 1997	Dem et al 2013 Novotny and Wilson 1997	Müller 1962	Müller 1962
Hemiptera_Derbidae	Hemiptera	Derbidae	Candidatus Vidania fulgoroideae	Candidatus_Vidania_fulgoroideae_of_Derbidae	yes	cosegragation	yes	gen	sp41			fungi	phloem	intra	Prokaryota		yes	yes	no			Dem et al 2013 Novotny and Wilson 1997	Dem et al 2013 Novotny and Wilson 1997	Müller 1962	Müller 1962
Hemiptera_Derbidae	Hemiptera	Derbidae	Candidatus Vidania fulgoroideae	Candidatus_Vidania_fulgoroideae_of_Derbidae	yes	cosegragation	yes	gen	sp42			fungi	phloem	intra	Prokaryota		yes	yes	no			Dem et al 2013 Novotny and Wilson 1997	Dem et al 2013 Novotny and Wilson 1997	Müller 1962	Müller 1962
Hemiptera_Derbidae	Hemiptera	Derbidae	Candidatus Vidania fulgoroideae	Candidatus_Vidania_fulgoroideae_of_Derbidae	yes	cosegragation	yes	gen	sp43			fungi	phloem	intra	Prokaryota		yes	yes	no			Dem et al 2013 Novotny and Wilson 1997	Dem et al 2013 Novotny and Wilson 1997	Müller 1962	Müller 1962
Hemiptera_Derbidae	Hemiptera	Derbidae	Candidatus Vidania fulgoroideae	Candidatus_Vidania_fulgoroideae_of_Derbidae	yes	cosegragation	yes	gen	sp44			fungi	phloem	intra	Prokaryota		yes	yes	no			Dem et al 2013 Novotny and Wilson 1997	Dem et al 2013 Novotny and Wilson 1997	Müller 1962	Müller 1962
Hemiptera_Derbidae	Hemiptera	Derbidae	Candidatus Vidania fulgoroideae	Candidatus_Vidania_fulgoroideae_of_Derbidae	yes	cosegragation	yes	gen	sp45			fungi	phloem	intra	Prokaryota		yes	yes	no			Dem et al 2013 Novotny and Wilson 1997	Dem et al 2013 Novotny and Wilson 1997	Müller 1962	Müller 1962
Hemiptera_Derbidae	Hemiptera	Derbidae	Candidatus Vidania fulgoroideae	Candidatus_Vidania_fulgoroideae_of_Derbidae	yes	cosegragation	yes	gen	sp46			fungi	phloem	intra	Prokaryota		yes	yes	no			Dem et al 2013 Novotny and Wilson 1997	Dem et al 2013 Novotny and Wilson 1997	Müller 1962	Müller 1962
Hemiptera_Derbidae	Hemiptera	Derbidae	Candidatus Vidania fulgoroideae	Candidatus_Vidania_fulgoroideae_of_Derbidae	yes	cosegragation	yes	gen	sp47			fungi	phloem	intra	Prokaryota		yes	yes	no			Dem et al 2013 Novotny and Wilson 1997	Dem et al 2013 Novotny and Wilson 1997	Müller 1962	Müller 1962
Hemiptera_Derbidae	Hemiptera	Derbidae	Candidatus Vidania fulgoroideae	Candidatus_Vidania_fulgoroideae_of_Derbidae	yes	cosegragation	yes	gen	sp48			fungi	phloem	intra	Prokaryota		yes	yes	no			Dem et al 2013 Novotny and Wilson 1997	Dem et al 2013 Novotny and Wilson 1997	Müller 1962	Müller 1962
Hemiptera_Derbidae	Hemiptera	Derbidae	Candidatus Vidania fulgoroideae	Candidatus_Vidania_fulgoroideae_of_Derbidae	yes	cosegragation	yes	gen	sp49			fungi	phloem	intra	Prokaryota		yes	yes	no			Dem et al 2013 Novotny and Wilson 1997	Dem et al 2013 Novotny and Wilson 1997	Müller 1962	Müller 1962
Hemiptera_Derbidae	Hemiptera	Derbidae	Candidatus Vidania fulgoroideae	Candidatus_Vidania_fulgoroideae_of_Derbidae	yes	cosegragation	yes	gen	sp50			fungi	phloem	intra	Prokaryota		yes	yes	no			Dem et al 2013 Novotny and Wilson 1997	Dem et al 2013 Novotny and Wilson 1997	Müller 1962	Müller 1962
Hemiptera_Derbidae	Hemiptera	Derbidae	Candidatus Vidania fulgoroideae	Candidatus_Vidania_fulgoroideae_of_Derbidae	yes	cosegragation	yes	gen	sp51			fungi	phloem	intra	Prokaryota		yes	yes	no			Dem et al 2013 Novotny and Wilson 1997	Dem et al 2013 Novotny and Wilson 1997	Müller 1962	Müller 1962
Hemiptera_Derbidae	Hemiptera	Derbidae	Candidatus Vidania fulgoroideae	Candidatus_Vidania_fulgoroideae_of_Derbidae	yes	cosegragation	yes	gen	sp52			fungi	phloem	intra	Prokaryota		yes	yes	no			Dem et al 2013 Novotny and Wilson 1997	Dem et al 2013 Novotny and Wilson 1997	Müller 1962	Müller 1962
Hemiptera_Derbidae	Hemiptera	Derbidae	F-symbiont		yes		yes	gen	sp39			fungi	phloem	intra	Prokaryota		yes	no	no			Dem et al 2013 Novotny and Wilson 1997	Dem et al 2013 Novotny and Wilson 1997	Müller 1962	Müller 1962
Hemiptera_Derbidae	Hemiptera	Derbidae	F-symbiont		yes		yes	gen	sp40			fungi	phloem	intra	Prokaryota		yes	no	no			Dem et al 2013 Novotny and Wilson 1997	Dem et al 2013 Novotny and Wilson 1997	Müller 1962	Müller 1962
Hemiptera_Derbidae	Hemiptera	Derbidae	F-symbiont		yes		yes	gen	sp41			fungi	phloem	intra	Prokaryota		yes	no	no			Dem et al 2013 Novotny and Wilson 1997	Dem et al 2013 Novotny and Wilson 1997	Müller 1962	Müller 1962
Hemiptera_Derbidae	Hemiptera	Derbidae	F-symbiont		yes		yes	gen	sp42			fungi	phloem	intra	Prokaryota		yes	no	no			Dem et al 2013 Novotny and Wilson 1997	Dem et al 2013 Novotny and Wilson 1997	Müller 1962	Müller 1962
Hemiptera_Derbidae	Hemiptera	Derbidae	G-symbiont		yes		yes	gen	sp38			fungi	phloem	intra	Prokaryota		yes	no	no			Dem et al 2013 Novotny and Wilson 1997	Dem et al 2013 Novotny and Wilson 1997	Müller 1962	Müller 1962
Hemiptera_Derbidae	Hemiptera	Derbidae	H-symbiont														no	no	no					Müller 1962
Hemiptera_Diaspididae	Hemiptera	Diaspididae	Candidatus Uzinura diaspidicola	Candidatus_Uzinura_diaspidicola_of_Diaspididae	yes	cosegragation	yes	Gymnaspis	aechmeae			phloem/leaves (parenchyma)	phloem/leaves (parenchyma)	intra	Prokaryota		yes	no	yes			McClure 1990	McClure 1990	Gruwell et al 2007	Buchner 1965
Hemiptera_Diaspididae	Hemiptera	Diaspididae	Candidatus Uzinura diaspidicola	Candidatus_Uzinura_diaspidicola_of_Diaspididae	yes	cosegragation	yes	Chrysomphalus	aonidum	leaves (parenchyma)	leaves (parenchyma)	phloem/leaves (parenchyma)	phloem/leaves (parenchyma)	intra	Prokaryota		yes	no	yes	Hlavjenková and Sefrová 2012	Hlavjenková and Sefrová 2012	McClure 1990	McClure 1990	Gruwell et al 2007	Buchner 1965
Hemiptera_Diaspididae	Hemiptera	Diaspididae	Candidatus Uzinura diaspidicola	Candidatus_Uzinura_diaspidicola_of_Diaspididae	yes	cosegragation	yes	Pinnaspis	aspidistrae			phloem/leaves (parenchyma)	phloem/leaves (parenchyma)	intra	Prokaryota		yes	no	yes			McClure 1990	McClure 1990	Gruwell et al 2007	Buchner 1965
Hemiptera_Diaspididae	Hemiptera	Diaspididae	Candidatus Uzinura diaspidicola	Candidatus_Uzinura_diaspidicola_of_Diaspididae	yes	cosegragation	yes	Haliaspis	asymmetrica			phloem/leaves (parenchyma)	phloem/leaves (parenchyma)	intra	Prokaryota		yes	no	yes			McClure 1990	McClure 1990	Gruwell et al 2007	Buchner 1965
Hemiptera_Diaspididae	Hemiptera	Diaspididae	Candidatus Uzinura diaspidicola	Candidatus_Uzinura_diaspidicola_of_Diaspididae	yes	cosegragation	yes	Aonidiella	aurantii	phloem	phloem	phloem/leaves (parenchyma)	phloem/leaves (parenchyma)	intra	Prokaryota		yes	no	yes	Kumar and Sharma 2014	Kumar and Sharma 2014	McClure 1990	McClure 1990	Gruwell et al 2007	Buchner 1965
Hemiptera_Diaspididae	Hemiptera	Diaspididae	Candidatus Uzinura diaspidicola	Candidatus_Uzinura_diaspidicola_of_Diaspididae	yes	cosegragation	yes	Lepidosaphes	beckii			phloem/leaves (parenchyma)	phloem/leaves (parenchyma)	intra	Prokaryota		yes	no	yes			McClure 1990	McClure 1990	Gruwell et al 2007	Buchner 1965
Hemiptera_Diaspididae	Hemiptera	Diaspididae	Candidatus Uzinura diaspidicola	Candidatus_Uzinura_diaspidicola_of_Diaspididae	yes	cosegragation	yes	Howardia	biclavis			phloem/leaves (parenchyma)	phloem/leaves (parenchyma)	intra	Prokaryota		yes	no	yes			McClure 1990	McClure 1990	Gruwell et al 2007	Buchner 1965
Hemiptera_Diaspididae	Hemiptera	Diaspididae	Candidatus Uzinura diaspidicola	Candidatus_Uzinura_diaspidicola_of_Diaspididae	yes	cosegragation	yes	Melanaspis	bromiliae			phloem/leaves (parenchyma)	phloem/leaves (parenchyma)	intra	Prokaryota		yes	no	yes			McClure 1990	McClure 1990	Gruwell et al 2007	Buchner 1965
Hemiptera_Diaspididae	Hemiptera	Diaspididae	Candidatus Uzinura diaspidicola	Candidatus_Uzinura_diaspidicola_of_Diaspididae	yes	cosegragation	yes	Pinnaspis	buxi			phloem/leaves (parenchyma)	phloem/leaves (parenchyma)	intra	Prokaryota		yes	no	yes			McClure 1990	McClure 1990	Gruwell et al 2007	Buchner 1965
Hemiptera_Diaspididae	Hemiptera	Diaspididae	Candidatus Uzinura diaspidicola	Candidatus_Uzinura_diaspidicola_of_Diaspididae	yes	cosegragation	yes	Dynaspidiotus	californicus			phloem/leaves (parenchyma)	phloem/leaves (parenchyma)	intra	Prokaryota		yes	no	yes			McClure 1990	McClure 1990	Gruwell et al 2007	Buchner 1965
Hemiptera_Diaspididae	Hemiptera	Diaspididae	Candidatus Uzinura diaspidicola	Candidatus_Uzinura_diaspidicola_of_Diaspididae	yes	cosegragation	yes	Parlatoria	camelliae			phloem/leaves (parenchyma)	phloem/leaves (parenchyma)	intra	Prokaryota		yes	no	yes			McClure 1990	McClure 1990	Gruwell et al 2007	Buchner 1965
Hemiptera_Diaspididae	Hemiptera	Diaspididae	Candidatus Uzinura diaspidicola	Candidatus_Uzinura_diaspidicola_of_Diaspididae	yes	cosegragation	yes	Pseudaulacaspis	cockerelli			phloem/leaves (parenchyma)	phloem/leaves (parenchyma)	intra	Prokaryota		yes	no	yes			McClure 1990	McClure 1990	Gruwell et al 2007	Buchner 1965
Hemiptera_Diaspididae	Hemiptera	Diaspididae	Candidatus Uzinura diaspidicola	Candidatus_Uzinura_diaspidicola_of_Diaspididae	yes	cosegragation	yes	Diaspis	cocois			phloem/leaves (parenchyma)	phloem/leaves (parenchyma)	intra	Prokaryota		yes	no	yes			McClure 1990	McClure 1990	Gruwell et al 2007	Buchner 1965
Hemiptera_Diaspididae	Hemiptera	Diaspididae	Candidatus Uzinura diaspidicola	Candidatus_Uzinura_diaspidicola_of_Diaspididae	yes	cosegragation	yes	Dynaspidiotus	degeneratus			phloem/leaves (parenchyma)	phloem/leaves (parenchyma)	intra	Prokaryota		yes	no	yes			McClure 1990	McClure 1990	Gruwell et al 2007	Buchner 1965
Hemiptera_Diaspididae	Hemiptera	Diaspididae	Candidatus Uzinura diaspidicola	Candidatus_Uzinura_diaspidicola_of_Diaspididae	yes	cosegragation	yes	Aulacaspis	difficilis			phloem/leaves (parenchyma)	phloem/leaves (parenchyma)	intra	Prokaryota		yes	no	yes			McClure 1990	McClure 1990	Gruwell et al 2007	Buchner 1965
Hemiptera_Diaspididae	Hemiptera	Diaspididae	Candidatus Uzinura diaspidicola	Candidatus_Uzinura_diaspidicola_of_Diaspididae	yes	cosegragation	yes	Aulacaspis	distylii			phloem/leaves (parenchyma)	phloem/leaves (parenchyma)	intra	Prokaryota		yes	no	yes			McClure 1990	McClure 1990	Gruwell et al 2007	Buchner 1965
Hemiptera_Diaspididae	Hemiptera	Diaspididae	Candidatus Uzinura diaspidicola	Candidatus_Uzinura_diaspidicola_of_Diaspididae	yes	cosegragation	yes	Diaspis	echinocacti			phloem/leaves (parenchyma)	phloem/leaves (parenchyma)	intra	Prokaryota		yes	no	yes			McClure 1990	McClure 1990	Gruwell et al 2007	Buchner 1965
Hemiptera_Diaspididae	Hemiptera	Diaspididae	Candidatus Uzinura diaspidicola	Candidatus_Uzinura_diaspidicola_of_Diaspididae	yes	cosegragation	yes	Chionaspis	ethelae			phloem/leaves (parenchyma)	phloem/leaves (parenchyma)	intra	Prokaryota		yes	no	yes			McClure 1990	McClure 1990	Gruwell et al 2007	Buchner 1965
Hemiptera_Diaspididae	Hemiptera	Diaspididae	Candidatus Uzinura diaspidicola	Candidatus_Uzinura_diaspidicola_of_Diaspididae	yes	cosegragation	yes	Chionaspis	etrusca			phloem/leaves (parenchyma)	phloem/leaves (parenchyma)	intra	Prokaryota		yes	no	yes			McClure 1990	McClure 1990	Gruwell et al 2007	Buchner 1965
Hemiptera_Diaspididae	Hemiptera	Diaspididae	Candidatus Uzinura diaspidicola	Candidatus_Uzinura_diaspidicola_of_Diaspididae	yes	cosegragation	yes	Unaspis	euonymi	leaves (parenchyma)	leaves (parenchyma)	phloem/leaves (parenchyma)	phloem/leaves (parenchyma)	intra	Prokaryota		yes	no	yes	Sadof and Neal 1993 Peeters et al 2001	Sadof and Neal 1993 Peeters et al 2001	McClure 1990	McClure 1990	Gruwell et al 2007	Buchner 1965
Hemiptera_Diaspididae	Hemiptera	Diaspididae	Candidatus Uzinura diaspidicola	Candidatus_Uzinura_diaspidicola_of_Diaspididae	yes	cosegragation	yes	Fiorinia	euryae			phloem/leaves (parenchyma)	phloem/leaves (parenchyma)	intra	Prokaryota		yes	no	yes			McClure 1990	McClure 1990	Gruwell et al 2007	Buchner 1965
Hemiptera_Diaspididae	Hemiptera	Diaspididae	Candidatus Uzinura diaspidicola	Candidatus_Uzinura_diaspidicola_of_Diaspididae	yes	cosegragation	yes	Fiorinia	externa			phloem/leaves (parenchyma)	phloem/leaves (parenchyma)	intra	Prokaryota		yes	no	yes			McClure 1990	McClure 1990	Gruwell et al 2007	Buchner 1965
Hemiptera_Diaspididae	Hemiptera	Diaspididae	Candidatus Uzinura diaspidicola	Candidatus_Uzinura_diaspidicola_of_Diaspididae	yes	cosegragation	yes	Ichthyaspis	ficicola			phloem/leaves (parenchyma)	phloem/leaves (parenchyma)	intra	Prokaryota		yes	no	yes			McClure 1990	McClure 1990	Gruwell et al 2007	Buchner 1965
Hemiptera_Diaspididae	Hemiptera	Diaspididae	Candidatus Uzinura diaspidicola	Candidatus_Uzinura_diaspidicola_of_Diaspididae	yes	cosegragation	yes	Diaspidiotus	gigas			phloem/leaves (parenchyma)	phloem/leaves (parenchyma)	intra	Prokaryota		yes	no	yes			McClure 1990	McClure 1990	Gruwell et al 2007	Buchner 1965
Hemiptera_Diaspididae	Hemiptera	Diaspididae	Candidatus Uzinura diaspidicola	Candidatus_Uzinura_diaspidicola_of_Diaspididae	yes	cosegragation	yes	Maskellia	globosa			phloem/leaves (parenchyma)	phloem/leaves (parenchyma)	intra	Prokaryota		yes	no	yes			McClure 1990	McClure 1990	Gruwell et al 2007	Buchner 1965
Hemiptera_Diaspididae	Hemiptera	Diaspididae	Candidatus Uzinura diaspidicola	Candidatus_Uzinura_diaspidicola_of_Diaspididae	yes	cosegragation	yes	Lepidosaphes	gloverii			phloem/leaves (parenchyma)	phloem/leaves (parenchyma)	intra	Prokaryota		yes	no	yes			McClure 1990	McClure 1990	Gruwell et al 2007	Buchner 1965
Hemiptera_Diaspididae	Hemiptera	Diaspididae	Candidatus Uzinura diaspidicola	Candidatus_Uzinura_diaspidicola_of_Diaspididae	yes	cosegragation	yes	Pinnaspis	hibisci			phloem/leaves (parenchyma)	phloem/leaves (parenchyma)	intra	Prokaryota		yes	no	yes			McClure 1990	McClure 1990	Gruwell et al 2007	Buchner 1965
Hemiptera_Diaspididae	Hemiptera	Diaspididae	Candidatus Uzinura diaspidicola	Candidatus_Uzinura_diaspidicola_of_Diaspididae	yes	cosegragation	yes	Carulaspis	juniperi			phloem/leaves (parenchyma)	phloem/leaves (parenchyma)	intra	Prokaryota		yes	no	yes			McClure 1990	McClure 1990	Gruwell et al 2007	Buchner 1965
Hemiptera_Diaspididae	Hemiptera	Diaspididae	Candidatus Uzinura diaspidicola	Candidatus_Uzinura_diaspidicola_of_Diaspididae	yes	cosegragation	yes	Protargionia	larreae			phloem/leaves (parenchyma)	phloem/leaves (parenchyma)	intra	Prokaryota		yes	no	yes			McClure 1990	McClure 1990	Gruwell et al 2007	Buchner 1965
Hemiptera_Diaspididae	Hemiptera	Diaspididae	Candidatus Uzinura diaspidicola	Candidatus_Uzinura_diaspidicola_of_Diaspididae	yes	cosegragation	yes	Hemiberlesia	lataniae			phloem/leaves (parenchyma)	phloem/leaves (parenchyma)	intra	Prokaryota		yes	no	yes			McClure 1990	McClure 1990	Gruwell et al 2007	Buchner 1965
Hemiptera_Diaspididae	Hemiptera	Diaspididae	Candidatus Uzinura diaspidicola	Candidatus_Uzinura_diaspidicola_of_Diaspididae	yes	cosegragation	yes	Epidiaspis	leperii			phloem/leaves (parenchyma)	phloem/leaves (parenchyma)	intra	Prokaryota		yes	no	yes			McClure 1990	McClure 1990	Gruwell et al 2007	Buchner 1965
Hemiptera_Diaspididae	Hemiptera	Diaspididae	Candidatus Uzinura diaspidicola	Candidatus_Uzinura_diaspidicola_of_Diaspididae	yes	cosegragation	yes	Chionaspis	lepineyi			phloem/leaves (parenchyma)	phloem/leaves (parenchyma)	intra	Prokaryota		yes	no	yes			McClure 1990	McClure 1990	Gruwell et al 2007	Buchner 1965
Hemiptera_Diaspididae	Hemiptera	Diaspididae	Candidatus Uzinura diaspidicola	Candidatus_Uzinura_diaspidicola_of_Diaspididae	yes	cosegragation	yes	Ischnaspis	longirostris			phloem/leaves (parenchyma)	phloem/leaves (parenchyma)	intra	Prokaryota		yes	no	yes			McClure 1990	McClure 1990	Gruwell et al 2007	Buchner 1965
Hemiptera_Diaspididae	Hemiptera	Diaspididae	Candidatus Uzinura diaspidicola	Candidatus_Uzinura_diaspidicola_of_Diaspididae	yes	cosegragation	yes	Diaspis	manzanitae			phloem/leaves (parenchyma)	phloem/leaves (parenchyma)	intra	Prokaryota		yes	no	yes			McClure 1990	McClure 1990	Gruwell et al 2007	Buchner 1965
Hemiptera_Diaspididae	Hemiptera	Diaspididae	Candidatus Uzinura diaspidicola	Candidatus_Uzinura_diaspidicola_of_Diaspididae	yes	cosegragation	yes	Octaspidiotus	multipori			phloem/leaves (parenchyma)	phloem/leaves (parenchyma)	intra	Prokaryota		yes	no	yes			McClure 1990	McClure 1990	Gruwell et al 2007	Buchner 1965
Hemiptera_Diaspididae	Hemiptera	Diaspididae	Candidatus Uzinura diaspidicola	Candidatus_Uzinura_diaspidicola_of_Diaspididae	yes	cosegragation	yes	Aspidiotus	nerii			phloem/leaves (parenchyma)	phloem/leaves (parenchyma)	intra	Prokaryota		yes	no	yes			McClure 1990	McClure 1990	Gruwell et al 2007	Buchner 1965
Hemiptera_Diaspididae	Hemiptera	Diaspididae	Candidatus Uzinura diaspidicola	Candidatus_Uzinura_diaspidicola_of_Diaspididae	yes	cosegragation	yes	Duplachionaspis	noaeae			phloem/leaves (parenchyma)	phloem/leaves (parenchyma)	intra	Prokaryota		yes	no	yes			McClure 1990	McClure 1990	Gruwell et al 2007	Buchner 1965
Hemiptera_Diaspididae	Hemiptera	Diaspididae	Candidatus Uzinura diaspidicola	Candidatus_Uzinura_diaspidicola_of_Diaspididae	yes	cosegragation	yes	Leucaspis	ohakunensis			phloem/leaves (parenchyma)	phloem/leaves (parenchyma)	intra	Prokaryota		yes	no	yes			McClure 1990	McClure 1990	Gruwell et al 2007	Buchner 1965
Hemiptera_Diaspididae	Hemiptera	Diaspididae	Candidatus Uzinura diaspidicola	Candidatus_Uzinura_diaspidicola_of_Diaspididae	yes	cosegragation	yes	Hemiberlesia	palmae			phloem/leaves (parenchyma)	phloem/leaves (parenchyma)	intra	Prokaryota		yes	no	yes			McClure 1990	McClure 1990	Gruwell et al 2007	Buchner 1965
Hemiptera_Diaspididae	Hemiptera	Diaspididae	Candidatus Uzinura diaspidicola	Candidatus_Uzinura_diaspidicola_of_Diaspididae	yes	cosegragation	yes	Pseudaulacaspis	pentagona			phloem/leaves (parenchyma)	phloem/leaves (parenchyma)	intra	Prokaryota		yes	no	yes			McClure 1990	McClure 1990	Gruwell et al 2007	Buchner 1965
Hemiptera_Diaspididae	Hemiptera	Diaspididae	Candidatus Uzinura diaspidicola	Candidatus_Uzinura_diaspidicola_of_Diaspididae	yes	cosegragation	yes	Parlatoria	pergandii			phloem/leaves (parenchyma)	phloem/leaves (parenchyma)	intra	Prokaryota		yes	no	yes			McClure 1990	McClure 1990	Gruwell et al 2007	Buchner 1965
Hemiptera_Diaspididae	Hemiptera	Diaspididae	Candidatus Uzinura diaspidicola	Candidatus_Uzinura_diaspidicola_of_Diaspididae	yes	cosegragation	yes	Mycetaspis	personata			phloem/leaves (parenchyma)	phloem/leaves (parenchyma)	intra	Prokaryota		yes	no	yes			McClure 1990	McClure 1990	Gruwell et al 2007	Buchner 1965
Hemiptera_Diaspididae	Hemiptera	Diaspididae	Candidatus Uzinura diaspidicola	Candidatus_Uzinura_diaspidicola_of_Diaspididae	yes	cosegragation	yes	Chionaspis	pinifoliae			phloem/leaves (parenchyma)	phloem/leaves (parenchyma)	intra	Prokaryota		yes	no	yes			McClure 1990	McClure 1990	Gruwell et al 2007	Buchner 1965
Hemiptera_Diaspididae	Hemiptera	Diaspididae	Candidatus Uzinura diaspidicola	Candidatus_Uzinura_diaspidicola_of_Diaspididae	yes	cosegragation	yes	Lepidosaphes	pinnaeformis			phloem/leaves (parenchyma)	phloem/leaves (parenchyma)	intra	Prokaryota		yes	no	yes			McClure 1990	McClure 1990	Gruwell et al 2007	Buchner 1965
Hemiptera_Diaspididae	Hemiptera	Diaspididae	Candidatus Uzinura diaspidicola	Candidatus_Uzinura_diaspidicola_of_Diaspididae	yes	cosegragation	yes	Pinnaspis	piperis			phloem/leaves (parenchyma)	phloem/leaves (parenchyma)	intra	Prokaryota		yes	no	yes			McClure 1990	McClure 1990	Gruwell et al 2007	Buchner 1965
Hemiptera_Diaspididae	Hemiptera	Diaspididae	Candidatus Uzinura diaspidicola	Candidatus_Uzinura_diaspidicola_of_Diaspididae	yes	cosegragation	yes	Pseudaulacaspis	prunicola			phloem/leaves (parenchyma)	phloem/leaves (parenchyma)	intra	Prokaryota		yes	no	yes			McClure 1990	McClure 1990	Gruwell et al 2007	Buchner 1965
Hemiptera_Diaspididae	Hemiptera	Diaspididae	Candidatus Uzinura diaspidicola	Candidatus_Uzinura_diaspidicola_of_Diaspididae	yes	cosegragation	yes	Parlatoria	pseudaspidiotus			phloem/leaves (parenchyma)	phloem/leaves (parenchyma)	intra	Prokaryota		yes	no	yes			McClure 1990	McClure 1990	Gruwell et al 2007	Buchner 1965
Hemiptera_Diaspididae	Hemiptera	Diaspididae	Candidatus Uzinura diaspidicola	Candidatus_Uzinura_diaspidicola_of_Diaspididae	yes	cosegragation	yes	Eulepidosaphes	pyriformis			phloem/leaves (parenchyma)	phloem/leaves (parenchyma)	intra	Prokaryota		yes	no	yes			McClure 1990	McClure 1990	Gruwell et al 2007	Buchner 1965
Hemiptera_Diaspididae	Hemiptera	Diaspididae	Candidatus Uzinura diaspidicola	Candidatus_Uzinura_diaspidicola_of_Diaspididae	yes	cosegragation	yes	Quernaspis	quercus			phloem/leaves (parenchyma)	phloem/leaves (parenchyma)	intra	Prokaryota		yes	no	yes			McClure 1990	McClure 1990	Gruwell et al 2007	Buchner 1965
Hemiptera_Diaspididae	Hemiptera	Diaspididae	Candidatus Uzinura diaspidicola	Candidatus_Uzinura_diaspidicola_of_Diaspididae	yes	cosegragation	yes	Palinaspis	quohogiformis			phloem/leaves (parenchyma)	phloem/leaves (parenchyma)	intra	Prokaryota		yes	no	yes			McClure 1990	McClure 1990	Gruwell et al 2007	Buchner 1965
Hemiptera_Diaspididae	Hemiptera	Diaspididae	Candidatus Uzinura diaspidicola	Candidatus_Uzinura_diaspidicola_of_Diaspididae	yes	cosegragation	yes	Aspidiella	sacchari			phloem/leaves (parenchyma)	phloem/leaves (parenchyma)	intra	Prokaryota		yes	no	yes			McClure 1990	McClure 1990	Gruwell et al 2007	Buchner 1965
Hemiptera_Diaspididae	Hemiptera	Diaspididae	Candidatus Uzinura diaspidicola	Candidatus_Uzinura_diaspidicola_of_Diaspididae	yes	cosegragation	yes	Unachionaspis	signata			phloem/leaves (parenchyma)	phloem/leaves (parenchyma)	intra	Prokaryota		yes	no	yes			McClure 1990	McClure 1990	Gruwell et al 2007	Buchner 1965
Hemiptera_Diaspididae	Hemiptera	Diaspididae	Candidatus Uzinura diaspidicola	Candidatus_Uzinura_diaspidicola_of_Diaspididae	yes	cosegragation	yes	Dactylaspis	sp			phloem/leaves (parenchyma)	phloem/leaves (parenchyma)	intra	Prokaryota		yes	no	yes			McClure 1990	McClure 1990	Gruwell et al 2007	Buchner 1965
Hemiptera_Diaspididae	Hemiptera	Diaspididae	Candidatus Uzinura diaspidicola	Candidatus_Uzinura_diaspidicola_of_Diaspididae	yes	cosegragation	yes	Melanaspis	sp			phloem/leaves (parenchyma)	phloem/leaves (parenchyma)	intra	Prokaryota		yes	no	yes			McClure 1990	McClure 1990	Gruwell et al 2007	Buchner 1965
Hemiptera_Diaspididae	Hemiptera	Diaspididae	Candidatus Uzinura diaspidicola	Candidatus_Uzinura_diaspidicola_of_Diaspididae	yes	cosegragation	yes	Pinnaspis	sp			phloem/leaves (parenchyma)	phloem/leaves (parenchyma)	intra	Prokaryota		yes	no	yes			McClure 1990	McClure 1990	Gruwell et al 2007	Buchner 1965
Hemiptera_Diaspididae	Hemiptera	Diaspididae	Candidatus Uzinura diaspidicola	Candidatus_Uzinura_diaspidicola_of_Diaspididae	yes	cosegragation	yes	Prodigiaspis	sp			phloem/leaves (parenchyma)	phloem/leaves (parenchyma)	intra	Prokaryota		yes	no	yes			McClure 1990	McClure 1990	Gruwell et al 2007	Buchner 1965
Hemiptera_Diaspididae	Hemiptera	Diaspididae	Candidatus Uzinura diaspidicola	Candidatus_Uzinura_diaspidicola_of_Diaspididae	yes	cosegragation	yes	Kuwanaspis	takahashii			phloem/leaves (parenchyma)	phloem/leaves (parenchyma)	intra	Prokaryota		yes	no	yes			McClure 1990	McClure 1990	Gruwell et al 2007	Buchner 1965
Hemiptera_Diaspididae	Hemiptera	Diaspididae	Candidatus Uzinura diaspidicola	Candidatus_Uzinura_diaspidicola_of_Diaspididae	yes	cosegragation	yes	Fiorinia	theae			phloem/leaves (parenchyma)	phloem/leaves (parenchyma)	intra	Prokaryota		yes	no	yes			McClure 1990	McClure 1990	Gruwell et al 2007	Buchner 1965
Hemiptera_Diaspididae	Hemiptera	Diaspididae	Candidatus Uzinura diaspidicola	Candidatus_Uzinura_diaspidicola_of_Diaspididae	yes	cosegragation	yes	Parlatoria	theae			phloem/leaves (parenchyma)	phloem/leaves (parenchyma)	intra	Prokaryota		yes	no	yes			McClure 1990	McClure 1990	Gruwell et al 2007	Buchner 1965
Hemiptera_Diaspididae	Hemiptera	Diaspididae	Candidatus Uzinura diaspidicola	Candidatus_Uzinura_diaspidicola_of_Diaspididae	yes	cosegragation	yes	Pseudaonidia	trilobitiformis			phloem/leaves (parenchyma)	phloem/leaves (parenchyma)	intra	Prokaryota		yes	no	yes			McClure 1990	McClure 1990	Gruwell et al 2007	Buchner 1965
Hemiptera_Diaspididae	Hemiptera	Diaspididae	Candidatus Uzinura diaspidicola	Candidatus_Uzinura_diaspidicola_of_Diaspididae	yes	cosegragation	yes	Chionaspis	wistariae			phloem/leaves (parenchyma)	phloem/leaves (parenchyma)	intra	Prokaryota		yes	no	yes			McClure 1990	McClure 1990	Gruwell et al 2007	Buchner 1965
Hemiptera_Diaspididae	Hemiptera	Diaspididae	Candidatus Uzinura diaspidicola	Candidatus_Uzinura_diaspidicola_of_Diaspididae	yes	cosegragation	yes	Aulacaspis	yasumatsui			phloem/leaves (parenchyma)	phloem/leaves (parenchyma)	intra	Prokaryota		yes	no	yes			McClure 1990	McClure 1990	Gruwell et al 2007	Buchner 1965
Hemiptera_Diaspididae	Hemiptera	Diaspididae	Candidatus Uzinura diaspidicola	Candidatus_Uzinura_diaspidicola_of_Diaspididae	yes	cosegragation	yes	Furchadiaspis	zamiae			phloem/leaves (parenchyma)	phloem/leaves (parenchyma)	intra	Prokaryota		yes	no	yes			McClure 1990	McClure 1990	Gruwell et al 2007	Buchner 1965
Hemiptera_Dictyopharidae	Hemiptera	Dictyopharidae	Candidatus Sulcia muelleri	Candidatus_Sulcia_muelleri_of_Dictyopharidae	yes	cosegragation	yes	gen	sp1			phloem	phloem	intra	Prokaryota		yes	no	no			Denno and Perfect 1994 Novotny and Wilson 1997	Denno and Perfect 1994 Novotny and Wilson 1997	Müller 1962	Müller 1962
Hemiptera_Dictyopharidae	Hemiptera	Dictyopharidae	Candidatus Sulcia muelleri	Candidatus_Sulcia_muelleri_of_Dictyopharidae	yes	cosegragation	yes	gen	sp2			phloem	phloem	intra	Prokaryota		yes	no	no			Denno and Perfect 1994 Novotny and Wilson 1997	Denno and Perfect 1994 Novotny and Wilson 1997	Müller 1962	Müller 1962
Hemiptera_Dictyopharidae	Hemiptera	Dictyopharidae	Candidatus Sulcia muelleri	Candidatus_Sulcia_muelleri_of_Dictyopharidae	yes	cosegragation	yes	gen	sp3			phloem	phloem	intra	Prokaryota		yes	no	no			Denno and Perfect 1994 Novotny and Wilson 1997	Denno and Perfect 1994 Novotny and Wilson 1997	Müller 1962	Müller 1962
Hemiptera_Dictyopharidae	Hemiptera	Dictyopharidae	Candidatus Sulcia muelleri	Candidatus_Sulcia_muelleri_of_Dictyopharidae	yes	cosegragation	yes	gen	sp4			phloem	phloem	intra	Prokaryota		yes	no	no			Denno and Perfect 1994 Novotny and Wilson 1997	Denno and Perfect 1994 Novotny and Wilson 1997	Müller 1962	Müller 1962
Hemiptera_Dictyopharidae	Hemiptera	Dictyopharidae	Candidatus Sulcia muelleri	Candidatus_Sulcia_muelleri_of_Dictyopharidae	yes	cosegragation	yes	gen	sp5			phloem	phloem	intra	Prokaryota		yes	no	no			Denno and Perfect 1994 Novotny and Wilson 1997	Denno and Perfect 1994 Novotny and Wilson 1997	Müller 1962	Müller 1962
Hemiptera_Dictyopharidae	Hemiptera	Dictyopharidae	Candidatus Sulcia muelleri	Candidatus_Sulcia_muelleri_of_Dictyopharidae	yes	cosegragation	yes	gen	sp6			phloem	phloem	intra	Prokaryota		yes	no	no			Denno and Perfect 1994 Novotny and Wilson 1997	Denno and Perfect 1994 Novotny and Wilson 1997	Müller 1962	Müller 1962
Hemiptera_Dictyopharidae	Hemiptera	Dictyopharidae	Candidatus Sulcia muelleri	Candidatus_Sulcia_muelleri_of_Dictyopharidae	yes	cosegragation	yes	gen	sp7			phloem	phloem	intra	Prokaryota		yes	no	no			Denno and Perfect 1994 Novotny and Wilson 1997	Denno and Perfect 1994 Novotny and Wilson 1997	Müller 1962	Müller 1962
Hemiptera_Dictyopharidae	Hemiptera	Dictyopharidae	Candidatus Sulcia muelleri	Candidatus_Sulcia_muelleri_of_Dictyopharidae	yes	cosegragation	yes	Scolops	sulcipes			phloem	phloem	intra	Prokaryota		yes	no	no			Denno and Perfect 1994 Novotny and Wilson 1997	Denno and Perfect 1994 Novotny and Wilson 1997	Urban and Cryan 2012
Hemiptera_Dictyopharidae	Hemiptera	Dictyopharidae	Candidatus Vidania fulgoroideae	Candidatus_Vidania_fulgoroideae_of_Dictyopharidae	yes	cosegragation	yes	gen	sp1			phloem	phloem	intra	Prokaryota		yes	no	no			Denno and Perfect 1994 Novotny and Wilson 1997	Denno and Perfect 1994 Novotny and Wilson 1997	Müller 1962	Müller 1962
Hemiptera_Dictyopharidae	Hemiptera	Dictyopharidae	Candidatus Vidania fulgoroideae	Candidatus_Vidania_fulgoroideae_of_Dictyopharidae	yes	cosegragation	yes	gen	sp2			phloem	phloem	intra	Prokaryota		yes	no	no			Denno and Perfect 1994 Novotny and Wilson 1997	Denno and Perfect 1994 Novotny and Wilson 1997	Müller 1962	Müller 1962
Hemiptera_Dictyopharidae	Hemiptera	Dictyopharidae	Candidatus Vidania fulgoroideae	Candidatus_Vidania_fulgoroideae_of_Dictyopharidae	yes	cosegragation	yes	gen	sp3			phloem	phloem	intra	Prokaryota		yes	no	no			Denno and Perfect 1994 Novotny and Wilson 1997	Denno and Perfect 1994 Novotny and Wilson 1997	Müller 1962	Müller 1962
Hemiptera_Dictyopharidae	Hemiptera	Dictyopharidae	Candidatus Vidania fulgoroideae	Candidatus_Vidania_fulgoroideae_of_Dictyopharidae	yes	cosegragation	yes	gen	sp4			phloem	phloem	intra	Prokaryota		yes	no	no			Denno and Perfect 1994 Novotny and Wilson 1997	Denno and Perfect 1994 Novotny and Wilson 1997	Müller 1962	Müller 1962
Hemiptera_Dictyopharidae	Hemiptera	Dictyopharidae	Candidatus Vidania fulgoroideae	Candidatus_Vidania_fulgoroideae_of_Dictyopharidae	yes	cosegragation	yes	gen	sp5			phloem	phloem	intra	Prokaryota		yes	no	no			Denno and Perfect 1994 Novotny and Wilson 1997	Denno and Perfect 1994 Novotny and Wilson 1997	Müller 1962	Müller 1962
Hemiptera_Dictyopharidae	Hemiptera	Dictyopharidae	Candidatus Vidania fulgoroideae	Candidatus_Vidania_fulgoroideae_of_Dictyopharidae	yes	cosegragation	yes	gen	sp6			phloem	phloem	intra	Prokaryota		yes	no	no			Denno and Perfect 1994 Novotny and Wilson 1997	Denno and Perfect 1994 Novotny and Wilson 1997	Müller 1962	Müller 1962
Hemiptera_Dictyopharidae	Hemiptera	Dictyopharidae	Candidatus Vidania fulgoroideae	Candidatus_Vidania_fulgoroideae_of_Dictyopharidae	yes	cosegragation	yes	gen	sp7			phloem	phloem	intra	Prokaryota		yes	no	no			Denno and Perfect 1994 Novotny and Wilson 1997	Denno and Perfect 1994 Novotny and Wilson 1997	Müller 1962	Müller 1962
Hemiptera_Dictyopharidae	Hemiptera	Dictyopharidae	F-symbiont		yes		yes	gen	sp10			phloem	phloem	intra	Prokaryota		yes	no	no			Denno and Perfect 1994 Novotny and Wilson 1997	Denno and Perfect 1994 Novotny and Wilson 1997	Müller 1962	Müller 1962
Hemiptera_Dictyopharidae	Hemiptera	Dictyopharidae	F-symbiont		yes		yes	gen	sp11			phloem	phloem	intra	Prokaryota		yes	no	no			Denno and Perfect 1994 Novotny and Wilson 1997	Denno and Perfect 1994 Novotny and Wilson 1997	Müller 1962	Müller 1962
Hemiptera_Dictyopharidae	Hemiptera	Dictyopharidae	F-symbiont		yes		yes	gen	sp12			phloem	phloem	intra	Prokaryota		yes	no	no			Denno and Perfect 1994 Novotny and Wilson 1997	Denno and Perfect 1994 Novotny and Wilson 1997	Müller 1962	Müller 1962
Hemiptera_Dictyopharidae	Hemiptera	Dictyopharidae	F-symbiont		yes		yes	gen	sp13			phloem	phloem	intra	Prokaryota		yes	no	no			Denno and Perfect 1994 Novotny and Wilson 1997	Denno and Perfect 1994 Novotny and Wilson 1997	Müller 1962	Müller 1962
Hemiptera_Dictyopharidae	Hemiptera	Dictyopharidae	F-symbiont		yes		yes	gen	sp14			phloem	phloem	intra	Prokaryota		yes	no	no			Denno and Perfect 1994 Novotny and Wilson 1997	Denno and Perfect 1994 Novotny and Wilson 1997	Müller 1962	Müller 1962
Hemiptera_Dictyopharidae	Hemiptera	Dictyopharidae	F-symbiont		yes		yes	gen	sp15			phloem	phloem	intra	Prokaryota		yes	no	no			Denno and Perfect 1994 Novotny and Wilson 1997	Denno and Perfect 1994 Novotny and Wilson 1997	Müller 1962	Müller 1962
Hemiptera_Dictyopharidae	Hemiptera	Dictyopharidae	F-symbiont		yes		yes	gen	sp16			phloem	phloem	intra	Prokaryota		yes	no	no			Denno and Perfect 1994 Novotny and Wilson 1997	Denno and Perfect 1994 Novotny and Wilson 1997	Müller 1962	Müller 1962
Hemiptera_Dictyopharidae	Hemiptera	Dictyopharidae	F-symbiont		yes		yes	gen	sp17			phloem	phloem	intra	Prokaryota		yes	no	no			Denno and Perfect 1994 Novotny and Wilson 1997	Denno and Perfect 1994 Novotny and Wilson 1997	Müller 1962	Müller 1962
Hemiptera_Dictyopharidae	Hemiptera	Dictyopharidae	F-symbiont		yes		yes	gen	sp18			phloem	phloem	intra	Prokaryota		yes	no	no			Denno and Perfect 1994 Novotny and Wilson 1997	Denno and Perfect 1994 Novotny and Wilson 1997	Müller 1962	Müller 1962
Hemiptera_Dictyopharidae	Hemiptera	Dictyopharidae	F-symbiont		yes		yes	gen	sp19			phloem	phloem	intra	Prokaryota		yes	no	no			Denno and Perfect 1994 Novotny and Wilson 1997	Denno and Perfect 1994 Novotny and Wilson 1997	Müller 1962	Müller 1962
Hemiptera_Dictyopharidae	Hemiptera	Dictyopharidae	F-symbiont		yes		yes	gen	sp20			phloem	phloem	intra	Prokaryota		yes	no	no			Denno and Perfect 1994 Novotny and Wilson 1997	Denno and Perfect 1994 Novotny and Wilson 1997	Müller 1962	Müller 1962
Hemiptera_Dictyopharidae	Hemiptera	Dictyopharidae	F-symbiont		yes		yes	gen	sp21			phloem	phloem	intra	Prokaryota		yes	no	no			Denno and Perfect 1994 Novotny and Wilson 1997	Denno and Perfect 1994 Novotny and Wilson 1997	Müller 1962	Müller 1962
Hemiptera_Dictyopharidae	Hemiptera	Dictyopharidae	F-symbiont		yes		yes	gen	sp8			phloem	phloem	intra	Prokaryota		yes	no	no			Denno and Perfect 1994 Novotny and Wilson 1997	Denno and Perfect 1994 Novotny and Wilson 1997	Müller 1962	Müller 1962
Hemiptera_Dictyopharidae	Hemiptera	Dictyopharidae	F-symbiont		yes		yes	gen	sp9			phloem	phloem	intra	Prokaryota		yes	no	no			Denno and Perfect 1994 Novotny and Wilson 1997	Denno and Perfect 1994 Novotny and Wilson 1997	Müller 1962	Müller 1962
Hemiptera_Dictyopharidae	Hemiptera	Dictyopharidae	H-symbiont														no	no	no					Müller 1962
Hemiptera_Dictyopharidae	Hemiptera	Dictyopharidae	M-symbiont		yes		yes	gen	sp2			phloem	phloem	intra	Prokaryota		yes	no	no			Denno and Perfect 1994 Novotny and Wilson 1997	Denno and Perfect 1994 Novotny and Wilson 1997	Müller 1962	Müller 1962
Hemiptera_Dictyopharidae	Hemiptera	Dictyopharidae	M-symbiont		yes		yes	gen	sp21			phloem	phloem	intra	Prokaryota		yes	no	no			Denno and Perfect 1994 Novotny and Wilson 1997	Denno and Perfect 1994 Novotny and Wilson 1997	Müller 1962	Müller 1962
Hemiptera_Dictyopharidae	Hemiptera	Dictyopharidae	M-symbiont		yes		yes	gen	sp3			phloem	phloem	intra	Prokaryota		yes	no	no			Denno and Perfect 1994 Novotny and Wilson 1997	Denno and Perfect 1994 Novotny and Wilson 1997	Müller 1962	Müller 1962
Hemiptera_Dictyopharidae	Hemiptera	Dictyopharidae	M-symbiont		yes		yes	gen	sp4			phloem	phloem	intra	Prokaryota		yes	no	no			Denno and Perfect 1994 Novotny and Wilson 1997	Denno and Perfect 1994 Novotny and Wilson 1997	Müller 1962	Müller 1962
Hemiptera_Dictyopharidae	Hemiptera	Dictyopharidae	M-symbiont		yes		yes	gen	sp5			phloem	phloem	intra	Prokaryota		yes	no	no			Denno and Perfect 1994 Novotny and Wilson 1997	Denno and Perfect 1994 Novotny and Wilson 1997	Müller 1962	Müller 1962
Hemiptera_Dictyopharidae	Hemiptera	Dictyopharidae	M-symbiont		yes		yes	gen	sp6			phloem	phloem	intra	Prokaryota		yes	no	no			Denno and Perfect 1994 Novotny and Wilson 1997	Denno and Perfect 1994 Novotny and Wilson 1997	Müller 1962	Müller 1962
Hemiptera_Dictyopharidae	Hemiptera	Dictyopharidae	M-symbiont		yes		yes	gen	sp7			phloem	phloem	intra	Prokaryota		yes	no	no			Denno and Perfect 1994 Novotny and Wilson 1997	Denno and Perfect 1994 Novotny and Wilson 1997	Müller 1962	Müller 1962
Hemiptera_Dinidoridae	Hemiptera	Dinidoridae	Gammaproteobacteria														no	no	no					Kikuchi et al 2011
Hemiptera_Epipygidae	Hemiptera	Epipygidae	Candidatus Sulcia muelleri	Candidatus_Sulcia_muelleri_of_Epipygidae	yes	cosegragation	yes	Eicissus	sp			xylem	nonfeeding	intra	Prokaryota		yes	no	yes			Cryan and Svenson 2010 Dem et al 2013 (and references therein)	Hamilton 2001	Koga et al 2013A
Hemiptera_Eriococcidae	Hemiptera	Eriococcidae	Bacteria		yes		yes	Greenisca	brachypodii			phloem/leaves (parenchyma)	phloem/leaves (parenchyma)	intra	Prokaryota		yes	no	no			Gullan and Kosztarab 1997 Resh and Cardé 2009	Gullan and Kosztarab 1997 Resh and Cardé 2009	Michalik et al 2016	Michalik et al 2016
Hemiptera_Eriococcidae	Hemiptera	Eriococcidae	Burkholdaria														no	no	no					Michalik et al 2016
Hemiptera_Eriococcidae	Hemiptera	Eriococcidae	Candidatus Uzinura diaspidicola	Symbiont_of_Cryptococcus_ulmi	yes		yes	Cryptococcus	fagisuga			phloem/leaves (parenchyma)	phloem/leaves (parenchyma)	intra	Prokaryota		yes	yes	yes			Gullan and Kosztarab 1997 Resh and Cardé 2009	Gullan and Kosztarab 1997 Resh and Cardé 2009	Andersen et al 2010 Walzcuch 1932 (Buchner 1965)	Walzcuch 1932 (Buchner 1965)
Hemiptera_Eriococcidae	Hemiptera	Eriococcidae	Candidatus Uzinura diaspidicola	Symbiont_of_Cryptococcus_ulmi	yes		yes	Eriococcus	spurius			phloem/leaves (parenchyma)	phloem/leaves (parenchyma)	intra	Prokaryota		yes	yes	yes			Gullan and Kosztarab 1997 Resh and Cardé 2009	Gullan and Kosztarab 1997 Resh and Cardé 2009	Andersen et al 2010 Walzcuch 1932 (Buchner 1965)	Walzcuch 1932 (Buchner 1965)
Hemiptera_Eriococcidae	Hemiptera	Eriococcidae	none known		none known		no	Apiomorpha	minor			phloem/leaves (parenchyma)	phloem/leaves (parenchyma)				yes	no	no			Gullan and Kosztarab 1997 Resh and Cardé 2009	Gullan and Kosztarab 1997 Resh and Cardé 2009	Buchner 1957 (Buchner 1965)	Buchner 1957 (Buchner 1965)
Hemiptera_Eriococcidae	Hemiptera	Eriococcidae	none known		none known		no	Apiomorpha	munita			phloem/leaves (parenchyma)	phloem/leaves (parenchyma)				yes	no	no			Gullan and Kosztarab 1997 Resh and Cardé 2009	Gullan and Kosztarab 1997 Resh and Cardé 2009	Buchner 1957 (Buchner 1965)	Buchner 1957 (Buchner 1965)
Hemiptera_Eriococcidae	Hemiptera	Eriococcidae	none known		none known		no	Apiomorpha	strombylosa			phloem/leaves (parenchyma)	phloem/leaves (parenchyma)				yes	no	no			Gullan and Kosztarab 1997 Resh and Cardé 2009	Gullan and Kosztarab 1997 Resh and Cardé 2009	Buchner 1957 (Buchner 1965)	Buchner 1957 (Buchner 1965)
Hemiptera_Eriococcidae	Hemiptera	Eriococcidae	none known		none known		no	Apiomorpha	urnalis			phloem/leaves (parenchyma)	phloem/leaves (parenchyma)				yes	no	no			Gullan and Kosztarab 1997 Resh and Cardé 2009	Gullan and Kosztarab 1997 Resh and Cardé 2009	Buchner 1957 (Buchner 1965)	Buchner 1957 (Buchner 1965)
Hemiptera_Eurybrachidae	Hemiptera	Eurybrachidae	F-symbiont		yes		yes	gen	sp1			phloem	phloem	intra	Prokaryota		yes	no	no			Denno and Perfect 1994 Novotny and Wilson 1997	Denno and Perfect 1994 Novotny and Wilson 1997	Müller 1962	Müller 1962
Hemiptera_Eurybrachidae	Hemiptera	Eurybrachidae	H-symbiont														no	no	no					Müller 1962
Hemiptera_Flatidae	Hemiptera	Flatidae	Bacteria		yes		yes	Metcalfa	pruinosa			phloem	phloem	intra	Prokaryota		yes	no	no			Denno and Perfect 1994 Novotny and Wilson 1997	Denno and Perfect 1994 Novotny and Wilson 1997	Michalik et al 2009	Michalik et al 2009
Hemiptera_Flatidae	Hemiptera	Flatidae	Candidatus Vidania fulgoroideae	Candidatus_Vidania_fulgoroideae_of_Flatidae	yes	cosegragation	yes	Mistharnophantia	sp			phloem	phloem	intra	Prokaryota		yes	no	no			Denno and Perfect 1994 Novotny and Wilson 1997	Denno and Perfect 1994 Novotny and Wilson 1997	Urban and Cryan 2012
Hemiptera_Flatidae	Hemiptera	Flatidae	F-symbiont		yes		yes	gen	sp1			phloem	phloem	intra	Prokaryota		yes	no	no			Denno and Perfect 1994 Novotny and Wilson 1997	Denno and Perfect 1994 Novotny and Wilson 1997	Müller 1962	Müller 1962
Hemiptera_Flatidae	Hemiptera	Flatidae	F-symbiont		yes		yes	gen	sp2			phloem	phloem	intra	Prokaryota		yes	no	no			Denno and Perfect 1994 Novotny and Wilson 1997	Denno and Perfect 1994 Novotny and Wilson 1997	Müller 1962	Müller 1962
Hemiptera_Flatidae	Hemiptera	Flatidae	F-symbiont		yes		yes	gen	sp3			phloem	phloem	intra	Prokaryota		yes	no	no			Denno and Perfect 1994 Novotny and Wilson 1997	Denno and Perfect 1994 Novotny and Wilson 1997	Müller 1962	Müller 1962
Hemiptera_Flatidae	Hemiptera	Flatidae	F-symbiont		yes		yes	gen	sp4			phloem	phloem	intra	Prokaryota		yes	no	no			Denno and Perfect 1994 Novotny and Wilson 1997	Denno and Perfect 1994 Novotny and Wilson 1997	Müller 1962	Müller 1962
Hemiptera_Flatidae	Hemiptera	Flatidae	F-symbiont		yes		yes	gen	sp5			phloem	phloem	intra	Prokaryota		yes	no	no			Denno and Perfect 1994 Novotny and Wilson 1997	Denno and Perfect 1994 Novotny and Wilson 1997	Müller 1962	Müller 1962
Hemiptera_Flatidae	Hemiptera	Flatidae	F-symbiont		yes		yes	gen	sp6			phloem	phloem	intra	Prokaryota		yes	no	no			Denno and Perfect 1994 Novotny and Wilson 1997	Denno and Perfect 1994 Novotny and Wilson 1997	Müller 1962	Müller 1962
Hemiptera_Flatidae	Hemiptera	Flatidae	F-symbiont		yes		yes	gen	sp7			phloem	phloem	intra	Prokaryota		yes	no	no			Denno and Perfect 1994 Novotny and Wilson 1997	Denno and Perfect 1994 Novotny and Wilson 1997	Müller 1962	Müller 1962
Hemiptera_Flatidae	Hemiptera	Flatidae	Fungi		yes		yes	Metcalfa	pruinosa			phloem	phloem	intra	Eukaryota		yes	no	no			Denno and Perfect 1994 Novotny and Wilson 1997	Denno and Perfect 1994 Novotny and Wilson 1997	Michalik et al 2009	Michalik et al 2009
Hemiptera_Fulgoridae	Hemiptera	Fulgoridae	Candidatus Sulcia muelleri	Candidatus_Sulcia_muelleri_of_Fulgoridae	yes	cosegragation	yes	gen	sp1			phloem	phloem	intra	Prokaryota		yes	no	no			Denno and Perfect 1994 Novotny and Wilson 1997	Denno and Perfect 1994 Novotny and Wilson 1997	Müller 1962	Müller 1962
Hemiptera_Fulgoridae	Hemiptera	Fulgoridae	Candidatus Sulcia muelleri	Candidatus_Sulcia_muelleri_of_Fulgoridae	yes	cosegragation	yes	gen	sp10			phloem	phloem	intra	Prokaryota		yes	no	no			Denno and Perfect 1994 Novotny and Wilson 1997	Denno and Perfect 1994 Novotny and Wilson 1997	Müller 1962	Müller 1962
Hemiptera_Fulgoridae	Hemiptera	Fulgoridae	Candidatus Sulcia muelleri	Candidatus_Sulcia_muelleri_of_Fulgoridae	yes	cosegragation	yes	gen	sp11			phloem	phloem	intra	Prokaryota		yes	no	no			Denno and Perfect 1994 Novotny and Wilson 1997	Denno and Perfect 1994 Novotny and Wilson 1997	Müller 1962	Müller 1962
Hemiptera_Fulgoridae	Hemiptera	Fulgoridae	Candidatus Sulcia muelleri	Candidatus_Sulcia_muelleri_of_Fulgoridae	yes	cosegragation	yes	gen	sp12			phloem	phloem	intra	Prokaryota		yes	no	no			Denno and Perfect 1994 Novotny and Wilson 1997	Denno and Perfect 1994 Novotny and Wilson 1997	Müller 1962	Müller 1962
Hemiptera_Fulgoridae	Hemiptera	Fulgoridae	Candidatus Sulcia muelleri	Candidatus_Sulcia_muelleri_of_Fulgoridae	yes	cosegragation	yes	gen	sp13			phloem	phloem	intra	Prokaryota		yes	no	no			Denno and Perfect 1994 Novotny and Wilson 1997	Denno and Perfect 1994 Novotny and Wilson 1997	Müller 1962	Müller 1962
Hemiptera_Fulgoridae	Hemiptera	Fulgoridae	Candidatus Sulcia muelleri	Candidatus_Sulcia_muelleri_of_Fulgoridae	yes	cosegragation	yes	gen	sp14			phloem	phloem	intra	Prokaryota		yes	no	no			Denno and Perfect 1994 Novotny and Wilson 1997	Denno and Perfect 1994 Novotny and Wilson 1997	Müller 1962	Müller 1962
Hemiptera_Fulgoridae	Hemiptera	Fulgoridae	Candidatus Sulcia muelleri	Candidatus_Sulcia_muelleri_of_Fulgoridae	yes	cosegragation	yes	gen	sp15			phloem	phloem	intra	Prokaryota		yes	no	no			Denno and Perfect 1994 Novotny and Wilson 1997	Denno and Perfect 1994 Novotny and Wilson 1997	Müller 1962	Müller 1962
Hemiptera_Fulgoridae	Hemiptera	Fulgoridae	Candidatus Sulcia muelleri	Candidatus_Sulcia_muelleri_of_Fulgoridae	yes	cosegragation	yes	gen	sp2			phloem	phloem	intra	Prokaryota		yes	no	no			Denno and Perfect 1994 Novotny and Wilson 1997	Denno and Perfect 1994 Novotny and Wilson 1997	Müller 1962	Müller 1962
Hemiptera_Fulgoridae	Hemiptera	Fulgoridae	Candidatus Sulcia muelleri	Candidatus_Sulcia_muelleri_of_Fulgoridae	yes	cosegragation	yes	gen	sp3			phloem	phloem	intra	Prokaryota		yes	no	no			Denno and Perfect 1994 Novotny and Wilson 1997	Denno and Perfect 1994 Novotny and Wilson 1997	Müller 1962	Müller 1962
Hemiptera_Fulgoridae	Hemiptera	Fulgoridae	Candidatus Sulcia muelleri	Candidatus_Sulcia_muelleri_of_Fulgoridae	yes	cosegragation	yes	gen	sp4			phloem	phloem	intra	Prokaryota		yes	no	no			Denno and Perfect 1994 Novotny and Wilson 1997	Denno and Perfect 1994 Novotny and Wilson 1997	Müller 1962	Müller 1962
Hemiptera_Fulgoridae	Hemiptera	Fulgoridae	Candidatus Sulcia muelleri	Candidatus_Sulcia_muelleri_of_Fulgoridae	yes	cosegragation	yes	gen	sp5			phloem	phloem	intra	Prokaryota		yes	no	no			Denno and Perfect 1994 Novotny and Wilson 1997	Denno and Perfect 1994 Novotny and Wilson 1997	Müller 1962	Müller 1962
Hemiptera_Fulgoridae	Hemiptera	Fulgoridae	Candidatus Sulcia muelleri	Candidatus_Sulcia_muelleri_of_Fulgoridae	yes	cosegragation	yes	gen	sp6			phloem	phloem	intra	Prokaryota		yes	no	no			Denno and Perfect 1994 Novotny and Wilson 1997	Denno and Perfect 1994 Novotny and Wilson 1997	Müller 1962	Müller 1962
Hemiptera_Fulgoridae	Hemiptera	Fulgoridae	Candidatus Sulcia muelleri	Candidatus_Sulcia_muelleri_of_Fulgoridae	yes	cosegragation	yes	gen	sp7			phloem	phloem	intra	Prokaryota		yes	no	no			Denno and Perfect 1994 Novotny and Wilson 1997	Denno and Perfect 1994 Novotny and Wilson 1997	Müller 1962	Müller 1962
Hemiptera_Fulgoridae	Hemiptera	Fulgoridae	Candidatus Sulcia muelleri	Candidatus_Sulcia_muelleri_of_Fulgoridae	yes	cosegragation	yes	gen	sp8			phloem	phloem	intra	Prokaryota		yes	no	no			Denno and Perfect 1994 Novotny and Wilson 1997	Denno and Perfect 1994 Novotny and Wilson 1997	Müller 1962	Müller 1962
Hemiptera_Fulgoridae	Hemiptera	Fulgoridae	Candidatus Sulcia muelleri	Candidatus_Sulcia_muelleri_of_Fulgoridae	yes	cosegragation	yes	gen	sp9			phloem	phloem	intra	Prokaryota		yes	no	no			Denno and Perfect 1994 Novotny and Wilson 1997	Denno and Perfect 1994 Novotny and Wilson 1997	Müller 1962	Müller 1962
Hemiptera_Fulgoridae	Hemiptera	Fulgoridae	Candidatus Sulcia muelleri	Candidatus_Sulcia_muelleri_of_Fulgoridae	yes	cosegragation	yes	Poblicia	fuliginosa			phloem	phloem	intra	Prokaryota		yes	no	no			Denno and Perfect 1994 Novotny and Wilson 1997	Denno and Perfect 1994 Novotny and Wilson 1997	Urban and Cryan 2012
Hemiptera_Fulgoridae	Hemiptera	Fulgoridae	Candidatus Sulcia muelleri	Candidatus_Sulcia_muelleri_of_Fulgoridae	yes	cosegragation	yes	Alphina	glauca			phloem	phloem	intra	Prokaryota		yes	no	no			Denno and Perfect 1994 Novotny and Wilson 1997	Denno and Perfect 1994 Novotny and Wilson 1997	Urban and Cryan 2012
Hemiptera_Fulgoridae	Hemiptera	Fulgoridae	Candidatus Sulcia muelleri	Candidatus_Sulcia_muelleri_of_Fulgoridae	yes	cosegragation	yes	Episcius	guianensis			phloem	phloem	intra	Prokaryota		yes	no	no			Denno and Perfect 1994 Novotny and Wilson 1997	Denno and Perfect 1994 Novotny and Wilson 1997	Urban and Cryan 2012
Hemiptera_Fulgoridae	Hemiptera	Fulgoridae	Candidatus Sulcia muelleri	Candidatus_Sulcia_muelleri_of_Fulgoridae	yes	cosegragation	yes	Pterodictya	reticularis			phloem	phloem	intra	Prokaryota		yes	no	no			Denno and Perfect 1994 Novotny and Wilson 1997	Denno and Perfect 1994 Novotny and Wilson 1997	Urban and Cryan 2012
Hemiptera_Fulgoridae	Hemiptera	Fulgoridae	Candidatus Sulcia muelleri	Candidatus_Sulcia_muelleri_of_Fulgoridae	yes	cosegragation	yes	Enchophora	sanguinea			phloem	phloem	intra	Prokaryota		yes	no	no			Denno and Perfect 1994 Novotny and Wilson 1997	Denno and Perfect 1994 Novotny and Wilson 1997	Urban and Cryan 2012
Hemiptera_Fulgoridae	Hemiptera	Fulgoridae	Candidatus Sulcia muelleri	Candidatus_Sulcia_muelleri_of_Fulgoridae	yes	cosegragation	yes	Pyrops	sp			phloem	phloem	intra	Prokaryota		yes	no	no			Denno and Perfect 1994 Novotny and Wilson 1997	Denno and Perfect 1994 Novotny and Wilson 1997	Urban and Cryan 2012
Hemiptera_Fulgoridae	Hemiptera	Fulgoridae	Candidatus Sulcia muelleri	Candidatus_Sulcia_muelleri_of_Fulgoridae	yes	cosegragation	yes	Zanna	sp			phloem	phloem	intra	Prokaryota		yes	no	no			Denno and Perfect 1994 Novotny and Wilson 1997	Denno and Perfect 1994 Novotny and Wilson 1997	Urban and Cryan 2012
Hemiptera_Fulgoridae	Hemiptera	Fulgoridae	Candidatus Sulcia muelleri	Candidatus_Sulcia_muelleri_of_Fulgoridae	yes	cosegragation	yes	Phenax	variegata			phloem	phloem	intra	Prokaryota		yes	no	no			Denno and Perfect 1994 Novotny and Wilson 1997	Denno and Perfect 1994 Novotny and Wilson 1997	Urban and Cryan 2012
Hemiptera_Fulgoridae	Hemiptera	Fulgoridae	Candidatus Sulcia muelleri	Candidatus_Sulcia_muelleri_of_Fulgoridae	yes	cosegragation	yes	Amycle	vernalis			phloem	phloem	intra	Prokaryota		yes	no	no			Denno and Perfect 1994 Novotny and Wilson 1997	Denno and Perfect 1994 Novotny and Wilson 1997	Urban and Cryan 2012
Hemiptera_Fulgoridae	Hemiptera	Fulgoridae	Candidatus Vidania fulgoroideae	Candidatus_Vidania_fulgoroideae_of_Fulgoridae	yes	cosegragation	yes	gen	sp1			phloem	phloem	intra	Prokaryota		yes	no	no			Denno and Perfect 1994 Novotny and Wilson 1997	Denno and Perfect 1994 Novotny and Wilson 1997	Müller 1962	Müller 1962
Hemiptera_Fulgoridae	Hemiptera	Fulgoridae	Candidatus Vidania fulgoroideae	Candidatus_Vidania_fulgoroideae_of_Fulgoridae	yes	cosegragation	yes	gen	sp10			phloem	phloem	intra	Prokaryota		yes	no	no			Denno and Perfect 1994 Novotny and Wilson 1997	Denno and Perfect 1994 Novotny and Wilson 1997	Müller 1962	Müller 1962
Hemiptera_Fulgoridae	Hemiptera	Fulgoridae	Candidatus Vidania fulgoroideae	Candidatus_Vidania_fulgoroideae_of_Fulgoridae	yes	cosegragation	yes	gen	sp11			phloem	phloem	intra	Prokaryota		yes	no	no			Denno and Perfect 1994 Novotny and Wilson 1997	Denno and Perfect 1994 Novotny and Wilson 1997	Müller 1962	Müller 1962
Hemiptera_Fulgoridae	Hemiptera	Fulgoridae	Candidatus Vidania fulgoroideae	Candidatus_Vidania_fulgoroideae_of_Fulgoridae	yes	cosegragation	yes	gen	sp12			phloem	phloem	intra	Prokaryota		yes	no	no			Denno and Perfect 1994 Novotny and Wilson 1997	Denno and Perfect 1994 Novotny and Wilson 1997	Müller 1962	Müller 1962
Hemiptera_Fulgoridae	Hemiptera	Fulgoridae	Candidatus Vidania fulgoroideae	Candidatus_Vidania_fulgoroideae_of_Fulgoridae	yes	cosegragation	yes	gen	sp13			phloem	phloem	intra	Prokaryota		yes	no	no			Denno and Perfect 1994 Novotny and Wilson 1997	Denno and Perfect 1994 Novotny and Wilson 1997	Müller 1962	Müller 1962
Hemiptera_Fulgoridae	Hemiptera	Fulgoridae	Candidatus Vidania fulgoroideae	Candidatus_Vidania_fulgoroideae_of_Fulgoridae	yes	cosegragation	yes	gen	sp14			phloem	phloem	intra	Prokaryota		yes	no	no			Denno and Perfect 1994 Novotny and Wilson 1997	Denno and Perfect 1994 Novotny and Wilson 1997	Müller 1962	Müller 1962
Hemiptera_Fulgoridae	Hemiptera	Fulgoridae	Candidatus Vidania fulgoroideae	Candidatus_Vidania_fulgoroideae_of_Fulgoridae	yes	cosegragation	yes	gen	sp15			phloem	phloem	intra	Prokaryota		yes	no	no			Denno and Perfect 1994 Novotny and Wilson 1997	Denno and Perfect 1994 Novotny and Wilson 1997	Müller 1962	Müller 1962
Hemiptera_Fulgoridae	Hemiptera	Fulgoridae	Candidatus Vidania fulgoroideae	Candidatus_Vidania_fulgoroideae_of_Fulgoridae	yes	cosegragation	yes	gen	sp2			phloem	phloem	intra	Prokaryota		yes	no	no			Denno and Perfect 1994 Novotny and Wilson 1997	Denno and Perfect 1994 Novotny and Wilson 1997	Müller 1962	Müller 1962
Hemiptera_Fulgoridae	Hemiptera	Fulgoridae	Candidatus Vidania fulgoroideae	Candidatus_Vidania_fulgoroideae_of_Fulgoridae	yes	cosegragation	yes	gen	sp3			phloem	phloem	intra	Prokaryota		yes	no	no			Denno and Perfect 1994 Novotny and Wilson 1997	Denno and Perfect 1994 Novotny and Wilson 1997	Müller 1962	Müller 1962
Hemiptera_Fulgoridae	Hemiptera	Fulgoridae	Candidatus Vidania fulgoroideae	Candidatus_Vidania_fulgoroideae_of_Fulgoridae	yes	cosegragation	yes	gen	sp4			phloem	phloem	intra	Prokaryota		yes	no	no			Denno and Perfect 1994 Novotny and Wilson 1997	Denno and Perfect 1994 Novotny and Wilson 1997	Müller 1962	Müller 1962
Hemiptera_Fulgoridae	Hemiptera	Fulgoridae	Candidatus Vidania fulgoroideae	Candidatus_Vidania_fulgoroideae_of_Fulgoridae	yes	cosegragation	yes	gen	sp5			phloem	phloem	intra	Prokaryota		yes	no	no			Denno and Perfect 1994 Novotny and Wilson 1997	Denno and Perfect 1994 Novotny and Wilson 1997	Müller 1962	Müller 1962
Hemiptera_Fulgoridae	Hemiptera	Fulgoridae	Candidatus Vidania fulgoroideae	Candidatus_Vidania_fulgoroideae_of_Fulgoridae	yes	cosegragation	yes	gen	sp6			phloem	phloem	intra	Prokaryota		yes	no	no			Denno and Perfect 1994 Novotny and Wilson 1997	Denno and Perfect 1994 Novotny and Wilson 1997	Müller 1962	Müller 1962
Hemiptera_Fulgoridae	Hemiptera	Fulgoridae	Candidatus Vidania fulgoroideae	Candidatus_Vidania_fulgoroideae_of_Fulgoridae	yes	cosegragation	yes	gen	sp7			phloem	phloem	intra	Prokaryota		yes	no	no			Denno and Perfect 1994 Novotny and Wilson 1997	Denno and Perfect 1994 Novotny and Wilson 1997	Müller 1962	Müller 1962
Hemiptera_Fulgoridae	Hemiptera	Fulgoridae	Candidatus Vidania fulgoroideae	Candidatus_Vidania_fulgoroideae_of_Fulgoridae	yes	cosegragation	yes	gen	sp8			phloem	phloem	intra	Prokaryota		yes	no	no			Denno and Perfect 1994 Novotny and Wilson 1997	Denno and Perfect 1994 Novotny and Wilson 1997	Müller 1962	Müller 1962
Hemiptera_Fulgoridae	Hemiptera	Fulgoridae	Candidatus Vidania fulgoroideae	Candidatus_Vidania_fulgoroideae_of_Fulgoridae	yes	cosegragation	yes	gen	sp9			phloem	phloem	intra	Prokaryota		yes	no	no			Denno and Perfect 1994 Novotny and Wilson 1997	Denno and Perfect 1994 Novotny and Wilson 1997	Müller 1962	Müller 1962
Hemiptera_Fulgoridae	Hemiptera	Fulgoridae	Candidatus Vidania fulgoroideae	Candidatus_Vidania_fulgoroideae_of_Fulgoridae	yes	cosegragation	yes	Poblicia	fuliginosa			phloem	phloem	intra	Prokaryota		yes	no	no			Denno and Perfect 1994 Novotny and Wilson 1997	Denno and Perfect 1994 Novotny and Wilson 1997	Urban and Cryan 2012
Hemiptera_Fulgoridae	Hemiptera	Fulgoridae	Candidatus Vidania fulgoroideae	Candidatus_Vidania_fulgoroideae_of_Fulgoridae	yes	cosegragation	yes	Alphina	glauca			phloem	phloem	intra	Prokaryota		yes	no	no			Denno and Perfect 1994 Novotny and Wilson 1997	Denno and Perfect 1994 Novotny and Wilson 1997	Urban and Cryan 2012
Hemiptera_Fulgoridae	Hemiptera	Fulgoridae	Candidatus Vidania fulgoroideae	Candidatus_Vidania_fulgoroideae_of_Fulgoridae	yes	cosegragation	yes	Episcius	guianensis			phloem	phloem	intra	Prokaryota		yes	no	no			Denno and Perfect 1994 Novotny and Wilson 1997	Denno and Perfect 1994 Novotny and Wilson 1997	Urban and Cryan 2012
Hemiptera_Fulgoridae	Hemiptera	Fulgoridae	Candidatus Vidania fulgoroideae	Candidatus_Vidania_fulgoroideae_of_Fulgoridae	yes	cosegragation	yes	Pterodictya	reticularis			phloem	phloem	intra	Prokaryota		yes	no	no			Denno and Perfect 1994 Novotny and Wilson 1997	Denno and Perfect 1994 Novotny and Wilson 1997	Urban and Cryan 2012
Hemiptera_Fulgoridae	Hemiptera	Fulgoridae	Candidatus Vidania fulgoroideae	Candidatus_Vidania_fulgoroideae_of_Fulgoridae	yes	cosegragation	yes	Enchophora	sanguinea			phloem	phloem	intra	Prokaryota		yes	no	no			Denno and Perfect 1994 Novotny and Wilson 1997	Denno and Perfect 1994 Novotny and Wilson 1997	Urban and Cryan 2012
Hemiptera_Fulgoridae	Hemiptera	Fulgoridae	Candidatus Vidania fulgoroideae	Candidatus_Vidania_fulgoroideae_of_Fulgoridae	yes	cosegragation	yes	Pyrops	sp			phloem	phloem	intra	Prokaryota		yes	no	no			Denno and Perfect 1994 Novotny and Wilson 1997	Denno and Perfect 1994 Novotny and Wilson 1997	Urban and Cryan 2012
Hemiptera_Fulgoridae	Hemiptera	Fulgoridae	Candidatus Vidania fulgoroideae	Candidatus_Vidania_fulgoroideae_of_Fulgoridae	yes	cosegragation	yes	Zanna	sp			phloem	phloem	intra	Prokaryota		yes	no	no			Denno and Perfect 1994 Novotny and Wilson 1997	Denno and Perfect 1994 Novotny and Wilson 1997	Urban and Cryan 2012
Hemiptera_Fulgoridae	Hemiptera	Fulgoridae	Candidatus Vidania fulgoroideae	Candidatus_Vidania_fulgoroideae_of_Fulgoridae	yes	cosegragation	yes	Amycle	vernalis			phloem	phloem	intra	Prokaryota		yes	no	no			Denno and Perfect 1994 Novotny and Wilson 1997	Denno and Perfect 1994 Novotny and Wilson 1997	Urban and Cryan 2012
Hemiptera_Fulgoridae	Hemiptera	Fulgoridae	K-symbiont		yes		yes	gen	sp1			phloem	phloem	intra	Prokaryota		yes	no	no			Denno and Perfect 1994 Novotny and Wilson 1997	Denno and Perfect 1994 Novotny and Wilson 1997	Müller 1962	Müller 1962
Hemiptera_Fulgoridae	Hemiptera	Fulgoridae	K-symbiont		yes		yes	gen	sp10			phloem	phloem	intra	Prokaryota		yes	no	no			Denno and Perfect 1994 Novotny and Wilson 1997	Denno and Perfect 1994 Novotny and Wilson 1997	Müller 1962	Müller 1962
Hemiptera_Fulgoridae	Hemiptera	Fulgoridae	K-symbiont		yes		yes	gen	sp11			phloem	phloem	intra	Prokaryota		yes	no	no			Denno and Perfect 1994 Novotny and Wilson 1997	Denno and Perfect 1994 Novotny and Wilson 1997	Müller 1962	Müller 1962
Hemiptera_Fulgoridae	Hemiptera	Fulgoridae	K-symbiont		yes		yes	gen	sp12			phloem	phloem	intra	Prokaryota		yes	no	no			Denno and Perfect 1994 Novotny and Wilson 1997	Denno and Perfect 1994 Novotny and Wilson 1997	Müller 1962	Müller 1962
Hemiptera_Fulgoridae	Hemiptera	Fulgoridae	K-symbiont		yes		yes	gen	sp13			phloem	phloem	intra	Prokaryota		yes	no	no			Denno and Perfect 1994 Novotny and Wilson 1997	Denno and Perfect 1994 Novotny and Wilson 1997	Müller 1962	Müller 1962
Hemiptera_Fulgoridae	Hemiptera	Fulgoridae	K-symbiont		yes		yes	gen	sp14			phloem	phloem	intra	Prokaryota		yes	no	no			Denno and Perfect 1994 Novotny and Wilson 1997	Denno and Perfect 1994 Novotny and Wilson 1997	Müller 1962	Müller 1962
Hemiptera_Fulgoridae	Hemiptera	Fulgoridae	K-symbiont		yes		yes	gen	sp15			phloem	phloem	intra	Prokaryota		yes	no	no			Denno and Perfect 1994 Novotny and Wilson 1997	Denno and Perfect 1994 Novotny and Wilson 1997	Müller 1962	Müller 1962
Hemiptera_Fulgoridae	Hemiptera	Fulgoridae	K-symbiont		yes		yes	gen	sp2			phloem	phloem	intra	Prokaryota		yes	no	no			Denno and Perfect 1994 Novotny and Wilson 1997	Denno and Perfect 1994 Novotny and Wilson 1997	Müller 1962	Müller 1962
Hemiptera_Fulgoridae	Hemiptera	Fulgoridae	K-symbiont		yes		yes	gen	sp3			phloem	phloem	intra	Prokaryota		yes	no	no			Denno and Perfect 1994 Novotny and Wilson 1997	Denno and Perfect 1994 Novotny and Wilson 1997	Müller 1962	Müller 1962
Hemiptera_Fulgoridae	Hemiptera	Fulgoridae	K-symbiont		yes		yes	gen	sp4			phloem	phloem	intra	Prokaryota		yes	no	no			Denno and Perfect 1994 Novotny and Wilson 1997	Denno and Perfect 1994 Novotny and Wilson 1997	Müller 1962	Müller 1962
Hemiptera_Fulgoridae	Hemiptera	Fulgoridae	K-symbiont		yes		yes	gen	sp5			phloem	phloem	intra	Prokaryota		yes	no	no			Denno and Perfect 1994 Novotny and Wilson 1997	Denno and Perfect 1994 Novotny and Wilson 1997	Müller 1962	Müller 1962
Hemiptera_Fulgoridae	Hemiptera	Fulgoridae	K-symbiont		yes		yes	gen	sp6			phloem	phloem	intra	Prokaryota		yes	no	no			Denno and Perfect 1994 Novotny and Wilson 1997	Denno and Perfect 1994 Novotny and Wilson 1997	Müller 1962	Müller 1962
Hemiptera_Fulgoridae	Hemiptera	Fulgoridae	K-symbiont		yes		yes	gen	sp7			phloem	phloem	intra	Prokaryota		yes	no	no			Denno and Perfect 1994 Novotny and Wilson 1997	Denno and Perfect 1994 Novotny and Wilson 1997	Müller 1962	Müller 1962
Hemiptera_Fulgoridae	Hemiptera	Fulgoridae	K-symbiont		yes		yes	gen	sp8			phloem	phloem	intra	Prokaryota		yes	no	no			Denno and Perfect 1994 Novotny and Wilson 1997	Denno and Perfect 1994 Novotny and Wilson 1997	Müller 1962	Müller 1962
Hemiptera_Fulgoridae	Hemiptera	Fulgoridae	K-symbiont		yes		yes	gen	sp9			phloem	phloem	intra	Prokaryota		yes	no	no			Denno and Perfect 1994 Novotny and Wilson 1997	Denno and Perfect 1994 Novotny and Wilson 1997	Müller 1962	Müller 1962
Hemiptera_Geocoridae	Hemiptera	Geocoridae	none known		none known		no	Geocoris	lineola			insects/leaves/seeds	insects/leaves/seeds				yes	no	no			Tillman Mullinix 2003	Tillman Mullinix 2003	Schneider 1939	Schneider 1939
Hemiptera_Geocoridae	Hemiptera	Geocoridae	none known		none known		no	Geocoris	palidicornis			insects/leaves/seeds	insects/leaves/seeds				yes	no	no			Tillman Mullinix 2003	Tillman Mullinix 2003	Schneider 1939	Schneider 1939
Hemiptera_Geocoridae	Hemiptera	Geocoridae	Sodalis baculum		yes		yes	Henestaris	halophilus			seeds/fruit	seeds/fruit	intra	Prokaryota		yes	no	no			Santos-Garcia et al 2017	Santos-Garcia et al 2017	Santos-Garcia et al 2017	Santos-Garcia et al 2017
Hemiptera_Gerridae	Hemiptera	Gerridae	none known		none known		no	gen	sp			insects	insects				yes	no	no			Williams and Feltmate 1992	Williams and Feltmate 1992	Schneider 1939	Schneider 1939
Hemiptera_Halimococcidae	Hemiptera	Halimococcidae	Candidatus Uzinura diaspidicola														no	no	no					Andersen et al 2010 Campbell et al 2014
Hemiptera_Hebridae	Hemiptera	Hebridae	none known		none known		no	gen	sp			insects	insects				yes	no	no			Resh and Cardé 2009	Resh and Cardé 2009	Schneider 1939	Schneider 1939
Hemiptera_Hydrometridae	Hemiptera	Hydrometridae	none known		none known		no	gen	sp			insects	insects				yes	no	no			Maier 1977	Maier 1977	Schneider 1939	Schneider 1939
Hemiptera_Issidae	Hemiptera	Issidae	Candidatus Sulcia muelleri		yes	cosegragation	yes	gen	sp1			phloem	phloem	intra	Prokaryota		yes	no	no			Denno and Perfect 1994 Novotny and Wilson 1997	Denno and Perfect 1994 Novotny and Wilson 1997	Müller 1962	Müller 1962
Hemiptera_Issidae	Hemiptera	Issidae	Candidatus Sulcia muelleri		yes	cosegragation	yes	gen	sp2			phloem	phloem	intra	Prokaryota		yes	no	no			Denno and Perfect 1994 Novotny and Wilson 1997	Denno and Perfect 1994 Novotny and Wilson 1997	Müller 1962	Müller 1962
Hemiptera_Issidae	Hemiptera	Issidae	Candidatus Sulcia muelleri		yes	cosegragation	yes	gen	sp3			phloem	phloem	intra	Prokaryota		yes	no	no			Denno and Perfect 1994 Novotny and Wilson 1997	Denno and Perfect 1994 Novotny and Wilson 1997	Müller 1962	Müller 1962
Hemiptera_Issidae	Hemiptera	Issidae	Candidatus Sulcia muelleri		yes	cosegragation	yes	gen	sp4			phloem	phloem	intra	Prokaryota		yes	no	no			Denno and Perfect 1994 Novotny and Wilson 1997	Denno and Perfect 1994 Novotny and Wilson 1997	Müller 1962	Müller 1962
Hemiptera_Issidae	Hemiptera	Issidae	Candidatus Sulcia muelleri		yes	cosegragation	yes	gen	sp5			phloem	phloem	intra	Prokaryota		yes	no	no			Denno and Perfect 1994 Novotny and Wilson 1997	Denno and Perfect 1994 Novotny and Wilson 1997	Müller 1962	Müller 1962
Hemiptera_Issidae	Hemiptera	Issidae	Candidatus Sulcia muelleri		yes	cosegragation	yes	gen	sp6			phloem	phloem	intra	Prokaryota		yes	no	no			Denno and Perfect 1994 Novotny and Wilson 1997	Denno and Perfect 1994 Novotny and Wilson 1997	Müller 1962	Müller 1962
Hemiptera_Issidae	Hemiptera	Issidae	Candidatus Sulcia muelleri		yes	cosegragation	yes	gen	sp7			phloem	phloem	intra	Prokaryota		yes	no	no			Denno and Perfect 1994 Novotny and Wilson 1997	Denno and Perfect 1994 Novotny and Wilson 1997	Müller 1962	Müller 1962
Hemiptera_Issidae	Hemiptera	Issidae	Candidatus Sulcia muelleri		yes	cosegragation	yes	gen	sp8			phloem	phloem	intra	Prokaryota		yes	no	no			Denno and Perfect 1994 Novotny and Wilson 1997	Denno and Perfect 1994 Novotny and Wilson 1997	Müller 1962	Müller 1962
Hemiptera_Issidae	Hemiptera	Issidae	Candidatus Sulcia muelleri		yes	cosegragation	yes	gen	sp9			phloem	phloem	intra	Prokaryota		yes	no	no			Denno and Perfect 1994 Novotny and Wilson 1997	Denno and Perfect 1994 Novotny and Wilson 1997	Müller 1962	Müller 1962
Hemiptera_Issidae	Hemiptera	Issidae	Candidatus Vidania fulgoroideae		yes	cosegragation	yes	gen	sp1			phloem	phloem	intra	Prokaryota		yes	no	no			Denno and Perfect 1994 Novotny and Wilson 1997	Denno and Perfect 1994 Novotny and Wilson 1997	Müller 1962	Müller 1962
Hemiptera_Issidae	Hemiptera	Issidae	Candidatus Vidania fulgoroideae		yes	cosegragation	yes	gen	sp10			phloem	phloem	intra	Prokaryota		yes	no	no			Denno and Perfect 1994 Novotny and Wilson 1997	Denno and Perfect 1994 Novotny and Wilson 1997	Müller 1962	Müller 1962
Hemiptera_Issidae	Hemiptera	Issidae	Candidatus Vidania fulgoroideae		yes	cosegragation	yes	gen	sp2			phloem	phloem	intra	Prokaryota		yes	no	no			Denno and Perfect 1994 Novotny and Wilson 1997	Denno and Perfect 1994 Novotny and Wilson 1997	Müller 1962	Müller 1962
Hemiptera_Issidae	Hemiptera	Issidae	Candidatus Vidania fulgoroideae		yes	cosegragation	yes	gen	sp3			phloem	phloem	intra	Prokaryota		yes	no	no			Denno and Perfect 1994 Novotny and Wilson 1997	Denno and Perfect 1994 Novotny and Wilson 1997	Müller 1962	Müller 1962
Hemiptera_Issidae	Hemiptera	Issidae	Candidatus Vidania fulgoroideae		yes	cosegragation	yes	gen	sp4			phloem	phloem	intra	Prokaryota		yes	no	no			Denno and Perfect 1994 Novotny and Wilson 1997	Denno and Perfect 1994 Novotny and Wilson 1997	Müller 1962	Müller 1962
Hemiptera_Issidae	Hemiptera	Issidae	Candidatus Vidania fulgoroideae		yes	cosegragation	yes	gen	sp5			phloem	phloem	intra	Prokaryota		yes	no	no			Denno and Perfect 1994 Novotny and Wilson 1997	Denno and Perfect 1994 Novotny and Wilson 1997	Müller 1962	Müller 1962
Hemiptera_Issidae	Hemiptera	Issidae	Candidatus Vidania fulgoroideae		yes	cosegragation	yes	gen	sp6			phloem	phloem	intra	Prokaryota		yes	no	no			Denno and Perfect 1994 Novotny and Wilson 1997	Denno and Perfect 1994 Novotny and Wilson 1997	Müller 1962	Müller 1962
Hemiptera_Issidae	Hemiptera	Issidae	Candidatus Vidania fulgoroideae		yes	cosegragation	yes	gen	sp7			phloem	phloem	intra	Prokaryota		yes	no	no			Denno and Perfect 1994 Novotny and Wilson 1997	Denno and Perfect 1994 Novotny and Wilson 1997	Müller 1962	Müller 1962
Hemiptera_Issidae	Hemiptera	Issidae	Candidatus Vidania fulgoroideae		yes	cosegragation	yes	gen	sp8			phloem	phloem	intra	Prokaryota		yes	no	no			Denno and Perfect 1994 Novotny and Wilson 1997	Denno and Perfect 1994 Novotny and Wilson 1997	Müller 1962	Müller 1962
Hemiptera_Issidae	Hemiptera	Issidae	Candidatus Vidania fulgoroideae		yes	cosegragation	yes	gen	sp9			phloem	phloem	intra	Prokaryota		yes	no	no			Denno and Perfect 1994 Novotny and Wilson 1997	Denno and Perfect 1994 Novotny and Wilson 1997	Müller 1962	Müller 1962
Hemiptera_Issidae	Hemiptera	Issidae	F-symbiont		yes		yes	gen	sp10			phloem	phloem	intra	Prokaryota		yes	no	no			Denno and Perfect 1994 Novotny and Wilson 1997	Denno and Perfect 1994 Novotny and Wilson 1997	Müller 1962	Müller 1962
Hemiptera_Issidae	Hemiptera	Issidae	F-symbiont		yes		yes	gen	sp11			phloem	phloem	intra	Prokaryota		yes	no	no			Denno and Perfect 1994 Novotny and Wilson 1997	Denno and Perfect 1994 Novotny and Wilson 1997	Müller 1962	Müller 1962
Hemiptera_Issidae	Hemiptera	Issidae	F-symbiont		yes		yes	gen	sp12			phloem	phloem	intra	Prokaryota		yes	no	no			Denno and Perfect 1994 Novotny and Wilson 1997	Denno and Perfect 1994 Novotny and Wilson 1997	Müller 1962	Müller 1962
Hemiptera_Issidae	Hemiptera	Issidae	F-symbiont		yes		yes	gen	sp13			phloem	phloem	intra	Prokaryota		yes	no	no			Denno and Perfect 1994 Novotny and Wilson 1997	Denno and Perfect 1994 Novotny and Wilson 1997	Müller 1962	Müller 1962
Hemiptera_Issidae	Hemiptera	Issidae	F-symbiont		yes		yes	gen	sp14			phloem	phloem	intra	Prokaryota		yes	no	no			Denno and Perfect 1994 Novotny and Wilson 1997	Denno and Perfect 1994 Novotny and Wilson 1997	Müller 1962	Müller 1962
Hemiptera_Issidae	Hemiptera	Issidae	F-symbiont		yes		yes	gen	sp15			phloem	phloem	intra	Prokaryota		yes	no	no			Denno and Perfect 1994 Novotny and Wilson 1997	Denno and Perfect 1994 Novotny and Wilson 1997	Müller 1962	Müller 1962
Hemiptera_Issidae	Hemiptera	Issidae	F-symbiont		yes		yes	gen	sp16			phloem	phloem	intra	Prokaryota		yes	no	no			Denno and Perfect 1994 Novotny and Wilson 1997	Denno and Perfect 1994 Novotny and Wilson 1997	Müller 1962	Müller 1962
Hemiptera_Issidae	Hemiptera	Issidae	F-symbiont		yes		yes	gen	sp17			phloem	phloem	intra	Prokaryota		yes	no	no			Denno and Perfect 1994 Novotny and Wilson 1997	Denno and Perfect 1994 Novotny and Wilson 1997	Müller 1962	Müller 1962
Hemiptera_Issidae	Hemiptera	Issidae	F-symbiont		yes		yes	gen	sp18			phloem	phloem	intra	Prokaryota		yes	no	no			Denno and Perfect 1994 Novotny and Wilson 1997	Denno and Perfect 1994 Novotny and Wilson 1997	Müller 1962	Müller 1962
Hemiptera_Kermessidae	Hemiptera	Kermessidae	Fungi														no	no	no					Buchner 1955 (Buchner 1965)
Hemiptera_Largidae	Hemiptera	Largidae	Burkholdaria														no	no	no					Sudakaran et al 2015
Hemiptera_Largidae	Hemiptera	Largidae	Candidatus Lariskella arthropodarum														no	no	no					Matsuura et al 2012B
Hemiptera_Lecanodiaspididae	Hemiptera	Lecanodiaspididae	Flavobacteriales														no	no	no					Rosenblueth et al 2012
Hemiptera_Leptopodidae	Hemiptera	Leptopodidae	none known		none known		no	gen	sp				insects				yes	no	no				Baena 2011 Henry 2009	Schneider 1939	Schneider 1939
Hemiptera_Lophopidae	Hemiptera	Lophopidae	Candidatus Sulcia muelleri	Candidatus_Sulcia_muelleri_of_Lophopidae	yes	cosegragation	yes	gen	sp1			phloem	phloem	intra	Prokaryota		yes	no	no			Denno and Perfect 1994 Novotny and Wilson 1997	Denno and Perfect 1994 Novotny and Wilson 1997	Müller 1962	Müller 1962
Hemiptera_Lophopidae	Hemiptera	Lophopidae	Candidatus Vidania fulgoroideae	Candidatus_Vidania_fulgoroideae_of_Lophopidae	yes	cosegragation	yes	gen	sp1			phloem	phloem	intra	Prokaryota		yes	no	no			Denno and Perfect 1994 Novotny and Wilson 1997	Denno and Perfect 1994 Novotny and Wilson 1997	Müller 1962	Müller 1962
Hemiptera_Lophopidae	Hemiptera	Lophopidae	P-symbiont		yes		yes	gen	sp1			phloem	phloem	intra	Prokaryota		yes	no	no			Denno and Perfect 1994 Novotny and Wilson 1997	Denno and Perfect 1994 Novotny and Wilson 1997	Müller 1962	Müller 1962
Hemiptera_Lygaeidae	Hemiptera	Lygaeidae	Bacteria		yes		yes	Nysius	thymi		seeds	seeds	seeds	intra	Prokaryota		yes	no	no		Every 1990	Sweet 1960	Sweet 1960	Schneider 1939	Schneider 1939
Hemiptera_Lygaeidae	Hemiptera	Lygaeidae	Bacteria		yes		yes	Nysius	lineolatus			seeds	seeds	intra	Prokaryota		yes	no	no			Sweet 1960	Sweet 1960	Schneider 1939	Schneider 1939
Hemiptera_Lygaeidae	Hemiptera	Lygaeidae	Bacteria		yes		yes	Nysius	senecionis			seeds	seeds	intra	Prokaryota		yes	no	no			Sweet 1960	Sweet 1960	Schneider 1939	Schneider 1939
Hemiptera_Lygaeidae	Hemiptera	Lygaeidae	Candidatus Kleidoceria schneideri	Candidatus_Kleidoceria_schneideri	yes		yes	Kleidocerys	resedae		seeds	seeds	seeds	intra	Prokaryota		yes	yes	yes		Küchler et al 2010	Sweet 1960	Sweet 1960	Küchler et al 2010	Küchler et al 2010
Hemiptera_Lygaeidae	Hemiptera	Lygaeidae	Candidatus Rohrkolberia cinguli	Candidatus_Rohrkolberia_cinguli	yes		yes	Belonochilus	numenius		seeds	seeds	seeds	intra	Prokaryota		yes	yes	yes		Gessé et al 2009	Sweet 1960	Sweet 1960	Kuechler et al 2012	Kuechler et al 2012
Hemiptera_Lygaeidae	Hemiptera	Lygaeidae	Candidatus Schneideria nysicola	Candidatus_Schneideria_nysicola	yes		yes	Ortholomus	punctipennis			seeds	seeds	intra	Prokaryota		yes	yes	yes			Sweet 1960	Sweet 1960	Kuechler et al 2012	Kuechler et al 2012
Hemiptera_Lygaeidae	Hemiptera	Lygaeidae	Candidatus Schneideria nysicola	Candidatus_Schneideria_nysicola	yes		yes	Orsillus	depressus			seeds	seeds	intra	Prokaryota		yes	yes	yes			Sweet 1960	Sweet 1960	Kuechler et al 2012
Hemiptera_Lygaeidae	Hemiptera	Lygaeidae	Candidatus Schneideria nysicola	Candidatus_Schneideria_nysicola	yes		yes	Nysius	plebeius		seeds	seeds	seeds	intra	Prokaryota		yes	yes	yes		Every 1990	Sweet 1960	Sweet 1960	Matsuura et al 2012A	Matsuura et al 2012A
Hemiptera_Lygaeidae	Hemiptera	Lygaeidae	Candidatus Schneideria nysicola	Candidatus_Schneideria_nysicola	yes		yes	Nysius	expressus		seeds	seeds	seeds	intra	Prokaryota		yes	yes	yes		Every 1990	Sweet 1960	Sweet 1960	Matsuura et al 2012A
Hemiptera_Lygaeidae	Hemiptera	Lygaeidae	Candidatus Schneideria nysicola	Candidatus_Schneideria_nysicola	yes		yes	Nysius	sp		seeds	seeds	seeds	intra	Prokaryota		yes	yes	yes		Every 1990	Sweet 1960	Sweet 1960	Matsuura et al 2012A
Hemiptera_Lygaeidae	Hemiptera	Lygaeidae	Candidatus Sodalis pierantonius	Symbiont_of_Arocatus_longiceps	yes		yes	Arocatus	longiceps		seeds	seeds	seeds	intra	Prokaryota		yes	yes	yes		Kuechler et al 2012	Sweet 1960	Sweet 1960	Kuechler et al 2012	Kuechler et al 2012
Hemiptera_Lygaeidae	Hemiptera	Lygaeidae	Gammaproteobacteria		yes		yes	Chilacis	typhae		seeds	seeds	seeds	intra	Prokaryota		yes	yes	yes		Kuechler et al 2011 Sweet 1960	Sweet 1960	Sweet 1960	Kuechler et al 2012	Kuechler et al 2011
Hemiptera_Lygaeidae	Hemiptera	Lygaeidae	none known		none known		no	Cymus	claviculus	seeds	seeds	seeds	seeds				yes	no	no	Slater 1952	Slater 1952	Sweet 1960	Sweet 1960	Schneider 1939	Schneider 1939
Hemiptera_Lygaeidae	Hemiptera	Lygaeidae	none known		none known		no	Spilostethus	equestris			seeds	seeds				yes	no	no			Sweet 1960	Sweet 1960	Schneider 1939	Schneider 1939
Hemiptera_Lygaeidae	Hemiptera	Lygaeidae	none known		none known		no	Lygaeus	spp			seeds	seeds				yes	no	no			Sweet 1960	Sweet 1960	Schneider 1940	Schneider 1940
Hemiptera_Machaerotidae	Hemiptera	Machaerotidae	Candidatus Sulcia muelleri	Candidatus_Sulcia_muelleri_of_Machaerotidae	yes	cosegragation	yes	Machaerota	takeuchii			xylem	xylem	intra	Prokaryota		yes	no	no			Dem et al 2013	Dem et al 2013	Koga et al 2013A
Hemiptera_Machaerotidae	Hemiptera	Machaerotidae	Candidatus Sulcia muelleri	Candidatus_Sulcia_muelleri_of_Machaerotidae	yes	cosegragation	yes	Chaetophyes	vicina			xylem	xylem	intra	Prokaryota		yes	no	no			Dem et al 2013	Dem et al 2013	Koga et al 2013A
Hemiptera_Machaerotidae	Hemiptera	Machaerotidae	Candidatus Sulcia muelleri	Candidatus_Sulcia_muelleri_of_Machaerotidae	yes	cosegragation	yes	Hindoloides	bipunctata			xylem	xylem	intra	Prokaryota		yes	no	no			Dem et al 2013	Dem et al 2013	Moran et al 2005
Hemiptera_Machaerotidae	Hemiptera	Machaerotidae	Candidatus Zinderia insecticola	Candidatus_Zinderia_insecticola_of_Machaerotidae	yes	cosegragation	yes	Pectinariophyes	reticulata			xylem	xylem	intra	Prokaryota		yes	yes	no			Dem et al 2013	Dem et al 2013	Koga et al 2013A
Hemiptera_Machaerotidae	Hemiptera	Machaerotidae	Candidatus Zinderia insecticola	Candidatus_Zinderia_insecticola_of_Machaerotidae	yes	cosegragation	yes	Machaerota	takeuchii			xylem	xylem	intra	Prokaryota		yes	yes	no			Dem et al 2013	Dem et al 2013	Koga et al 2013A
Hemiptera_Machaerotidae	Hemiptera	Machaerotidae	Candidatus Zinderia insecticola	Candidatus_Zinderia_insecticola_of_Machaerotidae	yes	cosegragation	yes	Chaetophyes	vicina			xylem	xylem	intra	Prokaryota		yes	yes	no			Dem et al 2013	Dem et al 2013	Koga et al 2013A
Hemiptera_Malcidae	Hemiptera	Malcidae	none known														no	no	no					Kikuchi et al 2011
Hemiptera_Meenoplidae	Hemiptera	Meenoplidae	Candidatus Vidania fulgoroideae	Candidatus_Vidania_fulgoroideae_of_Meenoplidae	yes	cosegragation	yes	gen	sp1			phloem	phloem	intra	Prokaryota		yes	no	no			Denno and Perfect 1994 Novotny and Wilson 1997	Denno and Perfect 1994 Novotny and Wilson 1997	Müller 1962	Müller 1962
Hemiptera_Meenoplidae	Hemiptera	Meenoplidae	Candidatus Vidania fulgoroideae	Candidatus_Vidania_fulgoroideae_of_Meenoplidae	yes	cosegragation	yes	gen	sp2			phloem	phloem	intra	Prokaryota		yes	no	no			Denno and Perfect 1994 Novotny and Wilson 1997	Denno and Perfect 1994 Novotny and Wilson 1997	Müller 1962	Müller 1962
Hemiptera_Meenoplidae	Hemiptera	Meenoplidae	Candidatus Vidania fulgoroideae	Candidatus_Vidania_fulgoroideae_of_Meenoplidae	yes	cosegragation	yes	gen	sp3			phloem	phloem	intra	Prokaryota		yes	no	no			Denno and Perfect 1994 Novotny and Wilson 1997	Denno and Perfect 1994 Novotny and Wilson 1997	Müller 1962	Müller 1962
Hemiptera_Meenoplidae	Hemiptera	Meenoplidae	Candidatus Vidania fulgoroideae	Candidatus_Vidania_fulgoroideae_of_Meenoplidae	yes	cosegragation	yes	gen	sp4			phloem	phloem	intra	Prokaryota		yes	no	no			Denno and Perfect 1994 Novotny and Wilson 1997	Denno and Perfect 1994 Novotny and Wilson 1997	Müller 1962	Müller 1962
Hemiptera_Meenoplidae	Hemiptera	Meenoplidae	Candidatus Vidania fulgoroideae	Candidatus_Vidania_fulgoroideae_of_Meenoplidae	yes	cosegragation	yes	gen	sp5			phloem	phloem	intra	Prokaryota		yes	no	no			Denno and Perfect 1994 Novotny and Wilson 1997	Denno and Perfect 1994 Novotny and Wilson 1997	Müller 1962	Müller 1962
Hemiptera_Meenoplidae	Hemiptera	Meenoplidae	F-symbiont		yes		yes	gen	sp1			phloem	phloem	intra	Prokaryota		yes	no	no			Denno and Perfect 1994 Novotny and Wilson 1997	Denno and Perfect 1994 Novotny and Wilson 1997	Müller 1962	Müller 1962
Hemiptera_Meenoplidae	Hemiptera	Meenoplidae	F-symbiont		yes		yes	gen	sp2			phloem	phloem	intra	Prokaryota		yes	no	no			Denno and Perfect 1994 Novotny and Wilson 1997	Denno and Perfect 1994 Novotny and Wilson 1997	Müller 1962	Müller 1962
Hemiptera_Meenoplidae	Hemiptera	Meenoplidae	F-symbiont		yes		yes	gen	sp3			phloem	phloem	intra	Prokaryota		yes	no	no			Denno and Perfect 1994 Novotny and Wilson 1997	Denno and Perfect 1994 Novotny and Wilson 1997	Müller 1962	Müller 1962
Hemiptera_Meenoplidae	Hemiptera	Meenoplidae	F-symbiont		yes		yes	gen	sp4			phloem	phloem	intra	Prokaryota		yes	no	no			Denno and Perfect 1994 Novotny and Wilson 1997	Denno and Perfect 1994 Novotny and Wilson 1997	Müller 1962	Müller 1962
Hemiptera_Meenoplidae	Hemiptera	Meenoplidae	H-symbiont														no	no	no					Müller 1962
Hemiptera_Membracidae	Hemiptera	Membracidae	Candidatus Nasuia	Candidtus_Nasuia_deltocephalinicola	yes		yes	Entylia	carinata			phloem	phloem	intra	Prokaryota		yes	yes	no			Dem et al 2013	Dem et al 2013	Mao et al 2017	Mao et al 2017
Hemiptera_Membracidae	Hemiptera	Membracidae	Candidatus Sulcia muelleri	Candidatus_Sulcia_muelleri_of_Membracidae	yes	cosegragation	yes	Philya	ferruginosa			phloem	phloem	intra	Prokaryota		yes	no	no			Dem et al 2013	Dem et al 2013	Moran et al 2005
Hemiptera_Membracidae	Hemiptera	Membracidae	Candidatus Sulcia muelleri	Candidatus_Sulcia_muelleri_of_Membracidae	yes	cosegragation	yes	Spissistilus	festinus			phloem	phloem	intra	Prokaryota		yes	no	no			Dem et al 2013	Dem et al 2013	Moran et al 2005
Hemiptera_Membracidae	Hemiptera	Membracidae	Candidatus Sulcia muelleri	Candidatus_Sulcia_muelleri_of_Membracidae	yes	cosegragation	yes	Publilia	modesta			phloem	phloem	intra	Prokaryota		yes	no	no			Dem et al 2013	Dem et al 2013	Moran et al 2005
Hemiptera_Membracidae	Hemiptera	Membracidae	Candidatus Sulcia muelleri	Candidatus_Sulcia_muelleri_of_Membracidae	yes	cosegragation	yes	Platycotis	vittata			phloem	phloem	intra	Prokaryota		yes	no	no			Dem et al 2013	Dem et al 2013	Moran et al 2005
Hemiptera_Membracidae	Hemiptera	Membracidae	Candidatus Sulcia muelleri	Candidatus_Sulcia_muelleri_of_Membracidae	yes	cosegragation	yes	Centrotinae	sp10			phloem	phloem	intra	Prokaryota		yes	no	no			Dem et al 2013	Dem et al 2013	Müller 1962	Müller 1962
Hemiptera_Membracidae	Hemiptera	Membracidae	Candidatus Sulcia muelleri	Candidatus_Sulcia_muelleri_of_Membracidae	yes	cosegragation	yes	Centrotinae	sp11			phloem	phloem	intra	Prokaryota		yes	no	no			Dem et al 2013	Dem et al 2013	Müller 1962	Müller 1962
Hemiptera_Membracidae	Hemiptera	Membracidae	Candidatus Sulcia muelleri	Candidatus_Sulcia_muelleri_of_Membracidae	yes	cosegragation	yes	Heteronotinae	sp12			phloem	phloem	intra	Prokaryota		yes	no	no			Dem et al 2013	Dem et al 2013	Müller 1962	Müller 1962
Hemiptera_Membracidae	Hemiptera	Membracidae	Candidatus Sulcia muelleri	Candidatus_Sulcia_muelleri_of_Membracidae	yes	cosegragation	yes	Heteronotinae	sp13			phloem	phloem	intra	Prokaryota		yes	no	no			Dem et al 2013	Dem et al 2013	Müller 1962	Müller 1962
Hemiptera_Membracidae	Hemiptera	Membracidae	Candidatus Sulcia muelleri	Candidatus_Sulcia_muelleri_of_Membracidae	yes	cosegragation	yes	Heteronotinae	sp14			phloem	phloem	intra	Prokaryota		yes	no	no			Dem et al 2013	Dem et al 2013	Müller 1962	Müller 1962
Hemiptera_Membracidae	Hemiptera	Membracidae	Candidatus Sulcia muelleri	Candidatus_Sulcia_muelleri_of_Membracidae	yes	cosegragation	yes	Heteronotinae	sp15			phloem	phloem	intra	Prokaryota		yes	no	no			Dem et al 2013	Dem et al 2013	Müller 1962	Müller 1962
Hemiptera_Membracidae	Hemiptera	Membracidae	Candidatus Sulcia muelleri	Candidatus_Sulcia_muelleri_of_Membracidae	yes	cosegragation	yes	Heteronotinae	sp16			phloem	phloem	intra	Prokaryota		yes	no	no			Dem et al 2013	Dem et al 2013	Müller 1962	Müller 1962
Hemiptera_Membracidae	Hemiptera	Membracidae	Candidatus Sulcia muelleri	Candidatus_Sulcia_muelleri_of_Membracidae	yes	cosegragation	yes	Heteronotinae	sp17			phloem	phloem	intra	Prokaryota		yes	no	no			Dem et al 2013	Dem et al 2013	Müller 1962	Müller 1962
Hemiptera_Membracidae	Hemiptera	Membracidae	Candidatus Sulcia muelleri	Candidatus_Sulcia_muelleri_of_Membracidae	yes	cosegragation	yes	Heteronotinae	sp18			phloem	phloem	intra	Prokaryota		yes	no	no			Dem et al 2013	Dem et al 2013	Müller 1962	Müller 1962
Hemiptera_Membracidae	Hemiptera	Membracidae	Candidatus Sulcia muelleri	Candidatus_Sulcia_muelleri_of_Membracidae	yes	cosegragation	yes	Smiliinae	sp19			phloem	phloem	intra	Prokaryota		yes	no	no			Dem et al 2013	Dem et al 2013	Müller 1962	Müller 1962
Hemiptera_Membracidae	Hemiptera	Membracidae	Candidatus Sulcia muelleri	Candidatus_Sulcia_muelleri_of_Membracidae	yes	cosegragation	yes	Stegapsinae	sp2			phloem	phloem	intra	Prokaryota		yes	no	no			Dem et al 2013	Dem et al 2013	Müller 1962	Müller 1962
Hemiptera_Membracidae	Hemiptera	Membracidae	Candidatus Sulcia muelleri	Candidatus_Sulcia_muelleri_of_Membracidae	yes	cosegragation	yes	Smiliinae	sp20			phloem	phloem	intra	Prokaryota		yes	no	no			Dem et al 2013	Dem et al 2013	Müller 1962	Müller 1962
Hemiptera_Membracidae	Hemiptera	Membracidae	Candidatus Sulcia muelleri	Candidatus_Sulcia_muelleri_of_Membracidae	yes	cosegragation	yes	Smiliinae	sp21			phloem	phloem	intra	Prokaryota		yes	no	no			Dem et al 2013	Dem et al 2013	Müller 1962	Müller 1962
Hemiptera_Membracidae	Hemiptera	Membracidae	Candidatus Sulcia muelleri	Candidatus_Sulcia_muelleri_of_Membracidae	yes	cosegragation	yes	Smiliinae	sp22			phloem	phloem	intra	Prokaryota		yes	no	no			Dem et al 2013	Dem et al 2013	Müller 1962	Müller 1962
Hemiptera_Membracidae	Hemiptera	Membracidae	Candidatus Sulcia muelleri	Candidatus_Sulcia_muelleri_of_Membracidae	yes	cosegragation	yes	Smiliinae	sp23			phloem	phloem	intra	Prokaryota		yes	no	no			Dem et al 2013	Dem et al 2013	Müller 1962	Müller 1962
Hemiptera_Membracidae	Hemiptera	Membracidae	Candidatus Sulcia muelleri	Candidatus_Sulcia_muelleri_of_Membracidae	yes	cosegragation	yes	Smiliinae	sp24			phloem	phloem	intra	Prokaryota		yes	no	no			Dem et al 2013	Dem et al 2013	Müller 1962	Müller 1962
Hemiptera_Membracidae	Hemiptera	Membracidae	Candidatus Sulcia muelleri	Candidatus_Sulcia_muelleri_of_Membracidae	yes	cosegragation	yes	Smiliinae	sp25			phloem	phloem	intra	Prokaryota		yes	no	no			Dem et al 2013	Dem et al 2013	Müller 1962	Müller 1962
Hemiptera_Membracidae	Hemiptera	Membracidae	Candidatus Sulcia muelleri	Candidatus_Sulcia_muelleri_of_Membracidae	yes	cosegragation	yes	Smiliinae	sp26			phloem	phloem	intra	Prokaryota		yes	no	no			Dem et al 2013	Dem et al 2013	Müller 1962	Müller 1962
Hemiptera_Membracidae	Hemiptera	Membracidae	Candidatus Sulcia muelleri	Candidatus_Sulcia_muelleri_of_Membracidae	yes	cosegragation	yes	Smiliinae	sp27			phloem	phloem	intra	Prokaryota		yes	no	no			Dem et al 2013	Dem et al 2013	Müller 1962	Müller 1962
Hemiptera_Membracidae	Hemiptera	Membracidae	Candidatus Sulcia muelleri	Candidatus_Sulcia_muelleri_of_Membracidae	yes	cosegragation	yes	Smiliinae	sp28			phloem	phloem	intra	Prokaryota		yes	no	no			Dem et al 2013	Dem et al 2013	Müller 1962	Müller 1962
Hemiptera_Membracidae	Hemiptera	Membracidae	Candidatus Sulcia muelleri	Candidatus_Sulcia_muelleri_of_Membracidae	yes	cosegragation	yes	Smiliinae	sp29			phloem	phloem	intra	Prokaryota		yes	no	no			Dem et al 2013	Dem et al 2013	Müller 1962	Müller 1962
Hemiptera_Membracidae	Hemiptera	Membracidae	Candidatus Sulcia muelleri	Candidatus_Sulcia_muelleri_of_Membracidae	yes	cosegragation	yes	Stegapsinae	sp3			phloem	phloem	intra	Prokaryota		yes	no	no			Dem et al 2013	Dem et al 2013	Müller 1962	Müller 1962
Hemiptera_Membracidae	Hemiptera	Membracidae	Candidatus Sulcia muelleri	Candidatus_Sulcia_muelleri_of_Membracidae	yes	cosegragation	yes	Smiliinae	sp30			phloem	phloem	intra	Prokaryota		yes	no	no			Dem et al 2013	Dem et al 2013	Müller 1962	Müller 1962
Hemiptera_Membracidae	Hemiptera	Membracidae	Candidatus Sulcia muelleri	Candidatus_Sulcia_muelleri_of_Membracidae	yes	cosegragation	yes	Smiliinae	sp31			phloem	phloem	intra	Prokaryota		yes	no	no			Dem et al 2013	Dem et al 2013	Müller 1962	Müller 1962
Hemiptera_Membracidae	Hemiptera	Membracidae	Candidatus Sulcia muelleri	Candidatus_Sulcia_muelleri_of_Membracidae	yes	cosegragation	yes	Smiliinae	sp32			phloem	phloem	intra	Prokaryota		yes	no	no			Dem et al 2013	Dem et al 2013	Müller 1962	Müller 1962
Hemiptera_Membracidae	Hemiptera	Membracidae	Candidatus Sulcia muelleri	Candidatus_Sulcia_muelleri_of_Membracidae	yes	cosegragation	yes	Smiliinae	sp33			phloem	phloem	intra	Prokaryota		yes	no	no			Dem et al 2013	Dem et al 2013	Müller 1962	Müller 1962
Hemiptera_Membracidae	Hemiptera	Membracidae	Candidatus Sulcia muelleri	Candidatus_Sulcia_muelleri_of_Membracidae	yes	cosegragation	yes	Smiliinae	sp34			phloem	phloem	intra	Prokaryota		yes	no	no			Dem et al 2013	Dem et al 2013	Müller 1962	Müller 1962
Hemiptera_Membracidae	Hemiptera	Membracidae	Candidatus Sulcia muelleri	Candidatus_Sulcia_muelleri_of_Membracidae	yes	cosegragation	yes	Smiliinae	sp35			phloem	phloem	intra	Prokaryota		yes	no	no			Dem et al 2013	Dem et al 2013	Müller 1962	Müller 1962
Hemiptera_Membracidae	Hemiptera	Membracidae	Candidatus Sulcia muelleri	Candidatus_Sulcia_muelleri_of_Membracidae	yes	cosegragation	yes	Smiliinae	sp36			phloem	phloem	intra	Prokaryota		yes	no	no			Dem et al 2013	Dem et al 2013	Müller 1962	Müller 1962
Hemiptera_Membracidae	Hemiptera	Membracidae	Candidatus Sulcia muelleri	Candidatus_Sulcia_muelleri_of_Membracidae	yes	cosegragation	yes	Smiliinae	sp37			phloem	phloem	intra	Prokaryota		yes	no	no			Dem et al 2013	Dem et al 2013	Müller 1962	Müller 1962
Hemiptera_Membracidae	Hemiptera	Membracidae	Candidatus Sulcia muelleri	Candidatus_Sulcia_muelleri_of_Membracidae	yes	cosegragation	yes	Smiliinae	sp38			phloem	phloem	intra	Prokaryota		yes	no	no			Dem et al 2013	Dem et al 2013	Müller 1962	Müller 1962
Hemiptera_Membracidae	Hemiptera	Membracidae	Candidatus Sulcia muelleri	Candidatus_Sulcia_muelleri_of_Membracidae	yes	cosegragation	yes	Smiliinae	sp39			phloem	phloem	intra	Prokaryota		yes	no	no			Dem et al 2013	Dem et al 2013	Müller 1962	Müller 1962
Hemiptera_Membracidae	Hemiptera	Membracidae	Candidatus Sulcia muelleri	Candidatus_Sulcia_muelleri_of_Membracidae	yes	cosegragation	yes	Stegapsinae	sp4			phloem	phloem	intra	Prokaryota		yes	no	no			Dem et al 2013	Dem et al 2013	Müller 1962	Müller 1962
Hemiptera_Membracidae	Hemiptera	Membracidae	Candidatus Sulcia muelleri	Candidatus_Sulcia_muelleri_of_Membracidae	yes	cosegragation	yes	Smiliinae	sp40			phloem	phloem	intra	Prokaryota		yes	no	no			Dem et al 2013	Dem et al 2013	Müller 1962	Müller 1962
Hemiptera_Membracidae	Hemiptera	Membracidae	Candidatus Sulcia muelleri	Candidatus_Sulcia_muelleri_of_Membracidae	yes	cosegragation	yes	Smiliinae	sp41			phloem	phloem	intra	Prokaryota		yes	no	no			Dem et al 2013	Dem et al 2013	Müller 1962	Müller 1962
Hemiptera_Membracidae	Hemiptera	Membracidae	Candidatus Sulcia muelleri	Candidatus_Sulcia_muelleri_of_Membracidae	yes	cosegragation	yes	Hyphinoinae	sp42			phloem	phloem	intra	Prokaryota		yes	no	no			Dem et al 2013	Dem et al 2013	Müller 1962	Müller 1962
Hemiptera_Membracidae	Hemiptera	Membracidae	Candidatus Sulcia muelleri	Candidatus_Sulcia_muelleri_of_Membracidae	yes	cosegragation	yes	Hyphinoinae	sp43			phloem	phloem	intra	Prokaryota		yes	no	no			Dem et al 2013	Dem et al 2013	Müller 1962	Müller 1962
Hemiptera_Membracidae	Hemiptera	Membracidae	Candidatus Sulcia muelleri	Candidatus_Sulcia_muelleri_of_Membracidae	yes	cosegragation	yes	Hyphinoinae	sp44			phloem	phloem	intra	Prokaryota		yes	no	no			Dem et al 2013	Dem et al 2013	Müller 1962	Müller 1962
Hemiptera_Membracidae	Hemiptera	Membracidae	Candidatus Sulcia muelleri	Candidatus_Sulcia_muelleri_of_Membracidae	yes	cosegragation	yes	Hyphinoinae	sp45			phloem	phloem	intra	Prokaryota		yes	no	no			Dem et al 2013	Dem et al 2013	Müller 1962	Müller 1962
Hemiptera_Membracidae	Hemiptera	Membracidae	Candidatus Sulcia muelleri	Candidatus_Sulcia_muelleri_of_Membracidae	yes	cosegragation	yes	Hyphinoinae	sp46			phloem	phloem	intra	Prokaryota		yes	no	no			Dem et al 2013	Dem et al 2013	Müller 1962	Müller 1962
Hemiptera_Membracidae	Hemiptera	Membracidae	Candidatus Sulcia muelleri	Candidatus_Sulcia_muelleri_of_Membracidae	yes	cosegragation	yes	Hyphinoinae	sp47			phloem	phloem	intra	Prokaryota		yes	no	no			Dem et al 2013	Dem et al 2013	Müller 1962	Müller 1962
Hemiptera_Membracidae	Hemiptera	Membracidae	Candidatus Sulcia muelleri	Candidatus_Sulcia_muelleri_of_Membracidae	yes	cosegragation	yes	Hyphinoinae	sp48			phloem	phloem	intra	Prokaryota		yes	no	no			Dem et al 2013	Dem et al 2013	Müller 1962	Müller 1962
Hemiptera_Membracidae	Hemiptera	Membracidae	Candidatus Sulcia muelleri	Candidatus_Sulcia_muelleri_of_Membracidae	yes	cosegragation	yes	Hyphinoinae	sp49			phloem	phloem	intra	Prokaryota		yes	no	no			Dem et al 2013	Dem et al 2013	Müller 1962	Müller 1962
Hemiptera_Membracidae	Hemiptera	Membracidae	Candidatus Sulcia muelleri	Candidatus_Sulcia_muelleri_of_Membracidae	yes	cosegragation	yes	Tolaniinae	sp5			phloem	phloem	intra	Prokaryota		yes	no	no			Dem et al 2013	Dem et al 2013	Müller 1962	Müller 1962
Hemiptera_Membracidae	Hemiptera	Membracidae	Candidatus Sulcia muelleri	Candidatus_Sulcia_muelleri_of_Membracidae	yes	cosegragation	yes	Hyphinoinae	sp50			phloem	phloem	intra	Prokaryota		yes	no	no			Dem et al 2013	Dem et al 2013	Müller 1962	Müller 1962
Hemiptera_Membracidae	Hemiptera	Membracidae	Candidatus Sulcia muelleri	Candidatus_Sulcia_muelleri_of_Membracidae	yes	cosegragation	yes	Hyphinoinae	sp51			phloem	phloem	intra	Prokaryota		yes	no	no			Dem et al 2013	Dem et al 2013	Müller 1962	Müller 1962
Hemiptera_Membracidae	Hemiptera	Membracidae	Candidatus Sulcia muelleri	Candidatus_Sulcia_muelleri_of_Membracidae	yes	cosegragation	yes	Hyphinoinae	sp52			phloem	phloem	intra	Prokaryota		yes	no	no			Dem et al 2013	Dem et al 2013	Müller 1962	Müller 1962
Hemiptera_Membracidae	Hemiptera	Membracidae	Candidatus Sulcia muelleri	Candidatus_Sulcia_muelleri_of_Membracidae	yes	cosegragation	yes	Darniinae	sp53			phloem	phloem	intra	Prokaryota		yes	no	no			Dem et al 2013	Dem et al 2013	Müller 1962	Müller 1962
Hemiptera_Membracidae	Hemiptera	Membracidae	Candidatus Sulcia muelleri	Candidatus_Sulcia_muelleri_of_Membracidae	yes	cosegragation	yes	Darniinae	sp54			phloem	phloem	intra	Prokaryota		yes	no	no			Dem et al 2013	Dem et al 2013	Müller 1962	Müller 1962
Hemiptera_Membracidae	Hemiptera	Membracidae	Candidatus Sulcia muelleri	Candidatus_Sulcia_muelleri_of_Membracidae	yes	cosegragation	yes	Darniinae	sp55			phloem	phloem	intra	Prokaryota		yes	no	no			Dem et al 2013	Dem et al 2013	Müller 1962	Müller 1962
Hemiptera_Membracidae	Hemiptera	Membracidae	Candidatus Sulcia muelleri	Candidatus_Sulcia_muelleri_of_Membracidae	yes	cosegragation	yes	Darniinae	sp56			phloem	phloem	intra	Prokaryota		yes	no	no			Dem et al 2013	Dem et al 2013	Müller 1962	Müller 1962
Hemiptera_Membracidae	Hemiptera	Membracidae	Candidatus Sulcia muelleri	Candidatus_Sulcia_muelleri_of_Membracidae	yes	cosegragation	yes	Darniinae	sp57			phloem	phloem	intra	Prokaryota		yes	no	no			Dem et al 2013	Dem et al 2013	Müller 1962	Müller 1962
Hemiptera_Membracidae	Hemiptera	Membracidae	Candidatus Sulcia muelleri	Candidatus_Sulcia_muelleri_of_Membracidae	yes	cosegragation	yes	Darniinae	sp58			phloem	phloem	intra	Prokaryota		yes	no	no			Dem et al 2013	Dem et al 2013	Müller 1962	Müller 1962
Hemiptera_Membracidae	Hemiptera	Membracidae	Candidatus Sulcia muelleri	Candidatus_Sulcia_muelleri_of_Membracidae	yes	cosegragation	yes	Darniinae	sp59			phloem	phloem	intra	Prokaryota		yes	no	no			Dem et al 2013	Dem et al 2013	Müller 1962	Müller 1962
Hemiptera_Membracidae	Hemiptera	Membracidae	Candidatus Sulcia muelleri	Candidatus_Sulcia_muelleri_of_Membracidae	yes	cosegragation	yes	Tolaniinae	sp6			phloem	phloem	intra	Prokaryota		yes	no	no			Dem et al 2013	Dem et al 2013	Müller 1962	Müller 1962
Hemiptera_Membracidae	Hemiptera	Membracidae	Candidatus Sulcia muelleri	Candidatus_Sulcia_muelleri_of_Membracidae	yes	cosegragation	yes	Darniinae	sp60			phloem	phloem	intra	Prokaryota		yes	no	no			Dem et al 2013	Dem et al 2013	Müller 1962	Müller 1962
Hemiptera_Membracidae	Hemiptera	Membracidae	Candidatus Sulcia muelleri	Candidatus_Sulcia_muelleri_of_Membracidae	yes	cosegragation	yes	Polyglypginae	sp61			phloem	phloem	intra	Prokaryota		yes	no	no			Dem et al 2013	Dem et al 2013	Müller 1962	Müller 1962
Hemiptera_Membracidae	Hemiptera	Membracidae	Candidatus Sulcia muelleri	Candidatus_Sulcia_muelleri_of_Membracidae	yes	cosegragation	yes	Polyglypginae	sp62			phloem	phloem	intra	Prokaryota		yes	no	no			Dem et al 2013	Dem et al 2013	Müller 1962	Müller 1962
Hemiptera_Membracidae	Hemiptera	Membracidae	Candidatus Sulcia muelleri	Candidatus_Sulcia_muelleri_of_Membracidae	yes	cosegragation	yes	Polyglypginae	sp63			phloem	phloem	intra	Prokaryota		yes	no	no			Dem et al 2013	Dem et al 2013	Müller 1962	Müller 1962
Hemiptera_Membracidae	Hemiptera	Membracidae	Candidatus Sulcia muelleri	Candidatus_Sulcia_muelleri_of_Membracidae	yes	cosegragation	yes	Polyglypginae	sp64			phloem	phloem	intra	Prokaryota		yes	no	no			Dem et al 2013	Dem et al 2013	Müller 1962	Müller 1962
Hemiptera_Membracidae	Hemiptera	Membracidae	Candidatus Sulcia muelleri	Candidatus_Sulcia_muelleri_of_Membracidae	yes	cosegragation	yes	Polyglypginae	sp65			phloem	phloem	intra	Prokaryota		yes	no	no			Dem et al 2013	Dem et al 2013	Müller 1962	Müller 1962
Hemiptera_Membracidae	Hemiptera	Membracidae	Candidatus Sulcia muelleri	Candidatus_Sulcia_muelleri_of_Membracidae	yes	cosegragation	yes	Polyglypginae	sp66			phloem	phloem	intra	Prokaryota		yes	no	no			Dem et al 2013	Dem et al 2013	Müller 1962	Müller 1962
Hemiptera_Membracidae	Hemiptera	Membracidae	Candidatus Sulcia muelleri	Candidatus_Sulcia_muelleri_of_Membracidae	yes	cosegragation	yes	Polyglypginae	sp67			phloem	phloem	intra	Prokaryota		yes	no	no			Dem et al 2013	Dem et al 2013	Müller 1962	Müller 1962
Hemiptera_Membracidae	Hemiptera	Membracidae	Candidatus Sulcia muelleri	Candidatus_Sulcia_muelleri_of_Membracidae	yes	cosegragation	yes	Polyglypginae	sp68			phloem	phloem	intra	Prokaryota		yes	no	no			Dem et al 2013	Dem et al 2013	Müller 1962	Müller 1962
Hemiptera_Membracidae	Hemiptera	Membracidae	Candidatus Sulcia muelleri	Candidatus_Sulcia_muelleri_of_Membracidae	yes	cosegragation	yes	Polyglypginae	sp69			phloem	phloem	intra	Prokaryota		yes	no	no			Dem et al 2013	Dem et al 2013	Müller 1962	Müller 1962
Hemiptera_Membracidae	Hemiptera	Membracidae	Candidatus Sulcia muelleri	Candidatus_Sulcia_muelleri_of_Membracidae	yes	cosegragation	yes	Tolaniinae	sp7			phloem	phloem	intra	Prokaryota		yes	no	no			Dem et al 2013	Dem et al 2013	Müller 1962	Müller 1962
Hemiptera_Membracidae	Hemiptera	Membracidae	Candidatus Sulcia muelleri	Candidatus_Sulcia_muelleri_of_Membracidae	yes	cosegragation	yes	Polyglypginae	sp70			phloem	phloem	intra	Prokaryota		yes	no	no			Dem et al 2013	Dem et al 2013	Müller 1962	Müller 1962
Hemiptera_Membracidae	Hemiptera	Membracidae	Candidatus Sulcia muelleri	Candidatus_Sulcia_muelleri_of_Membracidae	yes	cosegragation	yes	Polyglypginae	sp71			phloem	phloem	intra	Prokaryota		yes	no	no			Dem et al 2013	Dem et al 2013	Müller 1962	Müller 1962
Hemiptera_Membracidae	Hemiptera	Membracidae	Candidatus Sulcia muelleri	Candidatus_Sulcia_muelleri_of_Membracidae	yes	cosegragation	yes	Polyglypginae	sp72			phloem	phloem	intra	Prokaryota		yes	no	no			Dem et al 2013	Dem et al 2013	Müller 1962	Müller 1962
Hemiptera_Membracidae	Hemiptera	Membracidae	Candidatus Sulcia muelleri	Candidatus_Sulcia_muelleri_of_Membracidae	yes	cosegragation	yes	Polyglypginae	sp73			phloem	phloem	intra	Prokaryota		yes	no	no			Dem et al 2013	Dem et al 2013	Müller 1962	Müller 1962
Hemiptera_Membracidae	Hemiptera	Membracidae	Candidatus Sulcia muelleri	Candidatus_Sulcia_muelleri_of_Membracidae	yes	cosegragation	yes	Polyglypginae	sp74			phloem	phloem	intra	Prokaryota		yes	no	no			Dem et al 2013	Dem et al 2013	Müller 1962	Müller 1962
Hemiptera_Membracidae	Hemiptera	Membracidae	Candidatus Sulcia muelleri	Candidatus_Sulcia_muelleri_of_Membracidae	yes	cosegragation	yes	Polyglypginae	sp75			phloem	phloem	intra	Prokaryota		yes	no	no			Dem et al 2013	Dem et al 2013	Müller 1962	Müller 1962
Hemiptera_Membracidae	Hemiptera	Membracidae	Candidatus Sulcia muelleri	Candidatus_Sulcia_muelleri_of_Membracidae	yes	cosegragation	yes	Polyglypginae	sp76			phloem	phloem	intra	Prokaryota		yes	no	no			Dem et al 2013	Dem et al 2013	Müller 1962	Müller 1962
Hemiptera_Membracidae	Hemiptera	Membracidae	Candidatus Sulcia muelleri	Candidatus_Sulcia_muelleri_of_Membracidae	yes	cosegragation	yes	Membraeinae	sp77			phloem	phloem	intra	Prokaryota		yes	no	no			Dem et al 2013	Dem et al 2013	Müller 1962	Müller 1962
Hemiptera_Membracidae	Hemiptera	Membracidae	Candidatus Sulcia muelleri	Candidatus_Sulcia_muelleri_of_Membracidae	yes	cosegragation	yes	Membraeinae	sp78			phloem	phloem	intra	Prokaryota		yes	no	no			Dem et al 2013	Dem et al 2013	Müller 1962	Müller 1962
Hemiptera_Membracidae	Hemiptera	Membracidae	Candidatus Sulcia muelleri	Candidatus_Sulcia_muelleri_of_Membracidae	yes	cosegragation	yes	Membraeinae	sp79			phloem	phloem	intra	Prokaryota		yes	no	no			Dem et al 2013	Dem et al 2013	Müller 1962	Müller 1962
Hemiptera_Membracidae	Hemiptera	Membracidae	Candidatus Sulcia muelleri	Candidatus_Sulcia_muelleri_of_Membracidae	yes	cosegragation	yes	Tolaniinae	sp8			phloem	phloem	intra	Prokaryota		yes	no	no			Dem et al 2013	Dem et al 2013	Müller 1962	Müller 1962
Hemiptera_Membracidae	Hemiptera	Membracidae	Candidatus Sulcia muelleri	Candidatus_Sulcia_muelleri_of_Membracidae	yes	cosegragation	yes	Membraeinae	sp80			phloem	phloem	intra	Prokaryota		yes	no	no			Dem et al 2013	Dem et al 2013	Müller 1962	Müller 1962
Hemiptera_Membracidae	Hemiptera	Membracidae	Candidatus Sulcia muelleri	Candidatus_Sulcia_muelleri_of_Membracidae	yes	cosegragation	yes	Membraeinae	sp81			phloem	phloem	intra	Prokaryota		yes	no	no			Dem et al 2013	Dem et al 2013	Müller 1962	Müller 1962
Hemiptera_Membracidae	Hemiptera	Membracidae	Candidatus Sulcia muelleri	Candidatus_Sulcia_muelleri_of_Membracidae	yes	cosegragation	yes	Membraeinae	sp82			phloem	phloem	intra	Prokaryota		yes	no	no			Dem et al 2013	Dem et al 2013	Müller 1962	Müller 1962
Hemiptera_Membracidae	Hemiptera	Membracidae	Candidatus Sulcia muelleri	Candidatus_Sulcia_muelleri_of_Membracidae	yes	cosegragation	yes	Membraeinae	sp83			phloem	phloem	intra	Prokaryota		yes	no	no			Dem et al 2013	Dem et al 2013	Müller 1962	Müller 1962
Hemiptera_Membracidae	Hemiptera	Membracidae	Candidatus Sulcia muelleri	Candidatus_Sulcia_muelleri_of_Membracidae	yes	cosegragation	yes	Membraeinae	sp84			phloem	phloem	intra	Prokaryota		yes	no	no			Dem et al 2013	Dem et al 2013	Müller 1962	Müller 1962
Hemiptera_Membracidae	Hemiptera	Membracidae	Candidatus Sulcia muelleri	Candidatus_Sulcia_muelleri_of_Membracidae	yes	cosegragation	yes	Membraeinae	sp85			phloem	phloem	intra	Prokaryota		yes	no	no			Dem et al 2013	Dem et al 2013	Müller 1962	Müller 1962
Hemiptera_Membracidae	Hemiptera	Membracidae	Candidatus Sulcia muelleri	Candidatus_Sulcia_muelleri_of_Membracidae	yes	cosegragation	yes	Membraeinae	sp86			phloem	phloem	intra	Prokaryota		yes	no	no			Dem et al 2013	Dem et al 2013	Müller 1962	Müller 1962
Hemiptera_Membracidae	Hemiptera	Membracidae	Candidatus Sulcia muelleri	Candidatus_Sulcia_muelleri_of_Membracidae	yes	cosegragation	yes	Membraeinae	sp87			phloem	phloem	intra	Prokaryota		yes	no	no			Dem et al 2013	Dem et al 2013	Müller 1962	Müller 1962
Hemiptera_Membracidae	Hemiptera	Membracidae	Candidatus Sulcia muelleri	Candidatus_Sulcia_muelleri_of_Membracidae	yes	cosegragation	yes	Membraeinae	sp88			phloem	phloem	intra	Prokaryota		yes	no	no			Dem et al 2013	Dem et al 2013	Müller 1962	Müller 1962
Hemiptera_Membracidae	Hemiptera	Membracidae	Candidatus Sulcia muelleri	Candidatus_Sulcia_muelleri_of_Membracidae	yes	cosegragation	yes	Membraeinae	sp89			phloem	phloem	intra	Prokaryota		yes	no	no			Dem et al 2013	Dem et al 2013	Müller 1962	Müller 1962
Hemiptera_Membracidae	Hemiptera	Membracidae	Candidatus Sulcia muelleri	Candidatus_Sulcia_muelleri_of_Membracidae	yes	cosegragation	yes	Centrotinae	sp9			phloem	phloem	intra	Prokaryota		yes	no	no			Dem et al 2013	Dem et al 2013	Müller 1962	Müller 1962
Hemiptera_Membracidae	Hemiptera	Membracidae	Candidatus Sulcia muelleri	Candidatus_Sulcia_muelleri_of_Membracidae	yes	cosegragation	yes	Membraeinae	sp90			phloem	phloem	intra	Prokaryota		yes	no	no			Dem et al 2013	Dem et al 2013	Müller 1962	Müller 1962
Hemiptera_Membracidae	Hemiptera	Membracidae	Candidatus Sulcia muelleri	Candidatus_Sulcia_muelleri_of_Membracidae	yes	cosegragation	yes	Membraeinae	sp91			phloem	phloem	intra	Prokaryota		yes	no	no			Dem et al 2013	Dem et al 2013	Müller 1962	Müller 1962
Hemiptera_Membracidae	Hemiptera	Membracidae	Candidatus Sulcia muelleri	Candidatus_Sulcia_muelleri_of_Membracidae	yes	cosegragation	yes	Membraeinae	sp92			phloem	phloem	intra	Prokaryota		yes	no	no			Dem et al 2013	Dem et al 2013	Müller 1962	Müller 1962
Hemiptera_Membracidae	Hemiptera	Membracidae	Candidatus Sulcia muelleri	Candidatus_Sulcia_muelleri_of_Membracidae	yes	cosegragation	yes	Membraeinae	sp93			phloem	phloem	intra	Prokaryota		yes	no	no			Dem et al 2013	Dem et al 2013	Müller 1962	Müller 1962
Hemiptera_Membracidae	Hemiptera	Membracidae	Candidatus Sulcia muelleri	Candidatus_Sulcia_muelleri_of_Membracidae	yes	cosegragation	yes	Membraeinae	sp94			phloem	phloem	intra	Prokaryota		yes	no	no			Dem et al 2013	Dem et al 2013	Müller 1962	Müller 1962
Hemiptera_Membracidae	Hemiptera	Membracidae	H-symbiont														no	no	no					Müller 1962
Hemiptera_Membracidae	Hemiptera	Membracidae	T-symbiont		yes		yes	Centrotinae	sp10			phloem	phloem	intra	Prokaryota		yes	no	no			Dem et al 2013	Dem et al 2013	Müller 1962	Müller 1962
Hemiptera_Membracidae	Hemiptera	Membracidae	T-symbiont		yes		yes	Centrotinae	sp11			phloem	phloem	intra	Prokaryota		yes	no	no			Dem et al 2013	Dem et al 2013	Müller 1962	Müller 1962
Hemiptera_Membracidae	Hemiptera	Membracidae	T-symbiont		yes		yes	Smiliinae	sp19			phloem	phloem	intra	Prokaryota		yes	no	no			Dem et al 2013	Dem et al 2013	Müller 1962	Müller 1962
Hemiptera_Membracidae	Hemiptera	Membracidae	T-symbiont		yes		yes	Stegapsinae	sp2			phloem	phloem	intra	Prokaryota		yes	no	no			Dem et al 2013	Dem et al 2013	Müller 1962	Müller 1962
Hemiptera_Membracidae	Hemiptera	Membracidae	T-symbiont		yes		yes	Smiliinae	sp20			phloem	phloem	intra	Prokaryota		yes	no	no			Dem et al 2013	Dem et al 2013	Müller 1962	Müller 1962
Hemiptera_Membracidae	Hemiptera	Membracidae	T-symbiont		yes		yes	Smiliinae	sp21			phloem	phloem	intra	Prokaryota		yes	no	no			Dem et al 2013	Dem et al 2013	Müller 1962	Müller 1962
Hemiptera_Membracidae	Hemiptera	Membracidae	T-symbiont		yes		yes	Smiliinae	sp22			phloem	phloem	intra	Prokaryota		yes	no	no			Dem et al 2013	Dem et al 2013	Müller 1962	Müller 1962
Hemiptera_Membracidae	Hemiptera	Membracidae	T-symbiont		yes		yes	Smiliinae	sp23			phloem	phloem	intra	Prokaryota		yes	no	no			Dem et al 2013	Dem et al 2013	Müller 1962	Müller 1962
Hemiptera_Membracidae	Hemiptera	Membracidae	T-symbiont		yes		yes	Smiliinae	sp24			phloem	phloem	intra	Prokaryota		yes	no	no			Dem et al 2013	Dem et al 2013	Müller 1962	Müller 1962
Hemiptera_Membracidae	Hemiptera	Membracidae	T-symbiont		yes		yes	Smiliinae	sp25			phloem	phloem	intra	Prokaryota		yes	no	no			Dem et al 2013	Dem et al 2013	Müller 1962	Müller 1962
Hemiptera_Membracidae	Hemiptera	Membracidae	T-symbiont		yes		yes	Smiliinae	sp26			phloem	phloem	intra	Prokaryota		yes	no	no			Dem et al 2013	Dem et al 2013	Müller 1962	Müller 1962
Hemiptera_Membracidae	Hemiptera	Membracidae	T-symbiont		yes		yes	Smiliinae	sp27			phloem	phloem	intra	Prokaryota		yes	no	no			Dem et al 2013	Dem et al 2013	Müller 1962	Müller 1962
Hemiptera_Membracidae	Hemiptera	Membracidae	T-symbiont		yes		yes	Smiliinae	sp28			phloem	phloem	intra	Prokaryota		yes	no	no			Dem et al 2013	Dem et al 2013	Müller 1962	Müller 1962
Hemiptera_Membracidae	Hemiptera	Membracidae	T-symbiont		yes		yes	Smiliinae	sp29			phloem	phloem	intra	Prokaryota		yes	no	no			Dem et al 2013	Dem et al 2013	Müller 1962	Müller 1962
Hemiptera_Membracidae	Hemiptera	Membracidae	T-symbiont		yes		yes	Smiliinae	sp30			phloem	phloem	intra	Prokaryota		yes	no	no			Dem et al 2013	Dem et al 2013	Müller 1962	Müller 1962
Hemiptera_Membracidae	Hemiptera	Membracidae	T-symbiont		yes		yes	Smiliinae	sp31			phloem	phloem	intra	Prokaryota		yes	no	no			Dem et al 2013	Dem et al 2013	Müller 1962	Müller 1962
Hemiptera_Membracidae	Hemiptera	Membracidae	T-symbiont		yes		yes	Smiliinae	sp32			phloem	phloem	intra	Prokaryota		yes	no	no			Dem et al 2013	Dem et al 2013	Müller 1962	Müller 1962
Hemiptera_Membracidae	Hemiptera	Membracidae	T-symbiont		yes		yes	Smiliinae	sp33			phloem	phloem	intra	Prokaryota		yes	no	no			Dem et al 2013	Dem et al 2013	Müller 1962	Müller 1962
Hemiptera_Membracidae	Hemiptera	Membracidae	T-symbiont		yes		yes	Smiliinae	sp34			phloem	phloem	intra	Prokaryota		yes	no	no			Dem et al 2013	Dem et al 2013	Müller 1962	Müller 1962
Hemiptera_Membracidae	Hemiptera	Membracidae	T-symbiont		yes		yes	Smiliinae	sp35			phloem	phloem	intra	Prokaryota		yes	no	no			Dem et al 2013	Dem et al 2013	Müller 1962	Müller 1962
Hemiptera_Membracidae	Hemiptera	Membracidae	T-symbiont		yes		yes	Hyphinoinae	sp42			phloem	phloem	intra	Prokaryota		yes	no	no			Dem et al 2013	Dem et al 2013	Müller 1962	Müller 1962
Hemiptera_Membracidae	Hemiptera	Membracidae	T-symbiont		yes		yes	Hyphinoinae	sp43			phloem	phloem	intra	Prokaryota		yes	no	no			Dem et al 2013	Dem et al 2013	Müller 1962	Müller 1962
Hemiptera_Membracidae	Hemiptera	Membracidae	T-symbiont		yes		yes	Hyphinoinae	sp44			phloem	phloem	intra	Prokaryota		yes	no	no			Dem et al 2013	Dem et al 2013	Müller 1962	Müller 1962
Hemiptera_Membracidae	Hemiptera	Membracidae	T-symbiont		yes		yes	Hyphinoinae	sp45			phloem	phloem	intra	Prokaryota		yes	no	no			Dem et al 2013	Dem et al 2013	Müller 1962	Müller 1962
Hemiptera_Membracidae	Hemiptera	Membracidae	T-symbiont		yes		yes	Hyphinoinae	sp46			phloem	phloem	intra	Prokaryota		yes	no	no			Dem et al 2013	Dem et al 2013	Müller 1962	Müller 1962
Hemiptera_Membracidae	Hemiptera	Membracidae	T-symbiont		yes		yes	Tolaniinae	sp5			phloem	phloem	intra	Prokaryota		yes	no	no			Dem et al 2013	Dem et al 2013	Müller 1962	Müller 1962
Hemiptera_Membracidae	Hemiptera	Membracidae	T-symbiont		yes		yes	Darniinae	sp53			phloem	phloem	intra	Prokaryota		yes	no	no			Dem et al 2013	Dem et al 2013	Müller 1962	Müller 1962
Hemiptera_Membracidae	Hemiptera	Membracidae	T-symbiont		yes		yes	Darniinae	sp54			phloem	phloem	intra	Prokaryota		yes	no	no			Dem et al 2013	Dem et al 2013	Müller 1962	Müller 1962
Hemiptera_Membracidae	Hemiptera	Membracidae	T-symbiont		yes		yes	Darniinae	sp55			phloem	phloem	intra	Prokaryota		yes	no	no			Dem et al 2013	Dem et al 2013	Müller 1962	Müller 1962
Hemiptera_Membracidae	Hemiptera	Membracidae	T-symbiont		yes		yes	Darniinae	sp56			phloem	phloem	intra	Prokaryota		yes	no	no			Dem et al 2013	Dem et al 2013	Müller 1962	Müller 1962
Hemiptera_Membracidae	Hemiptera	Membracidae	T-symbiont		yes		yes	Darniinae	sp57			phloem	phloem	intra	Prokaryota		yes	no	no			Dem et al 2013	Dem et al 2013	Müller 1962	Müller 1962
Hemiptera_Membracidae	Hemiptera	Membracidae	T-symbiont		yes		yes	Darniinae	sp58			phloem	phloem	intra	Prokaryota		yes	no	no			Dem et al 2013	Dem et al 2013	Müller 1962	Müller 1962
Hemiptera_Membracidae	Hemiptera	Membracidae	T-symbiont		yes		yes	Darniinae	sp59			phloem	phloem	intra	Prokaryota		yes	no	no			Dem et al 2013	Dem et al 2013	Müller 1962	Müller 1962
Hemiptera_Membracidae	Hemiptera	Membracidae	T-symbiont		yes		yes	Tolaniinae	sp6			phloem	phloem	intra	Prokaryota		yes	no	no			Dem et al 2013	Dem et al 2013	Müller 1962	Müller 1962
Hemiptera_Membracidae	Hemiptera	Membracidae	T-symbiont		yes		yes	Darniinae	sp60			phloem	phloem	intra	Prokaryota		yes	no	no			Dem et al 2013	Dem et al 2013	Müller 1962	Müller 1962
Hemiptera_Membracidae	Hemiptera	Membracidae	T-symbiont		yes		yes	Polyglypginae	sp61			phloem	phloem	intra	Prokaryota		yes	no	no			Dem et al 2013	Dem et al 2013	Müller 1962	Müller 1962
Hemiptera_Membracidae	Hemiptera	Membracidae	T-symbiont		yes		yes	Polyglypginae	sp62			phloem	phloem	intra	Prokaryota		yes	no	no			Dem et al 2013	Dem et al 2013	Müller 1962	Müller 1962
Hemiptera_Membracidae	Hemiptera	Membracidae	T-symbiont		yes		yes	Polyglypginae	sp63			phloem	phloem	intra	Prokaryota		yes	no	no			Dem et al 2013	Dem et al 2013	Müller 1962	Müller 1962
Hemiptera_Membracidae	Hemiptera	Membracidae	T-symbiont		yes		yes	Polyglypginae	sp64			phloem	phloem	intra	Prokaryota		yes	no	no			Dem et al 2013	Dem et al 2013	Müller 1962	Müller 1962
Hemiptera_Membracidae	Hemiptera	Membracidae	T-symbiont		yes		yes	Polyglypginae	sp65			phloem	phloem	intra	Prokaryota		yes	no	no			Dem et al 2013	Dem et al 2013	Müller 1962	Müller 1962
Hemiptera_Membracidae	Hemiptera	Membracidae	T-symbiont		yes		yes	Polyglypginae	sp66			phloem	phloem	intra	Prokaryota		yes	no	no			Dem et al 2013	Dem et al 2013	Müller 1962	Müller 1962
Hemiptera_Membracidae	Hemiptera	Membracidae	T-symbiont		yes		yes	Polyglypginae	sp67			phloem	phloem	intra	Prokaryota		yes	no	no			Dem et al 2013	Dem et al 2013	Müller 1962	Müller 1962
Hemiptera_Membracidae	Hemiptera	Membracidae	T-symbiont		yes		yes	Polyglypginae	sp68			phloem	phloem	intra	Prokaryota		yes	no	no			Dem et al 2013	Dem et al 2013	Müller 1962	Müller 1962
Hemiptera_Membracidae	Hemiptera	Membracidae	T-symbiont		yes		yes	Polyglypginae	sp69			phloem	phloem	intra	Prokaryota		yes	no	no			Dem et al 2013	Dem et al 2013	Müller 1962	Müller 1962
Hemiptera_Membracidae	Hemiptera	Membracidae	T-symbiont		yes		yes	Tolaniinae	sp7			phloem	phloem	intra	Prokaryota		yes	no	no			Dem et al 2013	Dem et al 2013	Müller 1962	Müller 1962
Hemiptera_Membracidae	Hemiptera	Membracidae	T-symbiont		yes		yes	Polyglypginae	sp70			phloem	phloem	intra	Prokaryota		yes	no	no			Dem et al 2013	Dem et al 2013	Müller 1962	Müller 1962
Hemiptera_Membracidae	Hemiptera	Membracidae	T-symbiont		yes		yes	Polyglypginae	sp71			phloem	phloem	intra	Prokaryota		yes	no	no			Dem et al 2013	Dem et al 2013	Müller 1962	Müller 1962
Hemiptera_Membracidae	Hemiptera	Membracidae	T-symbiont		yes		yes	Polyglypginae	sp72			phloem	phloem	intra	Prokaryota		yes	no	no			Dem et al 2013	Dem et al 2013	Müller 1962	Müller 1962
Hemiptera_Membracidae	Hemiptera	Membracidae	T-symbiont		yes		yes	Polyglypginae	sp73			phloem	phloem	intra	Prokaryota		yes	no	no			Dem et al 2013	Dem et al 2013	Müller 1962	Müller 1962
Hemiptera_Membracidae	Hemiptera	Membracidae	T-symbiont		yes		yes	Polyglypginae	sp74			phloem	phloem	intra	Prokaryota		yes	no	no			Dem et al 2013	Dem et al 2013	Müller 1962	Müller 1962
Hemiptera_Membracidae	Hemiptera	Membracidae	T-symbiont		yes		yes	Polyglypginae	sp75			phloem	phloem	intra	Prokaryota		yes	no	no			Dem et al 2013	Dem et al 2013	Müller 1962	Müller 1962
Hemiptera_Membracidae	Hemiptera	Membracidae	T-symbiont		yes		yes	Polyglypginae	sp76			phloem	phloem	intra	Prokaryota		yes	no	no			Dem et al 2013	Dem et al 2013	Müller 1962	Müller 1962
Hemiptera_Membracidae	Hemiptera	Membracidae	T-symbiont		yes		yes	Membraeinae	sp77			phloem	phloem	intra	Prokaryota		yes	no	no			Dem et al 2013	Dem et al 2013	Müller 1962	Müller 1962
Hemiptera_Membracidae	Hemiptera	Membracidae	T-symbiont		yes		yes	Membraeinae	sp78			phloem	phloem	intra	Prokaryota		yes	no	no			Dem et al 2013	Dem et al 2013	Müller 1962	Müller 1962
Hemiptera_Membracidae	Hemiptera	Membracidae	T-symbiont		yes		yes	Membraeinae	sp79			phloem	phloem	intra	Prokaryota		yes	no	no			Dem et al 2013	Dem et al 2013	Müller 1962	Müller 1962
Hemiptera_Membracidae	Hemiptera	Membracidae	T-symbiont		yes		yes	Tolaniinae	sp8			phloem	phloem	intra	Prokaryota		yes	no	no			Dem et al 2013	Dem et al 2013	Müller 1962	Müller 1962
Hemiptera_Membracidae	Hemiptera	Membracidae	T-symbiont		yes		yes	Membraeinae	sp80			phloem	phloem	intra	Prokaryota		yes	no	no			Dem et al 2013	Dem et al 2013	Müller 1962	Müller 1962
Hemiptera_Membracidae	Hemiptera	Membracidae	T-symbiont		yes		yes	Membraeinae	sp81			phloem	phloem	intra	Prokaryota		yes	no	no			Dem et al 2013	Dem et al 2013	Müller 1962	Müller 1962
Hemiptera_Membracidae	Hemiptera	Membracidae	T-symbiont		yes		yes	Membraeinae	sp82			phloem	phloem	intra	Prokaryota		yes	no	no			Dem et al 2013	Dem et al 2013	Müller 1962	Müller 1962
Hemiptera_Membracidae	Hemiptera	Membracidae	T-symbiont		yes		yes	Membraeinae	sp83			phloem	phloem	intra	Prokaryota		yes	no	no			Dem et al 2013	Dem et al 2013	Müller 1962	Müller 1962
Hemiptera_Membracidae	Hemiptera	Membracidae	T-symbiont		yes		yes	Membraeinae	sp84			phloem	phloem	intra	Prokaryota		yes	no	no			Dem et al 2013	Dem et al 2013	Müller 1962	Müller 1962
Hemiptera_Membracidae	Hemiptera	Membracidae	T-symbiont		yes		yes	Membraeinae	sp85			phloem	phloem	intra	Prokaryota		yes	no	no			Dem et al 2013	Dem et al 2013	Müller 1962	Müller 1962
Hemiptera_Membracidae	Hemiptera	Membracidae	T-symbiont		yes		yes	Membraeinae	sp86			phloem	phloem	intra	Prokaryota		yes	no	no			Dem et al 2013	Dem et al 2013	Müller 1962	Müller 1962
Hemiptera_Membracidae	Hemiptera	Membracidae	T-symbiont		yes		yes	Membraeinae	sp87			phloem	phloem	intra	Prokaryota		yes	no	no			Dem et al 2013	Dem et al 2013	Müller 1962	Müller 1962
Hemiptera_Membracidae	Hemiptera	Membracidae	T-symbiont		yes		yes	Membraeinae	sp88			phloem	phloem	intra	Prokaryota		yes	no	no			Dem et al 2013	Dem et al 2013	Müller 1962	Müller 1962
Hemiptera_Membracidae	Hemiptera	Membracidae	T-symbiont		yes		yes	Membraeinae	sp89			phloem	phloem	intra	Prokaryota		yes	no	no			Dem et al 2013	Dem et al 2013	Müller 1962	Müller 1962
Hemiptera_Membracidae	Hemiptera	Membracidae	T-symbiont		yes		yes	Centrotinae	sp9			phloem	phloem	intra	Prokaryota		yes	no	no			Dem et al 2013	Dem et al 2013	Müller 1962	Müller 1962
Hemiptera_Membracidae	Hemiptera	Membracidae	T-symbiont		yes		yes	Membraeinae	sp90			phloem	phloem	intra	Prokaryota		yes	no	no			Dem et al 2013	Dem et al 2013	Müller 1962	Müller 1962
Hemiptera_Membracidae	Hemiptera	Membracidae	T-symbiont		yes		yes	Membraeinae	sp91			phloem	phloem	intra	Prokaryota		yes	no	no			Dem et al 2013	Dem et al 2013	Müller 1962	Müller 1962
Hemiptera_Membracidae	Hemiptera	Membracidae	T-symbiont		yes		yes	Membraeinae	sp92			phloem	phloem	intra	Prokaryota		yes	no	no			Dem et al 2013	Dem et al 2013	Müller 1962	Müller 1962
Hemiptera_Membracidae	Hemiptera	Membracidae	T-symbiont		yes		yes	Membraeinae	sp93			phloem	phloem	intra	Prokaryota		yes	no	no			Dem et al 2013	Dem et al 2013	Müller 1962	Müller 1962
Hemiptera_Membracidae	Hemiptera	Membracidae	T-symbiont		yes		yes	Membraeinae	sp94			phloem	phloem	intra	Prokaryota		yes	no	no			Dem et al 2013	Dem et al 2013	Müller 1962	Müller 1962
Hemiptera_Membracidae	Hemiptera	Membracidae	U-symbiont		yes		yes	Heteronotinae	sp18			phloem	phloem	intra	Prokaryota		yes	no	no			Dem et al 2013	Dem et al 2013	Müller 1962	Müller 1962
Hemiptera_Membracidae	Hemiptera	Membracidae	V-symbiont		yes		yes	Heteronotinae	sp18			phloem	phloem	intra	Prokaryota		yes	no	no			Dem et al 2013	Dem et al 2013	Müller 1962	Müller 1962
Hemiptera_Miridae	Hemiptera	Miridae	none known		none known		no	gen	sp			insects/leaves/seeds	insects/leaves/seeds				yes	no	no			Jung and Lee 2012	Jung and Lee 2012	Schneider 1939	Schneider 1939
Hemiptera_Miridae	Hemiptera	Miridae	Rickettsia sp.		none known	not ubiquitous	no	Macrolophus	pygmaeus			insects/leaves/seeds	insects/leaves/seeds	intra	Prokaryota		yes	no	no			Jung and Lee 2012	Jung and Lee 2012	Machtelinckx et al 2012	Machtelinckx et al 2012
Hemiptera_Monophlebidae	Hemiptera	Monophlebidae	Candidatus Walczuchella monophlebidarum	Flavobacteriales_symbiont_of_Llaveia_axin	yes		yes	Llaveia	axin			phloem	phloem	intra	Prokaryota		yes	yes	no			Rosas-Pérez et al 2014 Resh and Cardé 2009 Matsuura et al 2009	Rosas-Pérez et al 2014 Resh and Cardé 2009 Matsuura et al 2009	Rosas-Pérez et al 2014	Rosas-Pérez et al 2014
Hemiptera_Monophlebidae	Hemiptera	Monophlebidae	Enterobacteriaceae	Enterobacterial_symbiont_of_Drosicha_corpulenta	yes		yes	Drosicha	corpulenta			phloem	phloem	intra	Prokaryota		yes	yes	no			Rosas-Pérez et al 2014 Resh and Cardé 2009 Matsuura et al 2009	Rosas-Pérez et al 2014 Resh and Cardé 2009 Matsuura et al 2009	Matsuura et al 2009	Matsuura et al 2009
Hemiptera_Monophlebidae	Hemiptera	Monophlebidae	Enterobacteriaceae	Enterobacterial_symbiont_of_Drosicha_corpulenta	yes		yes	Drosicha	pinicola			phloem	phloem	intra	Prokaryota		yes	yes	no			Rosas-Pérez et al 2014 Resh and Cardé 2009 Matsuura et al 2009	Rosas-Pérez et al 2014 Resh and Cardé 2009 Matsuura et al 2009	Matsuura et al 2009	Matsuura et al 2009
Hemiptera_Monophlebidae	Hemiptera	Monophlebidae	Enterobacteriaceae	Enterobacterial_symbiont_of_Drosicha_corpulenta	yes		yes	Llaveia	axin			phloem	phloem	intra	Prokaryota		yes	yes	no			Rosas-Pérez et al 2014 Resh and Cardé 2009 Matsuura et al 2009	Rosas-Pérez et al 2014 Resh and Cardé 2009 Matsuura et al 2009	Rosas-Pérez et al 2014	Rosas-Pérez et al 2014
Hemiptera_Monophlebidae	Hemiptera	Monophlebidae	Flavobacteriales		yes		yes	Drosicha	corpulenta			phloem	phloem	intra	Prokaryota		yes	no	no			Rosas-Pérez et al 2014 Resh and Cardé 2009 Matsuura et al 2009	Rosas-Pérez et al 2014 Resh and Cardé 2009 Matsuura et al 2009	Matsuura et al 2009	Matsuura et al 2009
Hemiptera_Monophlebidae	Hemiptera	Monophlebidae	Flavobacteriales		yes		yes	Drosicha	pinicola			phloem	phloem	intra	Prokaryota		yes	no	no			Rosas-Pérez et al 2014 Resh and Cardé 2009 Matsuura et al 2009	Rosas-Pérez et al 2014 Resh and Cardé 2009 Matsuura et al 2009	Matsuura et al 2009	Matsuura et al 2009
Hemiptera_Nabidae	Hemiptera	Nabidae	none known		none known		no	gen	sp			insects	insects				yes	no	no			Resh and Cardé 2009	Resh and Cardé 2009	Schneider 1939	Schneider 1939
Hemiptera_Naucoridae	Hemiptera	Naucoridae	none known		none known		no	gen	sp			insects	insects				yes	no	no			Resh and Cardé 2009	Resh and Cardé 2009	Schneider 1939	Schneider 1939
Hemiptera_Nepidae	Hemiptera	Nepidae	none known		none known		no	gen	sp			insects	insects				yes	no	no			Resh and Cardé 2009	Resh and Cardé 2009	Schneider 1939	Schneider 1939
Hemiptera_Nogodinidae	Hemiptera	Nogodinidae	Candidatus Sulcia muelleri	Candidatus_Sulcia_muelleri_of_Nogodinidae	yes	cosegragation	yes	gen	sp1			phloem	phloem	intra	Prokaryota		yes	no	no			Novotny and Wilson 1997 Dem et al 2013	Novotny and Wilson 1997 Dem et al 2013	Müller 1962	Müller 1962
Hemiptera_Nogodinidae	Hemiptera	Nogodinidae	Candidatus Sulcia muelleri	Candidatus_Sulcia_muelleri_of_Nogodinidae	yes	cosegragation	yes	Danepteryx	sp			phloem	phloem	intra	Prokaryota		yes	no	no			Novotny and Wilson 1997 Dem et al 2013	Novotny and Wilson 1997 Dem et al 2013	Urban and Cryan 2012
Hemiptera_Nogodinidae	Hemiptera	Nogodinidae	Candidatus Vidania fulgoroideae	Candidatus_Vidania_fulgoroidaea_of_Nogodinidae	yes	cosegragation	yes	Danepteryx	sp			phloem	phloem	intra	Prokaryota		yes	no	no			Novotny and Wilson 1997 Dem et al 2013	Novotny and Wilson 1997 Dem et al 2013	Urban and Cryan 2012
Hemiptera_Notonectidae	Hemiptera	Notonectidae	none known		none known		no	gen	sp			insects	insects				yes	no	no			Resh and Cardé 2009	Resh and Cardé 2009	Schneider 1939	Schneider 1939
Hemiptera_Ortheziidae	Hemiptera	Ortheziidae	Enterobacteriaceae														no	no	no					Rosenblueth et al 2012
Hemiptera_Ortheziidae	Hemiptera	Ortheziidae	Flavobacteriales														no	no	no					Rosenblueth et al 2012
Hemiptera_Oxycarenidae	Hemiptera	Oxycarenidae															no	no	no					Schneider 1939
Hemiptera_Pachygronthidae	Hemiptera	Pachygronthidae	Burkholdaria														no	no	no					Kikuchi et al 2011
Hemiptera_Parastrachiidae	Hemiptera	Parastrachiidae	Candidatus Benitsuchiphilus tojoi	Candidatus_Benitsuchiphilus_tojoi	no (gut crypt localised symbiont)	fitness reduction	yes	Parastrachia	japonensis	fruit	nonfeeding			extra	Prokaryota		yes	yes	yes	Kashima et al 2006	Kashima et al 2006			Kashima et al 2006	Hosokawa et al 2010
Hemiptera_Peloridiidae	Hemiptera	Peloridiidae	Candidatus Evansia muelleri	Candidatus_Evansia_muelleri	yes	cosegragation	yes	Hemiodoecus	acutus			phloem	phloem	intra	Prokaryota		yes	yes	yes			Bechly and Szwedo 2007 Kuechler et al 2013	Bechly and Szwedo 2007 Kuechler et al 2013	Kuechler et al 2013	Kuechler et al 2013
Hemiptera_Peloridiidae	Hemiptera	Peloridiidae	Candidatus Evansia muelleri	Candidatus_Evansia_muelleri	yes	cosegragation	yes	Hackeriella	brachycephala			phloem	phloem	intra	Prokaryota		yes	yes	yes			Bechly and Szwedo 2007 Kuechler et al 2013	Bechly and Szwedo 2007 Kuechler et al 2013	Kuechler et al 2013	Kuechler et al 2013
Hemiptera_Peloridiidae	Hemiptera	Peloridiidae	Candidatus Evansia muelleri	Candidatus_Evansia_muelleri	yes	cosegragation	yes	Xenophyes	cascus			phloem	phloem	intra	Prokaryota		yes	yes	yes			Bechly and Szwedo 2007 Kuechler et al 2013	Bechly and Szwedo 2007 Kuechler et al 2013	Kuechler et al 2013	Kuechler et al 2013
Hemiptera_Peloridiidae	Hemiptera	Peloridiidae	Candidatus Evansia muelleri	Candidatus_Evansia_muelleri	yes	cosegragation	yes	Hemiodoecus	crassus			phloem	phloem	intra	Prokaryota		yes	yes	yes			Bechly and Szwedo 2007 Kuechler et al 2013	Bechly and Szwedo 2007 Kuechler et al 2013	Kuechler et al 2013	Kuechler et al 2013
Hemiptera_Peloridiidae	Hemiptera	Peloridiidae	Candidatus Evansia muelleri	Candidatus_Evansia_muelleri	yes	cosegragation	yes	Oiophysa	cumberi			phloem	phloem	intra	Prokaryota		yes	yes	yes			Bechly and Szwedo 2007 Kuechler et al 2013	Bechly and Szwedo 2007 Kuechler et al 2013	Kuechler et al 2013	Kuechler et al 2013
Hemiptera_Peloridiidae	Hemiptera	Peloridiidae	Candidatus Evansia muelleri	Candidatus_Evansia_muelleri	yes	cosegragation	yes	Oiophysa	distincta			phloem	phloem	intra	Prokaryota		yes	yes	yes			Bechly and Szwedo 2007 Kuechler et al 2013	Bechly and Szwedo 2007 Kuechler et al 2013	Kuechler et al 2013	Kuechler et al 2013
Hemiptera_Peloridiidae	Hemiptera	Peloridiidae	Candidatus Evansia muelleri	Candidatus_Evansia_muelleri	yes	cosegragation	yes	Hemiodoecellus	fidelis			phloem	phloem	intra	Prokaryota		yes	yes	yes			Bechly and Szwedo 2007 Kuechler et al 2013	Bechly and Szwedo 2007 Kuechler et al 2013	Kuechler et al 2013	Kuechler et al 2013
Hemiptera_Peloridiidae	Hemiptera	Peloridiidae	Candidatus Evansia muelleri	Candidatus_Evansia_muelleri	yes	cosegragation	yes	Xenophysella	greensladeae			phloem	phloem	intra	Prokaryota		yes	yes	yes			Bechly and Szwedo 2007 Kuechler et al 2013	Bechly and Szwedo 2007 Kuechler et al 2013	Kuechler et al 2013	Kuechler et al 2013
[truncated: 519 more rows]

## Sheet: Table S3
Table S3: Results of Genbank searches used to recover insect species that have been associated with specific vertically transmitted symbionts
[truncated: 76 more rows]

[truncated: 23 more sheets: Table S4, Table S5, Table S6, Table S7, Table S8, Table S9, Table S10, Table S11, Table S12, Table S13, Table S14, Table S15, Table S16, Table S17, Table S18, Table S19, Table S20, Table S21, Table S22, Table S23 …]
